# Supplementary material
Source: PubMed Central journal article supplement (PMC2427223)
Supplement: mmc1.pdf [file mmc1.pdf]

## Supplemental Data

## Evaluation of Genetic Variation Contributing to Differences in Gene Expression between Populations

Wei Zhang, Shiwei Duan, Emily O. Kistner, Wasim K. Bleibel, R. Stephanie Huang, Tyson A. Clark, Tina X. Chen, Anthony C. Schweitzer, John E. Blume, Nancy J. Cox, and M. Eileen Dolan

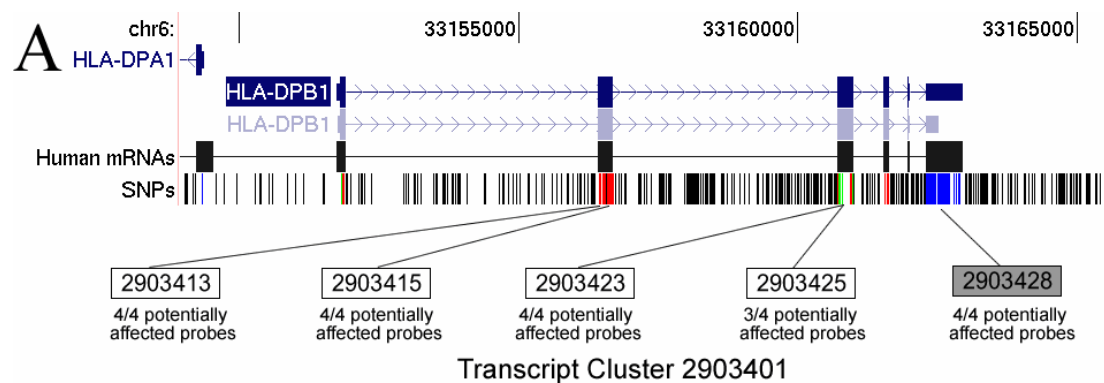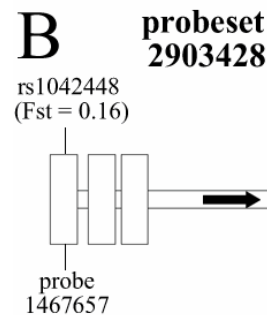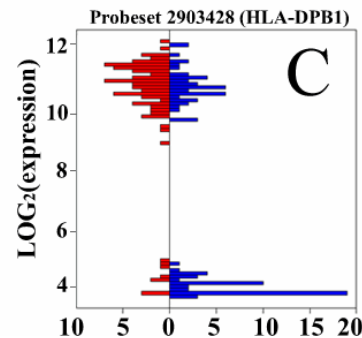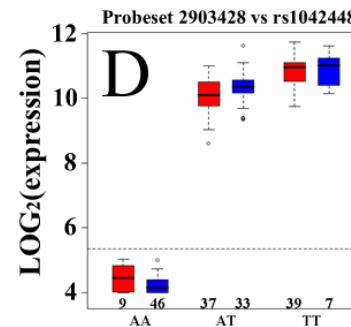

### Figure S1. The Measurement of Gene Expression Level Could Be Biased by the Presence of SNPs in Probesets

(A) shows that transcript cluster 2903401, which represents *HLA-DPB1*, consists of five probesets with potentially affected probes.

(B) illustrates SNP rs1042448, which is located in the first probe of probeset 2903428. The arrow shows the direction of *HLA-DPB1*.  $F_{st}$  value was estimated between the unrelated CEU and YRI samples.

(C) shows that the expression of probeset 2903428 in CEU (red) and YRI (blue) is significantly different.

(D) shows that SNP rs1042448 significantly affects the expression of probeset 2903428, which represents the 3'-UTR of gene *HLA-DPB1* in both CEU (red) and YRI (blue) populations. The horizontal dashed line is the 1st quantile expression value of the set of core probesets. Probesets with expression below the horizontal dash are considered not expressed.

**Table S1. 383 Transcript Clusters Were Differentially Expressed between the CEU and YRI Samples**

| <i>Affymetrix Transcript Cluster ID</i> | <i>Gene Symbol</i>                      | <i>M(CEU)<sup>a</sup></i> | <i>M(YRI)<sup>a</sup></i> | <i>S(CEU)<sup>b</sup></i> | <i>S(YRI)<sup>b</sup></i> | <i>P(WY)<sup>c</sup></i> | <i>P(GLM)<sup>d</sup></i> | <i>CNV<sup>e</sup></i> |
|-----------------------------------------|-----------------------------------------|---------------------------|---------------------------|---------------------------|---------------------------|--------------------------|---------------------------|------------------------|
| 2326993                                 | SYTL1                                   | 6.92                      | 6.67                      | 0.24                      | 0.29                      | 5.0E-04                  | 2.1E-07                   | N                      |
| 2333678                                 | B4GALT2 ///ATP6V0B                      | 8.61                      | 8.39                      | 0.24                      | 0.24                      | 1.5E-03                  | 2.4E-06                   | N                      |
| 2334191                                 | PLK3 /// SMAD3                          | 8.07                      | 7.82                      | 0.26                      | 0.24                      | 2.0E-04                  | 2.4E-08                   | N                      |
| 2391302                                 | CENTB5                                  | 7.61                      | 7.49                      | 0.13                      | 0.15                      | 2.8E-03                  | 1.1E-06                   | Y                      |
| 2394361                                 | NPHP4                                   | 6.73                      | 6.63                      | 0.12                      | 0.11                      | 7.6E-03                  | 2.4E-06                   | N                      |
| 2394626                                 | ACOT7                                   | 7.43                      | 7.27                      | 0.15                      | 0.16                      | 0                        | 2.8E-08                   | N                      |
| 2396461                                 | SRM /// MASP2                           | 10.63                     | 10.42                     | 0.24                      | 0.22                      | 6.0E-04                  | 1.8E-07                   | N                      |
| 2400793                                 | HSPG2                                   | 6.56                      | 6.43                      | 0.16                      | 0.13                      | 3.4E-03                  | 2.4E-06                   | Y                      |
| 2458921                                 | ITPKB                                   | 7.73                      | 7.37                      | 0.44                      | 0.40                      | 5.6E-03                  | 2.6E-07                   | N                      |
| 2489071                                 | LOC652533 /// MGC22014 ///<br>LOC442020 | 7.76                      | 7.55                      | 0.23                      | 0.27                      | 4.3E-03                  | 5.3E-06                   | N                      |
| 2532021                                 | PTMA                                    | 7.74                      | 7.45                      | 0.28                      | 0.27                      | 0                        | 8.6E-08                   | Y                      |
| 2550325                                 | HAAO /// OXER1                          | 7.76                      | 7.54                      | 0.24                      | 0.23                      | 3.0E-04                  | 8.0E-08                   | N                      |
| 2560141                                 | MRPL53                                  | 9.83                      | 9.48                      | 0.33                      | 0.36                      | 2.0E-04                  | 1.1E-07                   | Y                      |
| 2576281                                 | LOC130074                               | 9.40                      | 9.24                      | 0.17                      | 0.15                      | 4.0E-04                  | 9.1E-07                   | Y                      |
| 2576554                                 | ---                                     | 8.48                      | 7.79                      | 0.33                      | 0.56                      | 0                        | 2.5E-11                   | N                      |
| 2655438                                 | DVL3                                    | 8.41                      | 8.29                      | 0.15                      | 0.13                      | 2.5E-03                  | 3.5E-06                   | N                      |
| 2672016                                 | FYCO1 /// GRP                           | 6.61                      | 6.43                      | 0.21                      | 0.18                      | 6.0E-04                  | 1.7E-07                   | N                      |
| 2676009                                 | PTK9L /// TLR9                          | 9.41                      | 9.19                      | 0.22                      | 0.26                      | 4.0E-04                  | 3.3E-06                   | N                      |
| 2694675                                 | H1FX                                    | 7.92                      | 7.63                      | 0.29                      | 0.33                      | 4.0E-04                  | 3.5E-07                   | N                      |
| 2714729                                 | KIAA1530 /// LOC651314                  | 6.82                      | 6.63                      | 0.22                      | 0.22                      | 7.7E-03                  | 2.8E-06                   | N                      |
| 2757347                                 | TMEM129                                 | 7.13                      | 6.95                      | 0.19                      | 0.20                      | 8.0E-04                  | 7.3E-07                   | N                      |
| 2766262                                 | TLR6                                    | 7.76                      | 7.33                      | 0.52                      | 0.46                      | 2.4E-03                  | 1.6E-06                   | N                      |
| 2829171                                 | TCF7                                    | 7.93                      | 7.43                      | 0.60                      | 0.49                      | 1.2E-03                  | 9.8E-07                   | N                      |
| 2830861                                 | EGR1                                    | 8.21                      | 7.70                      | 0.55                      | 0.53                      | 4.0E-04                  | 2.4E-07                   | N                      |
| 2843091                                 | RGS14                                   | 8.70                      | 8.46                      | 0.29                      | 0.22                      | 4.0E-04                  | 1.1E-06                   | Y                      |
| 2865050                                 | RPS23                                   | 8.71                      | 8.15                      | 0.49                      | 0.38                      | 0                        | 8.0E-10                   | N                      |
| 2881672                                 | TNIP1                                   | 10.06                     | 9.80                      | 0.26                      | 0.31                      | 1.2E-03                  | 1.2E-06                   | N                      |
| 2897899                                 | SOX4                                    | 7.89                      | 7.62                      | 0.21                      | 0.25                      | 0                        | 3.2E-09                   | N                      |

AJHG, Volume 82

|         |                |       |       |      |      |         |         |   |
|---------|----------------|-------|-------|------|------|---------|---------|---|
| 2901970 | DDR1 /// VARSL | 7.13  | 6.88  | 0.31 | 0.24 | 1.5E-03 | 9.6E-07 | N |
| 2904000 | HMGA1          | 8.28  | 8.09  | 0.21 | 0.25 | 9.4E-03 | 3.8E-06 | N |
| 2905169 | CDKN1A         | 8.62  | 8.34  | 0.34 | 0.24 | 7.0E-04 | 6.5E-07 | N |
| 2906824 | FOXP4          | 8.15  | 7.80  | 0.38 | 0.36 | 4.0E-04 | 7.0E-07 | N |
| 2927722 | HEBP2          | 8.52  | 7.77  | 0.47 | 0.65 | 0       | 2.2E-10 | N |
| 2939232 | TUBB2B         | 7.61  | 6.68  | 1.00 | 0.67 | 0       | 1.8E-07 | N |
| 2946215 | HIST1H3B       | 8.48  | 7.48  | 1.14 | 0.77 | 2.0E-04 | 1.6E-07 | N |
| 2950629 | TAPBP          | 10.85 | 10.55 | 0.24 | 0.37 | 4.0E-04 | 1.8E-06 | N |
| 2954355 | CUL7           | 7.46  | 7.25  | 0.20 | 0.21 | 2.0E-04 | 7.1E-08 | N |
| 3008220 | CYLN2          | 8.35  | 8.09  | 0.23 | 0.24 | 0       | 6.3E-09 | N |
| 3016636 | SH2B2          | 8.70  | 8.22  | 0.52 | 0.64 | 8.0E-03 | 1.3E-06 | N |
| 3023318 | TSPAN33        | 9.54  | 9.11  | 0.46 | 0.39 | 2.0E-04 | 4.1E-07 | N |
| 3026969 | HSPC268        | 7.15  | 6.95  | 0.21 | 0.25 | 2.7E-03 | 1.9E-07 | N |
| 3057755 | POMZP3         | 7.41  | 7.19  | 0.24 | 0.26 | 1.5E-03 | 3.7E-06 | N |
| 3062868 | BAIAP2L1       | 7.94  | 6.99  | 1.02 | 0.89 | 3.0E-04 | 5.3E-08 | Y |
| 3065546 | FLJ36166       | 7.29  | 6.59  | 0.49 | 0.73 | 0       | 9.5E-09 | N |
| 3089360 | SLC39A14       | 8.21  | 7.87  | 0.34 | 0.37 | 3.0E-04 | 2.1E-07 | Y |
| 3091077 | DPYSL2         | 8.70  | 8.16  | 0.52 | 0.52 | 1.0E-04 | 7.9E-09 | N |
| 3119945 | GRINA          | 8.86  | 8.55  | 0.35 | 0.32 | 1.2E-03 | 4.1E-06 | N |
| 3158478 | FBXL6          | 7.35  | 7.13  | 0.21 | 0.18 | 0       | 2.3E-08 | Y |
| 3158767 | RECQL4         | 7.53  | 7.35  | 0.18 | 0.20 | 3.0E-04 | 5.0E-07 | N |
| 3158812 | LRRC24         | 7.07  | 6.89  | 0.17 | 0.15 | 0       | 1.6E-08 | N |
| 3181240 | TMOD1          | 8.06  | 7.38  | 0.65 | 0.57 | 0       | 6.6E-09 | N |
| 3188697 | NEK6           | 10.68 | 10.45 | 0.22 | 0.30 | 3.4E-03 | 9.2E-07 | N |
| 3190762 | ENDOG          | 6.83  | 6.59  | 0.23 | 0.25 | 2.0E-04 | 1.1E-07 | N |
| 3193339 | RXRA           | 7.85  | 7.59  | 0.26 | 0.33 | 1.9E-03 | 6.0E-07 | N |
| 3225096 | NR6A1          | 7.02  | 6.66  | 0.32 | 0.38 | 2.0E-04 | 7.0E-08 | N |
| 3226340 | PTGES2         | 7.78  | 7.54  | 0.25 | 0.31 | 3.4E-03 | 2.8E-06 | N |
| 3230811 | DPP7           | 9.22  | 8.86  | 0.29 | 0.27 | 0       | 6.4E-10 | N |
| 3261643 | NFKB2          | 9.89  | 9.62  | 0.26 | 0.31 | 4.0E-04 | 4.7E-07 | N |
| 3299504 | ACTA2          | 8.01  | 7.50  | 0.45 | 0.37 | 0       | 2.4E-10 | N |
| 3315024 | ADAM8          | 8.43  | 8.07  | 0.34 | 0.31 | 0       | 2.7E-09 | Y |
| 3316149 | EPS8L2         | 7.01  | 6.85  | 0.18 | 0.16 | 3.0E-04 | 2.9E-08 | Y |

AJHG, Volume 82

|         |                      |       |       |      |      |         |         |   |
|---------|----------------------|-------|-------|------|------|---------|---------|---|
| 3326635 | CD44 /// MAPK10      | 10.52 | 9.95  | 0.58 | 0.62 | 4.0E-04 | 4.7E-08 | Y |
| 3329649 | DDB2                 | 9.32  | 9.10  | 0.28 | 0.23 | 1.9E-03 | 9.5E-07 | N |
| 3333358 | INCENP               | 8.20  | 8.00  | 0.20 | 0.20 | 3.0E-04 | 1.6E-09 | N |
| 3337918 | TPCN2                | 7.80  | 7.52  | 0.25 | 0.32 | 3.0E-04 | 8.1E-08 | N |
| 3338552 | CTTN                 | 7.08  | 6.81  | 0.34 | 0.27 | 2.7E-03 | 4.5E-07 | N |
| 3358425 | LRDD                 | 7.62  | 7.31  | 0.21 | 0.21 | 0       | 1.4E-11 | Y |
| 3431892 | SH2B3                | 8.27  | 8.02  | 0.23 | 0.21 | 0       | 3.0E-08 | N |
| 3439013 | NOC4L                | 7.53  | 7.34  | 0.19 | 0.20 | 4.0E-04 | 3.7E-08 | N |
| 3452818 | VDR                  | 6.96  | 6.54  | 0.53 | 0.47 | 7.3E-03 | 1.4E-06 | N |
| 3476457 | NCOR2                | 8.55  | 8.37  | 0.19 | 0.19 | 4.0E-04 | 2.1E-07 | N |
| 3543539 | PAPLN                | 6.65  | 6.39  | 0.29 | 0.24 | 3.0E-04 | 9.3E-08 | N |
| 3554728 | MTA1                 | 8.84  | 8.65  | 0.20 | 0.22 | 1.2E-03 | 2.2E-06 | Y |
| 3557666 | JPH4                 | 7.07  | 6.86  | 0.29 | 0.17 | 9.0E-04 | 5.7E-07 | N |
| 3572869 | C14orf4              | 7.98  | 7.79  | 0.22 | 0.19 | 8.0E-04 | 4.3E-07 | N |
| 3603687 | TMED3                | 8.12  | 7.92  | 0.24 | 0.21 | 3.2E-03 | 1.4E-06 | N |
| 3604287 | IL16                 | 7.06  | 6.87  | 0.23 | 0.22 | 2.8E-03 | 2.0E-06 | N |
| 3643966 | CRAMP1L              | 7.20  | 6.97  | 0.15 | 0.16 | 0       | 4.3E-13 | N |
| 3644057 | MAPK8IP3             | 7.71  | 7.54  | 0.19 | 0.20 | 5.4E-03 | 4.6E-06 | N |
| 3644593 | GBL                  | 8.41  | 8.22  | 0.21 | 0.21 | 9.0E-04 | 3.1E-06 | N |
| 3656318 | PRR14                | 8.53  | 8.39  | 0.16 | 0.17 | 3.4E-03 | 4.1E-07 | N |
| 3656635 | FBXL19               | 7.73  | 7.60  | 0.17 | 0.15 | 9.7E-03 | 4.5E-06 | N |
| 3668834 | ZNRF1                | 7.33  | 7.04  | 0.31 | 0.31 | 4.0E-04 | 4.1E-07 | N |
| 3673684 | CDT1                 | 8.55  | 8.30  | 0.25 | 0.28 | 4.0E-04 | 4.6E-07 | N |
| 3675430 | RPUSD1               | 7.87  | 7.67  | 0.21 | 0.24 | 2.8E-03 | 4.3E-06 | Y |
| 3676113 | NME3                 | 7.37  | 7.16  | 0.24 | 0.22 | 9.0E-04 | 4.5E-07 | N |
| 3677752 | TRAP1                | 9.84  | 9.57  | 0.22 | 0.26 | 0       | 1.4E-08 | N |
| 3704376 | FAM38A               | 8.59  | 8.39  | 0.22 | 0.17 | 2.0E-04 | 7.8E-08 | N |
| 3704495 | APRT                 | 8.49  | 8.23  | 0.25 | 0.28 | 3.0E-04 | 7.3E-07 | N |
| 3712098 | SNORD49A /// SNORD65 | 11.21 | 10.91 | 0.25 | 0.26 | 0       | 1.6E-08 | N |
| 3722770 | C17orf53             | 7.22  | 7.06  | 0.20 | 0.18 | 2.7E-03 | 7.8E-07 | N |
| 3726569 | SPATA20              | 7.59  | 7.07  | 0.51 | 0.44 | 0       | 5.9E-08 | N |
| 3734760 | MRPS7                | 9.63  | 9.39  | 0.18 | 0.24 | 0       | 2.7E-09 | N |
| 3748188 | FLII                 | 8.64  | 8.42  | 0.18 | 0.17 | 0       | 8.4E-11 | N |

## AJHG, Volume 82

|         |                           |       |       |      |      |         |         |   |
|---------|---------------------------|-------|-------|------|------|---------|---------|---|
| 3756319 | CCR7                      | 9.51  | 8.82  | 0.85 | 0.73 | 2.8E-03 | 4.2E-06 | N |
| 3757602 | LGP2 /// GCN5L2           | 7.96  | 7.50  | 0.35 | 0.31 | 0       | 2.5E-11 | N |
| 3773980 | C17orf70                  | 7.73  | 7.54  | 0.19 | 0.23 | 1.6E-03 | 4.4E-07 | N |
| 3774635 | FASN                      | 9.41  | 9.19  | 0.19 | 0.22 | 0       | 1.7E-09 | N |
| 3815416 | ABCA7 /// GATA3           | 7.50  | 7.34  | 0.16 | 0.18 | 6.0E-04 | 1.1E-06 | N |
| 3816225 | C19orf36                  | 7.33  | 7.15  | 0.23 | 0.22 | 9.5E-03 | 7.5E-07 | N |
| 3816611 | THOP1                     | 8.49  | 8.21  | 0.24 | 0.30 | 0       | 1.4E-07 | N |
| 3820469 | ICAM5                     | 6.49  | 6.31  | 0.21 | 0.20 | 1.1E-03 | 1.3E-06 | N |
| 3820727 | QTRT1 /// CCRK            | 7.91  | 7.69  | 0.18 | 0.19 | 0       | 1.1E-10 | N |
| 3821893 | JUNB                      | 9.52  | 9.13  | 0.43 | 0.36 | 3.0E-04 | 8.9E-07 | N |
| 3823982 | MYO9B                     | 9.02  | 8.78  | 0.21 | 0.27 | 2.0E-04 | 1.8E-07 | N |
| 3824178 | ANKRD41                   | 7.29  | 7.04  | 0.30 | 0.29 | 3.7E-03 | 2.3E-06 | N |
| 3824226 | GTPBP3                    | 6.83  | 6.68  | 0.19 | 0.16 | 3.4E-03 | 1.8E-06 | N |
| 3824497 | MAP1S                     | 8.35  | 8.17  | 0.23 | 0.19 | 1.4E-03 | 1.5E-06 | N |
| 3830002 | GRAMD1A                   | 8.80  | 8.55  | 0.27 | 0.28 | 7.0E-04 | 2.1E-06 | N |
| 3830864 | SNX26                     | 6.61  | 6.49  | 0.14 | 0.14 | 7.3E-03 | 1.9E-06 | N |
| 3833620 | LTBP4                     | 7.31  | 7.15  | 0.17 | 0.17 | 4.0E-04 | 4.0E-08 | N |
| 3837464 | SNORD23 /// GLTSCR2       | 9.18  | 8.90  | 0.23 | 0.21 | 0       | 6.9E-11 | N |
| 3839006 | PTOV1                     | 7.56  | 7.32  | 0.31 | 0.24 | 4.3E-03 | 2.9E-06 | N |
| 3839057 | TBC1D17                   | 8.35  | 8.17  | 0.19 | 0.22 | 1.1E-03 | 3.3E-07 | N |
| 3840058 | PPP2R1A                   | 10.33 | 10.07 | 0.21 | 0.30 | 2.0E-04 | 3.1E-07 | N |
| 3846982 | TICAM1                    | 7.65  | 7.47  | 0.23 | 0.20 | 3.4E-03 | 5.9E-07 | N |
| 3848492 | FCER2                     | 11.06 | 10.22 | 0.46 | 0.78 | 0       | 3.8E-11 | N |
| 3850234 | RAVER1                    | 8.47  | 8.29  | 0.20 | 0.20 | 6.0E-04 | 1.2E-06 | N |
| 3850278 | TYK2                      | 9.46  | 9.23  | 0.24 | 0.27 | 1.1E-03 | 3.7E-06 | N |
| 3852407 | RFX1                      | 6.75  | 6.63  | 0.13 | 0.11 | 3.0E-04 | 7.7E-08 | N |
| 3853193 | BRD4 /// SLC26A6          | 8.35  | 8.15  | 0.23 | 0.26 | 9.8E-03 | 2.8E-06 | N |
| 3854349 | ABHD8                     | 7.29  | 7.08  | 0.22 | 0.19 | 2.0E-04 | 1.7E-07 | N |
| 3885537 | PLCG1 /// CPNE9 /// BRPF1 | 8.53  | 8.17  | 0.28 | 0.35 | 0       | 5.7E-10 | N |
| 3892456 | SS18L1                    | 6.47  | 6.35  | 0.15 | 0.13 | 7.2E-03 | 1.5E-06 | N |
| 3893642 | LIME1                     | 7.88  | 7.59  | 0.34 | 0.28 | 6.0E-04 | 3.2E-07 | Y |
| 3903361 | AHCY                      | 9.94  | 9.62  | 0.28 | 0.30 | 0       | 3.9E-08 | N |
| 3903836 | ITGB4BP                   | 9.06  | 8.66  | 0.30 | 0.33 | 0       | 7.1E-11 | N |

## AJHG, Volume 82

|         |                               |       |       |      |      |         |         |   |
|---------|-------------------------------|-------|-------|------|------|---------|---------|---|
| 3923632 | PFKL                          | 9.85  | 9.62  | 0.24 | 0.27 | 3.7E-03 | 1.0E-06 | N |
| 3935232 | C21orf56                      | 7.75  | 7.21  | 0.35 | 0.40 | 0       | 2.9E-11 | N |
| 3939365 | SMARCB1                       | 9.40  | 9.14  | 0.28 | 0.28 | 4.0E-04 | 4.5E-07 | N |
| 3950629 | TRABD                         | 8.96  | 8.73  | 0.26 | 0.25 | 3.4E-03 | 2.6E-06 | N |
| 3960388 | PLA2G6                        | 7.19  | 6.98  | 0.21 | 0.21 | 2.0E-04 | 1.1E-07 | N |
| 3965697 | HDAC10                        | 7.65  | 7.49  | 0.16 | 0.18 | 4.0E-04 | 1.2E-06 | N |
| 3996467 | PLXNA3                        | 7.39  | 6.96  | 0.20 | 0.18 | 0       | 0.0E+00 | N |
| 4027813 | F8A3                          | 8.99  | 8.58  | 0.32 | 0.29 | 0       | 2.1E-11 | N |
| 4044363 | CNR2                          | 7.79  | 7.28  | 0.56 | 0.61 | 3.7E-03 | 1.0E-06 | N |
| 2328868 | HDAC1                         | 9.82  | 10.15 | 0.33 | 0.25 | 0       | 6.2E-09 | N |
| 2331727 | CAP1                          | 11.28 | 11.52 | 0.22 | 0.22 | 1.0E-04 | 9.3E-09 | Y |
| 2336383 | PRPF38A                       | 9.05  | 9.31  | 0.28 | 0.29 | 2.5E-03 | 1.9E-07 | N |
| 2336585 | SCP2                          | 7.24  | 7.60  | 0.53 | 0.32 | 8.8E-03 | 2.4E-06 | N |
| 2342576 | ACADM /// RABGGTB ///<br>MSH4 | 10.42 | 10.67 | 0.33 | 0.27 | 9.2E-03 | 1.3E-06 | N |
| 2350287 | PRPF38B                       | 7.75  | 8.05  | 0.35 | 0.30 | 1.9E-03 | 3.2E-07 | N |
| 2350840 | GNAI3                         | 9.01  | 9.31  | 0.34 | 0.33 | 2.1E-03 | 3.8E-07 | N |
| 2351393 | RBM15                         | 8.38  | 8.58  | 0.21 | 0.27 | 5.0E-03 | 3.2E-06 | N |
| 2351572 | CD53                          | 12.25 | 12.47 | 0.20 | 0.13 | 0       | 6.7E-11 | N |
| 2351632 | CEPT1                         | 9.23  | 9.64  | 0.43 | 0.33 | 1.0E-04 | 5.8E-08 | N |
| 2365119 | MGST3                         | 8.41  | 8.83  | 0.54 | 0.43 | 4.9E-03 | 1.7E-07 | N |
| 2391647 | SSU72                         | 9.25  | 9.47  | 0.29 | 0.25 | 9.4E-03 | 2.8E-06 | Y |
| 2396009 | LZIC                          | 7.19  | 7.69  | 0.40 | 0.39 | 0       | 4.1E-11 | N |
| 2405893 | C1orf212                      | 8.30  | 8.67  | 0.30 | 0.45 | 1.0E-03 | 6.9E-07 | N |
| 2409613 | PRNPIP                        | 7.10  | 7.52  | 0.45 | 0.50 | 3.1E-03 | 5.7E-07 | N |
| 2412529 | NRD1                          | 8.49  | 8.86  | 0.38 | 0.36 | 4.0E-04 | 5.9E-09 | N |
| 2413153 | C1orf123                      | 8.56  | 8.81  | 0.31 | 0.29 | 6.4E-03 | 4.0E-06 | N |
| 2413578 | TMEM59                        | 8.97  | 9.26  | 0.35 | 0.27 | 1.3E-03 | 3.1E-07 | N |
| 2421883 | GBP1                          | 7.58  | 8.12  | 0.57 | 0.65 | 3.4E-03 | 1.6E-06 | Y |
| 2434319 | ANP32E                        | 8.56  | 8.94  | 0.42 | 0.37 | 1.2E-03 | 8.8E-08 | N |
| 2461891 | B3GALNT2                      | 7.67  | 7.84  | 0.19 | 0.21 | 9.2E-03 | 4.3E-06 | N |
| 2477302 | CCDC75                        | 8.34  | 8.70  | 0.36 | 0.43 | 2.1E-03 | 1.4E-07 | N |
| 2487412 | GMCL1 /// ANXA4               | 8.23  | 8.79  | 0.55 | 0.56 | 4.0E-04 | 8.4E-08 | N |

AJHG, Volume 82

|         |                 |       |       |      |      |         |         |   |
|---------|-----------------|-------|-------|------|------|---------|---------|---|
| 2491676 | VAMP8 /// VAMP5 | 7.96  | 8.34  | 0.39 | 0.41 | 1.6E-03 | 7.8E-08 | N |
| 2495881 | EIF5B           | 7.94  | 8.52  | 0.55 | 0.46 | 0       | 2.7E-09 | N |
| 2517408 | AGPS            | 8.16  | 8.61  | 0.43 | 0.36 | 0       | 8.2E-10 | N |
| 2519860 | ASNSD1          | 7.99  | 8.25  | 0.29 | 0.30 | 3.6E-03 | 4.8E-07 | N |
| 2540317 | PDIA6           | 11.57 | 11.80 | 0.28 | 0.22 | 1.6E-03 | 4.0E-07 | N |
| 2547716 | FAM98A          | 8.62  | 9.03  | 0.45 | 0.35 | 3.0E-04 | 2.9E-08 | N |
| 2574646 | BIN1            | 8.10  | 8.47  | 0.50 | 0.38 | 6.4E-03 | 2.5E-06 | Y |
| 2619323 | SS18L2          | 8.82  | 9.21  | 0.30 | 0.38 | 0       | 8.5E-10 | N |
| 2657025 | RTP4            | 7.61  | 7.94  | 0.35 | 0.36 | 1.8E-03 | 1.2E-07 | N |
| 2671101 | TMEM16K         | 7.19  | 7.89  | 0.87 | 0.79 | 6.0E-03 | 8.0E-07 | N |
| 2672467 | CCDC12          | 8.12  | 8.30  | 0.16 | 0.23 | 1.8E-03 | 1.2E-06 | Y |
| 2676518 | SFMBT1          | 6.71  | 6.93  | 0.26 | 0.29 | 8.4E-03 | 4.5E-06 | Y |
| 2696379 | ANAPC13         | 8.61  | 8.91  | 0.29 | 0.30 | 4.0E-04 | 5.1E-08 | N |
| 2708855 | LIPH            | 7.24  | 8.08  | 0.71 | 0.61 | 0       | 2.6E-10 | N |
| 2717049 | MRFAP1          | 8.47  | 8.85  | 0.34 | 0.27 | 0       | 2.9E-10 | N |
| 2724472 | HIP2            | 9.21  | 9.59  | 0.29 | 0.37 | 0       | 4.8E-09 | Y |
| 2730531 | SAS10           | 7.58  | 7.84  | 0.23 | 0.26 | 1.0E-04 | 3.5E-09 | N |
| 2737069 | METAP1          | 9.45  | 9.73  | 0.34 | 0.31 | 6.1E-03 | 1.1E-06 | N |
| 2750527 | KLHL2           | 6.91  | 7.20  | 0.32 | 0.34 | 3.6E-03 | 1.4E-06 | N |
| 2759303 | MRFAP1L1        | 6.59  | 7.12  | 0.56 | 0.53 | 1.0E-03 | 2.9E-08 | N |
| 2765865 | LOC253981       | 7.36  | 7.64  | 0.33 | 0.34 | 3.9E-03 | 1.5E-07 | N |
| 2772017 | YTHDC1          | 8.48  | 8.82  | 0.32 | 0.28 | 0       | 3.9E-09 | N |
| 2775965 | COQ2            | 7.93  | 8.21  | 0.34 | 0.33 | 5.4E-03 | 1.2E-06 | N |
| 2779638 | PPP3CA          | 8.01  | 8.50  | 0.62 | 0.49 | 3.0E-03 | 7.6E-07 | N |
| 2779823 | SLC39A8         | 9.23  | 9.57  | 0.38 | 0.37 | 2.8E-03 | 1.0E-06 | N |
| 2792420 | FLJ38482        | 7.01  | 7.31  | 0.39 | 0.33 | 7.6E-03 | 2.3E-06 | N |
| 2828146 | CDC42SE2        | 11.29 | 11.49 | 0.20 | 0.25 | 3.0E-03 | 6.3E-07 | N |
| 2832081 | ZMAT2           | 6.77  | 7.13  | 0.40 | 0.40 | 1.9E-03 | 2.5E-06 | N |
| 2836451 | MFAP3           | 7.05  | 7.39  | 0.39 | 0.40 | 3.6E-03 | 1.4E-07 | N |
| 2844082 | RUFY1           | 8.01  | 8.22  | 0.28 | 0.20 | 3.6E-03 | 7.1E-07 | Y |
| 2845043 | TRIM41          | 6.48  | 6.63  | 0.17 | 0.18 | 5.6E-03 | 4.0E-06 | N |
| 2860614 | CCDC125         | 6.71  | 6.98  | 0.32 | 0.33 | 6.1E-03 | 2.2E-07 | N |
| 2871685 | PGGT1B          | 7.78  | 8.19  | 0.49 | 0.40 | 1.8E-03 | 1.1E-06 | N |

## AJHG, Volume 82

|         |                       |       |       |      |      |         |         |   |
|---------|-----------------------|-------|-------|------|------|---------|---------|---|
| 2894711 | TMEM14B               | 10.71 | 10.99 | 0.23 | 0.31 | 4.0E-04 | 2.0E-08 | N |
| 2924898 | RNF146                | 7.23  | 7.54  | 0.37 | 0.35 | 3.6E-03 | 1.3E-06 | N |
| 2938972 | SERPINB1              | 7.60  | 8.31  | 0.86 | 0.75 | 3.6E-03 | 7.6E-08 | N |
| 2939014 | MGC39372              | 7.20  | 7.94  | 0.61 | 0.61 | 0       | 8.9E-12 | N |
| 2939034 | SERPINB9 /// SERPINB6 | 9.95  | 10.62 | 0.77 | 0.54 | 4.0E-04 | 3.2E-09 | N |
| 2945645 | TTRAP                 | 9.34  | 9.62  | 0.29 | 0.29 | 1.0E-03 | 2.4E-07 | N |
| 2945882 | CMAH                  | 6.43  | 7.06  | 0.50 | 0.49 | 0       | 9.2E-12 | N |
| 2946369 | HIST1H3G              | 9.01  | 9.43  | 0.55 | 0.42 | 4.0E-03 | 4.5E-07 | N |
| 2963407 | SYNCRIP               | 7.60  | 7.97  | 0.37 | 0.37 | 5.0E-04 | 2.8E-07 | N |
| 2974469 | STX7                  | 8.47  | 8.87  | 0.43 | 0.40 | 1.3E-03 | 1.5E-07 | N |
| 2975680 | BCLAF1                | 9.33  | 9.59  | 0.27 | 0.25 | 1.0E-03 | 8.0E-08 | N |
| 2977510 | FUCA2                 | 7.70  | 8.12  | 0.42 | 0.42 | 5.0E-04 | 3.8E-08 | Y |
| 3009959 | PTPN12                | 6.79  | 7.25  | 0.50 | 0.45 | 1.3E-03 | 7.0E-08 | N |
| 3014855 | ZFP95                 | 6.97  | 7.26  | 0.19 | 0.22 | 0       | 1.9E-12 | N |
| 3026988 | LUC7L2                | 8.50  | 8.90  | 0.30 | 0.27 | 0       | 3.6E-13 | N |
| 3032017 | NUB1                  | 9.05  | 9.50  | 0.39 | 0.33 | 0       | 4.1E-11 | N |
| 3042610 | SCAP2                 | 8.15  | 8.57  | 0.43 | 0.46 | 1.3E-03 | 3.5E-07 | N |
| 3088544 | ATP6V1B2              | 9.57  | 9.84  | 0.31 | 0.36 | 8.3E-03 | 4.0E-06 | N |
| 3089401 | PPP3CC                | 8.04  | 8.32  | 0.28 | 0.31 | 1.8E-03 | 1.1E-07 | Y |
| 3089740 | RHOBTB2               | 7.16  | 7.41  | 0.28 | 0.31 | 5.1E-03 | 1.0E-07 | Y |
| 3091628 | ELP3                  | 8.57  | 8.81  | 0.28 | 0.24 | 1.7E-03 | 9.6E-08 | N |
| 3095719 | GOLGA7                | 8.29  | 8.60  | 0.31 | 0.32 | 7.0E-04 | 3.1E-08 | N |
| 3096368 | HOOK3                 | 7.64  | 7.97  | 0.35 | 0.34 | 1.3E-03 | 2.6E-07 | N |
| 3107342 | PPM2C                 | 6.83  | 7.07  | 0.24 | 0.28 | 1.8E-03 | 5.4E-08 | N |
| 3111530 | ENY2                  | 7.91  | 8.23  | 0.43 | 0.36 | 7.6E-03 | 2.1E-06 | N |
| 3114365 | FAM91A2 /// FAM91A1   | 8.75  | 9.16  | 0.43 | 0.35 | 2.0E-04 | 3.6E-08 | N |
| 3114600 | TRMT12                | 6.29  | 6.61  | 0.28 | 0.30 | 1.0E-04 | 8.2E-09 | N |
| 3130161 | GSR                   | 9.53  | 9.90  | 0.28 | 0.37 | 1.0E-04 | 3.1E-09 | N |
| 3131844 | LSM1                  | 7.65  | 7.86  | 0.25 | 0.24 | 6.4E-03 | 1.8E-06 | N |
| 3133345 | SLC20A2               | 7.06  | 7.21  | 0.19 | 0.17 | 9.1E-03 | 3.3E-06 | N |
| 3133479 | RNF170                | 6.63  | 6.95  | 0.37 | 0.33 | 1.5E-03 | 2.2E-08 | N |
| 3138414 | ARMC1                 | 8.59  | 8.84  | 0.30 | 0.27 | 5.6E-03 | 2.8E-06 | N |
| 3150844 | SNTB1                 | 6.91  | 7.53  | 0.63 | 0.57 | 2.0E-04 | 5.0E-08 | Y |



AJHG, Volume 82

|         |                   |       |       |      |      |         |         |   |
|---------|-------------------|-------|-------|------|------|---------|---------|---|
| 3173748 | FAM122A           | 7.26  | 7.55  | 0.35 | 0.33 | 5.4E-03 | 1.2E-07 | N |
| 3175119 | OSTF1             | 9.32  | 9.70  | 0.29 | 0.30 | 0       | 5.5E-11 | N |
| 3212277 | C9orf64           | 7.42  | 7.77  | 0.45 | 0.39 | 6.0E-03 | 5.7E-07 | Y |
| 3214582 | SPTLC1            | 8.31  | 8.57  | 0.29 | 0.28 | 2.5E-03 | 2.9E-07 | N |
| 3227121 | C9orf78           | 7.41  | 7.65  | 0.21 | 0.24 | 1.0E-04 | 7.7E-09 | N |
| 3231774 | GTPBP4 /// IDI2   | 9.02  | 9.27  | 0.20 | 0.23 | 0       | 2.9E-09 | N |
| 3236448 | SUV39H2           | 7.15  | 7.41  | 0.29 | 0.26 | 1.4E-03 | 1.3E-07 | N |
| 3236786 | PTER              | 8.00  | 8.29  | 0.32 | 0.27 | 7.0E-04 | 2.9E-08 | N |
| 3240095 | RAB18             | 8.10  | 8.37  | 0.34 | 0.29 | 3.6E-03 | 1.3E-06 | N |
| 3243262 | HSD17B7           | 7.11  | 7.66  | 0.68 | 0.63 | 5.6E-03 | 5.2E-06 | N |
| 3243708 | BMS1LTTC7B        | 8.44  | 8.83  | 0.33 | 0.29 | 0       | 5.2E-10 | N |
| 3249587 | SIRT1             | 7.58  | 7.80  | 0.27 | 0.26 | 7.8E-03 | 1.4E-06 | N |
| 3249738 | HNRPH3            | 7.75  | 8.14  | 0.42 | 0.33 | 2.0E-04 | 1.3E-08 | N |
| 3252382 | MYST4             | 7.92  | 8.19  | 0.30 | 0.27 | 1.6E-03 | 1.5E-07 | N |
| 3252534 | SAMD8 /// VDAC2   | 8.57  | 8.87  | 0.26 | 0.22 | 0       | 7.9E-10 | N |
| 3260937 | PEO1              | 6.54  | 6.78  | 0.22 | 0.21 | 1.0E-04 | 2.8E-08 | N |
| 3264326 | ACSL5             | 8.71  | 8.93  | 0.25 | 0.23 | 1.8E-03 | 8.9E-08 | N |
| 3264948 | CASP7             | 8.32  | 8.64  | 0.36 | 0.34 | 1.8E-03 | 8.1E-08 | N |
| 3265494 | TRUB1             | 6.80  | 7.05  | 0.29 | 0.28 | 3.1E-03 | 6.1E-07 | N |
| 3269587 | C10orf137         | 8.38  | 8.71  | 0.39 | 0.40 | 5.1E-03 | 9.4E-07 | N |
| 3275132 | GDI2              | 11.91 | 12.05 | 0.12 | 0.15 | 4.0E-04 | 1.5E-07 | N |
| 3277662 | UPF2              | 7.97  | 8.22  | 0.28 | 0.25 | 1.6E-03 | 2.8E-07 | N |
| 3295032 | AP3M1             | 9.03  | 9.23  | 0.25 | 0.22 | 3.6E-03 | 9.8E-07 | N |
| 3301857 | TM9SF3            | 10.05 | 10.24 | 0.23 | 0.20 | 2.6E-03 | 3.0E-07 | N |
| 3309215 | EIF3S10 /// RPL17 | 9.32  | 9.68  | 0.36 | 0.29 | 1.0E-04 | 7.5E-09 | N |
| 3320301 | CTR9 /// TRMU     | 8.67  | 9.10  | 0.35 | 0.30 | 0       | 4.1E-12 | N |
| 3326842 | TRIM44            | 8.26  | 8.53  | 0.28 | 0.26 | 5.0E-04 | 8.6E-08 | N |
| 3345107 | ANKRD49           | 8.15  | 8.44  | 0.29 | 0.26 | 2.0E-04 | 2.6E-08 | N |
| 3345142 | FUT4 /// PIWIL4   | 6.63  | 7.01  | 0.34 | 0.48 | 2.1E-03 | 1.4E-06 | N |
| 3365525 | SPTY2D1           | 7.75  | 8.04  | 0.34 | 0.34 | 4.8E-03 | 2.7E-06 | N |
| 3368748 | FBXO3             | 7.28  | 7.54  | 0.27 | 0.26 | 7.0E-04 | 5.3E-09 | N |
| 3373724 | SSRP1             | 9.90  | 10.07 | 0.17 | 0.18 | 7.0E-04 | 1.0E-07 | N |
| 3382948 | CLNS1A            | 8.58  | 8.88  | 0.35 | 0.33 | 3.6E-03 | 1.2E-06 | N |

## AJHG, Volume 82

|         |                                |       |       |      |      |         |         |   |
|---------|--------------------------------|-------|-------|------|------|---------|---------|---|
| 3383164 | ALG8                           | 8.20  | 8.49  | 0.35 | 0.28 | 2.1E-03 | 3.3E-08 | N |
| 3392996 | KIAA0999                       | 7.05  | 7.39  | 0.40 | 0.33 | 1.6E-03 | 3.0E-08 | N |
| 3396736 | PUS3                           | 6.65  | 6.95  | 0.32 | 0.30 | 1.2E-03 | 1.3E-07 | N |
| 3404436 | CLEC2D /// NPM1                | 9.03  | 9.79  | 0.86 | 0.43 | 1.0E-04 | 7.3E-09 | N |
| 3412008 | PPHLN1                         | 8.40  | 8.74  | 0.35 | 0.28 | 1.0E-04 | 1.4E-09 | N |
| 3429754 | KIAA1033                       | 9.13  | 9.44  | 0.33 | 0.29 | 4.0E-04 | 8.1E-09 | N |
| 3429857 | LOC387882                      | 8.78  | 9.16  | 0.42 | 0.51 | 6.3E-03 | 2.3E-06 | N |
| 3430552 | PWP1                           | 9.08  | 9.25  | 0.18 | 0.18 | 1.4E-03 | 3.1E-07 | N |
| 3431318 | TCHP                           | 6.60  | 6.87  | 0.27 | 0.27 | 4.0E-04 | 6.3E-09 | N |
| 3433843 | SUDS3                          | 8.02  | 8.35  | 0.44 | 0.38 | 9.6E-03 | 3.1E-06 | N |
| 3440998 | ---                            | 7.25  | 7.57  | 0.34 | 0.27 | 2.0E-04 | 9.1E-09 | N |
| 3441955 | MRPL51                         | 10.24 | 10.46 | 0.24 | 0.25 | 3.6E-03 | 1.9E-06 | Y |
| 3442427 | MBOAT5                         | 9.02  | 9.33  | 0.31 | 0.29 | 2.0E-04 | 3.2E-08 | N |
| 3443296 | M6PR                           | 10.89 | 11.09 | 0.18 | 0.19 | 1.0E-04 | 8.4E-09 | N |
| 3447129 | KIAA0528                       | 7.57  | 7.83  | 0.31 | 0.31 | 5.9E-03 | 5.2E-07 | Y |
| 3447863 | KRAS                           | 7.57  | 8.09  | 0.47 | 0.44 | 0       | 1.4E-09 | N |
| 3458551 | ARHGAP9                        | 8.37  | 8.62  | 0.33 | 0.26 | 3.8E-03 | 2.4E-07 | Y |
| 3464000 | CCDC59                         | 7.82  | 8.22  | 0.44 | 0.46 | 3.6E-03 | 1.0E-06 | N |
| 3470549 | CORO1C                         | 10.74 | 10.96 | 0.27 | 0.20 | 1.5E-03 | 6.7E-07 | N |
| 3471374 | PPP1CC                         | 10.72 | 10.98 | 0.22 | 0.22 | 0       | 7.6E-10 | N |
| 3473802 | TAOK3                          | 8.80  | 9.04  | 0.32 | 0.27 | 7.9E-03 | 2.6E-06 | N |
| 3476130 | SBNO1                          | 8.71  | 8.91  | 0.24 | 0.24 | 5.8E-03 | 2.7E-06 | N |
| 3489708 | DLEU1 /// SPANXC               | 6.90  | 7.19  | 0.36 | 0.30 | 3.1E-03 | 2.8E-06 | Y |
| 3490504 | UTP14A /// ALG11 ///<br>UTP14C | 6.91  | 7.19  | 0.36 | 0.32 | 8.5E-03 | 3.5E-07 | N |
| 3503224 | UPF3A                          | 7.45  | 7.88  | 0.43 | 0.41 | 4.0E-04 | 1.3E-08 | N |
| 3503976 | PSPC1                          | 8.34  | 8.69  | 0.26 | 0.24 | 0       | 2.2E-12 | N |
| 3504392 | LOC221143                      | 7.17  | 7.43  | 0.28 | 0.35 | 7.9E-03 | 2.2E-06 | N |
| 3511031 | ELF1                           | 10.24 | 10.44 | 0.24 | 0.19 | 1.6E-03 | 4.0E-07 | N |
| 3515009 | VPS36                          | 7.74  | 8.01  | 0.31 | 0.33 | 4.0E-03 | 1.1E-07 | N |
| 3518977 | C13orf7                        | 7.86  | 8.13  | 0.36 | 0.28 | 4.6E-03 | 8.5E-07 | N |
| 3528115 | C14orf92                       | 8.64  | 8.91  | 0.22 | 0.18 | 0       | 1.0E-11 | N |
| 3529156 | NGDN                           | 7.25  | 7.62  | 0.32 | 0.32 | 0       | 8.7E-10 | N |

## AJHG, Volume 82

|         |                        |       |       |      |      |         |         |   |
|---------|------------------------|-------|-------|------|------|---------|---------|---|
| 3536905 | KTN1 /// PDIA6         | 8.17  | 8.53  | 0.44 | 0.39 | 3.7E-03 | 8.4E-08 | N |
| 3540007 | MTHFD1                 | 10.13 | 10.28 | 0.18 | 0.18 | 6.5E-03 | 7.7E-07 | N |
| 3545525 | C14orf156              | 10.88 | 11.13 | 0.27 | 0.26 | 1.0E-03 | 3.1E-08 | Y |
| 3549220 | C14orf130              | 8.03  | 8.32  | 0.36 | 0.35 | 8.4E-03 | 2.5E-06 | N |
| 3553607 | SNORA28 /// EIF5       | 8.91  | 9.15  | 0.28 | 0.31 | 7.0E-03 | 3.1E-06 | N |
| 3555461 | OSGEP                  | 7.78  | 8.11  | 0.26 | 0.27 | 0       | 1.1E-09 | N |
| 3556323 | SUPT16H                | 9.88  | 10.11 | 0.23 | 0.16 | 0       | 2.0E-09 | N |
| 3556966 | C14orf94               | 9.05  | 9.30  | 0.29 | 0.26 | 1.8E-03 | 3.1E-07 | N |
| 3557947 | CHMP4A /// MDP-1       | 7.72  | 7.91  | 0.23 | 0.21 | 7.6E-03 | 2.3E-06 | N |
| 3561321 | MBIP                   | 7.96  | 8.18  | 0.28 | 0.23 | 3.7E-03 | 1.2E-07 | N |
| 3562003 | TRAPPC6B               | 8.05  | 8.30  | 0.27 | 0.27 | 1.8E-03 | 2.9E-07 | N |
| 3568108 | SGPP1                  | 8.40  | 8.66  | 0.34 | 0.25 | 5.7E-03 | 1.4E-06 | N |
| 3568667 | MAX                    | 6.80  | 7.08  | 0.30 | 0.32 | 2.8E-03 | 1.2E-07 | N |
| 3570049 | ERH                    | 9.90  | 10.29 | 0.38 | 0.48 | 2.1E-03 | 1.1E-06 | N |
| 3571347 | NUMB                   | 8.76  | 9.02  | 0.32 | 0.29 | 4.7E-03 | 9.5E-08 | N |
| 3573152 | SPTLC2                 | 8.65  | 9.03  | 0.31 | 0.29 | 0       | 1.2E-09 | Y |
| 3573261 | SNW1                   | 8.34  | 8.61  | 0.36 | 0.28 | 6.3E-03 | 1.9E-06 | Y |
| 3573994 | TRIO                   | 6.78  | 7.17  | 0.45 | 0.39 | 1.5E-03 | 8.0E-08 | N |
| 3590014 | CASC5                  | 7.61  | 7.87  | 0.33 | 0.30 | 9.7E-03 | 8.4E-07 | Y |
| 3590341 | CHP                    | 9.96  | 10.13 | 0.19 | 0.18 | 1.2E-03 | 4.3E-07 | N |
| 3590422 | RTF1                   | 7.91  | 8.14  | 0.25 | 0.24 | 1.3E-03 | 5.4E-08 | N |
| 3591400 | 76P                    | 7.94  | 8.23  | 0.30 | 0.29 | 5.0E-04 | 3.3E-08 | N |
| 3597977 | TRIP4                  | 7.37  | 7.65  | 0.23 | 0.23 | 0       | 4.3E-09 | N |
| 3603408 | PSMA4                  | 10.30 | 10.60 | 0.30 | 0.27 | 1.0E-04 | 2.5E-09 | N |
| 3619991 | NDUFAF1                | 7.96  | 8.32  | 0.40 | 0.32 | 4.0E-04 | 1.5E-08 | N |
| 3621692 | MFAP1                  | 7.21  | 7.88  | 0.46 | 0.34 | 0       | 5.1E-15 | Y |
| 3624362 | LEO1                   | 7.75  | 8.16  | 0.36 | 0.33 | 0       | 2.5E-11 | N |
| 3629761 | LOC652499 /// C15orf44 | 8.49  | 8.71  | 0.25 | 0.25 | 5.5E-03 | 1.8E-06 | N |
| 3650802 | COQ7                   | 6.60  | 6.84  | 0.30 | 0.27 | 4.8E-03 | 1.6E-06 | Y |
| 3656904 | FUS                    | 9.91  | 10.15 | 0.21 | 0.29 | 1.3E-03 | 2.6E-07 | N |
| 3665116 | CBFB                   | 9.54  | 9.82  | 0.28 | 0.20 | 0       | 2.0E-11 | N |
| 3666732 | CYB5B                  | 11.25 | 11.46 | 0.24 | 0.25 | 3.6E-03 | 1.7E-06 | N |
| 3668617 | PSMD7                  | 9.36  | 9.60  | 0.27 | 0.27 | 2.5E-03 | 4.8E-08 | Y |

AJHG, Volume 82

|         |                  |       |       |      |      |         |         |   |
|---------|------------------|-------|-------|------|------|---------|---------|---|
| 3680610 | GSPT1            | 9.71  | 9.96  | 0.26 | 0.25 | 7.0E-04 | 1.1E-07 | N |
| 3681705 | RRN3             | 9.00  | 9.26  | 0.22 | 0.26 | 1.0E-04 | 3.3E-09 | Y |
| 3687342 | HIRIP3           | 6.40  | 6.62  | 0.20 | 0.20 | 1.0E-04 | 2.3E-09 | N |
| 3697799 | APIG1            | 9.60  | 9.81  | 0.22 | 0.21 | 7.0E-04 | 3.5E-08 | N |
| 3699581 | TMEM170          | 7.81  | 8.03  | 0.23 | 0.20 | 2.0E-04 | 1.2E-09 | N |
| 3701384 | C16orf61         | 9.03  | 9.35  | 0.24 | 0.27 | 0       | 5.2E-11 | N |
| 3708462 | CENTB1           | 8.55  | 8.74  | 0.23 | 0.22 | 3.9E-03 | 4.3E-07 | N |
| 3716337 | CCDC55           | 6.99  | 7.44  | 0.34 | 0.32 | 0       | 5.7E-13 | N |
| 3718382 | CCDC16           | 7.63  | 7.88  | 0.28 | 0.28 | 3.7E-03 | 2.2E-06 | N |
| 3718791 | TAF15            | 8.57  | 8.96  | 0.37 | 0.36 | 1.0E-04 | 2.2E-08 | N |
| 3724858 | TBX21            | 6.70  | 7.34  | 0.51 | 0.53 | 0       | 5.9E-12 | N |
| 3727712 | PCTP             | 6.76  | 7.16  | 0.32 | 0.35 | 0       | 3.3E-10 | N |
| 3740304 | PITPNA /// MYO1C | 9.24  | 9.54  | 0.33 | 0.29 | 1.2E-03 | 1.5E-07 | N |
| 3747522 | TNFRSF13B        | 8.80  | 9.16  | 0.39 | 0.30 | 2.0E-04 | 1.4E-08 | N |
| 3755714 | PPARBP           | 8.40  | 8.67  | 0.26 | 0.25 | 1.0E-04 | 1.6E-09 | N |
| 3755862 | IKZF3            | 10.55 | 10.76 | 0.24 | 0.18 | 1.3E-03 | 8.3E-07 | N |
| 3757487 | DNAJC7           | 9.23  | 9.42  | 0.15 | 0.18 | 0       | 1.9E-09 | N |
| 3757970 | PSMC3IP          | 7.18  | 7.47  | 0.37 | 0.32 | 6.4E-03 | 1.7E-06 | N |
| 3759186 | GPATC8           | 8.06  | 8.26  | 0.26 | 0.23 | 8.5E-03 | 6.9E-07 | N |
| 3763656 | TRIM25           | 9.34  | 9.73  | 0.32 | 0.23 | 0       | 1.3E-13 | N |
| 3763687 | COIL             | 7.67  | 8.04  | 0.24 | 0.27 | 0       | 1.8E-12 | N |
| 3764384 | SUPT4H1          | 8.58  | 8.89  | 0.27 | 0.28 | 1.0E-04 | 7.1E-09 | N |
| 3764738 | FAM33A           | 9.72  | 10.14 | 0.32 | 0.26 | 0       | 2.6E-12 | Y |
| 3765059 | ABC1             | 6.87  | 7.14  | 0.33 | 0.31 | 9.6E-03 | 3.6E-06 | Y |
| 3766334 | CCDC47           | 8.75  | 9.02  | 0.32 | 0.28 | 2.6E-03 | 3.5E-07 | N |
| 3766373 | FTSJ3            | 8.32  | 8.64  | 0.26 | 0.26 | 0       | 1.2E-09 | N |
| 3772719 | LGALS3BP         | 6.93  | 7.55  | 0.48 | 0.84 | 2.2E-03 | 5.4E-07 | N |
| 3774823 | CSNK1D           | 9.29  | 9.47  | 0.20 | 0.21 | 3.1E-03 | 1.4E-06 | N |
| 3781082 | SNRPD1           | 7.23  | 7.59  | 0.39 | 0.37 | 1.4E-03 | 9.4E-08 | N |
| 3795942 | YES1             | 7.20  | 7.61  | 0.50 | 0.49 | 5.9E-03 | 1.9E-06 | N |
| 3799415 | AFG3L2           | 8.93  | 9.17  | 0.27 | 0.27 | 3.4E-03 | 7.8E-07 | Y |
| 3802129 | SS18             | 8.73  | 9.16  | 0.33 | 0.33 | 0       | 1.6E-11 | N |
| 3811459 | FVT1             | 8.13  | 8.44  | 0.36 | 0.33 | 2.1E-03 | 6.0E-07 | N |

|         |                           |       |       |      |      |         |         |   |
|---------|---------------------------|-------|-------|------|------|---------|---------|---|
| 3828162 | C19orf2                   | 8.91  | 9.19  | 0.30 | 0.24 | 2.0E-04 | 1.9E-08 | N |
| 3857811 | C19orf12 /// LOC650006    | 7.27  | 7.48  | 0.23 | 0.22 | 1.3E-03 | 1.4E-07 | N |
| 3861978 | PAF1                      | 8.40  | 8.59  | 0.23 | 0.21 | 3.8E-03 | 3.9E-07 | N |
| 3872983 | CHMP2A                    | 10.24 | 10.49 | 0.23 | 0.25 | 2.0E-04 | 8.7E-08 | N |
| 3878429 | POLR3F                    | 6.52  | 6.80  | 0.31 | 0.30 | 1.3E-03 | 1.6E-08 | N |
| 3884324 | CTNBL1                    | 7.90  | 8.08  | 0.14 | 0.16 | 0       | 2.3E-10 | Y |
| 3890218 | RP5-1153D9.3 /// C20orf43 | 8.67  | 8.94  | 0.32 | 0.28 | 2.7E-03 | 1.5E-06 | N |
| 3896370 | RP5-1022P6.2              | 8.98  | 9.31  | 0.41 | 0.35 | 5.3E-03 | 1.6E-06 | N |
| 3896524 | CGI-09                    | 8.01  | 8.16  | 0.18 | 0.18 | 6.4E-03 | 8.8E-07 | N |
| 3909395 | DPM1                      | 8.73  | 9.07  | 0.41 | 0.40 | 6.5E-03 | 6.3E-07 | N |
| 3933817 | WDR4                      | 7.70  | 7.96  | 0.32 | 0.27 | 3.7E-03 | 1.8E-06 | N |
| 3949017 | FLJ20699                  | 7.45  | 7.77  | 0.24 | 0.34 | 1.0E-04 | 3.9E-08 | Y |
| 3956290 | PITPNB                    | 8.68  | 9.01  | 0.41 | 0.40 | 7.3E-03 | 2.7E-06 | N |
| 3959918 | TST                       | 7.44  | 7.80  | 0.43 | 0.44 | 9.1E-03 | 4.9E-06 | N |
| 3970833 | PDHA1                     | 9.08  | 9.25  | 0.21 | 0.18 | 3.7E-03 | 1.2E-06 | N |
| 3982242 | CXorf26                   | 7.53  | 7.76  | 0.24 | 0.23 | 6.0E-04 | 2.5E-08 | N |
| 3983105 | FAM121A                   | 7.56  | 7.85  | 0.36 | 0.29 | 2.5E-03 | 1.8E-07 | N |
| 3986514 | PRPS1                     | 9.16  | 9.38  | 0.29 | 0.26 | 7.6E-03 | 2.6E-06 | N |
| 3994100 | FMR1                      | 7.06  | 7.34  | 0.34 | 0.31 | 3.7E-03 | 7.4E-07 | Y |
| 3996667 | SNORA36A /// DKC1 ///N    | 8.78  | 8.97  | 0.25 | 0.21 | 7.6E-03 | 3.7E-06 | N |
| 3996755 | ---                       | 7.59  | 7.82  | 0.26 | 0.21 | 1.0E-03 | 2.1E-08 | N |
| 4002741 | ACOT9 /// NOMO3           | 7.25  | 7.72  | 0.39 | 0.34 | 0       | 5.4E-11 | Y |
| 4006416 | FUNDC1                    | 7.86  | 8.17  | 0.35 | 0.32 | 1.2E-03 | 2.8E-08 | N |
| 4011989 | CXCR3                     | 7.37  | 8.02  | 0.62 | 0.55 | 1.0E-04 | 5.7E-09 | N |
| 4015838 | ARMCX6                    | 8.05  | 8.21  | 0.18 | 0.20 | 3.6E-03 | 1.5E-06 | N |
| 4021469 | PDCD8                     | 7.50  | 7.87  | 0.44 | 0.39 | 2.3E-03 | 5.9E-07 | N |
| 4043943 | INPP5B /// SF3A3          | 9.13  | 9.41  | 0.30 | 0.29 | 7.0E-04 | 5.3E-08 | N |

<sup>a</sup> denotes the average expression level of genes ( $\log_2$  transformed).

<sup>b</sup> denotes the standard deviation of expression level of genes.

<sup>c</sup> denotes the one-sided permutation-adjusted p values.

<sup>d</sup> denotes the p values using a general linear model.

<sup>e</sup> indicates copy-number variations reported; Y:yes, N:no.

**Table S2. 3,136 Transcript Clusters Were Differentially Expressed between the CEU and YRI Samples (QVALUE  $P_c < 0.01$ )**

| <i>Affymetrix<br/>Transcript<br/>Cluster ID</i> | <i>Gene<br/>Symbol</i> | <i>M(CEU)<sup>a</sup></i> | <i>M(YRI)<sup>a</sup></i> | <i>S(CEU)<sup>b</sup></i> | <i>S(YRI)<sup>b</sup></i> | <i>P(GLM)<sup>c</sup></i> | <i>QVALUE<sup>d</sup></i> |
|-------------------------------------------------|------------------------|---------------------------|---------------------------|---------------------------|---------------------------|---------------------------|---------------------------|
| 2946215                                         | HIST1H3B               | 8.48                      | 7.48                      | 1.14                      | 0.77                      | 1.6E-07                   | 2.5E-06                   |
| 3062868                                         | BAIAP2L1               | 7.94                      | 6.99                      | 1.02                      | 0.89                      | 5.3E-08                   | 1.2E-06                   |
| 2939232                                         | TUBB2A                 | 7.61                      | 6.68                      | 1.00                      | 0.67                      | 1.8E-07                   | 2.8E-06                   |
| 3848492                                         | FCER2                  | 11.06                     | 10.22                     | 0.46                      | 0.78                      | 3.8E-11                   | 4.8E-09                   |
| 2927722                                         | HEBP2                  | 8.52                      | 7.77                      | 0.47                      | 0.65                      | 2.2E-10                   | 1.9E-08                   |
| 3065546                                         | FLJ36166               | 7.29                      | 6.59                      | 0.49                      | 0.73                      | 9.5E-09                   | 3.1E-07                   |
| 3756319                                         | CCR7                   | 9.51                      | 8.82                      | 0.85                      | 0.73                      | 4.2E-06                   | 3.0E-05                   |
| 2711034                                         | C3orf59                | 9.14                      | 8.45                      | 0.82                      | 1.30                      | 7.8E-04                   | 1.4E-03                   |
| 2576554                                         | LOC65378               | 8.48                      | 7.79                      | 0.33                      | 0.56                      | 2.5E-11                   | 3.4E-09                   |
| 3181240                                         | TMOD1                  | 8.06                      | 7.38                      | 0.65                      | 0.57                      | 6.6E-09                   | 2.4E-07                   |
| 2725013                                         | UCHL1                  | 8.55                      | 7.96                      | 0.94                      | 1.00                      | 1.2E-04                   | 3.6E-04                   |
| 3326635                                         | CD44                   | 10.52                     | 9.95                      | 0.58                      | 0.62                      | 4.7E-08                   | 1.1E-06                   |
| 2865050                                         | LOC65365               | 8.71                      | 8.15                      | 0.49                      | 0.38                      | 8.0E-10                   | 5.2E-08                   |
| 2377283                                         | CR2                    | 8.91                      | 8.35                      | 0.87                      | 0.83                      | 7.8E-05                   | 2.6E-04                   |
| 3447694                                         | BCAT1                  | 8.76                      | 8.22                      | 0.79                      | 0.69                      | 1.9E-05                   | 8.7E-05                   |
| 3662687                                         | CCL22                  | 10.75                     | 10.21                     | 0.88                      | 0.79                      | 1.3E-04                   | 3.9E-04                   |
| 3935232                                         | C21orf56               | 7.75                      | 7.21                      | 0.35                      | 0.40                      | 2.9E-11                   | 3.7E-09                   |
| 3091077                                         | DPYSL2                 | 8.70                      | 8.16                      | 0.52                      | 0.52                      | 7.9E-09                   | 2.8E-07                   |
| 3726569                                         | SPATA20                | 7.59                      | 7.07                      | 0.51                      | 0.44                      | 5.9E-08                   | 1.3E-06                   |
| 2427791                                         | DENND2D                | 9.44                      | 8.92                      | 0.71                      | 0.62                      | 1.5E-05                   | 7.5E-05                   |
| 2830861                                         | EGR1                   | 8.21                      | 7.70                      | 0.55                      | 0.53                      | 2.4E-07                   | 3.6E-06                   |
| 3299504                                         | ACTA2                  | 8.01                      | 7.50                      | 0.45                      | 0.37                      | 2.4E-10                   | 1.9E-08                   |
| 2883440                                         | ADAM19                 | 7.76                      | 7.25                      | 0.84                      | 0.68                      | 8.6E-05                   | 2.7E-04                   |
| 4044363                                         | CNR2                   | 7.79                      | 7.28                      | 0.56                      | 0.61                      | 1.0E-06                   | 1.1E-05                   |
| 2565902                                         | ENSESTT0               | 7.31                      | 6.81                      | 0.49                      | 0.71                      | 1.9E-05                   | 8.7E-05                   |
| 2829171                                         | TCF7                   | 7.93                      | 7.43                      | 0.60                      | 0.49                      | 9.8E-07                   | 1.0E-05                   |
| 3016636                                         | APS                    | 8.70                      | 8.22                      | 0.52                      | 0.64                      | 1.3E-06                   | 1.3E-05                   |
| 3757602                                         | GCN5L2                 | 7.96                      | 7.50                      | 0.35                      | 0.31                      | 2.5E-11                   | 3.4E-09                   |

## AJHG, Volume 82

|         |          |       |       |      |      |         |         |
|---------|----------|-------|-------|------|------|---------|---------|
| 3303165 | DNMBP    | 8.10  | 7.65  | 0.68 | 0.76 | 3.1E-04 | 7.2E-04 |
| 3022814 | HIG2     | 7.73  | 7.28  | 0.75 | 0.77 | 5.4E-04 | 1.1E-03 |
| 3402506 | TNFRSF7  | 10.94 | 10.51 | 0.47 | 0.76 | 5.4E-05 | 1.9E-04 |
| 3996467 | PLXNA3   | 7.39  | 6.96  | 0.20 | 0.18 | 0.0E+00 | 0.0E+00 |
| 2766262 | TLR6     | 7.76  | 7.33  | 0.52 | 0.46 | 1.6E-06 | 1.5E-05 |
| 3023318 | TSPAN33  | 9.54  | 9.11  | 0.46 | 0.39 | 4.1E-07 | 5.4E-06 |
| 3639406 | LOC40045 | 7.85  | 7.43  | 0.64 | 0.52 | 1.1E-04 | 3.4E-04 |
| 3512948 | LOC65381 | 7.75  | 7.32  | 1.05 | 0.99 | 7.7E-03 | 7.9E-03 |
| 3945684 | RP4-742C | 7.23  | 6.81  | 0.51 | 0.55 | 4.1E-06 | 2.9E-05 |
| 3452818 | VDR      | 6.96  | 6.54  | 0.53 | 0.47 | 1.4E-06 | 1.3E-05 |
| 2594535 | PPIL3    | 7.72  | 7.31  | 0.53 | 0.61 | 5.4E-05 | 1.9E-04 |
| 4027813 | F8A1     | 8.99  | 8.58  | 0.32 | 0.29 | 2.1E-11 | 3.4E-09 |
| 2796338 | MGC24125 | 7.41  | 7.00  | 0.71 | 0.64 | 1.6E-04 | 4.4E-04 |
| 2515240 | CYBRD1   | 9.05  | 8.64  | 0.58 | 0.63 | 3.3E-04 | 7.5E-04 |
| 3903836 | ITGB4BP  | 9.06  | 8.66  | 0.30 | 0.33 | 7.1E-11 | 6.7E-09 |
| 3159946 | SMARCA2  | 9.14  | 8.74  | 0.56 | 0.50 | 1.1E-05 | 6.1E-05 |
| 3676300 | LOC91561 | 9.19  | 8.79  | 0.56 | 0.39 | 1.8E-05 | 8.4E-05 |
| 2823880 | CAMK4    | 8.53  | 8.14  | 0.44 | 0.53 | 1.5E-05 | 7.6E-05 |
| 3544525 | FOS      | 6.90  | 6.51  | 0.50 | 0.47 | 7.5E-06 | 4.4E-05 |
| 3766621 | ICAM2    | 8.73  | 8.35  | 0.44 | 0.58 | 1.0E-04 | 3.1E-04 |
| 2646125 | CHST2    | 8.23  | 7.85  | 0.65 | 0.64 | 5.5E-04 | 1.1E-03 |
| 3821893 | JUNB     | 9.52  | 9.13  | 0.43 | 0.36 | 8.9E-07 | 9.5E-06 |
| 2693014 | LOC38839 | 8.49  | 8.11  | 0.82 | 0.87 | 3.8E-03 | 4.7E-03 |
| 2900051 | HIST1H3H | 9.13  | 8.76  | 0.48 | 0.55 | 2.0E-04 | 5.2E-04 |
| 2688605 | GCET2    | 9.51  | 9.15  | 0.61 | 0.74 | 9.5E-04 | 1.7E-03 |
| 3223738 | TRAF1    | 9.58  | 9.22  | 0.51 | 0.49 | 1.1E-04 | 3.4E-04 |
| 3230811 | DPP7     | 9.22  | 8.86  | 0.29 | 0.27 | 6.4E-10 | 4.5E-08 |
| 3225096 | NR6A1    | 7.02  | 6.66  | 0.32 | 0.38 | 7.0E-08 | 1.5E-06 |
| 3518086 | TBC1D4   | 7.87  | 7.51  | 0.53 | 0.52 | 1.6E-04 | 4.3E-04 |
| 3885537 | PLCG1    | 8.53  | 8.17  | 0.28 | 0.35 | 5.7E-10 | 4.1E-08 |
| 3315024 | ADAM8    | 8.43  | 8.07  | 0.34 | 0.31 | 2.7E-09 | 1.2E-07 |
| 3452743 | HDAC7A   | 7.42  | 7.06  | 0.49 | 0.41 | 4.2E-06 | 3.0E-05 |
| 2327677 | EPB41    | 8.18  | 7.83  | 0.53 | 0.57 | 1.1E-04 | 3.3E-04 |



## AJHG, Volume 82

|         |          |       |       |      |      |         |         |
|---------|----------|-------|-------|------|------|---------|---------|
| 2458921 | ITPKB    | 7.73  | 7.37  | 0.44 | 0.40 | 2.6E-07 | 3.8E-06 |
| 2766893 | APBB2    | 7.72  | 7.37  | 0.61 | 0.59 | 4.5E-04 | 9.6E-04 |
| 3950452 | CRELD2   | 8.42  | 8.07  | 0.43 | 0.37 | 7.1E-06 | 4.3E-05 |
| 3450775 | KIF21A   | 7.56  | 7.21  | 0.44 | 0.61 | 4.3E-05 | 1.6E-04 |
| 3470523 | SELPLG   | 7.93  | 7.58  | 0.57 | 0.62 | 4.8E-04 | 1.0E-03 |
| 2906824 | FOXP4    | 8.15  | 7.80  | 0.38 | 0.36 | 7.0E-07 | 7.9E-06 |
| 2560141 | FLJ14397 | 9.83  | 9.48  | 0.33 | 0.36 | 1.1E-07 | 1.9E-06 |
| 3177880 | DAPK1    | 8.91  | 8.56  | 0.74 | 0.60 | 2.2E-03 | 3.1E-03 |
| 3089360 | SLC39A14 | 8.21  | 7.87  | 0.34 | 0.37 | 2.1E-07 | 3.2E-06 |
| 3822849 | FLJ45910 | 9.22  | 8.88  | 0.48 | 0.44 | 6.7E-05 | 2.3E-04 |
| 2950145 | HLA-DOB  | 8.68  | 8.34  | 0.63 | 0.67 | 1.3E-03 | 2.1E-03 |
| 2766492 | LOC20189 | 9.26  | 8.92  | 0.70 | 0.78 | 5.6E-03 | 6.3E-03 |
| 3839103 | ATF5     | 8.38  | 8.04  | 0.64 | 0.65 | 3.3E-03 | 4.2E-03 |
| 3824427 | BCNP1    | 7.09  | 6.76  | 0.56 | 0.53 | 2.3E-04 | 5.8E-04 |
| 3115008 | TRIB1    | 8.30  | 7.97  | 0.51 | 0.40 | 5.3E-05 | 1.9E-04 |
| 2581349 | CACNB4   | 7.54  | 7.21  | 0.65 | 0.63 | 1.0E-03 | 1.7E-03 |
| 3634811 | CTSH     | 10.62 | 10.29 | 0.40 | 0.46 | 3.5E-05 | 1.4E-04 |
| 3188656 | LHX2     | 6.86  | 6.53  | 0.62 | 0.48 | 6.0E-04 | 1.2E-03 |
| 2360257 | IL6R     | 7.16  | 6.83  | 0.56 | 0.55 | 3.0E-04 | 7.1E-04 |
| 3903361 | AHCY     | 9.94  | 9.62  | 0.28 | 0.30 | 3.9E-08 | 9.1E-07 |
| 3453837 | TUBA3    | 7.56  | 7.24  | 0.53 | 0.52 | 4.2E-04 | 9.2E-04 |
| 3127745 | TNFRSF10 | 7.16  | 6.85  | 0.52 | 0.36 | 4.6E-05 | 1.7E-04 |
| 2946681 | H2BFS    | 7.34  | 7.03  | 0.63 | 0.66 | 5.1E-03 | 5.8E-03 |
| 2379314 | FLJ12505 | 7.94  | 7.63  | 0.55 | 0.44 | 6.6E-04 | 1.3E-03 |
| 2636125 | CD200    | 8.20  | 7.89  | 0.70 | 0.62 | 2.2E-03 | 3.1E-03 |
| 3195344 | MRPL41   | 8.31  | 8.00  | 0.47 | 0.60 | 6.1E-03 | 6.6E-03 |
| 2904946 | MAPK13   | 6.67  | 6.36  | 0.55 | 0.31 | 7.3E-05 | 2.4E-04 |
| 2484752 | LOC38812 | 9.50  | 9.20  | 0.35 | 0.37 | 6.3E-06 | 3.9E-05 |
| 3361381 | CYB5R2   | 7.11  | 6.81  | 0.69 | 0.59 | 6.5E-03 | 7.0E-03 |
| 2341663 | CTH      | 7.85  | 7.54  | 0.58 | 0.70 | 4.6E-03 | 5.4E-03 |
| 3866094 | PTGIR    | 7.20  | 6.90  | 0.46 | 0.43 | 1.3E-04 | 3.9E-04 |
| 3871504 | ISOC2    | 8.30  | 7.99  | 0.45 | 0.35 | 2.7E-05 | 1.2E-04 |
| 3362263 | RAB6IP1  | 8.45  | 8.15  | 0.71 | 0.59 | 5.4E-03 | 6.1E-03 |

## AJHG, Volume 82

|         |          |       |       |      |      |         |         |
|---------|----------|-------|-------|------|------|---------|---------|
| 2329266 | FLJ25476 | 7.10  | 6.79  | 0.40 | 0.44 | 1.7E-05 | 8.2E-05 |
| 3832978 | ZFP36    | 8.49  | 8.18  | 0.46 | 0.29 | 2.3E-05 | 1.0E-04 |
| 3119945 | GRINA    | 8.86  | 8.55  | 0.35 | 0.32 | 4.1E-06 | 2.9E-05 |
| 3358425 | LRDD     | 7.62  | 7.31  | 0.21 | 0.21 | 1.4E-11 | 2.7E-09 |
| 3013255 | PEG10    | 8.50  | 8.20  | 0.47 | 0.57 | 4.8E-04 | 1.0E-03 |
| 2360206 | ATP8B2   | 8.01  | 7.71  | 0.41 | 0.52 | 1.1E-04 | 3.3E-04 |
| 2713111 | MFI2     | 7.68  | 7.38  | 0.38 | 0.38 | 6.8E-06 | 4.2E-05 |
| 3817380 | EBI3     | 9.70  | 9.40  | 0.54 | 0.49 | 9.0E-04 | 1.6E-03 |
| 3662774 | LOC65409 | 8.34  | 8.04  | 0.64 | 0.60 | 3.9E-03 | 4.8E-03 |
| 3014227 | BHLHB8   | 7.21  | 6.91  | 0.53 | 0.54 | 5.4E-04 | 1.1E-03 |
| 3657041 | ITGAX    | 7.14  | 6.85  | 0.63 | 0.60 | 4.1E-03 | 5.0E-03 |
| 2878074 | NRG2     | 7.18  | 6.89  | 0.52 | 0.39 | 5.5E-04 | 1.1E-03 |
| 2950629 | TAPBP    | 10.85 | 10.55 | 0.24 | 0.37 | 1.8E-06 | 1.6E-05 |
| 3712098 | C17orf45 | 11.21 | 10.91 | 0.25 | 0.26 | 1.6E-08 | 4.7E-07 |
| 3682445 | LOC64743 | 7.21  | 6.91  | 0.61 | 0.53 | 2.9E-03 | 3.8E-03 |
| 3668834 | ZNRF1    | 7.33  | 7.04  | 0.31 | 0.31 | 4.1E-07 | 5.4E-06 |
| 3830993 | HCST     | 8.84  | 8.55  | 0.54 | 0.56 | 1.3E-03 | 2.1E-03 |
| 2320683 | TNFRSF8  | 8.90  | 8.60  | 0.38 | 0.36 | 3.2E-06 | 2.4E-05 |
| 3382061 | XRRA1    | 7.08  | 6.79  | 0.34 | 0.35 | 2.6E-05 | 1.1E-04 |
| 2532021 | LOC44145 | 7.74  | 7.45  | 0.28 | 0.27 | 8.6E-08 | 1.7E-06 |
| 2694675 | HIFX     | 7.92  | 7.63  | 0.29 | 0.33 | 3.5E-07 | 4.7E-06 |
| 3654227 | IL21R    | 9.35  | 9.06  | 0.37 | 0.43 | 7.0E-05 | 2.4E-04 |
| 3726960 | NME2     | 9.49  | 9.20  | 0.37 | 0.37 | 1.6E-05 | 7.7E-05 |
| 3893642 | LIME1    | 7.88  | 7.59  | 0.34 | 0.28 | 3.2E-07 | 4.4E-06 |
| 3561039 | NFKBIA   | 10.89 | 10.61 | 0.36 | 0.38 | 6.6E-05 | 2.3E-04 |
| 3590275 | CHAC1    | 8.03  | 7.74  | 0.52 | 0.57 | 1.6E-03 | 2.4E-03 |
| 3708644 | FGF11    | 7.11  | 6.83  | 0.42 | 0.40 | 8.9E-05 | 2.8E-04 |
| 3535628 | GNG2     | 9.67  | 9.39  | 0.42 | 0.42 | 2.4E-04 | 6.0E-04 |
| 3816611 | THOP1    | 8.49  | 8.21  | 0.24 | 0.30 | 1.4E-07 | 2.4E-06 |
| 3337918 | TPCN2    | 7.80  | 7.52  | 0.25 | 0.32 | 8.1E-08 | 1.6E-06 |
| 2867873 | ELL2     | 8.84  | 8.56  | 0.58 | 0.56 | 2.5E-04 | 6.2E-04 |
| 2988726 | FSCN1    | 10.87 | 10.59 | 0.45 | 0.42 | 4.9E-04 | 1.0E-03 |
| 2461531 | IRF2BP2  | 9.27  | 8.99  | 0.35 | 0.40 | 1.7E-05 | 8.4E-05 |

## AJHG, Volume 82

|         |          |       |       |      |      |         |         |
|---------|----------|-------|-------|------|------|---------|---------|
| 3837464 | GLTSCR2  | 9.18  | 8.90  | 0.23 | 0.21 | 6.9E-11 | 6.7E-09 |
| 2676182 | NT5DC2   | 8.80  | 8.52  | 0.54 | 0.40 | 8.9E-04 | 1.6E-03 |
| 3647993 | CIITA    | 8.76  | 8.48  | 0.41 | 0.45 | 6.2E-05 | 2.2E-04 |
| 3820443 | ICAM1    | 10.25 | 9.97  | 0.31 | 0.36 | 1.3E-05 | 6.8E-05 |
| 2897899 | SOX4     | 7.89  | 7.62  | 0.21 | 0.25 | 3.2E-09 | 1.4E-07 |
| 3261643 | NFKB2    | 9.89  | 9.62  | 0.26 | 0.31 | 4.7E-07 | 5.9E-06 |
| 2905169 | CDKN1A   | 8.62  | 8.34  | 0.34 | 0.24 | 6.5E-07 | 7.6E-06 |
| 3947036 | RP5-821D | 7.87  | 7.60  | 0.43 | 0.43 | 1.5E-04 | 4.3E-04 |
| 3338552 | CTTN     | 7.08  | 6.81  | 0.34 | 0.27 | 4.5E-07 | 5.7E-06 |
| 3753372 | RFFL     | 8.64  | 8.37  | 0.38 | 0.37 | 2.3E-05 | 1.0E-04 |
| 2550339 | LOC64476 | 8.15  | 7.88  | 0.37 | 0.36 | 1.1E-05 | 6.1E-05 |
| 3939365 | SMARCB1  | 9.40  | 9.14  | 0.28 | 0.28 | 4.5E-07 | 5.7E-06 |
| 3193339 | RXRA     | 7.85  | 7.59  | 0.26 | 0.33 | 6.0E-07 | 7.1E-06 |
| 3954887 | C22orf16 | 8.23  | 7.96  | 0.39 | 0.29 | 2.7E-05 | 1.2E-04 |
| 3677752 | TRAP1    | 9.84  | 9.57  | 0.22 | 0.26 | 1.4E-08 | 4.3E-07 |
| 2947073 | HIST1H1B | 10.72 | 10.45 | 0.45 | 0.45 | 4.1E-04 | 8.9E-04 |
| 3543539 | PAPLN    | 6.65  | 6.39  | 0.29 | 0.24 | 9.3E-08 | 1.8E-06 |
| 2902407 | LTA      | 10.17 | 9.91  | 0.64 | 0.53 | 4.2E-03 | 5.0E-03 |
| 2908179 | VEGF     | 8.44  | 8.18  | 0.65 | 0.59 | 9.3E-03 | 9.2E-03 |
| 3704495 | APRT     | 8.49  | 8.23  | 0.25 | 0.28 | 7.3E-07 | 8.2E-06 |
| 3840058 | PPP2R1A  | 10.33 | 10.07 | 0.21 | 0.30 | 3.1E-07 | 4.3E-06 |
| 3008220 | CYLN2    | 8.35  | 8.09  | 0.23 | 0.24 | 6.3E-09 | 2.4E-07 |
| 3845175 | GAMT     | 7.14  | 6.88  | 0.45 | 0.33 | 1.7E-04 | 4.5E-04 |
| 3842301 | ZNF581   | 8.31  | 8.06  | 0.29 | 0.32 | 6.1E-06 | 3.9E-05 |
| 3835966 | RELB     | 8.45  | 8.19  | 0.32 | 0.35 | 3.1E-05 | 1.3E-04 |
| 4011096 | EDA2R    | 6.92  | 6.67  | 0.56 | 0.55 | 5.5E-03 | 6.2E-03 |
| 2881672 | GTF2IP1  | 10.06 | 9.80  | 0.26 | 0.31 | 1.2E-06 | 1.2E-05 |
| 3673684 | CDT1     | 8.55  | 8.30  | 0.25 | 0.28 | 4.6E-07 | 5.7E-06 |
| 2766192 | TLR10    | 8.92  | 8.66  | 0.52 | 0.50 | 3.3E-03 | 4.2E-03 |
| 2658785 | FAM43A   | 7.13  | 6.88  | 0.35 | 0.31 | 2.1E-05 | 9.5E-05 |
| 3184408 | AKAP2    | 7.48  | 7.23  | 0.41 | 0.37 | 1.3E-04 | 3.8E-04 |
| 3824178 | ANKRD41  | 7.29  | 7.04  | 0.30 | 0.29 | 2.3E-06 | 1.9E-05 |
| 3824993 | GDF15    | 6.92  | 6.67  | 0.53 | 0.48 | 9.0E-04 | 1.6E-03 |

## AJHG, Volume 82

|         |          |       |       |      |      |         |         |
|---------|----------|-------|-------|------|------|---------|---------|
| 3830002 | GRAMD1A  | 8.80  | 8.55  | 0.27 | 0.28 | 2.1E-06 | 1.8E-05 |
| 3009399 | HSPB1    | 8.60  | 8.35  | 0.44 | 0.42 | 3.8E-04 | 8.5E-04 |
| 2334191 | PLK3     | 8.07  | 7.82  | 0.26 | 0.24 | 2.4E-08 | 6.8E-07 |
| 2326993 | SYTL1    | 6.92  | 6.67  | 0.24 | 0.29 | 2.1E-07 | 3.2E-06 |
| 3494137 | LMO7     | 6.99  | 6.74  | 0.59 | 0.61 | 7.2E-03 | 7.5E-03 |
| 2901970 | DDR1     | 7.13  | 6.88  | 0.31 | 0.24 | 9.6E-07 | 1.0E-05 |
| 3960110 | MFNG     | 8.97  | 8.72  | 0.32 | 0.47 | 4.9E-04 | 1.0E-03 |
| 2450855 | PHLDA3   | 6.85  | 6.60  | 0.44 | 0.41 | 4.1E-04 | 9.0E-04 |
| 3431892 | LNK      | 8.27  | 8.02  | 0.23 | 0.21 | 3.0E-08 | 7.6E-07 |
| 3823982 | MYO9B    | 9.02  | 8.78  | 0.21 | 0.27 | 1.8E-07 | 2.8E-06 |
| 3403015 | ENO2     | 9.78  | 9.53  | 0.50 | 0.54 | 3.8E-03 | 4.7E-03 |
| 3333711 | SLC3A2   | 9.57  | 9.33  | 0.38 | 0.42 | 5.6E-04 | 1.1E-03 |
| 3902764 | C20orf11 | 7.02  | 6.78  | 0.35 | 0.28 | 1.4E-05 | 7.0E-05 |
| 3226340 | PTGES2   | 7.78  | 7.54  | 0.25 | 0.31 | 2.8E-06 | 2.2E-05 |
| 3907011 | ADA      | 9.26  | 9.02  | 0.42 | 0.33 | 3.1E-04 | 7.3E-04 |
| 3851545 | MAN2B1   | 9.65  | 9.41  | 0.27 | 0.31 | 3.0E-05 | 1.3E-04 |
| 3115504 | MYC      | 10.59 | 10.35 | 0.40 | 0.45 | 1.0E-03 | 1.8E-03 |
| 3179669 | C9orf89  | 6.78  | 6.54  | 0.33 | 0.32 | 4.5E-05 | 1.7E-04 |
| 2843091 | RGS14    | 8.70  | 8.46  | 0.29 | 0.22 | 1.1E-06 | 1.1E-05 |
| 3868681 | KLK1     | 10.39 | 10.15 | 0.68 | 0.57 | 1.0E-02 | 9.8E-03 |
| 3680213 | SOCS1    | 7.78  | 7.54  | 0.37 | 0.30 | 5.7E-05 | 2.0E-04 |
| 3190762 | ENDOG    | 6.83  | 6.59  | 0.23 | 0.25 | 1.1E-07 | 2.0E-06 |
| 3855538 | MEF2B    | 8.30  | 8.06  | 0.37 | 0.31 | 3.7E-05 | 1.4E-04 |
| 2330253 | ADPRHL2  | 7.83  | 7.59  | 0.30 | 0.41 | 3.6E-04 | 8.1E-04 |
| 3706113 | HIC1     | 7.42  | 7.18  | 0.38 | 0.35 | 1.7E-04 | 4.7E-04 |
| 3734760 | MRPS7    | 9.63  | 9.39  | 0.18 | 0.24 | 2.7E-09 | 1.3E-07 |
| 2515707 | PDK1     | 9.28  | 9.04  | 0.44 | 0.50 | 3.1E-03 | 4.0E-03 |
| 2849469 | ANKH     | 7.70  | 7.46  | 0.50 | 0.38 | 1.2E-03 | 1.9E-03 |
| 2550522 | ZFP36L2  | 9.05  | 8.81  | 0.31 | 0.28 | 6.9E-06 | 4.2E-05 |
| 3845647 | MKNK2    | 11.01 | 10.77 | 0.35 | 0.36 | 3.2E-04 | 7.4E-04 |
| 3358492 | POLR2L   | 8.74  | 8.51  | 0.42 | 0.41 | 1.2E-03 | 1.9E-03 |
| 3721010 | IGFBP4   | 7.74  | 7.50  | 0.42 | 0.36 | 2.6E-04 | 6.4E-04 |
| 3140213 | MSC      | 9.76  | 9.52  | 0.33 | 0.39 | 4.6E-04 | 9.7E-04 |

## AJHG, Volume 82

|         |          |       |       |      |      |         |         |
|---------|----------|-------|-------|------|------|---------|---------|
| 3839006 | PTOV1    | 7.56  | 7.32  | 0.31 | 0.24 | 2.9E-06 | 2.2E-05 |
| 3643966 | C16orf34 | 7.20  | 6.97  | 0.15 | 0.16 | 4.3E-13 | 2.6E-10 |
| 3839346 | SPIB     | 8.38  | 8.15  | 0.46 | 0.46 | 4.2E-03 | 5.1E-03 |
| 3852823 | NDUFB7   | 8.72  | 8.49  | 0.31 | 0.33 | 1.2E-05 | 6.3E-05 |
| 2717593 | SH3TC1   | 7.52  | 7.28  | 0.30 | 0.33 | 3.3E-05 | 1.3E-04 |
| 3818468 | TNFSF9   | 8.64  | 8.41  | 0.34 | 0.35 | 1.0E-05 | 5.6E-05 |
| 3850278 | TYK2     | 9.46  | 9.23  | 0.24 | 0.27 | 3.7E-06 | 2.7E-05 |
| 3815538 | GPX4     | 11.32 | 11.09 | 0.33 | 0.30 | 7.7E-05 | 2.6E-04 |
| 3847989 | TNFSF7   | 10.40 | 10.17 | 0.26 | 0.34 | 2.9E-05 | 1.2E-04 |
| 3475324 | RHOF     | 8.98  | 8.75  | 0.37 | 0.35 | 8.5E-04 | 1.5E-03 |
| 2905404 | PIM1     | 8.42  | 8.19  | 0.38 | 0.41 | 1.1E-03 | 1.9E-03 |
| 3781980 | C18orf17 | 8.61  | 8.38  | 0.60 | 0.48 | 9.3E-03 | 9.2E-03 |
| 3945914 | ATF4     | 9.12  | 8.88  | 0.38 | 0.34 | 1.4E-03 | 2.2E-03 |
| 3417435 | MYL6B    | 7.32  | 7.09  | 0.27 | 0.31 | 1.3E-05 | 6.8E-05 |
| 3770457 | FDXR     | 7.89  | 7.66  | 0.36 | 0.27 | 5.7E-05 | 2.0E-04 |
| 2926802 | MYB      | 8.10  | 7.87  | 0.54 | 0.52 | 6.9E-03 | 7.3E-03 |
| 3320169 | AMPD3    | 8.11  | 7.88  | 0.40 | 0.42 | 4.4E-04 | 9.5E-04 |
| 2452859 | LGTN     | 8.92  | 8.69  | 0.43 | 0.40 | 1.3E-03 | 2.0E-03 |
| 3394488 | PVRL1    | 7.10  | 6.87  | 0.42 | 0.34 | 1.5E-04 | 4.1E-04 |
| 3450655 | CPNE8    | 7.52  | 7.29  | 0.50 | 0.53 | 7.1E-03 | 7.5E-03 |
| 2550325 | OXER1    | 7.76  | 7.54  | 0.24 | 0.23 | 8.0E-08 | 1.6E-06 |
| 3815097 | FSTL3    | 7.53  | 7.31  | 0.41 | 0.36 | 8.2E-04 | 1.5E-03 |
| 3751164 | MGC23280 | 7.62  | 7.40  | 0.38 | 0.30 | 1.7E-04 | 4.7E-04 |
| 3569754 | ZFP36L1  | 10.73 | 10.50 | 0.35 | 0.35 | 1.8E-04 | 4.8E-04 |
| 2946232 | HIST1H1C | 11.79 | 11.56 | 0.26 | 0.29 | 1.3E-05 | 6.8E-05 |
| 3188697 | NEK6     | 10.68 | 10.45 | 0.22 | 0.30 | 9.2E-07 | 9.8E-06 |
| 3820727 | QTRT1    | 7.91  | 7.69  | 0.18 | 0.19 | 1.1E-10 | 9.3E-09 |
| 2887309 | DUSP1    | 7.65  | 7.42  | 0.47 | 0.47 | 4.4E-03 | 5.2E-03 |
| 3774635 | FASN     | 9.41  | 9.19  | 0.19 | 0.22 | 1.7E-09 | 8.6E-08 |
| 3962145 | TNFRSF13 | 9.45  | 9.22  | 0.52 | 0.48 | 2.4E-03 | 3.3E-03 |
| 3057755 | POMZP3   | 7.41  | 7.19  | 0.24 | 0.26 | 3.7E-06 | 2.7E-05 |
| 2363852 | FCRLM1   | 10.61 | 10.39 | 0.44 | 0.51 | 6.1E-03 | 6.6E-03 |
| 3329649 | DDB2     | 9.32  | 9.10  | 0.28 | 0.23 | 9.5E-07 | 9.9E-06 |

## AJHG, Volume 82

|         |          |       |       |      |      |         |         |
|---------|----------|-------|-------|------|------|---------|---------|
| 2676009 | PTK9L    | 9.41  | 9.19  | 0.22 | 0.26 | 3.3E-06 | 2.4E-05 |
| 3846238 | C19orf28 | 8.40  | 8.18  | 0.23 | 0.29 | 1.4E-05 | 7.2E-05 |
| 3823625 | AP1M1    | 8.85  | 8.63  | 0.26 | 0.26 | 1.8E-05 | 8.6E-05 |
| 3950629 | RP3-402G | 8.96  | 8.73  | 0.26 | 0.25 | 2.6E-06 | 2.0E-05 |
| 3923632 | LOC44034 | 9.85  | 9.62  | 0.24 | 0.27 | 1.0E-06 | 1.1E-05 |
| 2524577 | SNORD51  | 7.15  | 6.93  | 0.33 | 0.38 | 1.1E-03 | 1.9E-03 |
| 3075778 | HIPK2    | 9.33  | 9.11  | 0.36 | 0.34 | 2.7E-04 | 6.5E-04 |
| 2504328 | GYPC     | 8.43  | 8.21  | 0.49 | 0.40 | 6.3E-03 | 6.8E-03 |
| 3065601 | FLJ36166 | 7.92  | 7.70  | 0.29 | 0.37 | 2.4E-04 | 6.1E-04 |
| 3855071 | FKBP8    | 8.80  | 8.58  | 0.29 | 0.31 | 4.3E-05 | 1.6E-04 |
| 3205659 | MCART1   | 6.98  | 6.76  | 0.33 | 0.29 | 2.3E-05 | 1.0E-04 |
| 3855818 | PBX4     | 6.87  | 6.65  | 0.44 | 0.48 | 3.6E-03 | 4.5E-03 |
| 3687452 | YPEL3    | 7.68  | 7.46  | 0.29 | 0.30 | 3.2E-05 | 1.3E-04 |
| 3848243 | LOC64569 | 7.71  | 7.49  | 0.46 | 0.52 | 4.2E-03 | 5.1E-03 |
| 3405032 | ETV6     | 9.63  | 9.42  | 0.29 | 0.24 | 1.5E-05 | 7.5E-05 |
| 2333678 | LOC64473 | 8.61  | 8.39  | 0.24 | 0.24 | 2.4E-06 | 2.0E-05 |
| 2758043 | TETRA    | 9.23  | 9.01  | 0.33 | 0.27 | 8.0E-05 | 2.6E-04 |
| 3557666 | JPH4     | 7.07  | 6.86  | 0.29 | 0.17 | 5.7E-07 | 6.9E-06 |
| 3824197 | MRPL34   | 8.85  | 8.64  | 0.27 | 0.30 | 1.3E-05 | 6.6E-05 |
| 3820501 | PDE4A    | 7.54  | 7.32  | 0.39 | 0.27 | 3.0E-04 | 7.1E-04 |
| 3963676 | C22orf9  | 8.50  | 8.29  | 0.33 | 0.28 | 5.8E-05 | 2.0E-04 |
| 2528159 | WNT10A   | 8.43  | 8.21  | 0.31 | 0.31 | 7.5E-05 | 2.5E-04 |
| 2319423 | PIK3CD   | 8.93  | 8.71  | 0.28 | 0.33 | 7.7E-05 | 2.5E-04 |
| 3665846 | THAP11   | 7.68  | 7.46  | 0.32 | 0.28 | 8.1E-05 | 2.6E-04 |
| 3742400 | PFN1     | 8.80  | 8.58  | 0.34 | 0.34 | 2.2E-04 | 5.8E-04 |
| 3377463 | FAU      | 9.12  | 8.91  | 0.34 | 0.31 | 6.0E-05 | 2.1E-04 |
| 3961496 | MKL1     | 8.11  | 7.89  | 0.36 | 0.28 | 2.8E-05 | 1.2E-04 |
| 2902427 | LST1     | 7.32  | 7.11  | 0.36 | 0.32 | 1.9E-04 | 5.1E-04 |
| 3748188 | FLII     | 8.64  | 8.42  | 0.18 | 0.17 | 8.4E-11 | 7.7E-09 |
| 3869030 | SIGLEC10 | 6.60  | 6.38  | 0.32 | 0.28 | 9.1E-06 | 5.2E-05 |
| 2949380 | VARS     | 8.42  | 8.21  | 0.31 | 0.28 | 6.0E-05 | 2.1E-04 |
| 2527672 | MGC50811 | 7.02  | 6.81  | 0.49 | 0.38 | 1.2E-03 | 2.0E-03 |
| 2396461 | MASP2    | 10.63 | 10.42 | 0.24 | 0.22 | 1.8E-07 | 2.8E-06 |

## AJHG, Volume 82

|         |          |       |       |      |      |         |         |
|---------|----------|-------|-------|------|------|---------|---------|
| 3675116 | TMEM8    | 8.62  | 8.40  | 0.30 | 0.21 | 3.4E-05 | 1.4E-04 |
| 3855324 | COPE     | 9.13  | 8.91  | 0.38 | 0.37 | 1.2E-03 | 2.0E-03 |
| 3158478 | C8ORFK29 | 7.35  | 7.13  | 0.21 | 0.18 | 2.3E-08 | 6.6E-07 |
| 3759540 | DCAKD    | 8.45  | 8.23  | 0.31 | 0.26 | 1.8E-05 | 8.4E-05 |
| 3316375 | TSPAN4   | 6.83  | 6.62  | 0.35 | 0.35 | 2.9E-04 | 7.0E-04 |
| 2948630 | IER3     | 8.22  | 8.00  | 0.48 | 0.43 | 7.6E-03 | 7.9E-03 |
| 2489071 | LOC44202 | 7.76  | 7.55  | 0.23 | 0.27 | 5.3E-06 | 3.4E-05 |
| 3431620 | FLJ21127 | 6.94  | 6.73  | 0.39 | 0.36 | 7.5E-04 | 1.4E-03 |
| 3644541 | TRAF7    | 8.25  | 8.04  | 0.30 | 0.31 | 1.1E-04 | 3.4E-04 |
| 2954355 | CUL7     | 7.46  | 7.25  | 0.20 | 0.21 | 7.1E-08 | 1.5E-06 |
| 4007617 | PIM2     | 10.29 | 10.08 | 0.45 | 0.39 | 1.6E-03 | 2.4E-03 |
| 3057520 | TMPIT    | 7.63  | 7.42  | 0.47 | 0.39 | 4.2E-03 | 5.1E-03 |
| 3855856 | EDG4     | 6.93  | 6.72  | 0.21 | 0.30 | 3.0E-06 | 2.3E-05 |
| 3230530 | FBXW5    | 8.65  | 8.44  | 0.27 | 0.38 | 8.7E-04 | 1.6E-03 |
| 2588127 | ATP5G3   | 10.20 | 9.99  | 0.32 | 0.29 | 1.2E-04 | 3.6E-04 |
| 3956909 | THOC5    | 8.34  | 8.13  | 0.35 | 0.37 | 6.3E-04 | 1.2E-03 |
| 3678083 | CORO7    | 8.70  | 8.49  | 0.26 | 0.27 | 6.8E-06 | 4.2E-05 |
| 3960388 | PLA2G6   | 7.19  | 6.98  | 0.21 | 0.21 | 1.1E-07 | 1.9E-06 |
| 2782230 | TIFA     | 8.61  | 8.40  | 0.46 | 0.44 | 7.4E-03 | 7.7E-03 |
| 3653123 | PRKCB1   | 10.45 | 10.25 | 0.44 | 0.35 | 2.1E-03 | 3.0E-03 |
| 3676113 | NME3     | 7.37  | 7.16  | 0.24 | 0.22 | 4.5E-07 | 5.7E-06 |
| 2429914 | LOC65392 | 6.54  | 6.33  | 0.58 | 0.26 | 4.8E-03 | 5.6E-03 |
| 3356115 | APLP2    | 7.28  | 7.08  | 0.50 | 0.50 | 9.4E-03 | 9.2E-03 |
| 3759493 | C1QL1    | 7.73  | 7.52  | 0.32 | 0.28 | 4.8E-05 | 1.8E-04 |
| 2527131 | SMARCAL1 | 8.23  | 8.03  | 0.29 | 0.29 | 2.9E-05 | 1.2E-04 |
| 3873160 | TRIB3    | 8.03  | 7.82  | 0.24 | 0.28 | 2.2E-05 | 1.0E-04 |
| 3852507 | SAMD1    | 8.45  | 8.25  | 0.25 | 0.25 | 1.5E-05 | 7.3E-05 |
| 3954910 | DERL3    | 6.85  | 6.65  | 0.35 | 0.29 | 3.7E-04 | 8.3E-04 |
| 2326126 | SEPN1    | 9.91  | 9.70  | 0.33 | 0.32 | 1.8E-04 | 4.9E-04 |
| 3960478 | CSNK1E   | 8.69  | 8.48  | 0.31 | 0.30 | 2.9E-05 | 1.2E-04 |
| 3868659 | MGC13170 | 8.64  | 8.43  | 0.32 | 0.36 | 8.0E-04 | 1.5E-03 |
| 3434888 | TMEM142A | 8.43  | 8.22  | 0.25 | 0.25 | 9.9E-06 | 5.6E-05 |
| 3854349 | ABHD8    | 7.29  | 7.08  | 0.22 | 0.19 | 1.7E-07 | 2.6E-06 |

## AJHG, Volume 82

|         |          |      |      |      |      |         |         |
|---------|----------|------|------|------|------|---------|---------|
| 4007765 | PRAF2    | 7.08 | 6.87 | 0.28 | 0.28 | 1.7E-05 | 8.1E-05 |
| 3026969 | HSPC268  | 7.15 | 6.95 | 0.21 | 0.25 | 1.9E-07 | 2.9E-06 |
| 3704376 | FAM38A   | 8.59 | 8.39 | 0.22 | 0.17 | 7.8E-08 | 1.6E-06 |
| 3818842 | ZNF358   | 6.72 | 6.52 | 0.37 | 0.32 | 3.0E-04 | 7.1E-04 |
| 3328349 | PHACS    | 6.58 | 6.38 | 0.40 | 0.23 | 1.0E-03 | 1.7E-03 |
| 3846363 | APBA3    | 7.24 | 7.04 | 0.22 | 0.28 | 4.4E-06 | 3.1E-05 |
| 3820414 | MRPL4    | 8.46 | 8.26 | 0.23 | 0.24 | 1.0E-05 | 5.8E-05 |
| 3822657 | CD97     | 9.06 | 8.86 | 0.29 | 0.29 | 1.4E-04 | 4.0E-04 |
| 3716993 | RNF135   | 7.43 | 7.23 | 0.26 | 0.28 | 5.1E-06 | 3.4E-05 |
| 2370355 | MR1      | 9.20 | 9.00 | 0.22 | 0.29 | 6.9E-06 | 4.2E-05 |
| 3014229 | BRI3     | 7.98 | 7.78 | 0.33 | 0.31 | 2.2E-04 | 5.6E-04 |
| 3893458 | C20orf14 | 9.06 | 8.86 | 0.25 | 0.27 | 4.4E-05 | 1.7E-04 |
| 3226253 | FAM102A  | 8.05 | 7.85 | 0.45 | 0.42 | 3.7E-03 | 4.6E-03 |
| 3655172 | SPIN1    | 8.41 | 8.21 | 0.23 | 0.25 | 7.0E-06 | 4.2E-05 |
| 3853193 | BRD4     | 8.35 | 8.15 | 0.23 | 0.26 | 2.8E-06 | 2.2E-05 |
| 3753860 | CCL5     | 8.27 | 8.07 | 0.30 | 0.24 | 8.3E-05 | 2.7E-04 |
| 3868905 | ATPBD3   | 7.11 | 6.92 | 0.27 | 0.24 | 9.2E-06 | 5.2E-05 |
| 3358049 | RNH1     | 7.79 | 7.60 | 0.29 | 0.32 | 3.9E-04 | 8.6E-04 |
| 2995420 | GARS     | 9.00 | 8.80 | 0.32 | 0.32 | 8.3E-04 | 1.5E-03 |
| 3864646 | KCNN4    | 8.27 | 8.07 | 0.40 | 0.34 | 1.5E-03 | 2.4E-03 |
| 3675430 | RPUSD1   | 7.87 | 7.67 | 0.21 | 0.24 | 4.3E-06 | 3.0E-05 |
| 3643229 | KIAA1924 | 8.72 | 8.52 | 0.21 | 0.29 | 3.1E-05 | 1.3E-04 |
| 3608398 | FURIN    | 7.97 | 7.77 | 0.39 | 0.38 | 4.8E-03 | 5.6E-03 |
| 3603687 | TMED3    | 8.12 | 7.92 | 0.24 | 0.21 | 1.4E-06 | 1.3E-05 |
| 2395965 | CTNNBIP1 | 8.52 | 8.32 | 0.27 | 0.29 | 2.1E-05 | 9.8E-05 |
| 2401493 | ID3      | 7.22 | 7.03 | 0.40 | 0.45 | 4.5E-03 | 5.3E-03 |
| 3195139 | UAP1L1   | 8.07 | 7.87 | 0.36 | 0.37 | 3.9E-04 | 8.6E-04 |
| 3723378 | FMNL1    | 8.84 | 8.64 | 0.28 | 0.28 | 1.0E-05 | 5.6E-05 |
| 3341137 | B3GNT6   | 6.71 | 6.51 | 0.35 | 0.35 | 6.1E-04 | 1.2E-03 |
| 2315951 | LOC65416 | 8.53 | 8.33 | 0.27 | 0.28 | 2.5E-05 | 1.1E-04 |
| 2474341 | C2orf28  | 8.60 | 8.41 | 0.26 | 0.30 | 7.6E-05 | 2.5E-04 |
| 3604287 | IL16     | 7.06 | 6.87 | 0.23 | 0.22 | 2.0E-06 | 1.7E-05 |
| 3333358 | INCENP   | 8.20 | 8.00 | 0.20 | 0.20 | 1.6E-09 | 8.3E-08 |



## AJHG, Volume 82

|         |          |       |       |      |      |         |         |
|---------|----------|-------|-------|------|------|---------|---------|
| 3631794 | MYO9A    | 7.14  | 6.95  | 0.37 | 0.34 | 1.1E-03 | 1.9E-03 |
| 3890597 | RNPC1    | 9.05  | 8.86  | 0.36 | 0.36 | 1.5E-03 | 2.3E-03 |
| 3338968 | NADSYN1  | 8.80  | 8.60  | 0.29 | 0.26 | 1.3E-04 | 3.9E-04 |
| 3644593 | GBL      | 8.41  | 8.22  | 0.21 | 0.21 | 3.1E-06 | 2.3E-05 |
| 2428405 | RHOC     | 10.17 | 9.98  | 0.37 | 0.40 | 1.0E-02 | 1.0E-02 |
| 3554728 | LOC64731 | 8.84  | 8.65  | 0.20 | 0.22 | 2.2E-06 | 1.9E-05 |
| 3724989 | CDK5RAP3 | 8.63  | 8.44  | 0.29 | 0.33 | 1.5E-04 | 4.3E-04 |
| 3314614 | NKX6-2   | 7.46  | 7.27  | 0.26 | 0.25 | 3.0E-06 | 2.3E-05 |
| 3378320 | ZDHHC24  | 8.00  | 7.81  | 0.24 | 0.26 | 3.0E-05 | 1.2E-04 |
| 2502952 | MGC10993 | 7.33  | 7.14  | 0.30 | 0.34 | 3.3E-04 | 7.7E-04 |
| 3884191 | SRC      | 8.47  | 8.28  | 0.26 | 0.30 | 1.7E-04 | 4.6E-04 |
| 3695699 | ATP6V0D1 | 9.42  | 9.23  | 0.32 | 0.37 | 1.9E-03 | 2.8E-03 |
| 2491686 | LOC51255 | 8.73  | 8.54  | 0.23 | 0.27 | 8.2E-05 | 2.7E-04 |
| 3832616 | EIF3S12  | 10.64 | 10.45 | 0.27 | 0.26 | 6.3E-05 | 2.2E-04 |
| 2392584 | TNFRSF14 | 9.20  | 9.01  | 0.39 | 0.36 | 2.0E-03 | 2.9E-03 |
| 2904000 | HMGA1    | 8.28  | 8.09  | 0.21 | 0.25 | 3.8E-06 | 2.7E-05 |
| 3263743 | DUSP5    | 10.02 | 9.84  | 0.41 | 0.41 | 9.1E-03 | 9.0E-03 |
| 3733911 | SSTR2    | 7.08  | 6.89  | 0.44 | 0.30 | 4.2E-03 | 5.1E-03 |
| 3572869 | C14orf4  | 7.98  | 7.79  | 0.22 | 0.19 | 4.3E-07 | 5.5E-06 |
| 3848408 | PEX11G   | 6.66  | 6.47  | 0.33 | 0.29 | 1.6E-04 | 4.4E-04 |
| 3824497 | BPY2IP1  | 8.35  | 8.17  | 0.23 | 0.19 | 1.5E-06 | 1.4E-05 |
| 3773980 | C17orf70 | 7.73  | 7.54  | 0.19 | 0.23 | 4.4E-07 | 5.6E-06 |
| 3846982 | TICAM1   | 7.65  | 7.47  | 0.23 | 0.20 | 5.9E-07 | 7.0E-06 |
| 3611684 | LOC65086 | 8.20  | 8.01  | 0.42 | 0.32 | 2.2E-03 | 3.1E-03 |
| 3439013 | NOC4L    | 7.53  | 7.34  | 0.19 | 0.20 | 3.7E-08 | 8.9E-07 |
| 3158767 | RECQL4   | 7.53  | 7.35  | 0.18 | 0.20 | 5.0E-07 | 6.2E-06 |
| 3850234 | RAVER1   | 8.47  | 8.29  | 0.20 | 0.20 | 1.2E-06 | 1.2E-05 |
| 2835576 | SYNPO    | 7.10  | 6.92  | 0.38 | 0.30 | 2.5E-03 | 3.4E-03 |
| 3854877 | JUND     | 9.09  | 8.91  | 0.29 | 0.28 | 4.7E-04 | 9.9E-04 |
| 3830530 | TMEM147  | 8.47  | 8.28  | 0.26 | 0.24 | 5.5E-05 | 2.0E-04 |
| 2401994 | RUNX3    | 10.03 | 9.85  | 0.25 | 0.26 | 1.5E-04 | 4.3E-04 |
| 2714729 | LOC65131 | 6.82  | 6.63  | 0.22 | 0.22 | 2.8E-06 | 2.2E-05 |
| 3674146 | LOC38834 | 8.63  | 8.44  | 0.34 | 0.28 | 9.8E-04 | 1.7E-03 |

## AJHG, Volume 82

|         |          |       |       |      |      |         |         |
|---------|----------|-------|-------|------|------|---------|---------|
| 3580498 | CDC42BPB | 7.11  | 6.92  | 0.36 | 0.32 | 2.0E-03 | 2.9E-03 |
| 3743486 | GABARAP  | 9.80  | 9.62  | 0.34 | 0.36 | 2.1E-03 | 3.0E-03 |
| 3820469 | ICAM5    | 6.49  | 6.31  | 0.21 | 0.20 | 1.3E-06 | 1.2E-05 |
| 3839057 | TBC1D17  | 8.35  | 8.17  | 0.19 | 0.22 | 3.3E-07 | 4.6E-06 |
| 3023565 | NRF1     | 6.98  | 6.79  | 0.25 | 0.28 | 5.1E-05 | 1.9E-04 |
| 3011830 | ENSESTT0 | 10.55 | 10.37 | 0.36 | 0.40 | 4.1E-03 | 4.9E-03 |
| 3190061 | FPGS     | 8.66  | 8.48  | 0.24 | 0.32 | 7.2E-04 | 1.4E-03 |
| 3844855 | C19orf22 | 9.04  | 8.86  | 0.21 | 0.28 | 5.6E-05 | 2.0E-04 |
| 3334749 | PPP2R5B  | 7.43  | 7.24  | 0.26 | 0.22 | 1.3E-05 | 6.7E-05 |
| 3738205 | MRPL12   | 8.81  | 8.62  | 0.27 | 0.32 | 5.3E-04 | 1.1E-03 |
| 2341083 | GADD45A  | 8.50  | 8.32  | 0.36 | 0.28 | 4.8E-04 | 1.0E-03 |
| 3818395 | ALKBH7   | 7.46  | 7.28  | 0.31 | 0.34 | 8.1E-04 | 1.5E-03 |
| 3739812 | GEMIN4   | 8.09  | 7.91  | 0.26 | 0.27 | 8.2E-05 | 2.7E-04 |
| 3776279 | EMILIN2  | 9.01  | 8.83  | 0.30 | 0.34 | 3.5E-04 | 7.9E-04 |
| 3816225 | C19orf36 | 7.33  | 7.15  | 0.23 | 0.22 | 7.5E-07 | 8.3E-06 |
| 3741171 | KIAA0664 | 8.77  | 8.59  | 0.23 | 0.22 | 7.0E-06 | 4.2E-05 |
| 3336351 | LOC65278 | 7.70  | 7.51  | 0.25 | 0.22 | 1.0E-05 | 5.6E-05 |
| 2970985 | TSPYL4   | 7.28  | 7.10  | 0.22 | 0.31 | 1.2E-04 | 3.6E-04 |
| 2946353 | HIST1H1D | 10.04 | 9.85  | 0.42 | 0.41 | 7.8E-03 | 8.0E-03 |
| 2589214 | PRKRA    | 9.17  | 8.99  | 0.30 | 0.25 | 2.0E-04 | 5.4E-04 |
| 2947077 | HIST1H3I | 11.78 | 11.60 | 0.32 | 0.37 | 2.7E-03 | 3.6E-03 |
| 3632940 | UBL7     | 8.84  | 8.66  | 0.41 | 0.37 | 7.3E-03 | 7.7E-03 |
| 3158812 | MGC70857 | 7.07  | 6.89  | 0.17 | 0.15 | 1.6E-08 | 4.7E-07 |
| 3819543 | LOC44125 | 8.59  | 8.41  | 0.42 | 0.35 | 6.8E-04 | 1.3E-03 |
| 3847873 | SLC25A23 | 9.17  | 8.99  | 0.37 | 0.37 | 2.3E-03 | 3.2E-03 |
| 2535830 | RNPEPL1  | 8.39  | 8.21  | 0.24 | 0.24 | 5.6E-05 | 2.0E-04 |
| 3320123 | ADM      | 6.97  | 6.79  | 0.38 | 0.31 | 1.5E-03 | 2.3E-03 |
| 3865586 | FBXO46   | 8.43  | 8.25  | 0.41 | 0.31 | 4.4E-03 | 5.2E-03 |
| 3945006 | H1FO     | 7.47  | 7.29  | 0.34 | 0.27 | 1.0E-03 | 1.8E-03 |
| 2672016 | FYCO1    | 6.61  | 6.43  | 0.21 | 0.18 | 1.7E-07 | 2.7E-06 |
| 3642707 | ITFG3    | 8.69  | 8.51  | 0.21 | 0.24 | 1.4E-05 | 7.0E-05 |
| 2662473 | PRRT3    | 6.83  | 6.65  | 0.41 | 0.32 | 5.6E-03 | 6.3E-03 |
| 3977886 | SSX8     | 7.88  | 7.70  | 0.40 | 0.41 | 5.5E-03 | 6.2E-03 |

AJHG, Volume 82

|         |          |       |       |      |      |         |         |
|---------|----------|-------|-------|------|------|---------|---------|
| 3851020 | SITPEC   | 7.58  | 7.40  | 0.23 | 0.21 | 4.7E-06 | 3.2E-05 |
| 3558071 | RABGGTA  | 8.43  | 8.25  | 0.21 | 0.26 | 5.3E-05 | 1.9E-04 |
| 3819016 | STXBP2   | 8.64  | 8.46  | 0.20 | 0.30 | 2.0E-04 | 5.2E-04 |
| 3990727 | RAB33A   | 7.55  | 7.37  | 0.35 | 0.34 | 1.7E-03 | 2.6E-03 |
| 3770979 | UNC13D   | 7.87  | 7.69  | 0.24 | 0.22 | 7.8E-06 | 4.6E-05 |
| 2992936 | MGC27348 | 7.83  | 7.65  | 0.31 | 0.28 | 2.5E-04 | 6.1E-04 |
| 2757347 | TMEM129  | 7.13  | 6.95  | 0.19 | 0.20 | 7.3E-07 | 8.2E-06 |
| 3685610 | ARHGAP17 | 8.76  | 8.58  | 0.37 | 0.31 | 3.0E-03 | 4.0E-03 |
| 3854627 | LOC65266 | 8.75  | 8.57  | 0.32 | 0.36 | 2.7E-03 | 3.6E-03 |
| 3400034 | WNK1     | 9.76  | 9.58  | 0.32 | 0.30 | 1.0E-03 | 1.8E-03 |
| 3120051 | CYC1     | 9.83  | 9.65  | 0.28 | 0.35 | 1.6E-03 | 2.5E-03 |
| 3894288 | TCF15    | 7.87  | 7.69  | 0.30 | 0.27 | 4.1E-04 | 9.1E-04 |
| 3623717 | FLJ10038 | 7.28  | 7.11  | 0.23 | 0.21 | 1.2E-06 | 1.2E-05 |
| 3944084 | TOM1     | 7.29  | 7.11  | 0.38 | 0.27 | 1.2E-03 | 1.9E-03 |
| 2532626 | UNQ830   | 7.51  | 7.33  | 0.31 | 0.24 | 2.3E-04 | 5.9E-04 |
| 3358174 | IRF7     | 8.79  | 8.62  | 0.31 | 0.27 | 4.7E-04 | 1.0E-03 |
| 3227454 | P518     | 8.17  | 7.99  | 0.24 | 0.31 | 3.7E-04 | 8.4E-04 |
| 3742708 | C1QBP    | 10.82 | 10.64 | 0.24 | 0.27 | 1.1E-04 | 3.3E-04 |
| 2817291 | JMY      | 6.80  | 6.63  | 0.38 | 0.44 | 8.6E-03 | 8.7E-03 |
| 2330075 | EIF2C1   | 7.97  | 7.79  | 0.21 | 0.26 | 4.3E-05 | 1.6E-04 |
| 3334339 | FKBP2    | 8.79  | 8.62  | 0.35 | 0.30 | 2.4E-03 | 3.3E-03 |
| 3956984 | ZMAT5    | 6.67  | 6.50  | 0.30 | 0.32 | 1.1E-03 | 1.9E-03 |
| 3871576 | FLJ14768 | 7.02  | 6.84  | 0.24 | 0.29 | 2.6E-04 | 6.4E-04 |
| 3337360 | NDUFS8   | 7.95  | 7.77  | 0.28 | 0.33 | 1.2E-03 | 2.0E-03 |
| 3824395 | PGLS     | 7.27  | 7.10  | 0.26 | 0.26 | 1.4E-04 | 4.0E-04 |
| 3823901 | SIN3B    | 7.82  | 7.65  | 0.20 | 0.23 | 7.7E-06 | 4.5E-05 |
| 3230932 | C9orf75  | 7.13  | 6.95  | 0.25 | 0.22 | 1.0E-04 | 3.2E-04 |
| 3476457 | NCOR2    | 8.55  | 8.37  | 0.19 | 0.19 | 2.1E-07 | 3.1E-06 |
| 3850040 | EIF3S4   | 9.76  | 9.59  | 0.22 | 0.23 | 8.1E-06 | 4.7E-05 |
| 3977083 | CCDC22   | 7.72  | 7.55  | 0.20 | 0.24 | 5.3E-05 | 1.9E-04 |
| 3833443 | PLD3     | 8.63  | 8.45  | 0.28 | 0.28 | 3.3E-04 | 7.7E-04 |
| 3896200 | PCNA     | 10.46 | 10.28 | 0.28 | 0.30 | 5.2E-04 | 1.1E-03 |
| 3881282 | HM13     | 8.74  | 8.56  | 0.29 | 0.27 | 1.8E-04 | 4.9E-04 |

## AJHG, Volume 82

|         |          |       |       |      |      |         |         |
|---------|----------|-------|-------|------|------|---------|---------|
| 3531163 | COCH     | 7.44  | 7.27  | 0.40 | 0.31 | 4.3E-03 | 5.1E-03 |
| 3819104 | TRAPPC5  | 9.94  | 9.76  | 0.34 | 0.31 | 2.1E-03 | 3.0E-03 |
| 3607232 | ISG20L1  | 7.50  | 7.33  | 0.25 | 0.26 | 3.4E-05 | 1.4E-04 |
| 3334277 | NUDT22   | 7.90  | 7.72  | 0.31 | 0.30 | 1.8E-03 | 2.7E-03 |
| 2321466 | KIAA1026 | 6.66  | 6.49  | 0.32 | 0.22 | 6.5E-05 | 2.2E-04 |
| 3696016 | PSMB10   | 8.54  | 8.37  | 0.27 | 0.32 | 9.3E-04 | 1.6E-03 |
| 3655920 | ALDOA    | 8.31  | 8.14  | 0.34 | 0.33 | 2.2E-03 | 3.1E-03 |
| 2669930 | AXUD1    | 8.14  | 7.97  | 0.30 | 0.34 | 1.9E-03 | 2.7E-03 |
| 2857112 | UNG2     | 6.64  | 6.47  | 0.24 | 0.29 | 1.0E-04 | 3.2E-04 |
| 3415937 | C12orf10 | 8.41  | 8.24  | 0.28 | 0.30 | 9.8E-04 | 1.7E-03 |
| 2965653 | GPR63    | 7.31  | 7.14  | 0.35 | 0.39 | 3.6E-03 | 4.5E-03 |
| 2450501 | KIF21B   | 7.50  | 7.32  | 0.27 | 0.25 | 1.1E-04 | 3.3E-04 |
| 2916716 | PNRC1    | 9.54  | 9.37  | 0.36 | 0.42 | 7.5E-03 | 7.8E-03 |
| 3715839 | TRAF4    | 9.46  | 9.28  | 0.25 | 0.26 | 1.3E-04 | 3.7E-04 |
| 2460551 | EGLN1    | 8.36  | 8.19  | 0.39 | 0.33 | 3.6E-03 | 4.5E-03 |
| 3855506 | FLJ20422 | 7.63  | 7.45  | 0.28 | 0.32 | 1.6E-03 | 2.4E-03 |
| 3847959 | TUBB4    | 7.14  | 6.97  | 0.37 | 0.33 | 3.7E-05 | 1.4E-04 |
| 3951732 | CECR5    | 7.78  | 7.61  | 0.34 | 0.35 | 2.2E-03 | 3.1E-03 |
| 3644249 | TBL3     | 8.49  | 8.31  | 0.25 | 0.31 | 7.3E-04 | 1.4E-03 |
| 3334325 | VEGFB    | 8.98  | 8.80  | 0.26 | 0.34 | 5.0E-04 | 1.0E-03 |
| 3674886 | C16orf35 | 8.53  | 8.35  | 0.27 | 0.31 | 5.2E-04 | 1.1E-03 |
| 3771120 | FBF1     | 8.26  | 8.08  | 0.25 | 0.28 | 6.7E-04 | 1.3E-03 |
| 3795403 | KCNG2    | 7.15  | 6.98  | 0.22 | 0.23 | 5.4E-05 | 1.9E-04 |
| 2903488 | HSD17B8  | 7.67  | 7.50  | 0.28 | 0.33 | 3.4E-04 | 7.8E-04 |
| 3265140 | ADRB1    | 7.21  | 7.04  | 0.28 | 0.22 | 5.2E-05 | 1.9E-04 |
| 3815399 | CNN2     | 10.66 | 10.49 | 0.42 | 0.32 | 9.1E-03 | 9.0E-03 |
| 3329247 | DGKZ     | 7.12  | 6.95  | 0.23 | 0.23 | 3.4E-05 | 1.4E-04 |
| 3887107 | LOC65166 | 7.27  | 7.11  | 0.35 | 0.35 | 3.7E-03 | 4.6E-03 |
| 2881370 | CD74     | 12.49 | 12.32 | 0.22 | 0.19 | 1.3E-05 | 6.8E-05 |
| 3454006 | FMNL3    | 8.79  | 8.63  | 0.38 | 0.32 | 9.2E-03 | 9.1E-03 |
| 3375935 | B3GAT3   | 7.92  | 7.75  | 0.26 | 0.33 | 1.1E-03 | 1.9E-03 |
| 3841474 | LENG8    | 8.91  | 8.74  | 0.25 | 0.25 | 6.9E-05 | 2.4E-04 |
| 3643019 | PIGQ     | 7.37  | 7.20  | 0.21 | 0.24 | 3.6E-05 | 1.4E-04 |

## AJHG, Volume 82

|         |          |       |       |      |      |         |         |
|---------|----------|-------|-------|------|------|---------|---------|
| 2552051 | KCNK12   | 7.40  | 7.23  | 0.31 | 0.27 | 1.1E-04 | 3.4E-04 |
| 3824540 | FCHO1    | 7.58  | 7.42  | 0.22 | 0.27 | 6.1E-05 | 2.1E-04 |
| 3715460 | PYY2     | 7.03  | 6.86  | 0.25 | 0.28 | 5.1E-04 | 1.1E-03 |
| 3357279 | VPS26B   | 6.98  | 6.81  | 0.27 | 0.29 | 6.8E-05 | 2.3E-04 |
| 3273667 | ADARB2   | 6.56  | 6.39  | 0.25 | 0.25 | 2.4E-05 | 1.1E-04 |
| 3975815 | CHST7    | 7.09  | 6.92  | 0.25 | 0.28 | 2.4E-04 | 6.0E-04 |
| 3228463 | RALGDS   | 7.75  | 7.59  | 0.26 | 0.32 | 6.1E-04 | 1.2E-03 |
| 3825586 | RFXANK   | 8.26  | 8.10  | 0.22 | 0.20 | 1.0E-05 | 5.7E-05 |
| 3736204 | LOC64259 | 6.97  | 6.81  | 0.35 | 0.27 | 1.4E-03 | 2.2E-03 |
| 3676649 | DCI      | 7.98  | 7.81  | 0.27 | 0.30 | 6.9E-04 | 1.3E-03 |
| 2949885 | NOTCH4   | 6.79  | 6.63  | 0.34 | 0.36 | 2.6E-03 | 3.4E-03 |
| 3696057 | SLC12A4  | 7.83  | 7.66  | 0.22 | 0.24 | 1.6E-05 | 8.0E-05 |
| 2394626 | ACOT7    | 7.43  | 7.27  | 0.15 | 0.16 | 2.8E-08 | 7.4E-07 |
| 3358361 | PDDC1    | 8.05  | 7.89  | 0.22 | 0.23 | 1.1E-04 | 3.4E-04 |
| 3656665 | MGC13024 | 8.28  | 8.11  | 0.37 | 0.29 | 1.7E-03 | 2.6E-03 |
| 3908631 | PREX1    | 9.73  | 9.56  | 0.21 | 0.26 | 1.5E-04 | 4.2E-04 |
| 2713555 | KIAA0226 | 9.03  | 8.87  | 0.26 | 0.20 | 1.2E-05 | 6.6E-05 |
| 3722770 | C17orf53 | 7.22  | 7.06  | 0.20 | 0.18 | 7.8E-07 | 8.6E-06 |
| 3337168 | GSTP1    | 11.67 | 11.51 | 0.33 | 0.35 | 2.1E-03 | 3.0E-03 |
| 3196842 | RFX3     | 6.92  | 6.75  | 0.33 | 0.34 | 2.0E-03 | 2.9E-03 |
| 3056656 | LOC64521 | 6.95  | 6.79  | 0.37 | 0.34 | 8.3E-03 | 8.4E-03 |
| 3644625 | E4F1     | 7.23  | 7.07  | 0.21 | 0.23 | 4.0E-05 | 1.6E-04 |
| 2399718 | AKR7A2   | 8.59  | 8.43  | 0.24 | 0.26 | 1.3E-04 | 3.8E-04 |
| 2745712 | LOC44104 | 6.93  | 6.76  | 0.34 | 0.29 | 1.0E-03 | 1.8E-03 |
| 3644057 | MAPK8IP3 | 7.71  | 7.54  | 0.19 | 0.20 | 4.6E-06 | 3.1E-05 |
| 3544905 | C14orf11 | 8.03  | 7.87  | 0.35 | 0.31 | 6.4E-03 | 6.9E-03 |
| 3316149 | EPS8L2   | 7.01  | 6.85  | 0.18 | 0.16 | 2.9E-08 | 7.6E-07 |
| 3842558 | ZNF444   | 6.51  | 6.34  | 0.32 | 0.23 | 4.9E-04 | 1.0E-03 |
| 2401609 | GALE     | 7.95  | 7.78  | 0.32 | 0.34 | 5.1E-03 | 5.9E-03 |
| 3873338 | C20orf55 | 7.32  | 7.16  | 0.21 | 0.24 | 4.4E-05 | 1.7E-04 |
| 2673648 | NCKIPSD  | 7.56  | 7.40  | 0.25 | 0.30 | 7.1E-04 | 1.3E-03 |
| 3850166 | LOC64610 | 8.04  | 7.88  | 0.32 | 0.35 | 2.0E-03 | 2.9E-03 |
| 3854000 | SLC35E1  | 9.13  | 8.96  | 0.24 | 0.23 | 1.5E-04 | 4.3E-04 |

## AJHG, Volume 82

|         |          |       |       |      |      |         |         |
|---------|----------|-------|-------|------|------|---------|---------|
| 3846538 | EEF2     | 12.14 | 11.97 | 0.23 | 0.29 | 4.1E-04 | 9.0E-04 |
| 3334783 | SNX15    | 8.17  | 8.00  | 0.27 | 0.24 | 3.1E-05 | 1.3E-04 |
| 3865223 | TRAPPC6A | 8.05  | 7.89  | 0.34 | 0.40 | 5.1E-03 | 5.8E-03 |
| 3317145 | MRPL23   | 8.12  | 7.96  | 0.31 | 0.36 | 3.1E-03 | 4.0E-03 |
| 3157138 | LYPD2    | 6.71  | 6.54  | 0.23 | 0.22 | 8.9E-05 | 2.8E-04 |
| 3825446 | DDX49    | 7.79  | 7.63  | 0.26 | 0.28 | 8.2E-04 | 1.5E-03 |
| 3844978 | KIAA0963 | 7.91  | 7.75  | 0.22 | 0.27 | 3.1E-04 | 7.2E-04 |
| 3434142 | PRKAB1   | 8.63  | 8.46  | 0.34 | 0.29 | 3.5E-03 | 4.3E-03 |
| 2641479 | GP9      | 6.82  | 6.66  | 0.32 | 0.33 | 1.8E-03 | 2.7E-03 |
| 3939707 | CABIN1   | 8.20  | 8.04  | 0.16 | 0.22 | 5.6E-06 | 3.6E-05 |
| 3833620 | LTBP4    | 7.31  | 7.15  | 0.17 | 0.17 | 4.0E-08 | 9.1E-07 |
| 3676134 | SPSB3    | 7.44  | 7.28  | 0.21 | 0.21 | 5.3E-06 | 3.5E-05 |
| 3194810 | MAMDC4   | 7.73  | 7.57  | 0.26 | 0.23 | 1.6E-04 | 4.5E-04 |
| 3815809 | NDUFS7   | 7.91  | 7.75  | 0.30 | 0.28 | 1.6E-03 | 2.5E-03 |
| 4012154 | RPS4X    | 6.84  | 6.68  | 0.35 | 0.38 | 8.4E-03 | 8.5E-03 |
| 3850261 | ICAM3    | 10.37 | 10.21 | 0.29 | 0.29 | 1.9E-03 | 2.7E-03 |
| 3337390 | TCIRG1   | 9.53  | 9.37  | 0.29 | 0.31 | 3.9E-03 | 4.8E-03 |
| 2788287 | LOC64659 | 7.53  | 7.37  | 0.31 | 0.30 | 4.2E-04 | 9.2E-04 |
| 3863547 | ERF      | 7.47  | 7.31  | 0.32 | 0.28 | 8.8E-04 | 1.6E-03 |
| 3688424 | C16orf58 | 7.99  | 7.82  | 0.20 | 0.23 | 5.0E-05 | 1.9E-04 |
| 3470831 | MMAB     | 7.94  | 7.77  | 0.23 | 0.27 | 8.0E-05 | 2.6E-04 |
| 3822805 | GPSN2    | 7.90  | 7.74  | 0.30 | 0.39 | 3.3E-03 | 4.2E-03 |
| 4045676 | S100A13  | 7.07  | 6.91  | 0.36 | 0.33 | 9.9E-03 | 9.6E-03 |
| 3698256 | ATBF1    | 6.96  | 6.80  | 0.35 | 0.28 | 4.0E-03 | 4.8E-03 |
| 3965697 | HDAC10   | 7.65  | 7.49  | 0.16 | 0.18 | 1.2E-06 | 1.2E-05 |
| 3848871 | CD320    | 8.30  | 8.14  | 0.21 | 0.19 | 5.3E-06 | 3.4E-05 |
| 3743734 | C17orf61 | 7.70  | 7.54  | 0.36 | 0.36 | 9.2E-03 | 9.1E-03 |
| 3023350 | SMO      | 6.83  | 6.67  | 0.31 | 0.21 | 4.3E-04 | 9.3E-04 |
| 3816778 | GNA11    | 6.63  | 6.47  | 0.26 | 0.27 | 4.5E-04 | 9.6E-04 |
| 2848464 | DAP      | 8.85  | 8.69  | 0.28 | 0.30 | 1.5E-03 | 2.4E-03 |
| 3675205 | MGC13114 | 7.85  | 7.69  | 0.24 | 0.25 | 3.9E-04 | 8.7E-04 |
| 3304355 | CUEDC2   | 8.50  | 8.34  | 0.33 | 0.34 | 6.8E-03 | 7.3E-03 |
| 3815610 | ATP5D    | 9.38  | 9.22  | 0.30 | 0.31 | 2.5E-03 | 3.4E-03 |

## AJHG, Volume 82

|         |          |       |       |      |      |         |         |
|---------|----------|-------|-------|------|------|---------|---------|
| 3803120 | B4GALT6  | 8.14  | 7.98  | 0.35 | 0.29 | 3.2E-03 | 4.1E-03 |
| 3814978 | CDC34    | 7.35  | 7.19  | 0.25 | 0.27 | 5.5E-04 | 1.1E-03 |
| 2326018 | LDLRAP1  | 7.36  | 7.20  | 0.23 | 0.31 | 7.3E-04 | 1.4E-03 |
| 3743906 | TP53     | 9.79  | 9.63  | 0.26 | 0.25 | 4.2E-04 | 9.2E-04 |
| 3861738 | SARS2    | 7.76  | 7.60  | 0.31 | 0.29 | 2.1E-03 | 3.0E-03 |
| 3764471 | MTMR4    | 9.61  | 9.45  | 0.24 | 0.22 | 6.3E-05 | 2.2E-04 |
| 3743701 | C17orf61 | 7.81  | 7.65  | 0.21 | 0.21 | 5.2E-05 | 1.9E-04 |
| 3302360 | MMS19L   | 8.67  | 8.51  | 0.23 | 0.28 | 5.3E-04 | 1.1E-03 |
| 3744150 | PER1     | 7.27  | 7.11  | 0.28 | 0.34 | 2.7E-03 | 3.6E-03 |
| 2902463 | BAT2     | 9.42  | 9.26  | 0.21 | 0.18 | 7.9E-06 | 4.6E-05 |
| 3706255 | RUTBC1   | 7.60  | 7.44  | 0.20 | 0.19 | 2.3E-05 | 1.0E-04 |
| 3572209 | PGF      | 6.99  | 6.83  | 0.34 | 0.26 | 9.6E-04 | 1.7E-03 |
| 3865776 | IRF2BP1  | 7.49  | 7.33  | 0.27 | 0.27 | 1.2E-03 | 2.0E-03 |
| 4027370 | SLC10A3  | 7.90  | 7.74  | 0.22 | 0.23 | 5.9E-04 | 1.2E-03 |
| 3158516 | CPSF1    | 8.80  | 8.64  | 0.20 | 0.18 | 1.3E-05 | 6.7E-05 |
| 2573641 | LOC44090 | 9.01  | 8.85  | 0.29 | 0.37 | 5.1E-03 | 5.8E-03 |
| 2558595 | FLJ14668 | 7.45  | 7.30  | 0.27 | 0.30 | 1.5E-04 | 4.3E-04 |
| 3863323 | RABAC1   | 8.54  | 8.38  | 0.36 | 0.32 | 5.6E-03 | 6.3E-03 |
| 2695648 | ACAD11   | 7.12  | 6.96  | 0.40 | 0.39 | 9.8E-03 | 9.5E-03 |
| 3602767 | PSTPIP1  | 6.77  | 6.61  | 0.28 | 0.30 | 7.9E-04 | 1.5E-03 |
| 3814956 | C19orf20 | 6.53  | 6.37  | 0.30 | 0.29 | 1.1E-03 | 1.9E-03 |
| 2437577 | YY1AP1   | 9.24  | 9.09  | 0.23 | 0.23 | 7.3E-05 | 2.5E-04 |
| 3708306 | ACADVL   | 9.68  | 9.52  | 0.25 | 0.26 | 5.3E-04 | 1.1E-03 |
| 3829687 | GPI      | 11.30 | 11.14 | 0.23 | 0.31 | 1.6E-03 | 2.4E-03 |
| 2820884 | GPR150   | 7.35  | 7.19  | 0.26 | 0.23 | 2.2E-04 | 5.7E-04 |
| 3865679 | DMPK     | 7.55  | 7.39  | 0.21 | 0.19 | 8.0E-06 | 4.6E-05 |
| 3824316 | LOC93343 | 7.88  | 7.72  | 0.27 | 0.25 | 5.2E-04 | 1.1E-03 |
| 3845620 | BTBD2    | 8.87  | 8.72  | 0.26 | 0.30 | 3.8E-03 | 4.7E-03 |
| 2315894 | LOC64396 | 8.74  | 8.58  | 0.27 | 0.28 | 3.2E-04 | 7.5E-04 |
| 3815566 | STK11    | 8.23  | 8.07  | 0.28 | 0.33 | 4.0E-03 | 4.9E-03 |
| 3204744 | TLN1     | 9.92  | 9.76  | 0.24 | 0.29 | 2.9E-03 | 3.8E-03 |
| 3023246 | IRF5     | 9.35  | 9.19  | 0.31 | 0.33 | 3.0E-03 | 3.9E-03 |
| 3403299 | PEX5     | 7.39  | 7.23  | 0.29 | 0.29 | 8.8E-04 | 1.6E-03 |

## AJHG, Volume 82

|         |          |      |      |      |      |         |         |
|---------|----------|------|------|------|------|---------|---------|
| 3302240 | KIAA0690 | 7.58 | 7.42 | 0.26 | 0.22 | 4.6E-05 | 1.7E-04 |
| 3322717 | GTF2H1   | 7.52 | 7.37 | 0.31 | 0.30 | 2.1E-03 | 3.0E-03 |
| 2404521 | PEF1     | 8.89 | 8.74 | 0.28 | 0.30 | 2.7E-03 | 3.6E-03 |
| 3977646 | GSPT2    | 7.48 | 7.32 | 0.29 | 0.26 | 1.1E-03 | 1.9E-03 |
| 3866106 | GNG8     | 6.61 | 6.45 | 0.29 | 0.23 | 2.5E-03 | 3.4E-03 |
| 3832760 | NFKBIB   | 8.60 | 8.45 | 0.20 | 0.19 | 5.4E-06 | 3.5E-05 |
| 3815416 | ABCA7    | 7.50 | 7.34 | 0.16 | 0.18 | 1.1E-06 | 1.1E-05 |
| 3075136 | CREB3L2  | 9.41 | 9.26 | 0.35 | 0.36 | 2.3E-03 | 3.2E-03 |
| 3716151 | ANKRD13B | 6.91 | 6.75 | 0.23 | 0.19 | 2.8E-04 | 6.7E-04 |
| 2391172 | TNFRSF4  | 7.37 | 7.22 | 0.23 | 0.21 | 1.3E-05 | 6.9E-05 |
| 3304215 | LDB1     | 8.79 | 8.64 | 0.24 | 0.22 | 8.5E-05 | 2.7E-04 |
| 2673937 | QARS     | 9.93 | 9.78 | 0.27 | 0.26 | 1.3E-03 | 2.1E-03 |
| 3842315 | LOC65376 | 7.55 | 7.40 | 0.22 | 0.22 | 7.3E-05 | 2.5E-04 |
| 3825225 | FLJ20850 | 7.70 | 7.54 | 0.19 | 0.22 | 3.7E-05 | 1.5E-04 |
| 2829416 | SEC24A   | 8.81 | 8.66 | 0.40 | 0.41 | 8.9E-03 | 8.9E-03 |
| 3157460 | ZC3H3    | 7.84 | 7.69 | 0.18 | 0.22 | 1.7E-05 | 8.4E-05 |
| 3200689 | RPS6     | 7.53 | 7.37 | 0.31 | 0.29 | 2.2E-03 | 3.1E-03 |
| 3851826 | DNASE2   | 8.22 | 8.07 | 0.34 | 0.30 | 3.4E-03 | 4.3E-03 |
| 3580832 | XRCC3    | 7.08 | 6.92 | 0.26 | 0.25 | 1.2E-03 | 1.9E-03 |
| 2619120 | TRAK1    | 7.96 | 7.81 | 0.31 | 0.30 | 2.3E-03 | 3.2E-03 |
| 3815493 | HMHA1    | 8.76 | 8.61 | 0.21 | 0.26 | 5.1E-04 | 1.1E-03 |
| 2576281 | LOC13007 | 9.40 | 9.24 | 0.17 | 0.15 | 9.1E-07 | 9.7E-06 |
| 3553803 | C14orf17 | 7.08 | 6.93 | 0.20 | 0.20 | 3.4E-05 | 1.4E-04 |
| 2459487 | TRIM11   | 7.57 | 7.42 | 0.19 | 0.21 | 1.5E-05 | 7.4E-05 |
| 2489258 | ZNHIT4   | 7.59 | 7.43 | 0.26 | 0.21 | 2.1E-04 | 5.6E-04 |
| 3221988 | DFNB31   | 6.49 | 6.33 | 0.22 | 0.19 | 5.3E-06 | 3.4E-05 |
| 3846742 | SH3GL1   | 8.42 | 8.26 | 0.25 | 0.25 | 4.5E-04 | 9.6E-04 |
| 3835726 | BCL3     | 7.56 | 7.41 | 0.28 | 0.22 | 9.2E-04 | 1.6E-03 |
| 2948587 | FLOT1    | 9.08 | 8.93 | 0.23 | 0.27 | 4.5E-04 | 9.7E-04 |
| 2518155 | UBE2E3   | 7.55 | 7.40 | 0.29 | 0.28 | 2.1E-03 | 3.0E-03 |
| 3944826 | SH3BP1   | 8.00 | 7.85 | 0.30 | 0.24 | 1.9E-03 | 2.7E-03 |
| 2756782 | DGKQ     | 7.00 | 6.84 | 0.21 | 0.17 | 7.6E-05 | 2.5E-04 |
| 2829463 | CAMLG    | 8.69 | 8.54 | 0.28 | 0.33 | 1.3E-03 | 2.1E-03 |



## AJHG, Volume 82

|         |          |       |       |      |      |         |         |
|---------|----------|-------|-------|------|------|---------|---------|
| 3035795 | C7orf27  | 7.79  | 7.64  | 0.20 | 0.23 | 6.9E-05 | 2.4E-04 |
| 3874198 | OXT      | 6.76  | 6.61  | 0.24 | 0.24 | 4.0E-05 | 1.6E-04 |
| 3120021 | GPAA1    | 8.13  | 7.98  | 0.29 | 0.30 | 3.3E-03 | 4.2E-03 |
| 2950329 | HLA-DPA1 | 12.60 | 12.45 | 0.30 | 0.29 | 1.9E-03 | 2.7E-03 |
| 3643114 | C16orf14 | 7.18  | 7.03  | 0.19 | 0.21 | 9.4E-06 | 5.3E-05 |
| 3824226 | GTPBP3   | 6.83  | 6.68  | 0.19 | 0.16 | 1.8E-06 | 1.6E-05 |
| 3920385 | LOC28649 | 8.40  | 8.25  | 0.29 | 0.30 | 5.0E-03 | 5.7E-03 |
| 3836156 | MARK4    | 7.12  | 6.97  | 0.21 | 0.23 | 8.3E-05 | 2.7E-04 |
| 2842194 | CPLX2    | 6.47  | 6.31  | 0.24 | 0.27 | 2.7E-04 | 6.6E-04 |
| 2987632 | TTYH3    | 8.18  | 8.03  | 0.34 | 0.33 | 8.2E-03 | 8.3E-03 |
| 3320251 | ENST0000 | 6.67  | 6.52  | 0.36 | 0.34 | 4.6E-03 | 5.4E-03 |
| 3351895 | TMEM24   | 6.74  | 6.59  | 0.26 | 0.27 | 9.6E-04 | 1.7E-03 |
| 2960903 | LOC44059 | 8.15  | 8.00  | 0.33 | 0.33 | 7.1E-03 | 7.5E-03 |
| 3438847 | LOC64203 | 7.59  | 7.44  | 0.24 | 0.20 | 6.3E-05 | 2.2E-04 |
| 3193900 | MRPS2    | 8.68  | 8.53  | 0.25 | 0.26 | 9.0E-04 | 1.6E-03 |
| 3048749 | DDX56    | 8.65  | 8.50  | 0.33 | 0.34 | 4.7E-03 | 5.5E-03 |
| 3261723 | C10orf77 | 6.93  | 6.79  | 0.24 | 0.26 | 4.3E-04 | 9.3E-04 |
| 3735752 | SEC14L1  | 8.17  | 8.02  | 0.30 | 0.29 | 4.0E-03 | 4.8E-03 |
| 3678147 | NMRAL1   | 8.27  | 8.12  | 0.22 | 0.27 | 1.7E-04 | 4.6E-04 |
| 3965751 | MAPK12   | 7.75  | 7.60  | 0.29 | 0.30 | 6.9E-03 | 7.4E-03 |
| 3335029 | POLA2    | 8.76  | 8.61  | 0.29 | 0.33 | 4.4E-03 | 5.2E-03 |
| 3758291 | VAT1     | 7.36  | 7.21  | 0.31 | 0.23 | 1.8E-03 | 2.7E-03 |
| 3838886 | AP2A1    | 8.76  | 8.61  | 0.23 | 0.21 | 6.7E-04 | 1.3E-03 |
| 3773742 | MGC15523 | 8.65  | 8.50  | 0.27 | 0.36 | 5.2E-03 | 5.9E-03 |
| 2641032 | SEC61A1  | 10.20 | 10.05 | 0.32 | 0.28 | 3.0E-03 | 3.9E-03 |
| 3064638 | RABL5    | 7.31  | 7.16  | 0.25 | 0.25 | 4.9E-04 | 1.0E-03 |
| 3730322 | MRC2     | 6.50  | 6.35  | 0.33 | 0.30 | 2.1E-03 | 3.0E-03 |
| 3158642 | NFKBIL2  | 7.39  | 7.24  | 0.18 | 0.18 | 1.2E-05 | 6.3E-05 |
| 3617403 | LOC65100 | 9.19  | 9.04  | 0.31 | 0.31 | 5.8E-03 | 6.4E-03 |
| 2334374 | AKR1A1   | 6.82  | 6.68  | 0.30 | 0.31 | 5.4E-03 | 6.1E-03 |
| 3453513 | WNT10B   | 6.57  | 6.43  | 0.30 | 0.31 | 4.9E-04 | 1.0E-03 |
| 3157563 | NAPRT1   | 6.75  | 6.60  | 0.24 | 0.30 | 2.2E-03 | 3.1E-03 |
| 3602634 | ISL2     | 6.83  | 6.68  | 0.29 | 0.24 | 6.6E-04 | 1.3E-03 |

AJHG, Volume 82

|         |          |       |       |      |      |         |         |
|---------|----------|-------|-------|------|------|---------|---------|
| 3226181 | ST6GALNA | 8.44  | 8.29  | 0.26 | 0.21 | 3.5E-04 | 7.9E-04 |
| 3075531 | MGC14289 | 8.06  | 7.91  | 0.32 | 0.31 | 8.6E-04 | 1.5E-03 |
| 3301218 | PDLIM1   | 10.56 | 10.42 | 0.30 | 0.35 | 7.7E-03 | 7.9E-03 |
| 3950602 | PANX2    | 6.75  | 6.60  | 0.21 | 0.20 | 1.8E-05 | 8.7E-05 |
| 3847356 | PRSS15   | 8.52  | 8.37  | 0.25 | 0.24 | 2.7E-04 | 6.6E-04 |
| 3867538 | GYS1     | 8.62  | 8.47  | 0.22 | 0.29 | 2.5E-03 | 3.4E-03 |
| 3375192 | VWCE     | 6.95  | 6.81  | 0.33 | 0.27 | 1.7E-03 | 2.6E-03 |
| 2340315 | AK3L1    | 6.88  | 6.73  | 0.27 | 0.30 | 1.4E-03 | 2.2E-03 |
| 3844238 | TRIM28   | 10.61 | 10.46 | 0.24 | 0.23 | 6.8E-04 | 1.3E-03 |
| 3638590 | MESP1    | 6.95  | 6.81  | 0.25 | 0.26 | 4.1E-04 | 9.0E-04 |
| 3373845 | SLC43A3  | 10.19 | 10.04 | 0.29 | 0.29 | 2.0E-03 | 2.9E-03 |
| 2568687 | FHL2     | 6.41  | 6.26  | 0.34 | 0.30 | 2.5E-03 | 3.4E-03 |
| 3713794 | EPN2     | 7.16  | 7.01  | 0.23 | 0.24 | 2.0E-04 | 5.4E-04 |
| 2335172 | FOXD2    | 6.63  | 6.48  | 0.23 | 0.21 | 5.6E-05 | 2.0E-04 |
| 3031345 | LRRC61   | 7.73  | 7.59  | 0.33 | 0.34 | 8.2E-03 | 8.3E-03 |
| 3335338 | FAM89B   | 7.62  | 7.47  | 0.31 | 0.28 | 4.0E-03 | 4.9E-03 |
| 3329018 | SLC35C1  | 7.91  | 7.77  | 0.29 | 0.26 | 7.6E-03 | 7.8E-03 |
| 3168066 | CA9      | 6.65  | 6.51  | 0.21 | 0.22 | 3.4E-05 | 1.4E-04 |
| 2845829 | TERT     | 6.57  | 6.42  | 0.22 | 0.15 | 2.9E-06 | 2.2E-05 |
| 2675836 | ABHD14B  | 7.61  | 7.46  | 0.33 | 0.37 | 9.3E-03 | 9.2E-03 |
| 2397847 | ZBTB17   | 7.51  | 7.37  | 0.18 | 0.21 | 2.7E-05 | 1.2E-04 |
| 2408062 | BMP8B    | 8.38  | 8.23  | 0.21 | 0.22 | 9.9E-05 | 3.1E-04 |
| 2396121 | DFFA     | 8.11  | 7.96  | 0.32 | 0.31 | 5.2E-03 | 5.9E-03 |
| 3015740 | GNB2     | 8.86  | 8.71  | 0.25 | 0.26 | 1.4E-03 | 2.2E-03 |
| 3815268 | KISS1R   | 6.51  | 6.37  | 0.26 | 0.26 | 7.4E-05 | 2.5E-04 |
| 3194613 | TMEM141  | 6.90  | 6.75  | 0.29 | 0.30 | 2.7E-03 | 3.6E-03 |
| 2390489 | ZNF672   | 8.18  | 8.04  | 0.22 | 0.22 | 3.2E-05 | 1.3E-04 |
| 3816112 | SCAMP4   | 8.38  | 8.24  | 0.22 | 0.33 | 2.9E-03 | 3.8E-03 |
| 3930360 | RUNX1    | 7.42  | 7.27  | 0.39 | 0.32 | 8.4E-03 | 8.5E-03 |
| 3589947 | BAHD1    | 7.52  | 7.37  | 0.24 | 0.21 | 3.4E-04 | 7.8E-04 |
| 2567242 | LOC64387 | 7.69  | 7.55  | 0.26 | 0.29 | 2.3E-03 | 3.2E-03 |
| 2407496 | POU3F1   | 7.66  | 7.52  | 0.28 | 0.29 | 2.7E-03 | 3.6E-03 |
| 4021341 | ZDHHC9   | 7.37  | 7.23  | 0.23 | 0.24 | 5.2E-04 | 1.1E-03 |

## AJHG, Volume 82

|         |          |       |       |      |      |         |         |
|---------|----------|-------|-------|------|------|---------|---------|
| 2489411 | HTRA2    | 8.47  | 8.33  | 0.31 | 0.27 | 4.4E-03 | 5.2E-03 |
| 3646277 | MGRN1    | 8.74  | 8.60  | 0.19 | 0.16 | 9.9E-06 | 5.5E-05 |
| 3656318 | PRR14    | 8.53  | 8.39  | 0.16 | 0.17 | 4.1E-07 | 5.4E-06 |
| 2466039 | ZNF692   | 8.08  | 7.93  | 0.30 | 0.32 | 4.2E-03 | 5.1E-03 |
| 3378830 | CORO1B   | 7.66  | 7.51  | 0.31 | 0.26 | 1.3E-03 | 2.0E-03 |
| 3957260 | SF3A1    | 9.54  | 9.40  | 0.18 | 0.20 | 7.7E-06 | 4.5E-05 |
| 3000010 | DKFZp761 | 8.93  | 8.78  | 0.19 | 0.21 | 3.9E-05 | 1.5E-04 |
| 4007186 | LOC64346 | 8.14  | 8.00  | 0.30 | 0.26 | 6.4E-03 | 6.9E-03 |
| 3612166 | FLJ00038 | 7.88  | 7.74  | 0.28 | 0.32 | 1.1E-03 | 1.8E-03 |
| 3610611 | ARRDC4   | 6.88  | 6.73  | 0.29 | 0.30 | 7.9E-04 | 1.5E-03 |
| 3770588 | NT5C     | 7.56  | 7.42  | 0.31 | 0.35 | 7.9E-03 | 8.1E-03 |
| 2798538 | SDHAL1   | 10.76 | 10.62 | 0.24 | 0.33 | 4.2E-03 | 5.0E-03 |
| 3459604 | LOC64508 | 6.84  | 6.70  | 0.22 | 0.23 | 3.4E-04 | 7.8E-04 |
| 2528674 | MGC99813 | 6.55  | 6.41  | 0.19 | 0.22 | 1.6E-04 | 4.5E-04 |
| 4042392 |          | 7.28  | 7.14  | 0.17 | 0.20 | 5.5E-05 | 2.0E-04 |
| 3015769 | POP7     | 8.18  | 8.04  | 0.28 | 0.31 | 8.3E-03 | 8.4E-03 |
| 2318170 | C1orf188 | 6.96  | 6.82  | 0.21 | 0.23 | 9.5E-05 | 3.0E-04 |
| 3685306 | NDUFAB1  | 8.54  | 8.40  | 0.28 | 0.29 | 5.9E-03 | 6.5E-03 |
| 2840789 | FGF18    | 7.04  | 6.90  | 0.24 | 0.24 | 6.1E-04 | 1.2E-03 |
| 2437801 | ARHGEF2  | 8.74  | 8.60  | 0.24 | 0.23 | 2.9E-04 | 7.0E-04 |
| 2921022 | GPR6     | 6.86  | 6.72  | 0.29 | 0.29 | 3.8E-03 | 4.7E-03 |
| 3118451 | LOC64610 | 8.50  | 8.36  | 0.23 | 0.25 | 4.7E-04 | 1.0E-03 |
| 3841901 | NALP2    | 6.76  | 6.62  | 0.33 | 0.33 | 6.5E-03 | 7.0E-03 |
| 3734479 | TMEM104  | 6.99  | 6.84  | 0.21 | 0.20 | 3.2E-05 | 1.3E-04 |
| 3334415 | GPR137   | 8.02  | 7.88  | 0.21 | 0.20 | 7.4E-05 | 2.5E-04 |
| 3390860 | POU2AF1  | 9.41  | 9.27  | 0.28 | 0.27 | 3.0E-03 | 3.9E-03 |
| 3819505 | RAB11B   | 9.52  | 9.38  | 0.22 | 0.26 | 1.1E-03 | 1.8E-03 |
| 3770923 | GALK1    | 7.42  | 7.28  | 0.20 | 0.19 | 8.3E-05 | 2.7E-04 |
| 3946380 | RUTBC3   | 7.87  | 7.73  | 0.21 | 0.26 | 8.6E-04 | 1.5E-03 |
| 3332838 | DAK      | 8.48  | 8.34  | 0.22 | 0.25 | 1.3E-03 | 2.1E-03 |
| 2655168 | YEATS2   | 8.30  | 8.16  | 0.30 | 0.33 | 8.3E-03 | 8.4E-03 |
| 3554282 | C14orf15 | 7.34  | 7.20  | 0.24 | 0.29 | 1.8E-03 | 2.6E-03 |
| 3996339 | TAZ      | 8.15  | 8.01  | 0.27 | 0.29 | 4.1E-03 | 5.0E-03 |

## AJHG, Volume 82

|         |          |      |      |      |      |         |         |
|---------|----------|------|------|------|------|---------|---------|
| 3381317 | STARD10  | 7.00 | 6.86 | 0.33 | 0.30 | 8.8E-03 | 8.8E-03 |
| 3676356 | ZNF598   | 7.75 | 7.61 | 0.18 | 0.19 | 2.4E-06 | 2.0E-05 |
| 3704980 | FANCA    | 7.81 | 7.67 | 0.24 | 0.27 | 1.4E-03 | 2.3E-03 |
| 3003228 | SUMF2    | 9.45 | 9.31 | 0.25 | 0.32 | 6.7E-03 | 7.1E-03 |
| 3656362 | FBS1     | 8.30 | 8.17 | 0.26 | 0.21 | 1.1E-03 | 1.8E-03 |
| 2621949 | C3orf60  | 7.64 | 7.50 | 0.25 | 0.25 | 6.1E-04 | 1.2E-03 |
| 3863021 | TGFB1    | 9.45 | 9.31 | 0.26 | 0.27 | 1.9E-03 | 2.8E-03 |
| 3675858 | C16orf28 | 7.07 | 6.93 | 0.19 | 0.17 | 2.3E-05 | 1.0E-04 |
| 2611546 | FBLN2    | 8.26 | 8.12 | 0.25 | 0.25 | 7.5E-04 | 1.4E-03 |
| 2327391 | SESN2    | 8.52 | 8.38 | 0.29 | 0.31 | 8.1E-03 | 8.3E-03 |
| 3150060 | EXT1     | 6.81 | 6.67 | 0.28 | 0.29 | 3.5E-03 | 4.4E-03 |
| 3851603 | DHPS     | 8.23 | 8.09 | 0.30 | 0.32 | 7.4E-03 | 7.8E-03 |
| 3851651 | TNPO2    | 8.66 | 8.53 | 0.18 | 0.20 | 3.3E-05 | 1.4E-04 |
| 2621451 | DHX30    | 8.23 | 8.10 | 0.18 | 0.28 | 6.8E-04 | 1.3E-03 |
| 3642604 | MPG      | 7.76 | 7.62 | 0.21 | 0.20 | 1.2E-04 | 3.6E-04 |
| 2757540 | WHSC2    | 7.83 | 7.69 | 0.19 | 0.21 | 8.6E-05 | 2.8E-04 |
| 2846522 | IRX2     | 6.71 | 6.57 | 0.32 | 0.33 | 6.5E-03 | 7.0E-03 |
| 3158114 | SHARPIN  | 8.45 | 8.31 | 0.21 | 0.19 | 1.4E-04 | 4.1E-04 |
| 3880175 | NXT1     | 7.10 | 6.96 | 0.31 | 0.26 | 2.8E-03 | 3.7E-03 |
| 3430926 | UNG      | 7.89 | 7.76 | 0.28 | 0.24 | 2.8E-03 | 3.7E-03 |
| 3819312 | SNAPC2   | 8.08 | 7.94 | 0.22 | 0.25 | 1.2E-03 | 2.0E-03 |
| 3818897 | NTE      | 8.14 | 8.01 | 0.24 | 0.28 | 5.1E-03 | 5.8E-03 |
| 3758928 | C17orf65 | 7.09 | 6.95 | 0.27 | 0.29 | 2.1E-03 | 3.0E-03 |
| 3035281 | INTS1    | 8.12 | 7.98 | 0.19 | 0.21 | 2.4E-04 | 6.0E-04 |
| 3841310 | TSEN34   | 6.89 | 6.75 | 0.21 | 0.22 | 2.1E-04 | 5.4E-04 |
| 3883971 | C20orf24 | 7.68 | 7.55 | 0.30 | 0.23 | 1.0E-03 | 1.8E-03 |
| 2907730 | SRF      | 8.92 | 8.79 | 0.21 | 0.22 | 1.5E-04 | 4.3E-04 |
| 3779612 | C18orf43 | 6.38 | 6.24 | 0.20 | 0.21 | 4.6E-05 | 1.7E-04 |
| 3655877 | CCDC95   | 7.67 | 7.54 | 0.21 | 0.21 | 9.0E-05 | 2.8E-04 |
| 3031754 | ABCB8    | 7.36 | 7.23 | 0.17 | 0.21 | 1.1E-04 | 3.4E-04 |
| 3401217 | TULP3    | 6.91 | 6.77 | 0.31 | 0.30 | 5.4E-03 | 6.1E-03 |
| 3642946 | LOC65365 | 7.72 | 7.59 | 0.18 | 0.18 | 5.8E-05 | 2.0E-04 |
| 2982028 | RSHL2    | 6.47 | 6.33 | 0.19 | 0.18 | 1.3E-06 | 1.3E-05 |

AJHG, Volume 82

|         |          |       |       |      |      |         |         |
|---------|----------|-------|-------|------|------|---------|---------|
| 3864445 | IRGQ     | 8.26  | 8.13  | 0.23 | 0.24 | 7.6E-04 | 1.4E-03 |
| 2863451 | ZBED3    | 7.52  | 7.38  | 0.19 | 0.20 | 1.8E-04 | 4.9E-04 |
| 3743440 | DVL2     | 7.91  | 7.77  | 0.18 | 0.18 | 3.3E-05 | 1.4E-04 |
| 4009315 | HUWE1    | 10.16 | 10.02 | 0.22 | 0.21 | 3.2E-04 | 7.4E-04 |
| 3707095 | ARRB2    | 8.28  | 8.14  | 0.29 | 0.24 | 4.2E-03 | 5.0E-03 |
| 3376779 | TRPT1    | 8.25  | 8.12  | 0.26 | 0.22 | 9.9E-04 | 1.7E-03 |
| 3665230 | HSF4     | 6.89  | 6.75  | 0.17 | 0.17 | 3.9E-05 | 1.5E-04 |
| 3846316 | PIP5K1C  | 7.89  | 7.76  | 0.29 | 0.25 | 4.0E-03 | 4.9E-03 |
| 3761989 | FAM117A  | 7.91  | 7.77  | 0.22 | 0.23 | 9.7E-04 | 1.7E-03 |
| 4053462 | KLHL17   | 6.78  | 6.64  | 0.17 | 0.17 | 2.6E-06 | 2.0E-05 |
| 2326912 | WDTC1    | 7.96  | 7.82  | 0.26 | 0.22 | 6.6E-04 | 1.3E-03 |
| 3642875 | RAB11FIP | 7.34  | 7.20  | 0.17 | 0.17 | 4.0E-05 | 1.5E-04 |
| 3339880 | TNFRSF19 | 7.68  | 7.54  | 0.22 | 0.27 | 1.5E-03 | 2.3E-03 |
| 2672712 | SCAP     | 8.16  | 8.02  | 0.20 | 0.18 | 1.2E-04 | 3.4E-04 |
| 3719231 | MRM1     | 7.02  | 6.88  | 0.22 | 0.25 | 2.3E-03 | 3.2E-03 |
| 3965833 | SBF1     | 8.35  | 8.21  | 0.20 | 0.25 | 1.9E-03 | 2.8E-03 |
| 2540007 | CYS1     | 7.75  | 7.62  | 0.28 | 0.23 | 2.2E-03 | 3.1E-03 |
| 3379031 | NUDT8    | 7.71  | 7.57  | 0.28 | 0.23 | 2.2E-04 | 5.7E-04 |
| 3904333 | SCAND1   | 7.00  | 6.86  | 0.25 | 0.25 | 1.9E-03 | 2.7E-03 |
| 3334257 | URP2     | 10.18 | 10.04 | 0.22 | 0.24 | 2.3E-03 | 3.2E-03 |
| 2315739 | PUSL1    | 7.20  | 7.07  | 0.28 | 0.28 | 4.2E-03 | 5.1E-03 |
| 3642687 | HBQ1     | 7.53  | 7.40  | 0.26 | 0.25 | 6.0E-04 | 1.2E-03 |
| 3648247 | MGC24665 | 8.51  | 8.37  | 0.20 | 0.24 | 1.4E-04 | 3.9E-04 |
| 3839499 | ACPT     | 6.74  | 6.61  | 0.30 | 0.24 | 1.2E-03 | 2.0E-03 |
| 3647421 | ABAT     | 7.42  | 7.29  | 0.30 | 0.33 | 5.5E-03 | 6.2E-03 |
| 3937252 | ZDHHC8   | 7.42  | 7.28  | 0.17 | 0.14 | 5.9E-06 | 3.8E-05 |
| 3978999 | UBQLN2   | 8.72  | 8.59  | 0.19 | 0.20 | 2.3E-04 | 5.9E-04 |
| 2607055 | PASK     | 7.83  | 7.70  | 0.22 | 0.31 | 6.0E-03 | 6.6E-03 |
| 3944873 | PDXP     | 7.86  | 7.73  | 0.18 | 0.21 | 3.0E-04 | 7.2E-04 |
| 3226369 | CIZ1     | 8.47  | 8.33  | 0.17 | 0.20 | 5.2E-05 | 1.9E-04 |
| 3380142 | FGF4     | 7.78  | 7.64  | 0.20 | 0.21 | 2.0E-05 | 9.0E-05 |
| 3861272 | PPP1R14A | 6.72  | 6.59  | 0.26 | 0.23 | 2.5E-03 | 3.4E-03 |
| 3816153 | CSNK1G2  | 9.30  | 9.17  | 0.21 | 0.21 | 5.4E-04 | 1.1E-03 |

## AJHG, Volume 82

|         |          |      |      |      |      |         |         |
|---------|----------|------|------|------|------|---------|---------|
| 3378895 | PITPNM1  | 7.93 | 7.80 | 0.27 | 0.22 | 6.3E-03 | 6.8E-03 |
| 3656635 | FBXL19   | 7.73 | 7.60 | 0.17 | 0.15 | 4.5E-06 | 3.1E-05 |
| 3945014 | GCAT     | 7.02 | 6.88 | 0.29 | 0.23 | 1.4E-03 | 2.2E-03 |
| 3883819 | DLGAP4   | 7.87 | 7.74 | 0.24 | 0.22 | 1.3E-03 | 2.0E-03 |
| 3743501 | C9orf38  | 8.06 | 7.93 | 0.24 | 0.22 | 5.1E-04 | 1.1E-03 |
| 3824713 | ARRDC2   | 7.22 | 7.09 | 0.25 | 0.26 | 1.4E-03 | 2.2E-03 |
| 3847814 | KHSRP    | 8.28 | 8.15 | 0.19 | 0.21 | 1.6E-04 | 4.4E-04 |
| 3239760 | APBB1IP  | 8.49 | 8.36 | 0.30 | 0.30 | 5.7E-03 | 6.4E-03 |
| 3847703 | MLLT1    | 8.13 | 8.00 | 0.21 | 0.16 | 2.3E-04 | 5.8E-04 |
| 3844744 | PRSSL1   | 6.64 | 6.51 | 0.27 | 0.23 | 5.3E-04 | 1.1E-03 |
| 3847420 | DUS3L    | 7.64 | 7.51 | 0.23 | 0.21 | 5.1E-04 | 1.1E-03 |
| 3601840 | CSK      | 9.72 | 9.59 | 0.25 | 0.22 | 2.0E-03 | 2.9E-03 |
| 3230894 | RP11-350 | 6.86 | 6.73 | 0.26 | 0.26 | 5.5E-03 | 6.2E-03 |
| 3377474 | SYVN1    | 9.02 | 8.89 | 0.33 | 0.27 | 6.5E-03 | 7.0E-03 |
| 2673873 | IMPDH2   | 9.97 | 9.83 | 0.29 | 0.31 | 8.7E-03 | 8.7E-03 |
| 3953033 | HTF9C    | 8.01 | 7.88 | 0.20 | 0.22 | 4.0E-04 | 8.9E-04 |
| 2324616 | HSPC157  | 7.09 | 6.96 | 0.24 | 0.29 | 8.6E-03 | 8.7E-03 |
| 2359646 | LOR      | 7.12 | 6.99 | 0.27 | 0.29 | 2.7E-04 | 6.6E-04 |
| 3844781 | PRG2     | 6.96 | 6.83 | 0.20 | 0.20 | 5.8E-05 | 2.0E-04 |
| 3918429 | OLIG1    | 6.89 | 6.76 | 0.23 | 0.25 | 4.5E-04 | 9.6E-04 |
| 3158011 | PARP10   | 8.25 | 8.12 | 0.20 | 0.23 | 1.2E-03 | 2.0E-03 |
| 3886532 | PKIG     | 7.97 | 7.84 | 0.23 | 0.26 | 1.2E-03 | 2.0E-03 |
| 3676421 | LOC33904 | 7.35 | 7.22 | 0.17 | 0.16 | 3.7E-05 | 1.4E-04 |
| 3817733 | JMJD2B   | 7.93 | 7.80 | 0.18 | 0.22 | 2.7E-04 | 6.5E-04 |
| 3358393 | PDDC1    | 6.98 | 6.85 | 0.25 | 0.23 | 1.4E-03 | 2.2E-03 |
| 3377456 | ZNHIT2   | 6.97 | 6.84 | 0.22 | 0.18 | 1.5E-04 | 4.3E-04 |
| 3463056 | CSRP2    | 6.91 | 6.78 | 0.30 | 0.34 | 6.7E-03 | 7.1E-03 |
| 2621122 | NBEAL2   | 8.87 | 8.74 | 0.24 | 0.28 | 3.8E-03 | 4.7E-03 |
| 2330843 | MANEAL   | 6.87 | 6.74 | 0.22 | 0.20 | 8.9E-05 | 2.8E-04 |
| 3861658 | FLJ45909 | 7.42 | 7.29 | 0.29 | 0.31 | 9.2E-03 | 9.1E-03 |
| 3850817 | RAB3D    | 7.41 | 7.28 | 0.25 | 0.29 | 7.2E-03 | 7.6E-03 |
| 3675285 | WDR24    | 7.20 | 7.07 | 0.22 | 0.25 | 1.8E-03 | 2.7E-03 |
| 3873185 | C20orf18 | 8.96 | 8.83 | 0.25 | 0.24 | 3.3E-03 | 4.2E-03 |

## AJHG, Volume 82

|         |          |      |      |      |      |         |         |
|---------|----------|------|------|------|------|---------|---------|
| 3378957 | CABP2    | 6.87 | 6.74 | 0.23 | 0.28 | 3.8E-03 | 4.7E-03 |
| 3713874 | MAPK7    | 6.96 | 6.83 | 0.21 | 0.22 | 9.4E-05 | 2.9E-04 |
| 3962000 | PMM1     | 7.63 | 7.50 | 0.22 | 0.25 | 3.1E-03 | 4.1E-03 |
| 3846667 | SIRT6    | 7.22 | 7.10 | 0.23 | 0.23 | 1.4E-03 | 2.2E-03 |
| 3825496 | ARMC6    | 8.36 | 8.23 | 0.23 | 0.30 | 6.6E-03 | 7.1E-03 |
| 3192954 | ADAMTS13 | 6.66 | 6.53 | 0.31 | 0.30 | 6.0E-03 | 6.6E-03 |
| 3953524 | SCARF2   | 6.47 | 6.34 | 0.20 | 0.21 | 1.4E-04 | 3.9E-04 |
| 2770427 | C4orf14  | 7.73 | 7.61 | 0.25 | 0.28 | 4.4E-03 | 5.2E-03 |
| 3432641 | C12orf52 | 7.55 | 7.42 | 0.23 | 0.28 | 4.6E-03 | 5.4E-03 |
| 3016380 | CUTL1    | 7.49 | 7.36 | 0.26 | 0.26 | 3.0E-03 | 3.9E-03 |
| 3866135 | PRKD2    | 8.68 | 8.55 | 0.23 | 0.23 | 1.7E-03 | 2.6E-03 |
| 3378210 | BRMS1    | 7.42 | 7.29 | 0.21 | 0.25 | 8.4E-04 | 1.5E-03 |
| 3912718 | TAF4     | 7.74 | 7.62 | 0.16 | 0.17 | 7.0E-06 | 4.3E-05 |
| 4049862 | EIF4EBP1 | 7.96 | 7.83 | 0.27 | 0.23 | 1.2E-03 | 2.0E-03 |
| 3883941 | TGIF2    | 8.62 | 8.49 | 0.25 | 0.32 | 9.5E-03 | 9.3E-03 |
| 3358262 | LOC65259 | 7.57 | 7.45 | 0.21 | 0.22 | 1.3E-03 | 2.0E-03 |
| 3417988 | NXPH4    | 6.48 | 6.35 | 0.21 | 0.23 | 1.1E-04 | 3.4E-04 |
| 2662397 | RPUSD3   | 8.33 | 8.20 | 0.22 | 0.25 | 1.8E-03 | 2.6E-03 |
| 3335952 | PACS1    | 9.05 | 8.93 | 0.23 | 0.21 | 8.9E-04 | 1.6E-03 |
| 3358950 | CTSD     | 9.04 | 8.91 | 0.24 | 0.28 | 4.4E-03 | 5.2E-03 |
| 3820865 | CARM1    | 9.42 | 9.29 | 0.26 | 0.22 | 3.6E-03 | 4.4E-03 |
| 3190151 | SLC25A25 | 7.13 | 7.01 | 0.28 | 0.30 | 7.5E-03 | 7.8E-03 |
| 3707214 | PLD2     | 6.91 | 6.79 | 0.22 | 0.23 | 1.5E-03 | 2.3E-03 |
| 3643143 | KIAA1924 | 7.39 | 7.27 | 0.16 | 0.17 | 4.5E-05 | 1.7E-04 |
| 3818076 | RPL36    | 7.87 | 7.75 | 0.22 | 0.24 | 1.1E-03 | 1.8E-03 |
| 3818860 | MCOLN1   | 7.36 | 7.23 | 0.18 | 0.26 | 1.7E-03 | 2.6E-03 |
| 3649890 | ABCC1    | 9.03 | 8.90 | 0.21 | 0.23 | 1.2E-03 | 2.0E-03 |
| 3057650 | YWHAG    | 8.70 | 8.57 | 0.21 | 0.19 | 4.5E-04 | 9.7E-04 |
| 3359121 | C11orf43 | 6.53 | 6.41 | 0.26 | 0.32 | 9.8E-03 | 9.5E-03 |
| 3950726 | LOC65287 | 8.21 | 8.08 | 0.19 | 0.22 | 9.3E-04 | 1.6E-03 |
| 2447066 | GLUL     | 6.64 | 6.51 | 0.36 | 0.27 | 9.9E-03 | 9.5E-03 |
| 3965784 | MAPK11   | 6.55 | 6.42 | 0.19 | 0.17 | 1.6E-04 | 4.4E-04 |
| 2724377 | WDR5     | 7.15 | 7.03 | 0.29 | 0.22 | 2.4E-03 | 3.3E-03 |

## AJHG, Volume 82

|         |          |       |       |      |      |         |         |
|---------|----------|-------|-------|------|------|---------|---------|
| 3954294 | PPM1F    | 7.25  | 7.12  | 0.16 | 0.17 | 3.3E-06 | 2.4E-05 |
| 3224650 | DENND1A  | 8.37  | 8.24  | 0.28 | 0.26 | 4.3E-03 | 5.2E-03 |
| 2723752 | TBC1D1   | 8.53  | 8.41  | 0.32 | 0.29 | 8.8E-03 | 8.8E-03 |
| 3454092 | KIAA1602 | 6.90  | 6.78  | 0.25 | 0.19 | 1.2E-03 | 2.0E-03 |
| 3866117 | MGC15476 | 7.33  | 7.20  | 0.27 | 0.25 | 2.4E-03 | 3.3E-03 |
| 3192117 | KIAA0515 | 9.30  | 9.18  | 0.19 | 0.23 | 5.1E-04 | 1.1E-03 |
| 3708508 | KCTD11   | 7.01  | 6.89  | 0.23 | 0.27 | 1.1E-03 | 1.8E-03 |
| 2326640 | ARID1A   | 8.67  | 8.54  | 0.22 | 0.19 | 4.9E-04 | 1.0E-03 |
| 2891052 | SNORD96A | 12.62 | 12.49 | 0.19 | 0.22 | 3.7E-04 | 8.3E-04 |
| 2675088 | IFRD2    | 7.94  | 7.82  | 0.23 | 0.21 | 2.2E-03 | 3.1E-03 |
| 3303478 | SEC31L2  | 6.69  | 6.57  | 0.24 | 0.19 | 7.1E-04 | 1.3E-03 |
| 3233182 | NET1     | 7.56  | 7.43  | 0.20 | 0.21 | 1.1E-04 | 3.4E-04 |
| 2318157 | FLJ46380 | 6.50  | 6.38  | 0.20 | 0.21 | 1.6E-04 | 4.4E-04 |
| 2655438 | DVL3     | 8.41  | 8.29  | 0.15 | 0.13 | 3.5E-06 | 2.6E-05 |
| 3157751 | SCRIB    | 7.67  | 7.54  | 0.15 | 0.16 | 1.3E-05 | 6.8E-05 |
| 3719210 | MRM1     | 6.93  | 6.81  | 0.29 | 0.27 | 9.9E-03 | 9.6E-03 |
| 3923608 | AIRE     | 7.13  | 7.01  | 0.32 | 0.33 | 4.1E-03 | 5.0E-03 |
| 2400793 | HSPG2    | 6.56  | 6.43  | 0.16 | 0.13 | 2.4E-06 | 1.9E-05 |
| 2467691 | TTC15    | 7.51  | 7.39  | 0.23 | 0.23 | 6.8E-04 | 1.3E-03 |
| 2700828 | SIAH2    | 8.19  | 8.07  | 0.23 | 0.24 | 3.7E-04 | 8.3E-04 |
| 3946762 | ZC3H7B   | 8.15  | 8.03  | 0.20 | 0.18 | 1.6E-04 | 4.4E-04 |
| 3316311 | EFCAB4A  | 7.10  | 6.97  | 0.22 | 0.19 | 6.6E-04 | 1.3E-03 |
| 2408244 | COL9A2   | 7.05  | 6.93  | 0.20 | 0.20 | 3.1E-04 | 7.4E-04 |
| 2391302 | CENTB5   | 7.61  | 7.49  | 0.13 | 0.15 | 1.1E-06 | 1.1E-05 |
| 3737242 | SLC26A11 | 6.68  | 6.56  | 0.16 | 0.16 | 1.2E-05 | 6.3E-05 |
| 3592109 | LOC65235 | 8.38  | 8.25  | 0.24 | 0.25 | 8.0E-04 | 1.5E-03 |
| 2438207 | MEF2D    | 8.75  | 8.63  | 0.25 | 0.24 | 5.4E-03 | 6.1E-03 |
| 2409507 | SLC6A9   | 7.21  | 7.09  | 0.22 | 0.23 | 9.8E-04 | 1.7E-03 |
| 3950832 | ADM2     | 7.03  | 6.90  | 0.22 | 0.20 | 1.3E-03 | 2.1E-03 |
| 3997946 | LOC64452 | 8.55  | 8.43  | 0.24 | 0.21 | 4.9E-03 | 5.7E-03 |
| 3888850 | BCAS4    | 8.18  | 8.05  | 0.27 | 0.29 | 6.0E-03 | 6.6E-03 |
| 2835213 | PPARGC1B | 7.60  | 7.48  | 0.17 | 0.17 | 4.2E-05 | 1.6E-04 |
| 2565099 | ASTL     | 6.45  | 6.32  | 0.23 | 0.27 | 1.2E-03 | 1.9E-03 |



## AJHG, Volume 82

|         |          |       |       |      |      |         |         |
|---------|----------|-------|-------|------|------|---------|---------|
| 3845210 | C19orf25 | 7.33  | 7.21  | 0.30 | 0.31 | 8.0E-03 | 8.2E-03 |
| 3853942 | CHERP    | 8.58  | 8.46  | 0.16 | 0.15 | 6.5E-07 | 7.6E-06 |
| 3766415 | SMARCD2  | 8.99  | 8.87  | 0.24 | 0.25 | 8.1E-03 | 8.3E-03 |
| 3371303 | PEX16    | 7.94  | 7.82  | 0.23 | 0.27 | 1.0E-02 | 1.0E-02 |
| 3331262 | RTN4RL2  | 7.26  | 7.14  | 0.27 | 0.26 | 3.0E-03 | 3.9E-03 |
| 3863504 | DEDD2    | 7.57  | 7.44  | 0.21 | 0.25 | 6.0E-04 | 1.2E-03 |
| 3432030 | ACAD10   | 7.04  | 6.91  | 0.20 | 0.26 | 1.3E-03 | 2.0E-03 |
| 3553389 | AMN      | 6.86  | 6.74  | 0.20 | 0.24 | 1.8E-04 | 4.8E-04 |
| 2983030 | AGPAT4   | 6.38  | 6.26  | 0.25 | 0.25 | 5.9E-03 | 6.5E-03 |
| 3158609 | VPS28    | 8.25  | 8.12  | 0.22 | 0.20 | 1.6E-03 | 2.4E-03 |
| 2350880 | AMPD2    | 7.88  | 7.75  | 0.25 | 0.25 | 3.3E-03 | 4.2E-03 |
| 2403707 | TTMB     | 7.22  | 7.10  | 0.23 | 0.22 | 1.3E-03 | 2.1E-03 |
| 4000704 | LOC65365 | 8.44  | 8.32  | 0.24 | 0.21 | 2.0E-03 | 2.9E-03 |
| 3190210 | C9orf16  | 8.82  | 8.70  | 0.23 | 0.25 | 3.7E-03 | 4.6E-03 |
| 2805939 | RXFP3    | 6.33  | 6.21  | 0.22 | 0.21 | 5.3E-04 | 1.1E-03 |
| 3271018 | TXNL2    | 9.18  | 9.06  | 0.17 | 0.17 | 1.0E-04 | 3.2E-04 |
| 3965936 | TMEM153  | 8.19  | 8.07  | 0.23 | 0.25 | 4.6E-03 | 5.4E-03 |
| 3608466 | MAN2A2   | 7.73  | 7.60  | 0.30 | 0.26 | 6.8E-03 | 7.3E-03 |
| 3836057 | LOC14324 | 7.08  | 6.96  | 0.22 | 0.20 | 1.3E-04 | 3.8E-04 |
| 3866339 | FLJ20512 | 8.42  | 8.29  | 0.24 | 0.22 | 1.4E-03 | 2.2E-03 |
| 3693240 | CCDC102A | 6.61  | 6.49  | 0.27 | 0.24 | 4.5E-03 | 5.3E-03 |
| 2949148 | BAT3     | 9.51  | 9.39  | 0.22 | 0.26 | 2.9E-03 | 3.9E-03 |
| 2663551 | NUP210   | 9.99  | 9.87  | 0.24 | 0.20 | 1.8E-03 | 2.7E-03 |
| 3952825 | FLJ21125 | 6.76  | 6.64  | 0.19 | 0.18 | 8.3E-05 | 2.7E-04 |
| 3816919 | NFIC     | 8.01  | 7.88  | 0.25 | 0.24 | 4.2E-03 | 5.0E-03 |
| 3643892 | KIAA0683 | 7.77  | 7.65  | 0.20 | 0.19 | 8.9E-04 | 1.6E-03 |
| 2907444 | PTCRA    | 7.12  | 6.99  | 0.19 | 0.22 | 4.8E-04 | 1.0E-03 |
| 2843579 | RMND5B   | 8.57  | 8.45  | 0.25 | 0.32 | 8.6E-03 | 8.7E-03 |
| 3226644 | ZDHHC12  | 8.23  | 8.11  | 0.26 | 0.27 | 9.4E-03 | 9.3E-03 |
| 3285119 | FZD8     | 6.94  | 6.82  | 0.24 | 0.23 | 2.1E-03 | 3.0E-03 |
| 3119656 | GSDMDC1  | 6.89  | 6.77  | 0.16 | 0.16 | 2.5E-05 | 1.1E-04 |
| 3816333 | SF3A2    | 8.61  | 8.49  | 0.23 | 0.24 | 5.2E-03 | 5.9E-03 |
| 3022465 | NAG8     | 10.72 | 10.60 | 0.20 | 0.22 | 7.0E-04 | 1.3E-03 |

## AJHG, Volume 82

|         |          |      |      |      |      |         |         |
|---------|----------|------|------|------|------|---------|---------|
| 3852735 | PTGER1   | 6.57 | 6.45 | 0.17 | 0.19 | 6.6E-05 | 2.3E-04 |
| 3336576 | LRFN4    | 6.86 | 6.74 | 0.22 | 0.20 | 6.9E-04 | 1.3E-03 |
| 2621881 | PH-4     | 7.64 | 7.52 | 0.22 | 0.23 | 1.1E-03 | 1.9E-03 |
| 4027009 | IRAK1    | 8.34 | 8.22 | 0.23 | 0.22 | 4.5E-03 | 5.3E-03 |
| 3195083 | C9orf142 | 7.43 | 7.31 | 0.21 | 0.21 | 1.1E-03 | 1.8E-03 |
| 3075742 | FLJ44186 | 7.00 | 6.88 | 0.26 | 0.25 | 1.8E-03 | 2.7E-03 |
| 3015241 | AP4M1    | 7.30 | 7.18 | 0.21 | 0.23 | 1.1E-03 | 1.9E-03 |
| 3738471 | RAC3     | 6.85 | 6.73 | 0.20 | 0.20 | 3.2E-04 | 7.4E-04 |
| 3377789 | RELA     | 9.22 | 9.10 | 0.18 | 0.26 | 1.3E-03 | 2.1E-03 |
| 3965631 | TUBGCP6  | 7.68 | 7.57 | 0.18 | 0.21 | 1.3E-03 | 2.1E-03 |
| 3357885 | SIGIRR   | 6.87 | 6.75 | 0.22 | 0.22 | 1.8E-03 | 2.7E-03 |
| 3903052 | SNTA1    | 6.54 | 6.42 | 0.27 | 0.24 | 4.6E-03 | 5.4E-03 |
| 3865635 | DMPK     | 7.51 | 7.39 | 0.18 | 0.18 | 5.0E-04 | 1.0E-03 |
| 3852407 | RFX1     | 6.75 | 6.63 | 0.13 | 0.11 | 7.7E-08 | 1.6E-06 |
| 2361241 | MAPBPIP  | 6.66 | 6.54 | 0.25 | 0.27 | 5.4E-03 | 6.1E-03 |
| 2335160 | FOXE3    | 6.74 | 6.62 | 0.27 | 0.29 | 8.6E-03 | 8.7E-03 |
| 2494579 | ARID5A   | 6.96 | 6.84 | 0.25 | 0.20 | 1.1E-03 | 1.9E-03 |
| 3846011 | SGTA     | 8.48 | 8.36 | 0.25 | 0.22 | 3.2E-03 | 4.1E-03 |
| 3064574 | CLDN15   | 6.91 | 6.79 | 0.19 | 0.20 | 4.3E-04 | 9.4E-04 |
| 3414561 | DIP2B    | 8.71 | 8.59 | 0.27 | 0.25 | 9.0E-03 | 9.0E-03 |
| 2458607 | PYCR2    | 8.77 | 8.65 | 0.24 | 0.24 | 3.0E-03 | 3.9E-03 |
| 3601348 | LOXL1    | 6.75 | 6.63 | 0.22 | 0.21 | 9.3E-04 | 1.6E-03 |
| 3844704 | RNF126   | 8.20 | 8.08 | 0.22 | 0.25 | 4.9E-03 | 5.6E-03 |
| 3161398 | UHRF2    | 8.35 | 8.23 | 0.24 | 0.21 | 1.3E-03 | 2.1E-03 |
| 3774331 | THOC4    | 7.07 | 6.95 | 0.23 | 0.27 | 5.3E-03 | 6.0E-03 |
| 3760894 | OSBPL7   | 7.09 | 6.97 | 0.14 | 0.16 | 4.1E-05 | 1.6E-04 |
| 3402398 | PLEKHG6  | 6.49 | 6.37 | 0.31 | 0.19 | 6.5E-03 | 7.0E-03 |
| 3934642 | KRTAP12- | 6.68 | 6.56 | 0.29 | 0.27 | 4.9E-03 | 5.7E-03 |
| 3414632 | DIP2B    | 8.58 | 8.46 | 0.23 | 0.28 | 5.8E-03 | 6.4E-03 |
| 2360506 | ZBTB7B   | 8.04 | 7.92 | 0.29 | 0.18 | 6.0E-03 | 6.6E-03 |
| 2714407 | IDUA     | 7.42 | 7.31 | 0.21 | 0.20 | 1.1E-03 | 1.9E-03 |
| 3850576 | YIPF2    | 7.61 | 7.49 | 0.23 | 0.22 | 3.4E-03 | 4.3E-03 |
| 2536625 | BOK      | 6.91 | 6.80 | 0.22 | 0.20 | 1.4E-03 | 2.2E-03 |

## AJHG, Volume 82

|         |          |      |      |      |      |         |         |
|---------|----------|------|------|------|------|---------|---------|
| 3771091 | TRIM65   | 7.09 | 6.98 | 0.20 | 0.20 | 5.4E-04 | 1.1E-03 |
| 3456212 | MAP3K12  | 6.63 | 6.51 | 0.26 | 0.19 | 3.5E-03 | 4.4E-03 |
| 3865301 | ERCC2    | 7.67 | 7.55 | 0.22 | 0.24 | 5.5E-03 | 6.2E-03 |
| 3377669 | LTBP3    | 6.79 | 6.68 | 0.19 | 0.16 | 3.0E-05 | 1.3E-04 |
| 3830864 | SNX26    | 6.61 | 6.49 | 0.14 | 0.14 | 1.9E-06 | 1.7E-05 |
| 2604953 | ASB18    | 6.71 | 6.59 | 0.20 | 0.19 | 9.0E-05 | 2.8E-04 |
| 3871557 | ZNF579   | 6.89 | 6.77 | 0.20 | 0.22 | 7.7E-04 | 1.4E-03 |
| 3554906 | TMEM121  | 6.93 | 6.81 | 0.22 | 0.22 | 9.6E-04 | 1.7E-03 |
| 3035464 | MAD1L1   | 7.62 | 7.51 | 0.18 | 0.21 | 4.2E-04 | 9.1E-04 |
| 3748026 | LOC65024 | 7.28 | 7.16 | 0.24 | 0.24 | 1.7E-03 | 2.5E-03 |
| 3942681 | SMTN     | 7.05 | 6.93 | 0.18 | 0.16 | 2.4E-04 | 6.1E-04 |
| 3119236 | C8orf55  | 7.37 | 7.25 | 0.24 | 0.25 | 4.5E-03 | 5.3E-03 |
| 3572164 | RPS6KL1  | 6.46 | 6.35 | 0.17 | 0.19 | 5.1E-05 | 1.9E-04 |
| 3250726 | KIAA1274 | 7.67 | 7.56 | 0.24 | 0.31 | 6.6E-03 | 7.1E-03 |
| 2359377 | LCE2A    | 7.29 | 7.18 | 0.27 | 0.28 | 6.4E-03 | 6.9E-03 |
| 3231157 | ZMYND19  | 7.53 | 7.42 | 0.22 | 0.22 | 1.8E-03 | 2.7E-03 |
| 3557791 | C14orf12 | 7.50 | 7.38 | 0.21 | 0.20 | 1.2E-03 | 2.0E-03 |
| 3935374 | C21orf58 | 6.90 | 6.79 | 0.18 | 0.19 | 1.2E-04 | 3.6E-04 |
| 3580357 | ANKRD9   | 6.42 | 6.31 | 0.22 | 0.19 | 1.1E-03 | 1.8E-03 |
| 3358401 | SLC25A22 | 7.84 | 7.72 | 0.18 | 0.17 | 2.5E-04 | 6.3E-04 |
| 2459438 | MRPL55   | 7.15 | 7.03 | 0.17 | 0.19 | 1.8E-04 | 4.8E-04 |
| 3892456 | SS18L1   | 6.47 | 6.35 | 0.15 | 0.13 | 1.5E-06 | 1.4E-05 |
| 3643333 | METRN    | 7.35 | 7.23 | 0.25 | 0.25 | 6.2E-03 | 6.7E-03 |
| 3836432 | QPCTL    | 8.02 | 7.90 | 0.24 | 0.26 | 5.5E-03 | 6.2E-03 |
| 3319613 | MGC10850 | 7.44 | 7.33 | 0.19 | 0.20 | 2.6E-04 | 6.4E-04 |
| 3358090 | HRAS     | 7.90 | 7.78 | 0.24 | 0.23 | 5.6E-03 | 6.3E-03 |
| 2674653 | GMPPB    | 7.76 | 7.64 | 0.21 | 0.22 | 1.9E-03 | 2.8E-03 |
| 3850859 | RGL3     | 6.97 | 6.85 | 0.23 | 0.26 | 1.8E-03 | 2.7E-03 |
| 3662545 | LOC64434 | 9.98 | 9.86 | 0.21 | 0.22 | 2.7E-03 | 3.6E-03 |
| 3824259 | SLC27A1  | 6.49 | 6.38 | 0.16 | 0.15 | 3.4E-05 | 1.4E-04 |
| 3643347 | C16orf24 | 8.00 | 7.88 | 0.24 | 0.23 | 2.2E-03 | 3.1E-03 |
| 2437273 | C1orf2   | 7.97 | 7.85 | 0.15 | 0.15 | 1.5E-05 | 7.6E-05 |
| 3819200 | EVI5L    | 6.91 | 6.79 | 0.20 | 0.25 | 2.1E-03 | 3.0E-03 |

## AJHG, Volume 82

|         |          |       |       |      |      |         |         |
|---------|----------|-------|-------|------|------|---------|---------|
| 3351498 | TMEM25   | 6.43  | 6.32  | 0.21 | 0.20 | 1.4E-03 | 2.2E-03 |
| 3833728 | ITPKC    | 6.34  | 6.22  | 0.18 | 0.17 | 4.3E-05 | 1.6E-04 |
| 3960356 | BAIAP2L2 | 6.32  | 6.20  | 0.15 | 0.17 | 5.4E-06 | 3.5E-05 |
| 2890239 | MGAT4B   | 7.49  | 7.38  | 0.25 | 0.24 | 5.6E-03 | 6.3E-03 |
| 3773703 | C17orf56 | 7.56  | 7.44  | 0.18 | 0.17 | 2.2E-04 | 5.6E-04 |
| 2551189 | SIX2     | 7.76  | 7.64  | 0.26 | 0.27 | 5.7E-03 | 6.4E-03 |
| 3767053 | LOC44045 | 6.89  | 6.78  | 0.21 | 0.20 | 9.4E-04 | 1.7E-03 |
| 2408146 | MYCL1    | 6.78  | 6.67  | 0.24 | 0.22 | 3.0E-03 | 3.9E-03 |
| 3844132 | FLJ45850 | 6.77  | 6.66  | 0.23 | 0.21 | 1.8E-03 | 2.7E-03 |
| 2374414 | GPR25    | 7.18  | 7.06  | 0.22 | 0.18 | 8.0E-04 | 1.5E-03 |
| 3063727 | TAF6     | 7.95  | 7.83  | 0.21 | 0.29 | 5.5E-03 | 6.2E-03 |
| 3742460 | CAMTA2   | 8.18  | 8.06  | 0.15 | 0.17 | 1.6E-05 | 7.7E-05 |
| 3221916 | AKNA     | 8.68  | 8.56  | 0.24 | 0.18 | 2.0E-03 | 2.9E-03 |
| 3704513 | GALNS    | 7.32  | 7.21  | 0.25 | 0.24 | 8.0E-03 | 8.2E-03 |
| 3643431 | CHTF18   | 7.63  | 7.52  | 0.19 | 0.16 | 5.2E-04 | 1.1E-03 |
| 3836135 | BLOC1S3  | 7.66  | 7.55  | 0.19 | 0.20 | 1.0E-03 | 1.8E-03 |
| 2408437 | CITED4   | 6.63  | 6.51  | 0.24 | 0.23 | 2.7E-03 | 3.7E-03 |
| 2899171 | HIST1H1E | 12.57 | 12.46 | 0.19 | 0.19 | 5.1E-04 | 1.1E-03 |
| 3030585 | LOC15506 | 6.59  | 6.48  | 0.18 | 0.16 | 2.5E-04 | 6.2E-04 |
| 3525538 | FLJ12118 | 8.09  | 7.98  | 0.24 | 0.24 | 4.6E-03 | 5.4E-03 |
| 3473378 | HRK      | 8.03  | 7.91  | 0.19 | 0.19 | 2.8E-04 | 6.8E-04 |
| 3644309 | SYNGR3   | 7.50  | 7.39  | 0.29 | 0.25 | 8.5E-03 | 8.6E-03 |
| 3376054 | HNRPUL2  | 7.68  | 7.56  | 0.23 | 0.22 | 4.5E-03 | 5.3E-03 |
| 3642747 | PDIA2    | 6.53  | 6.42  | 0.24 | 0.28 | 9.5E-03 | 9.3E-03 |
| 3818142 | NRTN     | 6.84  | 6.73  | 0.24 | 0.22 | 1.5E-03 | 2.3E-03 |
| 2901043 | LOC55422 | 6.63  | 6.52  | 0.23 | 0.26 | 2.6E-03 | 3.4E-03 |
| 3870895 | CDC42EP5 | 7.17  | 7.06  | 0.26 | 0.23 | 7.5E-04 | 1.4E-03 |
| 3633109 | ULK3     | 7.55  | 7.44  | 0.23 | 0.20 | 3.9E-03 | 4.7E-03 |
| 3832918 | SAMD4B   | 7.89  | 7.78  | 0.20 | 0.14 | 3.8E-04 | 8.6E-04 |
| 2727762 | SRD5A2L  | 7.14  | 7.03  | 0.29 | 0.23 | 9.4E-03 | 9.2E-03 |
| 3834651 | ZNF526   | 7.49  | 7.38  | 0.26 | 0.26 | 9.4E-03 | 9.3E-03 |
| 3235235 | LOC43995 | 7.17  | 7.06  | 0.24 | 0.23 | 5.3E-03 | 6.0E-03 |
| 2651916 | PRKCI    | 9.16  | 9.05  | 0.22 | 0.20 | 5.1E-03 | 5.9E-03 |

AJHG, Volume 82

|         |          |       |      |      |      |         |         |
|---------|----------|-------|------|------|------|---------|---------|
| 2675171 | HYAL2    | 7.43  | 7.32 | 0.22 | 0.26 | 5.7E-03 | 6.3E-03 |
| 2845351 | LOC25845 | 6.88  | 6.76 | 0.25 | 0.27 | 9.3E-03 | 9.2E-03 |
| 3716113 | TP53I13  | 7.09  | 6.97 | 0.23 | 0.21 | 2.5E-03 | 3.4E-03 |
| 3836317 | VASP     | 8.67  | 8.56 | 0.22 | 0.24 | 5.1E-03 | 5.8E-03 |
| 3966057 | CPT1B    | 8.28  | 8.17 | 0.22 | 0.22 | 3.1E-03 | 4.0E-03 |
| 3316057 | DRD4     | 6.79  | 6.68 | 0.22 | 0.23 | 1.1E-03 | 1.8E-03 |
| 2711957 | LOC65411 | 7.47  | 7.36 | 0.23 | 0.18 | 6.5E-04 | 1.2E-03 |
| 3506093 | FLJ25477 | 6.62  | 6.51 | 0.21 | 0.19 | 4.3E-04 | 9.2E-04 |
| 3807261 | SMAD7    | 7.39  | 7.28 | 0.24 | 0.20 | 3.1E-03 | 4.0E-03 |
| 7385552 | CARKL    | 6.76  | 6.65 | 0.26 | 0.25 | 7.3E-03 | 7.6E-03 |
| 3376023 | LOC51035 | 7.78  | 7.67 | 0.23 | 0.24 | 3.2E-03 | 4.1E-03 |
| 3725779 | MYST2    | 8.59  | 8.48 | 0.25 | 0.29 | 8.7E-03 | 8.7E-03 |
| 3844486 | MIER2    | 7.53  | 7.42 | 0.21 | 0.23 | 4.8E-03 | 5.6E-03 |
| 3643503 | SOX8     | 6.52  | 6.41 | 0.25 | 0.22 | 1.5E-03 | 2.3E-03 |
| 3945040 | GALR3    | 7.22  | 7.11 | 0.22 | 0.21 | 5.2E-04 | 1.1E-03 |
| 2624291 | PRKCD    | 10.09 | 9.98 | 0.22 | 0.24 | 2.3E-03 | 3.2E-03 |
| 3335719 | CCDC85B  | 7.86  | 7.75 | 0.23 | 0.28 | 6.3E-03 | 6.8E-03 |
| 3866435 | BBC3     | 6.93  | 6.81 | 0.19 | 0.20 | 8.7E-05 | 2.8E-04 |
| 2891768 | FOXC1    | 7.40  | 7.29 | 0.26 | 0.26 | 8.5E-03 | 8.5E-03 |
| 3944758 | CDC42EP1 | 6.41  | 6.30 | 0.25 | 0.25 | 5.2E-03 | 5.9E-03 |
| 3231121 | C9orf112 | 7.21  | 7.10 | 0.20 | 0.20 | 5.1E-04 | 1.1E-03 |
| 3942648 | TUG1     | 9.93  | 9.82 | 0.22 | 0.23 | 3.8E-03 | 4.6E-03 |
| 3119792 | MAPK15   | 6.63  | 6.52 | 0.19 | 0.16 | 6.8E-05 | 2.3E-04 |
| 3852691 | DDX39    | 8.93  | 8.82 | 0.23 | 0.25 | 5.8E-03 | 6.4E-03 |
| 3944778 | GGA1     | 7.82  | 7.71 | 0.21 | 0.19 | 1.5E-03 | 2.4E-03 |
| 3427014 | SNRPF    | 8.51  | 8.40 | 0.26 | 0.29 | 9.3E-03 | 9.2E-03 |
| 2599647 | FEV      | 6.88  | 6.77 | 0.24 | 0.23 | 5.3E-03 | 6.0E-03 |
| 3453774 | LMBR1L   | 7.07  | 6.96 | 0.23 | 0.21 | 3.2E-03 | 4.1E-03 |
| 3120682 | MFSD3    | 7.59  | 7.48 | 0.24 | 0.23 | 9.4E-03 | 9.2E-03 |
| 3272795 | PAOX     | 7.67  | 7.56 | 0.19 | 0.21 | 2.4E-03 | 3.3E-03 |
| 3620054 | RPAP1    | 7.48  | 7.37 | 0.22 | 0.21 | 3.6E-03 | 4.4E-03 |
| 3899346 | SNX5     | 8.23  | 8.12 | 0.25 | 0.26 | 8.7E-03 | 8.7E-03 |
| 3957207 | LOC65296 | 6.76  | 6.65 | 0.22 | 0.18 | 6.6E-04 | 1.3E-03 |

## AJHG, Volume 82

|         |          |       |       |      |      |         |         |
|---------|----------|-------|-------|------|------|---------|---------|
| 2489385 | TLX2     | 7.12  | 7.02  | 0.25 | 0.22 | 3.3E-03 | 4.2E-03 |
| 3787675 | LOC64787 | 6.51  | 6.40  | 0.21 | 0.20 | 3.6E-03 | 4.5E-03 |
| 2955118 | RP11-444 | 7.43  | 7.32  | 0.17 | 0.26 | 4.2E-03 | 5.1E-03 |
| 3946889 | ACO2     | 10.22 | 10.11 | 0.23 | 0.19 | 4.9E-03 | 5.7E-03 |
| 3418513 | 9-Mar    | 7.51  | 7.40  | 0.26 | 0.27 | 9.6E-03 | 9.4E-03 |
| 2332767 | C1orf50  | 7.10  | 6.99  | 0.25 | 0.29 | 5.5E-03 | 6.2E-03 |
| 3261820 | TRIM8    | 8.64  | 8.54  | 0.27 | 0.25 | 1.0E-02 | 9.9E-03 |
| 2361697 | C1orf66  | 6.93  | 6.82  | 0.17 | 0.20 | 8.3E-04 | 1.5E-03 |
| 3863606 | LIPE     | 6.86  | 6.75  | 0.21 | 0.19 | 2.1E-03 | 3.0E-03 |
| 2383915 | GJA12    | 7.62  | 7.52  | 0.23 | 0.23 | 2.1E-03 | 3.0E-03 |
| 3960246 | LOC12913 | 7.66  | 7.55  | 0.18 | 0.16 | 3.9E-04 | 8.7E-04 |
| 2391150 | TNFRSF18 | 6.90  | 6.79  | 0.22 | 0.17 | 3.4E-03 | 4.3E-03 |
| 3756046 | NR1D1    | 7.10  | 7.00  | 0.23 | 0.23 | 3.4E-03 | 4.3E-03 |
| 2320657 | TNFRSF8  | 7.91  | 7.80  | 0.25 | 0.20 | 3.4E-03 | 4.3E-03 |
| 3120358 | LOC64226 | 7.89  | 7.78  | 0.22 | 0.25 | 6.0E-03 | 6.5E-03 |
| 3903089 | APBA2BP  | 7.21  | 7.10  | 0.21 | 0.19 | 2.3E-03 | 3.2E-03 |
| 3337196 | NDUFV1   | 10.14 | 10.03 | 0.20 | 0.22 | 9.1E-03 | 9.0E-03 |
| 3696035 | LCAT     | 6.74  | 6.63  | 0.22 | 0.21 | 8.0E-04 | 1.5E-03 |
| 3336043 | LOC64976 | 7.94  | 7.84  | 0.17 | 0.20 | 1.1E-03 | 1.9E-03 |
| 3094157 | ZNF703   | 7.24  | 7.13  | 0.23 | 0.20 | 2.4E-03 | 3.3E-03 |
| 2756673 | GAK      | 8.40  | 8.29  | 0.18 | 0.16 | 1.0E-03 | 1.8E-03 |
| 3891048 | LOC65414 | 7.12  | 7.02  | 0.22 | 0.22 | 2.5E-03 | 3.4E-03 |
| 3048373 | LOC64644 | 7.12  | 7.01  | 0.17 | 0.17 | 1.8E-04 | 4.7E-04 |
| 3261544 | GBF1     | 9.72  | 9.61  | 0.18 | 0.20 | 1.5E-03 | 2.3E-03 |
| 2888385 | KIAA1893 | 7.35  | 7.24  | 0.21 | 0.19 | 2.0E-03 | 2.9E-03 |
| 3836266 | FOSB     | 7.25  | 7.15  | 0.24 | 0.24 | 7.6E-03 | 7.9E-03 |
| 2985964 | WDR27    | 6.41  | 6.31  | 0.24 | 0.25 | 7.2E-03 | 7.6E-03 |
| 3867928 | NOSIP    | 7.63  | 7.52  | 0.22 | 0.20 | 1.7E-03 | 2.6E-03 |
| 3842278 | ZNF524   | 6.89  | 6.79  | 0.25 | 0.28 | 7.8E-03 | 8.1E-03 |
| 3194635 | C9orf86  | 7.24  | 7.14  | 0.24 | 0.22 | 9.7E-03 | 9.5E-03 |
| 3194832 | MAMDC4   | 7.30  | 7.19  | 0.17 | 0.17 | 2.4E-04 | 6.0E-04 |
| 2493746 | LOC65305 | 6.61  | 6.51  | 0.22 | 0.23 | 3.3E-03 | 4.2E-03 |
| 3675266 | LOC33912 | 7.89  | 7.79  | 0.21 | 0.24 | 6.0E-03 | 6.6E-03 |

## AJHG, Volume 82

|         |          |       |       |      |      |         |         |
|---------|----------|-------|-------|------|------|---------|---------|
| 3738007 | FSCN2    | 6.38  | 6.28  | 0.25 | 0.21 | 6.4E-03 | 6.9E-03 |
| 3633221 | COX5A    | 10.63 | 10.52 | 0.20 | 0.21 | 3.9E-03 | 4.8E-03 |
| 3226661 | ZYG11BL  | 7.61  | 7.50  | 0.20 | 0.23 | 4.8E-03 | 5.6E-03 |
| 3850406 | EDG8     | 7.77  | 7.66  | 0.25 | 0.22 | 9.3E-03 | 9.2E-03 |
| 3078520 | ZNF746   | 8.11  | 8.01  | 0.18 | 0.18 | 4.8E-04 | 1.0E-03 |
| 3758845 | HDAC5    | 7.74  | 7.64  | 0.20 | 0.21 | 4.4E-03 | 5.2E-03 |
| 3226027 | TOR2A    | 6.59  | 6.49  | 0.19 | 0.20 | 2.4E-03 | 3.3E-03 |
| 3841260 | CNOT3    | 8.27  | 8.17  | 0.24 | 0.21 | 2.3E-03 | 3.2E-03 |
| 2877861 | SLC23A1  | 6.72  | 6.62  | 0.21 | 0.23 | 2.9E-03 | 3.9E-03 |
| 2890292 | LOC51149 | 6.84  | 6.74  | 0.18 | 0.19 | 1.2E-03 | 1.9E-03 |
| 2410111 | MUTYH    | 7.12  | 7.01  | 0.17 | 0.22 | 1.8E-03 | 2.7E-03 |
| 3335267 | SCYL1    | 8.84  | 8.74  | 0.16 | 0.16 | 1.9E-04 | 5.1E-04 |
| 3334884 | TM7SF2   | 8.06  | 7.96  | 0.25 | 0.22 | 8.7E-03 | 8.7E-03 |
| 2986906 | C7orf20  | 7.88  | 7.78  | 0.22 | 0.25 | 7.9E-03 | 8.1E-03 |
| 3645452 | KREMEN2  | 7.11  | 7.01  | 0.22 | 0.18 | 4.1E-03 | 5.0E-03 |
| 3167553 | IL11RA   | 6.57  | 6.47  | 0.21 | 0.16 | 1.5E-03 | 2.3E-03 |
| 3883013 | LOC65367 | 6.95  | 6.84  | 0.19 | 0.25 | 6.5E-03 | 7.0E-03 |
| 3334812 | SAC3D1   | 7.57  | 7.47  | 0.20 | 0.22 | 1.1E-03 | 1.8E-03 |
| 3335643 | MUS81    | 8.35  | 8.25  | 0.21 | 0.18 | 2.6E-03 | 3.5E-03 |
| 3065007 | ALKBH4   | 6.62  | 6.52  | 0.20 | 0.24 | 3.6E-03 | 4.5E-03 |
| 3924372 | COL6A1   | 7.00  | 6.90  | 0.27 | 0.28 | 9.9E-03 | 9.6E-03 |
| 2878368 | APBB3    | 7.88  | 7.78  | 0.21 | 0.21 | 3.1E-03 | 4.0E-03 |
| 2987578 | IQCE     | 6.93  | 6.83  | 0.19 | 0.16 | 8.5E-04 | 1.5E-03 |
| 3042001 | CYCS     | 7.70  | 7.59  | 0.19 | 0.20 | 9.8E-04 | 1.7E-03 |
| 3413852 | PRPH     | 6.41  | 6.31  | 0.25 | 0.20 | 6.0E-03 | 6.6E-03 |
| 3985644 | TCEAL3   | 7.30  | 7.20  | 0.27 | 0.26 | 5.7E-03 | 6.4E-03 |
| 3260957 | LZTS2    | 7.13  | 7.03  | 0.22 | 0.19 | 3.0E-03 | 3.9E-03 |
| 3896594 | C20orf75 | 6.31  | 6.21  | 0.20 | 0.20 | 8.5E-04 | 1.5E-03 |
| 3873142 | SOX12    | 6.73  | 6.63  | 0.23 | 0.24 | 2.9E-03 | 3.9E-03 |
| 3862128 | DYRK1B   | 7.01  | 6.90  | 0.17 | 0.21 | 2.1E-03 | 3.0E-03 |
| 3819263 | LOC64578 | 7.41  | 7.31  | 0.17 | 0.15 | 2.8E-05 | 1.2E-04 |
| 3845081 | C19orf26 | 7.09  | 6.99  | 0.24 | 0.26 | 4.2E-03 | 5.0E-03 |
| 2503021 | PTPN4    | 7.08  | 6.98  | 0.26 | 0.28 | 5.0E-03 | 5.7E-03 |

## AJHG, Volume 82

|         |          |      |      |      |      |         |         |
|---------|----------|------|------|------|------|---------|---------|
| 3126739 | LZTS1    | 6.41 | 6.31 | 0.18 | 0.24 | 3.5E-03 | 4.3E-03 |
| 3822216 | IER2     | 8.41 | 8.31 | 0.24 | 0.25 | 1.0E-02 | 9.7E-03 |
| 2330289 | RPRC1    | 8.54 | 8.44 | 0.22 | 0.24 | 8.7E-03 | 8.8E-03 |
| 3837759 | GRIN2D   | 6.48 | 6.38 | 0.20 | 0.19 | 1.3E-03 | 2.0E-03 |
| 3909064 | UBE2V1   | 7.69 | 7.59 | 0.21 | 0.21 | 3.3E-03 | 4.2E-03 |
| 3864597 | FLJ12886 | 7.79 | 7.69 | 0.23 | 0.23 | 7.0E-03 | 7.4E-03 |
| 3770305 | CD300C   | 6.48 | 6.38 | 0.24 | 0.22 | 9.5E-03 | 9.3E-03 |
| 3708704 | POLR2A   | 9.24 | 9.14 | 0.19 | 0.19 | 1.3E-03 | 2.1E-03 |
| 3735478 | SPHK1    | 6.62 | 6.52 | 0.19 | 0.20 | 5.6E-04 | 1.1E-03 |
| 2467855 | SOX11    | 6.59 | 6.48 | 0.23 | 0.19 | 3.7E-03 | 4.5E-03 |
| 2528198 | CDK5R2   | 6.55 | 6.45 | 0.20 | 0.22 | 1.7E-03 | 2.6E-03 |
| 3814927 | MADCAM1  | 7.06 | 6.96 | 0.21 | 0.23 | 6.7E-03 | 7.1E-03 |
| 2350741 | ATXN7L2  | 6.67 | 6.57 | 0.15 | 0.22 | 1.8E-03 | 2.6E-03 |
| 3675815 | MGC24381 | 8.38 | 8.28 | 0.20 | 0.22 | 2.5E-03 | 3.4E-03 |
| 3879112 | INSM1    | 6.86 | 6.76 | 0.22 | 0.21 | 2.7E-03 | 3.6E-03 |
| 3942998 | SFI1     | 7.18 | 7.08 | 0.16 | 0.14 | 2.2E-05 | 9.9E-05 |
| 3759077 | CGI-69   | 9.64 | 9.54 | 0.21 | 0.22 | 1.0E-02 | 9.6E-03 |
| 2812690 | LOC37544 | 7.15 | 7.05 | 0.19 | 0.21 | 1.8E-03 | 2.6E-03 |
| 2889486 | MGC15875 | 7.96 | 7.86 | 0.19 | 0.26 | 9.5E-03 | 9.3E-03 |
| 3815210 | AZU1     | 6.71 | 6.62 | 0.21 | 0.22 | 1.6E-03 | 2.4E-03 |
| 3707258 | MINK1    | 8.09 | 7.99 | 0.15 | 0.18 | 3.6E-04 | 8.2E-04 |
| 3333226 | LOC64593 | 7.73 | 7.63 | 0.21 | 0.27 | 1.0E-02 | 9.9E-03 |
| 3852034 | TRMT1    | 7.27 | 7.17 | 0.22 | 0.23 | 6.8E-03 | 7.3E-03 |
| 2606026 | LOC64235 | 6.95 | 6.86 | 0.12 | 0.15 | 2.6E-05 | 1.1E-04 |
| 3945084 | MICAL-L1 | 6.84 | 6.74 | 0.22 | 0.19 | 9.3E-03 | 9.2E-03 |
| 3119708 | TIGD5    | 7.09 | 6.99 | 0.24 | 0.18 | 4.6E-03 | 5.4E-03 |
| 3155937 | LOC64416 | 7.74 | 7.64 | 0.21 | 0.19 | 2.1E-03 | 3.0E-03 |
| 2324097 | PINK1    | 6.60 | 6.50 | 0.21 | 0.20 | 3.9E-03 | 4.7E-03 |
| 3838947 | MED25    | 7.38 | 7.28 | 0.20 | 0.21 | 5.4E-03 | 6.1E-03 |
| 3845315 | MBD3     | 7.34 | 7.24 | 0.14 | 0.19 | 4.7E-04 | 1.0E-03 |
| 2333195 | KIAA0467 | 7.83 | 7.73 | 0.19 | 0.16 | 2.8E-04 | 6.9E-04 |
| 3554868 | C14orf80 | 7.31 | 7.21 | 0.20 | 0.18 | 1.2E-03 | 2.0E-03 |
| 3381540 | LOC65198 | 7.83 | 7.73 | 0.18 | 0.18 | 1.2E-03 | 2.0E-03 |



## AJHG, Volume 82

|         |          |      |      |      |      |         |         |
|---------|----------|------|------|------|------|---------|---------|
| 3825838 | FLJ44968 | 6.47 | 6.38 | 0.20 | 0.20 | 8.0E-04 | 1.5E-03 |
| 3334633 | SLC22A11 | 6.59 | 6.49 | 0.16 | 0.22 | 7.4E-04 | 1.4E-03 |
| 3844175 | ZNF446   | 6.68 | 6.58 | 0.18 | 0.15 | 6.5E-04 | 1.2E-03 |
| 3315835 | PTDSS2   | 7.83 | 7.73 | 0.21 | 0.22 | 7.6E-03 | 7.9E-03 |
| 2641667 | IFT122   | 6.72 | 6.62 | 0.20 | 0.22 | 3.8E-03 | 4.7E-03 |
| 3697005 | EXOSC6   | 8.34 | 8.24 | 0.18 | 0.18 | 1.0E-03 | 1.8E-03 |
| 3676557 | CASKIN1  | 6.50 | 6.40 | 0.18 | 0.17 | 2.1E-04 | 5.4E-04 |
| 3438527 | ULK1     | 7.70 | 7.61 | 0.16 | 0.14 | 1.5E-04 | 4.1E-04 |
| 3764289 | BZRAP1   | 6.36 | 6.26 | 0.15 | 0.16 | 5.6E-04 | 1.1E-03 |
| 3893287 | ARFGAP1  | 8.01 | 7.92 | 0.18 | 0.18 | 2.1E-03 | 3.0E-03 |
| 3830712 | MLL4     | 7.59 | 7.49 | 0.12 | 0.14 | 2.7E-05 | 1.2E-04 |
| 3266934 | NANOS1   | 7.17 | 7.07 | 0.20 | 0.18 | 4.3E-04 | 9.2E-04 |
| 3677662 | NOD3     | 6.96 | 6.86 | 0.18 | 0.18 | 9.0E-03 | 8.9E-03 |
| 3725685 | NGFR     | 6.38 | 6.29 | 0.22 | 0.20 | 5.8E-03 | 6.4E-03 |
| 3661559 | IRX5     | 6.40 | 6.30 | 0.22 | 0.24 | 4.4E-03 | 5.2E-03 |
| 3458177 | SDR-O    | 6.37 | 6.27 | 0.21 | 0.21 | 2.8E-03 | 3.7E-03 |
| 3620741 | CDAN1    | 6.84 | 6.75 | 0.19 | 0.19 | 5.0E-03 | 5.7E-03 |
| 3829398 | CHST8    | 6.41 | 6.31 | 0.20 | 0.21 | 1.4E-03 | 2.2E-03 |
| 3676165 | HAGH     | 7.06 | 6.97 | 0.21 | 0.22 | 5.3E-03 | 6.0E-03 |
| 3704939 | C16orf7  | 6.66 | 6.56 | 0.17 | 0.14 | 2.9E-04 | 7.0E-04 |
| 3816424 | SPPL2B   | 8.27 | 8.17 | 0.17 | 0.21 | 5.2E-03 | 5.9E-03 |
| 3624804 | ONECUT1  | 7.04 | 6.95 | 0.24 | 0.21 | 8.4E-03 | 8.5E-03 |
| 3713278 | FLJ35934 | 7.35 | 7.25 | 0.19 | 0.18 | 1.6E-03 | 2.4E-03 |
| 3871730 | LOC12620 | 7.80 | 7.71 | 0.21 | 0.19 | 2.9E-03 | 3.8E-03 |
| 3035223 | MICAL-L2 | 6.28 | 6.18 | 0.16 | 0.16 | 4.2E-05 | 1.6E-04 |
| 3120613 | PPP1R16A | 7.20 | 7.10 | 0.18 | 0.15 | 1.4E-03 | 2.2E-03 |
| 3644375 | TSC2     | 7.74 | 7.65 | 0.16 | 0.18 | 5.4E-04 | 1.1E-03 |
| 3380901 | NUMA1    | 8.89 | 8.80 | 0.20 | 0.22 | 8.3E-03 | 8.5E-03 |
| 3317024 | SYT8     | 6.97 | 6.88 | 0.17 | 0.18 | 1.2E-03 | 1.9E-03 |
| 3868828 | KLK10    | 6.53 | 6.44 | 0.19 | 0.22 | 1.0E-02 | 9.7E-03 |
| 3359432 | CDKN1C   | 6.73 | 6.63 | 0.27 | 0.24 | 5.6E-03 | 6.3E-03 |
| 3596894 | NLF1     | 6.64 | 6.55 | 0.20 | 0.24 | 4.4E-03 | 5.2E-03 |
| 3652489 | POLR3E   | 8.14 | 8.05 | 0.18 | 0.19 | 2.4E-03 | 3.3E-03 |

## AJHG, Volume 82

|         |          |      |      |      |      |         |         |
|---------|----------|------|------|------|------|---------|---------|
| 3676328 | NOXO1    | 6.36 | 6.27 | 0.18 | 0.16 | 3.8E-04 | 8.6E-04 |
| 3005956 | FLJ10099 | 8.95 | 8.85 | 0.22 | 0.20 | 9.7E-03 | 9.4E-03 |
| 2394361 | NPHP4    | 6.73 | 6.63 | 0.12 | 0.11 | 2.4E-06 | 2.0E-05 |
| 3913220 | C20orf15 | 6.57 | 6.48 | 0.19 | 0.18 | 2.4E-03 | 3.3E-03 |
| 3372235 | RAPSN    | 6.66 | 6.57 | 0.23 | 0.22 | 3.8E-03 | 4.7E-03 |
| 2459837 | ACTA1    | 7.06 | 6.96 | 0.21 | 0.21 | 5.6E-03 | 6.3E-03 |
| 3759587 | PLCD3    | 6.87 | 6.78 | 0.15 | 0.14 | 1.1E-04 | 3.4E-04 |
| 2474161 | FLJ21839 | 7.34 | 7.25 | 0.22 | 0.22 | 8.1E-03 | 8.3E-03 |
| 4035762 | TTY3     | 7.24 | 7.15 | 0.24 | 0.26 | 9.6E-03 | 9.4E-03 |
| 3888383 | SLC9A8   | 7.26 | 7.16 | 0.20 | 0.21 | 5.1E-03 | 5.8E-03 |
| 3031880 | CENTG3   | 7.37 | 7.27 | 0.15 | 0.14 | 1.1E-04 | 3.3E-04 |
| 3103745 | CRISPLD1 | 7.21 | 7.12 | 0.19 | 0.22 | 4.6E-03 | 5.4E-03 |
| 2623859 | NISCH    | 8.06 | 7.96 | 0.14 | 0.16 | 4.2E-04 | 9.1E-04 |
| 3815233 | ELA2     | 6.70 | 6.61 | 0.21 | 0.20 | 1.7E-03 | 2.6E-03 |
| 3409364 | KLHDC5   | 7.55 | 7.45 | 0.22 | 0.19 | 4.1E-03 | 4.9E-03 |
| 3119516 | ZNF696   | 6.49 | 6.39 | 0.24 | 0.19 | 6.3E-03 | 6.8E-03 |
| 3844952 | POLR2E   | 9.13 | 9.03 | 0.20 | 0.21 | 8.6E-03 | 8.6E-03 |
| 3715809 | NEK8     | 6.90 | 6.80 | 0.16 | 0.18 | 2.0E-03 | 2.9E-03 |
| 3394315 | C1QTNF5  | 7.44 | 7.34 | 0.20 | 0.23 | 6.9E-03 | 7.4E-03 |
| 3726325 | XYLT2    | 7.06 | 6.96 | 0.19 | 0.17 | 1.8E-03 | 2.7E-03 |
| 3772581 | USP36    | 7.80 | 7.71 | 0.19 | 0.22 | 9.4E-03 | 9.2E-03 |
| 3837372 | GLTSCR1  | 6.89 | 6.80 | 0.13 | 0.16 | 7.7E-06 | 4.5E-05 |
| 3458400 | NDUFA4L2 | 6.73 | 6.64 | 0.23 | 0.21 | 7.4E-03 | 7.7E-03 |
| 3722806 | ASB16    | 6.87 | 6.78 | 0.22 | 0.20 | 5.7E-03 | 6.3E-03 |
| 3598381 | LOC65250 | 7.74 | 7.64 | 0.24 | 0.20 | 8.7E-03 | 8.7E-03 |
| 3771160 | FBF1     | 6.68 | 6.59 | 0.16 | 0.16 | 5.0E-04 | 1.0E-03 |
| 3667241 | FUK      | 7.18 | 7.09 | 0.18 | 0.17 | 1.2E-03 | 1.9E-03 |
| 3071700 | IMPDH1   | 7.40 | 7.31 | 0.19 | 0.18 | 4.6E-03 | 5.4E-03 |
| 3030799 | KIAA1862 | 7.17 | 7.08 | 0.15 | 0.17 | 5.8E-04 | 1.1E-03 |
| 3736666 | FLJ21865 | 7.10 | 7.01 | 0.18 | 0.17 | 2.0E-03 | 2.9E-03 |
| 3677218 | PRSS33   | 6.88 | 6.79 | 0.22 | 0.24 | 7.7E-03 | 7.9E-03 |
| 2348962 | GPR88    | 6.34 | 6.25 | 0.23 | 0.24 | 8.9E-03 | 8.9E-03 |
| 3846214 | DOHH     | 6.96 | 6.87 | 0.19 | 0.20 | 8.1E-03 | 8.3E-03 |

## AJHG, Volume 82

|         |          |      |      |      |      |         |         |
|---------|----------|------|------|------|------|---------|---------|
| 3842379 | EPN1     | 8.16 | 8.07 | 0.19 | 0.16 | 2.7E-03 | 3.6E-03 |
| 3937130 | C22orf25 | 7.79 | 7.70 | 0.18 | 0.19 | 4.1E-03 | 5.0E-03 |
| 3293312 | NPFFR1   | 6.38 | 6.29 | 0.23 | 0.19 | 8.3E-03 | 8.4E-03 |
| 3642993 | FLJ36208 | 6.88 | 6.79 | 0.19 | 0.21 | 2.9E-03 | 3.8E-03 |
| 2693937 | GPR175   | 8.03 | 7.94 | 0.22 | 0.19 | 7.1E-03 | 7.5E-03 |
| 3834778 | MEGF8    | 7.03 | 6.94 | 0.12 | 0.12 | 1.6E-05 | 7.9E-05 |
| 3377044 | SF1      | 9.66 | 9.57 | 0.20 | 0.19 | 5.1E-03 | 5.8E-03 |
| 3817256 | PIAS4    | 7.94 | 7.85 | 0.17 | 0.19 | 3.0E-03 | 3.9E-03 |
| 2322957 | ARHGEF10 | 6.49 | 6.40 | 0.16 | 0.14 | 3.2E-04 | 7.4E-04 |
| 3838757 | SR-A1    | 7.43 | 7.34 | 0.16 | 0.15 | 2.7E-04 | 6.6E-04 |
| 3848907 | ANKRD47  | 6.51 | 6.43 | 0.20 | 0.19 | 2.9E-03 | 3.8E-03 |
| 2673830 | DALRD3   | 7.70 | 7.62 | 0.18 | 0.20 | 4.9E-03 | 5.7E-03 |
| 3982293 | MAGEE1   | 6.34 | 6.26 | 0.23 | 0.20 | 9.8E-03 | 9.5E-03 |
| 3275690 | IL15RA   | 7.95 | 7.86 | 0.19 | 0.18 | 7.4E-03 | 7.8E-03 |
| 3476796 | LOC65340 | 8.13 | 8.04 | 0.17 | 0.19 | 6.5E-03 | 7.0E-03 |
| 3851630 | FBXW9    | 6.52 | 6.43 | 0.18 | 0.18 | 2.5E-03 | 3.4E-03 |
| 2487882 | VAX2     | 6.66 | 6.58 | 0.21 | 0.22 | 6.0E-03 | 6.6E-03 |
| 3830825 | LOC14813 | 7.15 | 7.06 | 0.19 | 0.18 | 2.3E-03 | 3.2E-03 |
| 3907711 | CDH22    | 6.59 | 6.50 | 0.17 | 0.16 | 1.8E-03 | 2.7E-03 |
| 3820921 | SMARCA4  | 8.76 | 8.67 | 0.19 | 0.18 | 3.7E-03 | 4.5E-03 |
| 3760552 | RPRML    | 7.48 | 7.40 | 0.21 | 0.23 | 8.4E-03 | 8.5E-03 |
| 2843209 | PRR7     | 7.74 | 7.65 | 0.21 | 0.18 | 4.1E-03 | 5.0E-03 |
| 3866231 | STRN4    | 7.78 | 7.69 | 0.16 | 0.20 | 5.2E-03 | 5.9E-03 |
| 3188478 | CRB2     | 6.91 | 6.82 | 0.20 | 0.17 | 3.2E-03 | 4.1E-03 |
| 3924144 | COL18A1  | 7.05 | 6.97 | 0.17 | 0.17 | 1.2E-03 | 2.0E-03 |
| 3870883 | LENG9    | 6.37 | 6.28 | 0.18 | 0.17 | 1.4E-03 | 2.2E-03 |
| 3089140 | RAI16    | 7.32 | 7.24 | 0.17 | 0.17 | 3.5E-03 | 4.3E-03 |
| 2738949 | LOC65098 | 8.26 | 8.17 | 0.20 | 0.22 | 1.0E-02 | 9.7E-03 |
| 2402601 | FLJ38020 | 6.51 | 6.43 | 0.17 | 0.19 | 4.7E-03 | 5.5E-03 |
| 3685261 | GGA2     | 7.15 | 7.07 | 0.15 | 0.17 | 1.7E-03 | 2.6E-03 |
| 2716810 | EVC      | 8.57 | 8.48 | 0.17 | 0.18 | 2.4E-03 | 3.3E-03 |
| 3671651 | LOC16193 | 6.83 | 6.75 | 0.18 | 0.19 | 2.9E-03 | 3.8E-03 |
| 3675840 | UNKL     | 7.01 | 6.92 | 0.18 | 0.16 | 2.1E-03 | 3.0E-03 |

## AJHG, Volume 82

|         |          |      |      |      |      |         |         |
|---------|----------|------|------|------|------|---------|---------|
| 3743611 | KIAA1787 | 7.06 | 6.98 | 0.13 | 0.15 | 2.7E-04 | 6.7E-04 |
| 3836217 | KLC3     | 6.41 | 6.33 | 0.19 | 0.18 | 3.4E-03 | 4.3E-03 |
| 2497812 | POU3F3   | 7.30 | 7.21 | 0.18 | 0.22 | 7.3E-03 | 7.7E-03 |
| 2953777 | FRS3     | 6.44 | 6.35 | 0.19 | 0.17 | 4.4E-03 | 5.2E-03 |
| 3854621 | INSL3    | 6.61 | 6.52 | 0.22 | 0.21 | 2.3E-03 | 3.2E-03 |
| 2391005 | C1orf159 | 6.80 | 6.71 | 0.16 | 0.16 | 1.5E-03 | 2.3E-03 |
| 2316953 | PRDM16   | 6.24 | 6.15 | 0.17 | 0.13 | 6.5E-04 | 1.2E-03 |
| 2798586 | PDCD6    | 8.09 | 8.01 | 0.20 | 0.16 | 5.9E-03 | 6.5E-03 |
| 3726537 | EPN3     | 6.73 | 6.64 | 0.18 | 0.20 | 8.4E-03 | 8.5E-03 |
| 3127259 | NUDT18   | 7.13 | 7.05 | 0.19 | 0.19 | 6.0E-03 | 6.6E-03 |
| 3858907 | SLC7A10  | 6.62 | 6.54 | 0.18 | 0.18 | 3.7E-03 | 4.6E-03 |
| 2406662 | C1orf78  | 7.42 | 7.34 | 0.17 | 0.17 | 1.4E-03 | 2.2E-03 |
| 3995885 | PLXNB3   | 6.56 | 6.48 | 0.14 | 0.15 | 4.2E-04 | 9.2E-04 |
| 2360773 | MTX1     | 7.81 | 7.72 | 0.19 | 0.20 | 9.0E-03 | 8.9E-03 |
| 3755976 | LOC64329 | 8.42 | 8.33 | 0.17 | 0.18 | 6.0E-03 | 6.6E-03 |
| 2621333 | PTPN23   | 7.49 | 7.41 | 0.12 | 0.13 | 1.7E-04 | 4.6E-04 |
| 2317512 | DFFB     | 6.92 | 6.84 | 0.15 | 0.15 | 1.2E-03 | 2.0E-03 |
| 2986951 | CYP2W1   | 6.56 | 6.48 | 0.22 | 0.18 | 3.8E-03 | 4.7E-03 |
| 2571608 | PAX8     | 6.48 | 6.40 | 0.17 | 0.18 | 4.7E-03 | 5.5E-03 |
| 3924424 | COL6A2   | 6.99 | 6.91 | 0.20 | 0.18 | 7.3E-03 | 7.7E-03 |
| 3893520 | TNFRSF6B | 6.84 | 6.76 | 0.14 | 0.14 | 9.2E-04 | 1.6E-03 |
| 3336857 | ANKRD13D | 7.34 | 7.26 | 0.19 | 0.17 | 5.4E-03 | 6.1E-03 |
| 3644932 | AMDHD2   | 7.54 | 7.46 | 0.18 | 0.19 | 9.1E-03 | 9.0E-03 |
| 4003155 | ARX      | 6.51 | 6.43 | 0.21 | 0.22 | 5.8E-03 | 6.4E-03 |
| 3868125 | PNKP     | 7.66 | 7.58 | 0.15 | 0.17 | 2.7E-03 | 3.6E-03 |
| 3817222 | ITGB1BP3 | 6.39 | 6.31 | 0.21 | 0.17 | 8.9E-03 | 8.9E-03 |
| 3842105 | SUV420H2 | 7.45 | 7.37 | 0.17 | 0.17 | 4.9E-03 | 5.6E-03 |
| 3762198 | COL1A1   | 6.58 | 6.50 | 0.14 | 0.14 | 3.1E-04 | 7.3E-04 |
| 3064293 | EPHB4    | 6.35 | 6.27 | 0.15 | 0.18 | 5.4E-03 | 6.1E-03 |
| 3643196 | KIAA1924 | 6.78 | 6.70 | 0.19 | 0.19 | 1.0E-02 | 9.7E-03 |
| 3360901 | TRIM3    | 6.27 | 6.20 | 0.11 | 0.13 | 3.6E-04 | 8.1E-04 |
| 3817116 | TJP3     | 6.57 | 6.49 | 0.17 | 0.16 | 5.0E-03 | 5.7E-03 |
| 2560178 | PCGF1    | 6.41 | 6.33 | 0.19 | 0.21 | 7.2E-03 | 7.6E-03 |

## AJHG, Volume 82

|         |          |       |       |      |      |         |         |
|---------|----------|-------|-------|------|------|---------|---------|
| 3695450 | LOC65331 | 6.28  | 6.21  | 0.14 | 0.15 | 1.0E-03 | 1.7E-03 |
| 3709540 | PFAS     | 8.31  | 8.24  | 0.18 | 0.17 | 8.7E-03 | 8.7E-03 |
| 3945396 | GTPBP1   | 9.10  | 9.02  | 0.17 | 0.18 | 5.6E-03 | 6.3E-03 |
| 3370869 | ALX4     | 6.67  | 6.59  | 0.23 | 0.22 | 6.1E-03 | 6.7E-03 |
| 3190893 | FAM73B   | 7.24  | 7.16  | 0.16 | 0.18 | 8.0E-03 | 8.2E-03 |
| 3738969 | FOXK2    | 9.18  | 9.10  | 0.16 | 0.13 | 1.9E-03 | 2.7E-03 |
| 3119017 | LOC65014 | 6.56  | 6.48  | 0.19 | 0.18 | 5.7E-03 | 6.3E-03 |
| 3530002 | KIAA0323 | 7.34  | 7.26  | 0.18 | 0.21 | 7.1E-03 | 7.5E-03 |
| 3406421 | STRAP    | 8.03  | 7.95  | 0.16 | 0.18 | 9.9E-03 | 9.6E-03 |
| 2694817 | PLXND1   | 6.36  | 6.29  | 0.17 | 0.14 | 2.3E-03 | 3.2E-03 |
| 3960902 | NPTXR    | 6.68  | 6.61  | 0.19 | 0.18 | 9.1E-03 | 9.0E-03 |
| 2835619 | MYOZ3    | 6.44  | 6.36  | 0.23 | 0.22 | 6.7E-03 | 7.1E-03 |
| 3553337 | TRAF3    | 8.68  | 8.61  | 0.19 | 0.21 | 7.0E-03 | 7.5E-03 |
| 4050590 | NOXA1    | 6.98  | 6.90  | 0.17 | 0.17 | 4.9E-03 | 5.7E-03 |
| 3914021 | GMEB2    | 7.54  | 7.47  | 0.18 | 0.17 | 7.8E-03 | 8.1E-03 |
| 3738138 | HGS      | 8.50  | 8.42  | 0.17 | 0.17 | 6.3E-03 | 6.8E-03 |
| 3816359 | AMH      | 6.82  | 6.75  | 0.18 | 0.18 | 5.9E-03 | 6.5E-03 |
| 4037595 | ENST0000 | 12.72 | 12.65 | 0.15 | 0.15 | 2.0E-03 | 2.9E-03 |
| 3645253 | SRRM2    | 10.17 | 10.10 | 0.15 | 0.17 | 7.9E-03 | 8.1E-03 |
| 3452865 | COL2A1   | 6.54  | 6.47  | 0.17 | 0.17 | 9.6E-03 | 9.4E-03 |
| 2474568 | KRTCAP3  | 7.07  | 7.00  | 0.16 | 0.17 | 5.0E-03 | 5.7E-03 |
| 3557350 | SLC22A17 | 6.39  | 6.32  | 0.18 | 0.17 | 9.8E-03 | 9.5E-03 |
| 3834674 | CIC      | 7.67  | 7.60  | 0.18 | 0.17 | 8.1E-03 | 8.3E-03 |
| 3738439 | LRRC45   | 6.91  | 6.84  | 0.15 | 0.17 | 1.0E-02 | 9.8E-03 |
| 2494447 | WDR39    | 8.41  | 8.34  | 0.15 | 0.15 | 3.7E-03 | 4.6E-03 |
| 2375038 | GPR37L1  | 6.48  | 6.41  | 0.19 | 0.19 | 6.1E-03 | 6.6E-03 |
| 3418214 | MBD6     | 7.13  | 7.06  | 0.16 | 0.15 | 1.1E-03 | 1.9E-03 |
| 3893338 | COL20A1  | 6.63  | 6.55  | 0.19 | 0.17 | 7.7E-03 | 7.9E-03 |
| 3675047 | AXIN1    | 7.64  | 7.57  | 0.16 | 0.15 | 6.1E-03 | 6.6E-03 |
| 2404693 | BAI2     | 6.23  | 6.16  | 0.18 | 0.13 | 2.6E-03 | 3.5E-03 |
| 3643752 | BAIAP3   | 6.28  | 6.21  | 0.15 | 0.15 | 3.0E-03 | 3.9E-03 |
| 2888674 | RAB24    | 7.21  | 7.14  | 0.15 | 0.16 | 7.4E-03 | 7.8E-03 |
| 3872817 | A1BG     | 6.44  | 6.37  | 0.17 | 0.18 | 6.7E-03 | 7.1E-03 |

## AJHG, Volume 82

|         |          |       |       |      |      |         |         |
|---------|----------|-------|-------|------|------|---------|---------|
| 2907623 | KLC4     | 7.04  | 6.97  | 0.16 | 0.16 | 6.9E-03 | 7.4E-03 |
| 3695648 | ZDHHC1   | 6.30  | 6.23  | 0.17 | 0.16 | 5.6E-03 | 6.3E-03 |
| 3662924 | KATNB1   | 7.65  | 7.58  | 0.14 | 0.16 | 8.3E-03 | 8.5E-03 |
| 3861503 | CAPN12   | 6.34  | 6.28  | 0.18 | 0.16 | 7.9E-03 | 8.1E-03 |
| 3693314 | KIFC3    | 6.58  | 6.52  | 0.16 | 0.15 | 2.5E-03 | 3.4E-03 |
| 3853108 | NOTCH3   | 6.20  | 6.14  | 0.12 | 0.12 | 7.5E-04 | 1.4E-03 |
| 3230610 | ABCA2    | 6.23  | 6.16  | 0.12 | 0.13 | 8.6E-04 | 1.5E-03 |
| 4051619 | FLJ20433 | 6.82  | 6.75  | 0.16 | 0.15 | 6.9E-03 | 7.3E-03 |
| 3913018 | LOC64595 | 6.87  | 6.81  | 0.15 | 0.14 | 7.6E-03 | 7.9E-03 |
| 2889916 | ADAMTS2  | 6.40  | 6.33  | 0.17 | 0.17 | 5.2E-03 | 6.0E-03 |
| 3188780 | GPR144   | 6.70  | 6.63  | 0.14 | 0.15 | 3.0E-03 | 3.9E-03 |
| 3179706 | LOC65021 | 6.37  | 6.31  | 0.16 | 0.15 | 7.0E-03 | 7.5E-03 |
| 3414029 | KCNH3    | 6.39  | 6.33  | 0.14 | 0.14 | 3.8E-03 | 4.7E-03 |
| 3158060 | OPLAH    | 6.73  | 6.67  | 0.16 | 0.14 | 6.2E-03 | 6.8E-03 |
| 3023149 | FLNC     | 6.24  | 6.18  | 0.14 | 0.13 | 4.5E-03 | 5.3E-03 |
| 3848745 | FBN3     | 6.25  | 6.19  | 0.14 | 0.12 | 4.5E-03 | 5.3E-03 |
| 3191805 | LAMC3    | 6.45  | 6.39  | 0.17 | 0.15 | 5.1E-03 | 5.9E-03 |
| 3815888 | APC2     | 6.55  | 6.49  | 0.16 | 0.15 | 8.8E-03 | 8.8E-03 |
| 3712978 | MYO15A   | 6.22  | 6.16  | 0.11 | 0.12 | 8.1E-03 | 8.3E-03 |
| 3309124 | C10orf46 | 7.82  | 7.90  | 0.18 | 0.16 | 1.0E-02 | 9.7E-03 |
| 3157901 | PLEC1    | 7.44  | 7.51  | 0.13 | 0.17 | 4.5E-03 | 5.3E-03 |
| 3095002 | ADAM9    | 8.77  | 8.84  | 0.19 | 0.18 | 8.4E-03 | 8.5E-03 |
| 3912137 | PPP1R3D  | 7.89  | 7.97  | 0.19 | 0.16 | 5.3E-03 | 6.0E-03 |
| 3934652 | UBE2G2   | 8.39  | 8.47  | 0.18 | 0.17 | 2.5E-03 | 3.4E-03 |
| 2696764 | MSL2L1   | 10.06 | 10.15 | 0.18 | 0.18 | 4.5E-03 | 5.3E-03 |
| 3743852 | FXR2     | 8.27  | 8.36  | 0.19 | 0.19 | 6.0E-03 | 6.6E-03 |
| 3696571 | TERF2    | 8.56  | 8.64  | 0.16 | 0.16 | 2.2E-03 | 3.1E-03 |
| 3442054 | SCARNA11 | 10.02 | 10.10 | 0.17 | 0.19 | 5.3E-03 | 6.0E-03 |
| 3773932 | ACTG1    | 11.77 | 11.86 | 0.19 | 0.16 | 2.9E-03 | 3.8E-03 |
| 3553690 | MARK3    | 8.77  | 8.86  | 0.19 | 0.19 | 4.2E-03 | 5.1E-03 |
| 3457315 | WIBG     | 7.13  | 7.22  | 0.18 | 0.22 | 9.9E-03 | 9.5E-03 |
| 3567984 | PPP2R5E  | 9.04  | 9.13  | 0.17 | 0.20 | 5.3E-03 | 6.0E-03 |
| 3030285 | CUL1     | 8.63  | 8.72  | 0.20 | 0.17 | 4.0E-03 | 4.8E-03 |

## AJHG, Volume 82

|         |          |       |       |      |      |         |         |
|---------|----------|-------|-------|------|------|---------|---------|
| 3328389 | EXT2     | 6.99  | 7.08  | 0.21 | 0.19 | 7.4E-03 | 7.7E-03 |
| 3348852 | FKSG49   | 8.98  | 9.06  | 0.21 | 0.18 | 4.5E-03 | 5.3E-03 |
| 3179551 | FGD3     | 7.30  | 7.39  | 0.20 | 0.21 | 7.2E-03 | 7.6E-03 |
| 2393740 | KIAA0562 | 7.48  | 7.57  | 0.22 | 0.24 | 9.5E-03 | 9.3E-03 |
| 3215245 | C9orf100 | 7.81  | 7.90  | 0.22 | 0.20 | 9.8E-03 | 9.5E-03 |
| 3234140 | ATP5C1   | 11.05 | 11.14 | 0.22 | 0.19 | 7.0E-03 | 7.4E-03 |
| 3474815 | C12orf43 | 7.41  | 7.50  | 0.15 | 0.18 | 2.5E-03 | 3.4E-03 |
| 3103187 | TERF1    | 7.55  | 7.64  | 0.18 | 0.19 | 1.4E-03 | 2.3E-03 |
| 3855660 | SF4      | 7.01  | 7.10  | 0.19 | 0.24 | 7.5E-03 | 7.8E-03 |
| 2738466 | SCYE1    | 8.05  | 8.14  | 0.18 | 0.22 | 7.9E-03 | 8.1E-03 |
| 3407229 | AEBP2    | 8.06  | 8.15  | 0.22 | 0.22 | 8.7E-03 | 8.7E-03 |
| 3938175 | UBE2L3   | 7.07  | 7.17  | 0.21 | 0.21 | 5.8E-03 | 6.4E-03 |
| 3730731 | WDR68    | 9.49  | 9.59  | 0.20 | 0.19 | 1.6E-03 | 2.5E-03 |
| 2902207 | HCG27    | 6.66  | 6.75  | 0.19 | 0.22 | 6.2E-03 | 6.7E-03 |
| 3704717 | LOC65310 | 8.06  | 8.16  | 0.18 | 0.18 | 2.4E-03 | 3.3E-03 |
| 3086206 | FDFT1    | 10.09 | 10.19 | 0.24 | 0.23 | 9.7E-03 | 9.5E-03 |
| 3853299 | AKAP8    | 8.16  | 8.26  | 0.17 | 0.16 | 1.6E-03 | 2.4E-03 |
| 3294854 | LOC65365 | 7.41  | 7.50  | 0.19 | 0.18 | 2.1E-03 | 3.0E-03 |
| 3478957 | DDX51    | 7.71  | 7.80  | 0.19 | 0.21 | 5.2E-03 | 6.0E-03 |
| 2830742 | JMJD1B   | 9.06  | 9.16  | 0.22 | 0.21 | 8.1E-03 | 8.3E-03 |
| 3416522 | COPZ1    | 9.79  | 9.89  | 0.22 | 0.26 | 9.3E-03 | 9.1E-03 |
| 3923312 | D21S2056 | 7.95  | 8.04  | 0.22 | 0.20 | 9.5E-03 | 9.3E-03 |
| 3832643 | ACTN4    | 10.06 | 10.16 | 0.17 | 0.20 | 1.7E-03 | 2.6E-03 |
| 3706000 | RPA1     | 9.34  | 9.43  | 0.18 | 0.15 | 4.1E-04 | 8.9E-04 |
| 2801526 | CCT5     | 10.57 | 10.67 | 0.20 | 0.21 | 4.8E-03 | 5.5E-03 |
| 3667902 | DHX38    | 7.76  | 7.86  | 0.19 | 0.20 | 2.0E-03 | 2.9E-03 |
| 3227014 | ASB6     | 6.91  | 7.01  | 0.20 | 0.24 | 8.4E-03 | 8.5E-03 |
| 3548152 | TDPI     | 8.54  | 8.64  | 0.22 | 0.20 | 4.3E-03 | 5.2E-03 |
| 3223605 | FBXW2    | 8.97  | 9.07  | 0.20 | 0.16 | 1.3E-03 | 2.1E-03 |
| 3572278 | NEK9     | 8.80  | 8.90  | 0.18 | 0.20 | 3.0E-03 | 3.9E-03 |
| 3888055 | ARFGEF2  | 8.61  | 8.71  | 0.21 | 0.24 | 6.0E-03 | 6.6E-03 |
| 3329724 | MADD     | 8.36  | 8.46  | 0.20 | 0.19 | 1.7E-03 | 2.6E-03 |
| 3946563 | RBX1     | 9.48  | 9.57  | 0.23 | 0.17 | 3.3E-03 | 4.2E-03 |

## AJHG, Volume 82

|         |          |       |       |      |      |         |         |
|---------|----------|-------|-------|------|------|---------|---------|
| 3932131 | DSCR2    | 7.81  | 7.91  | 0.19 | 0.20 | 1.1E-03 | 1.8E-03 |
| 3190035 | CDK9     | 9.27  | 9.37  | 0.17 | 0.18 | 1.5E-03 | 2.4E-03 |
| 3452231 | SLC38A1  | 10.87 | 10.97 | 0.26 | 0.21 | 8.9E-03 | 8.9E-03 |
| 3457549 | ANKRD52  | 6.50  | 6.59  | 0.18 | 0.23 | 4.8E-03 | 5.6E-03 |
| 2675628 | VPRBP    | 8.58  | 8.68  | 0.23 | 0.25 | 9.1E-03 | 9.0E-03 |
| 3755359 | PIP5K2B  | 7.96  | 8.06  | 0.19 | 0.26 | 4.6E-03 | 5.4E-03 |
| 3724824 | TBKBP1   | 6.58  | 6.68  | 0.21 | 0.26 | 7.8E-03 | 8.0E-03 |
| 3881443 | TPX2     | 9.32  | 9.43  | 0.28 | 0.24 | 8.9E-03 | 8.9E-03 |
| 3985866 | CXorf39  | 7.83  | 7.93  | 0.19 | 0.20 | 6.1E-04 | 1.2E-03 |
| 3995371 | NSDHL    | 7.87  | 7.97  | 0.22 | 0.25 | 7.6E-03 | 7.9E-03 |
| 3192171 | POMT1    | 6.99  | 7.09  | 0.18 | 0.15 | 1.2E-04 | 3.5E-04 |
| 3951887 | ATP6V1E1 | 9.24  | 9.34  | 0.24 | 0.25 | 1.0E-02 | 9.7E-03 |
| 2407191 | GNL2     | 9.00  | 9.11  | 0.23 | 0.24 | 6.2E-03 | 6.7E-03 |
| 3214359 | AUH      | 6.73  | 6.83  | 0.23 | 0.26 | 3.2E-03 | 4.1E-03 |
| 3886704 | STK4     | 10.07 | 10.17 | 0.20 | 0.17 | 1.8E-03 | 2.7E-03 |
| 3131720 | BRF2     | 7.36  | 7.46  | 0.22 | 0.22 | 3.6E-03 | 4.5E-03 |
| 3421630 | CCT2     | 10.27 | 10.38 | 0.22 | 0.23 | 4.7E-03 | 5.5E-03 |
| 2892979 | CDYL     | 8.27  | 8.37  | 0.24 | 0.22 | 9.4E-03 | 9.2E-03 |
| 2760371 | WDR1     | 11.06 | 11.16 | 0.21 | 0.23 | 9.5E-03 | 9.3E-03 |
| 3729172 | CLTC     | 10.16 | 10.26 | 0.22 | 0.22 | 5.7E-03 | 6.3E-03 |
| 3535000 | LOC64460 | 9.83  | 9.93  | 0.18 | 0.20 | 1.8E-03 | 2.7E-03 |
| 3705641 | TIMM22   | 8.84  | 8.94  | 0.19 | 0.22 | 2.7E-03 | 3.6E-03 |
| 3813604 | ZADH2    | 7.68  | 7.78  | 0.22 | 0.21 | 2.5E-03 | 3.4E-03 |
| 3740462 | RILP     | 6.75  | 6.85  | 0.22 | 0.22 | 4.9E-03 | 5.6E-03 |
| 2881521 | RBM22    | 8.80  | 8.91  | 0.23 | 0.27 | 6.4E-03 | 6.9E-03 |
| 3294242 | ECD      | 8.88  | 8.99  | 0.24 | 0.21 | 4.3E-03 | 5.1E-03 |
| 3724782 | KPNB1    | 10.20 | 10.31 | 0.25 | 0.24 | 4.1E-03 | 5.0E-03 |
| 3923498 | PWP2H    | 7.68  | 7.79  | 0.23 | 0.25 | 7.5E-03 | 7.8E-03 |
| 3293187 | AMID     | 6.94  | 7.04  | 0.24 | 0.24 | 4.4E-03 | 5.2E-03 |
| 3212143 | UBQLN1   | 9.12  | 9.23  | 0.27 | 0.23 | 4.2E-03 | 5.1E-03 |
| 4003954 | TAB3     | 8.12  | 8.22  | 0.26 | 0.27 | 9.7E-03 | 9.4E-03 |
| 3453177 | SNORA34  | 7.62  | 7.73  | 0.28 | 0.25 | 8.3E-03 | 8.5E-03 |
| 3579205 | SETD3    | 7.94  | 8.04  | 0.27 | 0.26 | 8.6E-03 | 8.7E-03 |



## AJHG, Volume 82

|         |          |       |       |      |      |         |         |
|---------|----------|-------|-------|------|------|---------|---------|
| 3770721 | SLC25A19 | 7.30  | 7.41  | 0.27 | 0.22 | 8.8E-03 | 8.8E-03 |
| 3837001 | GRLF1    | 8.19  | 8.30  | 0.23 | 0.26 | 6.9E-03 | 7.4E-03 |
| 3190659 | LOC64681 | 11.40 | 11.50 | 0.18 | 0.20 | 3.2E-04 | 7.4E-04 |
| 3476265 | EIF2B1   | 9.46  | 9.57  | 0.21 | 0.16 | 1.4E-03 | 2.1E-03 |
| 3829575 | LSM14A   | 9.89  | 10.00 | 0.14 | 0.15 | 1.0E-05 | 5.7E-05 |
| 3015178 | ZNF38    | 6.63  | 6.74  | 0.22 | 0.24 | 2.8E-03 | 3.7E-03 |
| 3331433 | ZDHHC5   | 8.82  | 8.93  | 0.22 | 0.18 | 9.0E-04 | 1.6E-03 |
| 3749086 | AKAP10   | 7.46  | 7.57  | 0.29 | 0.29 | 8.8E-03 | 8.8E-03 |
| 3850409 | FLJ12949 | 7.01  | 7.12  | 0.19 | 0.17 | 4.5E-04 | 9.7E-04 |
| 3804195 | SLC39A6  | 8.27  | 8.38  | 0.22 | 0.22 | 1.8E-03 | 2.6E-03 |
| 3139035 | ARFGEF1  | 7.87  | 7.98  | 0.30 | 0.25 | 8.7E-03 | 8.7E-03 |
| 3288845 | PARG     | 7.23  | 7.34  | 0.26 | 0.27 | 5.8E-03 | 6.4E-03 |
| 3637006 | SEC11L1  | 7.78  | 7.89  | 0.16 | 0.23 | 1.3E-03 | 2.0E-03 |
| 3923218 | KIAA0179 | 8.22  | 8.33  | 0.24 | 0.26 | 6.5E-03 | 7.0E-03 |
| 3781734 | C18orf8  | 8.65  | 8.77  | 0.23 | 0.25 | 4.5E-03 | 5.3E-03 |
| 3412345 | TMEM117  | 6.52  | 6.63  | 0.33 | 0.25 | 7.7E-03 | 7.9E-03 |
| 3717737 | PSMD11   | 9.54  | 9.65  | 0.27 | 0.26 | 9.2E-03 | 9.1E-03 |
| 2330334 | C1orf113 | 9.11  | 9.22  | 0.27 | 0.25 | 3.9E-03 | 4.7E-03 |
| 3192525 | GTF3C4   | 8.23  | 8.34  | 0.24 | 0.27 | 9.1E-03 | 9.0E-03 |
| 3924573 | PCNT     | 7.16  | 7.27  | 0.19 | 0.19 | 5.1E-04 | 1.1E-03 |
| 3982811 | SH3BGRL  | 10.20 | 10.31 | 0.26 | 0.22 | 3.6E-03 | 4.5E-03 |
| 3957873 | EIF4ENIF | 8.21  | 8.32  | 0.27 | 0.24 | 1.0E-02 | 9.6E-03 |
| 2695393 | SNORA58  | 10.29 | 10.40 | 0.23 | 0.25 | 4.8E-03 | 5.6E-03 |
| 3405297 | LOH12CR1 | 7.05  | 7.17  | 0.27 | 0.27 | 9.0E-03 | 8.9E-03 |
| 3683037 | ARL6IP   | 11.38 | 11.49 | 0.20 | 0.19 | 5.0E-04 | 1.0E-03 |
| 3831917 | ZNF570   | 6.76  | 6.87  | 0.30 | 0.25 | 7.9E-03 | 8.1E-03 |
| 2636726 | QTRTD1   | 7.97  | 8.08  | 0.27 | 0.25 | 6.2E-03 | 6.7E-03 |
| 3789442 | WDR7     | 7.51  | 7.62  | 0.23 | 0.21 | 2.1E-03 | 3.0E-03 |
| 3647632 | PRO0149  | 8.71  | 8.83  | 0.24 | 0.23 | 3.7E-03 | 4.5E-03 |
| 3231846 | WDR37    | 7.04  | 7.16  | 0.21 | 0.24 | 1.3E-03 | 2.0E-03 |
| 2937984 | TBP      | 7.86  | 7.97  | 0.31 | 0.27 | 6.0E-03 | 6.5E-03 |
| 3606304 | AKAP13   | 8.81  | 8.93  | 0.24 | 0.22 | 2.5E-03 | 3.4E-03 |
| 3293963 | DNAJB12  | 6.97  | 7.08  | 0.13 | 0.17 | 1.8E-05 | 8.6E-05 |

## AJHG, Volume 82

|         |          |       |       |      |      |         |         |
|---------|----------|-------|-------|------|------|---------|---------|
| 3400625 | ADIPOR2  | 8.07  | 8.18  | 0.22 | 0.23 | 2.1E-03 | 3.0E-03 |
| 2971014 | TSPYL1   | 8.52  | 8.63  | 0.22 | 0.21 | 1.3E-03 | 2.1E-03 |
| 4026669 | BCAP31   | 9.23  | 9.34  | 0.26 | 0.25 | 6.3E-03 | 6.8E-03 |
| 2904248 | SNRPC    | 8.64  | 8.75  | 0.22 | 0.24 | 3.3E-03 | 4.2E-03 |
| 3908149 | PRKCBP1  | 8.35  | 8.46  | 0.25 | 0.22 | 4.8E-03 | 5.6E-03 |
| 3203135 | TOPORS   | 6.71  | 6.83  | 0.27 | 0.24 | 5.0E-03 | 5.7E-03 |
| 3843934 | LOC11338 | 8.63  | 8.75  | 0.18 | 0.20 | 2.3E-04 | 5.9E-04 |
| 2383312 | PSEN2    | 6.58  | 6.69  | 0.25 | 0.28 | 8.3E-03 | 8.4E-03 |
| 3678395 | N-PAC    | 8.77  | 8.89  | 0.16 | 0.22 | 6.7E-04 | 1.3E-03 |
| 3537264 | C14orf10 | 7.50  | 7.62  | 0.22 | 0.24 | 1.1E-03 | 1.9E-03 |
| 3630912 | ANP32A   | 7.49  | 7.61  | 0.22 | 0.21 | 1.9E-03 | 2.8E-03 |
| 3569401 | RDH11    | 8.87  | 8.98  | 0.28 | 0.24 | 5.0E-03 | 5.8E-03 |
| 3919124 | C21orf51 | 7.12  | 7.24  | 0.22 | 0.21 | 5.3E-04 | 1.1E-03 |
| 3114358 | FAM91A1  | 7.53  | 7.64  | 0.21 | 0.24 | 4.3E-03 | 5.1E-03 |
| 3436571 | AACS     | 7.91  | 8.02  | 0.24 | 0.24 | 3.2E-03 | 4.1E-03 |
| 3874249 | ITPA     | 7.46  | 7.57  | 0.22 | 0.21 | 1.1E-03 | 1.8E-03 |
| 3246372 | NCOA4    | 8.78  | 8.89  | 0.29 | 0.27 | 5.5E-03 | 6.2E-03 |
| 2469296 | FLJ25102 | 6.87  | 6.99  | 0.20 | 0.20 | 6.5E-04 | 1.2E-03 |
| 3190939 | PPP2R4   | 8.87  | 8.99  | 0.29 | 0.23 | 7.8E-03 | 8.1E-03 |
| 3596008 | C15orf31 | 6.53  | 6.64  | 0.21 | 0.22 | 1.3E-03 | 2.1E-03 |
| 2593464 | LOC64201 | 8.63  | 8.75  | 0.30 | 0.25 | 6.0E-03 | 6.6E-03 |
| 3769969 | FAM104A  | 8.89  | 9.01  | 0.16 | 0.18 | 4.4E-05 | 1.7E-04 |
| 3354799 | CHEK1    | 8.20  | 8.32  | 0.29 | 0.26 | 5.7E-03 | 6.3E-03 |
| 3135184 | RB1CC1   | 6.71  | 6.83  | 0.28 | 0.32 | 1.0E-02 | 1.0E-02 |
| 3651588 | LOC57149 | 6.83  | 6.95  | 0.28 | 0.29 | 8.1E-03 | 8.2E-03 |
| 3979659 | MSN      | 11.55 | 11.67 | 0.16 | 0.18 | 3.4E-05 | 1.4E-04 |
| 3417574 | SPRYD4   | 7.20  | 7.32  | 0.32 | 0.30 | 7.6E-03 | 7.9E-03 |
| 2610044 | JAGN1    | 9.22  | 9.34  | 0.27 | 0.27 | 5.6E-03 | 6.3E-03 |
| 3429365 | TDG      | 8.04  | 8.16  | 0.23 | 0.20 | 5.4E-04 | 1.1E-03 |
| 3873699 | STK35    | 8.05  | 8.17  | 0.20 | 0.21 | 5.6E-04 | 1.1E-03 |
| 3440921 | EFCAB4B  | 6.82  | 6.93  | 0.24 | 0.24 | 4.1E-03 | 5.0E-03 |
| 2621275 | KLHL18   | 7.77  | 7.89  | 0.26 | 0.29 | 9.0E-03 | 8.9E-03 |
| 2436938 | PBXIP1   | 7.29  | 7.40  | 0.30 | 0.25 | 7.4E-03 | 7.8E-03 |

## AJHG, Volume 82

|         |          |       |       |      |      |         |         |
|---------|----------|-------|-------|------|------|---------|---------|
| 3352070 | CBL      | 8.81  | 8.93  | 0.24 | 0.21 | 9.6E-04 | 1.7E-03 |
| 3016692 | LOC39271 | 7.27  | 7.39  | 0.27 | 0.23 | 8.7E-04 | 1.6E-03 |
| 3791168 | KIAA1468 | 7.89  | 8.01  | 0.27 | 0.31 | 9.5E-03 | 9.3E-03 |
| 3042421 | HNRPA2B1 | 11.59 | 11.70 | 0.24 | 0.24 | 2.3E-03 | 3.2E-03 |
| 2901620 | LOC64204 | 11.71 | 11.83 | 0.20 | 0.26 | 4.3E-03 | 5.2E-03 |
| 3147321 | LOC64210 | 9.92  | 10.04 | 0.22 | 0.21 | 5.8E-04 | 1.1E-03 |
| 2572601 | CCDC93   | 7.28  | 7.40  | 0.28 | 0.27 | 7.3E-03 | 7.7E-03 |
| 3331926 | FAM111A  | 9.00  | 9.12  | 0.29 | 0.24 | 4.9E-03 | 5.7E-03 |
| 3740126 | LOC44091 | 11.50 | 11.62 | 0.31 | 0.27 | 7.3E-03 | 7.7E-03 |
| 3859622 | FLJ38451 | 6.34  | 6.46  | 0.24 | 0.25 | 2.7E-03 | 3.6E-03 |
| 3378411 | RBM4B    | 8.39  | 8.51  | 0.23 | 0.24 | 1.9E-03 | 2.8E-03 |
| 3578278 | C14orf10 | 7.58  | 7.70  | 0.28 | 0.29 | 6.1E-03 | 6.6E-03 |
| 7385696 | SHFM1    | 8.47  | 8.59  | 0.28 | 0.24 | 3.2E-03 | 4.1E-03 |
| 3531355 | NUBPL    | 6.69  | 6.81  | 0.29 | 0.26 | 3.4E-03 | 4.3E-03 |
| 2356142 | LIX1L    | 8.27  | 8.39  | 0.29 | 0.26 | 3.0E-03 | 3.9E-03 |
| 3978424 | RP1-112K | 7.29  | 7.41  | 0.24 | 0.19 | 5.8E-04 | 1.1E-03 |
| 4017961 | AMMECR1  | 7.45  | 7.57  | 0.24 | 0.27 | 4.7E-03 | 5.5E-03 |
| 3105777 | LOC65289 | 7.60  | 7.72  | 0.27 | 0.29 | 9.0E-03 | 9.0E-03 |
| 2444842 | KIAA0040 | 7.91  | 8.03  | 0.32 | 0.30 | 9.1E-03 | 9.0E-03 |
| 2614517 | OXSM     | 7.20  | 7.32  | 0.30 | 0.24 | 4.8E-03 | 5.5E-03 |
| 3129121 | CCDC25   | 8.27  | 8.39  | 0.26 | 0.24 | 1.1E-03 | 1.9E-03 |
| 2834093 | TCERG1   | 9.17  | 9.29  | 0.24 | 0.23 | 2.0E-03 | 2.9E-03 |
| 3355114 | DCPS     | 8.62  | 8.74  | 0.25 | 0.25 | 3.5E-03 | 4.4E-03 |
| 3189580 | ZBTB43   | 6.70  | 6.83  | 0.19 | 0.23 | 6.7E-04 | 1.3E-03 |
| 3683050 | LOC44034 | 8.84  | 8.96  | 0.28 | 0.27 | 5.7E-03 | 6.3E-03 |
| 3679564 | USP7     | 10.06 | 10.18 | 0.20 | 0.16 | 7.0E-05 | 2.4E-04 |
| 2348854 | FLJ44815 | 9.17  | 9.29  | 0.27 | 0.24 | 5.0E-03 | 5.8E-03 |
| 3564071 | NIN      | 8.61  | 8.74  | 0.32 | 0.28 | 9.4E-03 | 9.2E-03 |
| 3139882 | TRAM1    | 10.12 | 10.24 | 0.24 | 0.25 | 2.2E-03 | 3.1E-03 |
| 3722152 | PSME3    | 9.48  | 9.60  | 0.31 | 0.25 | 4.2E-03 | 5.1E-03 |
| 3617230 | C15orf24 | 8.50  | 8.62  | 0.24 | 0.23 | 1.7E-03 | 2.5E-03 |
| 3972929 | LOC64646 | 7.07  | 7.20  | 0.27 | 0.26 | 2.0E-03 | 2.9E-03 |
| 2562685 | IMMT     | 9.55  | 9.67  | 0.25 | 0.18 | 2.3E-03 | 3.2E-03 |

## AJHG, Volume 82

|         |          |       |       |      |      |         |         |
|---------|----------|-------|-------|------|------|---------|---------|
| 3374856 | MRPL16   | 7.65  | 7.77  | 0.28 | 0.28 | 5.5E-03 | 6.2E-03 |
| 3751323 | TIAF1    | 7.53  | 7.65  | 0.24 | 0.24 | 5.5E-03 | 6.2E-03 |
| 3669092 | TERF2IP  | 9.15  | 9.27  | 0.23 | 0.21 | 5.4E-04 | 1.1E-03 |
| 2359736 | C1orf77  | 8.64  | 8.77  | 0.16 | 0.19 | 1.2E-04 | 3.5E-04 |
| 3765642 | INTS2    | 7.89  | 8.01  | 0.26 | 0.20 | 7.6E-04 | 1.4E-03 |
| 3674602 | AFG3L1   | 7.08  | 7.21  | 0.28 | 0.29 | 4.2E-03 | 5.0E-03 |
| 3812206 | TXNDC10  | 7.69  | 7.82  | 0.32 | 0.29 | 9.9E-03 | 9.6E-03 |
| 3405396 | CREBL2   | 7.27  | 7.40  | 0.31 | 0.25 | 3.9E-03 | 4.8E-03 |
| 2795819 | DCTD     | 9.78  | 9.91  | 0.25 | 0.25 | 6.7E-03 | 7.1E-03 |
| 3730806 | MAP3K3   | 6.86  | 6.98  | 0.22 | 0.21 | 5.5E-04 | 1.1E-03 |
| 3282213 | YME1L1   | 9.82  | 9.95  | 0.27 | 0.29 | 6.6E-03 | 7.1E-03 |
| 3311715 | UROS     | 9.35  | 9.47  | 0.31 | 0.29 | 9.1E-03 | 9.0E-03 |
| 3209497 | C9orf77  | 7.50  | 7.62  | 0.23 | 0.25 | 1.1E-03 | 1.8E-03 |
| 3629378 | MTFMT    | 7.69  | 7.81  | 0.22 | 0.24 | 1.0E-03 | 1.8E-03 |
| 3904189 | NFS1     | 8.22  | 8.34  | 0.28 | 0.26 | 3.5E-03 | 4.4E-03 |
| 3888217 | DDX27    | 8.48  | 8.60  | 0.14 | 0.17 | 7.8E-06 | 4.6E-05 |
| 3160773 | RCL1     | 7.98  | 8.10  | 0.25 | 0.28 | 5.5E-03 | 6.2E-03 |
| 3340032 | MRPL48   | 6.34  | 6.47  | 0.31 | 0.27 | 4.3E-03 | 5.1E-03 |
| 3417146 | CDK2     | 9.02  | 9.15  | 0.29 | 0.29 | 7.3E-03 | 7.7E-03 |
| 3471224 | ATPBD1C  | 7.06  | 7.19  | 0.26 | 0.28 | 6.1E-03 | 6.6E-03 |
| 3014957 | ZNF498   | 6.38  | 6.51  | 0.19 | 0.27 | 1.5E-03 | 2.3E-03 |
| 3168415 | CLTA     | 9.15  | 9.27  | 0.22 | 0.25 | 1.2E-03 | 2.0E-03 |
| 2527606 | ARPC2    | 11.43 | 11.55 | 0.23 | 0.19 | 1.2E-04 | 3.6E-04 |
| 3649052 | FAM18B   | 7.25  | 7.37  | 0.25 | 0.26 | 3.2E-03 | 4.1E-03 |
| 3981027 | TAF1L    | 7.29  | 7.41  | 0.27 | 0.23 | 2.0E-03 | 2.9E-03 |
| 3633522 | RNUT1    | 7.39  | 7.51  | 0.24 | 0.25 | 2.5E-03 | 3.4E-03 |
| 3532313 | LOC65063 | 8.99  | 9.11  | 0.27 | 0.29 | 2.5E-03 | 3.4E-03 |
| 2705748 | AADACL1  | 7.34  | 7.46  | 0.27 | 0.31 | 7.8E-03 | 8.0E-03 |
| 3806913 | SMAD2    | 8.61  | 8.74  | 0.27 | 0.24 | 1.6E-03 | 2.4E-03 |
| 3902051 | NANP     | 7.27  | 7.39  | 0.29 | 0.22 | 2.6E-03 | 3.5E-03 |
| 2750227 | FLJ11184 | 8.18  | 8.31  | 0.32 | 0.29 | 7.8E-03 | 8.0E-03 |
| 2831209 | PAIP2    | 9.70  | 9.83  | 0.29 | 0.31 | 9.5E-03 | 9.3E-03 |
| 3913544 | DIDO1    | 8.33  | 8.46  | 0.24 | 0.25 | 1.9E-03 | 2.8E-03 |

## AJHG, Volume 82

|         |          |       |       |      |      |         |         |
|---------|----------|-------|-------|------|------|---------|---------|
| 2468920 | CPSF3    | 8.78  | 8.91  | 0.31 | 0.28 | 5.9E-03 | 6.5E-03 |
| 2475209 | SPDYA    | 9.35  | 9.47  | 0.24 | 0.21 | 8.8E-04 | 1.6E-03 |
| 3298738 | WAPAL    | 8.20  | 8.32  | 0.28 | 0.26 | 2.3E-03 | 3.2E-03 |
| 3883309 | CEP250   | 6.30  | 6.42  | 0.17 | 0.18 | 8.1E-05 | 2.6E-04 |
| 7385683 | VPS41    | 8.75  | 8.88  | 0.30 | 0.27 | 6.2E-03 | 6.7E-03 |
| 3799167 | MPPE1    | 6.60  | 6.73  | 0.24 | 0.32 | 5.8E-03 | 6.4E-03 |
| 2688759 | ATG3     | 8.55  | 8.67  | 0.31 | 0.30 | 1.0E-02 | 9.7E-03 |
| 3651057 | MGC16824 | 7.88  | 8.01  | 0.26 | 0.25 | 6.2E-04 | 1.2E-03 |
| 3781654 | RIOK3    | 9.29  | 9.42  | 0.24 | 0.22 | 1.1E-03 | 1.9E-03 |
| 3687752 | 1-Sep    | 9.44  | 9.56  | 0.30 | 0.25 | 5.7E-03 | 6.3E-03 |
| 2358700 | MGC29891 | 6.55  | 6.68  | 0.32 | 0.28 | 3.9E-03 | 4.8E-03 |
| 2756029 | LOC28378 | 9.80  | 9.93  | 0.27 | 0.32 | 6.7E-03 | 7.2E-03 |
| 3706736 | TMEM93   | 8.43  | 8.56  | 0.29 | 0.28 | 6.1E-03 | 6.6E-03 |
| 3167220 | FLJ39257 | 9.37  | 9.50  | 0.23 | 0.28 | 2.7E-03 | 3.6E-03 |
| 3425108 | C12orf29 | 7.03  | 7.15  | 0.36 | 0.29 | 9.1E-03 | 9.0E-03 |
| 3846709 | STAP2    | 6.94  | 7.07  | 0.27 | 0.26 | 4.2E-03 | 5.0E-03 |
| 2953435 | LOC65214 | 8.06  | 8.19  | 0.28 | 0.29 | 5.5E-03 | 6.2E-03 |
| 3642060 | CHSY1    | 8.04  | 8.17  | 0.21 | 0.22 | 6.2E-04 | 1.2E-03 |
| 2359036 | SNX27    | 7.66  | 7.78  | 0.30 | 0.33 | 6.7E-03 | 7.2E-03 |
| 3771297 | SRP68    | 8.86  | 8.99  | 0.25 | 0.24 | 7.8E-04 | 1.4E-03 |
| 3388914 | DCUN1D5  | 8.37  | 8.50  | 0.21 | 0.25 | 2.7E-04 | 6.6E-04 |
| 3014714 | LOC65388 | 10.68 | 10.80 | 0.20 | 0.21 | 5.0E-04 | 1.0E-03 |
| 3548788 | CPSF2    | 9.08  | 9.21  | 0.30 | 0.27 | 5.7E-03 | 6.3E-03 |
| 3159330 | DOCK8    | 9.45  | 9.58  | 0.35 | 0.26 | 6.1E-03 | 6.6E-03 |
| 3474619 | POP5     | 7.40  | 7.53  | 0.27 | 0.25 | 2.8E-03 | 3.8E-03 |
| 3716048 | TAOK1    | 8.00  | 8.13  | 0.29 | 0.33 | 9.5E-03 | 9.3E-03 |
| 3580179 | LOC64530 | 11.93 | 12.05 | 0.20 | 0.24 | 4.0E-04 | 8.8E-04 |
| 2317434 | FAM79A   | 7.83  | 7.96  | 0.29 | 0.30 | 7.7E-03 | 8.0E-03 |
| 3260423 | CUTC     | 7.96  | 8.09  | 0.21 | 0.21 | 1.4E-04 | 4.1E-04 |
| 2572595 | CCDC93   | 6.56  | 6.68  | 0.33 | 0.32 | 9.9E-03 | 9.6E-03 |
| 3945585 | APOBEC3D | 8.90  | 9.03  | 0.25 | 0.27 | 4.1E-03 | 5.0E-03 |
| 2999640 | UBE2D4   | 7.08  | 7.21  | 0.23 | 0.24 | 4.1E-04 | 9.1E-04 |
| 3673723 | HSPC176  | 7.24  | 7.37  | 0.26 | 0.31 | 7.0E-03 | 7.4E-03 |

## AJHG, Volume 82

|         |          |       |       |      |      |         |         |
|---------|----------|-------|-------|------|------|---------|---------|
| 2715634 | ADD1     | 9.46  | 9.59  | 0.22 | 0.22 | 5.5E-04 | 1.1E-03 |
| 3430129 | POLR3B   | 6.74  | 6.87  | 0.26 | 0.25 | 5.1E-04 | 1.0E-03 |
| 2520138 | FLJ20160 | 9.17  | 9.30  | 0.30 | 0.23 | 5.1E-03 | 5.8E-03 |
| 3662041 | OGFOD1   | 8.93  | 9.06  | 0.27 | 0.24 | 2.4E-03 | 3.3E-03 |
| 3851055 | ELOF1    | 9.47  | 9.60  | 0.24 | 0.20 | 6.7E-04 | 1.3E-03 |
| 3641871 | LINS1    | 7.05  | 7.18  | 0.33 | 0.31 | 4.9E-03 | 5.7E-03 |
| 3337618 | SAPS3    | 9.18  | 9.31  | 0.24 | 0.21 | 4.1E-04 | 8.9E-04 |
| 3310725 | C10orf88 | 6.52  | 6.65  | 0.28 | 0.27 | 5.1E-03 | 5.8E-03 |
| 3565571 | WDHD1    | 7.94  | 8.07  | 0.29 | 0.29 | 3.7E-03 | 4.6E-03 |
| 3243078 | ZNF649   | 6.48  | 6.61  | 0.34 | 0.34 | 1.0E-02 | 9.8E-03 |
| 3929038 | C21orf45 | 8.20  | 8.34  | 0.20 | 0.18 | 4.3E-05 | 1.6E-04 |
| 3895022 | ZNF343   | 6.66  | 6.80  | 0.31 | 0.24 | 4.5E-03 | 5.3E-03 |
| 7385515 | MALAT1   | 11.85 | 11.98 | 0.27 | 0.25 | 5.1E-03 | 5.9E-03 |
| 3074039 | SLC35B4  | 7.83  | 7.96  | 0.28 | 0.28 | 6.9E-03 | 7.4E-03 |
| 2809885 | SKIV2L2  | 7.76  | 7.89  | 0.29 | 0.22 | 1.0E-03 | 1.7E-03 |
| 3048886 | PURB     | 7.61  | 7.74  | 0.27 | 0.26 | 1.2E-03 | 2.0E-03 |
| 2546008 | SUPT7L   | 7.26  | 7.39  | 0.31 | 0.34 | 6.0E-03 | 6.5E-03 |
| 2866590 | LYSMD3   | 7.91  | 8.04  | 0.33 | 0.30 | 4.0E-03 | 4.9E-03 |
| 3419849 | TBK1     | 8.38  | 8.51  | 0.29 | 0.28 | 2.3E-03 | 3.2E-03 |
| 3697632 | LOC64539 | 6.34  | 6.47  | 0.26 | 0.27 | 1.3E-03 | 2.1E-03 |
| 3251353 | C10orf10 | 9.06  | 9.19  | 0.33 | 0.26 | 7.1E-03 | 7.5E-03 |
| 3071636 | RBM28    | 6.86  | 6.99  | 0.23 | 0.23 | 8.6E-04 | 1.5E-03 |
| 2447454 | ARPC5    | 10.65 | 10.78 | 0.26 | 0.23 | 1.4E-03 | 2.3E-03 |
| 4015602 | LOC64704 | 7.35  | 7.48  | 0.23 | 0.22 | 3.2E-04 | 7.5E-04 |
| 2685034 | CGGBP1   | 9.70  | 9.83  | 0.29 | 0.25 | 1.9E-03 | 2.8E-03 |
| 3414186 | TEGT     | 10.75 | 10.88 | 0.24 | 0.21 | 6.6E-04 | 1.3E-03 |
| 2974188 | CRSP3    | 7.92  | 8.06  | 0.31 | 0.31 | 5.8E-03 | 6.4E-03 |
| 3559570 | FAM106B  | 8.77  | 8.90  | 0.21 | 0.20 | 1.3E-04 | 3.8E-04 |
| 2951300 | TAF11    | 7.75  | 7.88  | 0.31 | 0.34 | 8.2E-03 | 8.3E-03 |
| 3504434 | XPO4     | 7.87  | 8.00  | 0.32 | 0.31 | 7.7E-03 | 7.9E-03 |
| 2417174 | SERBP1   | 11.06 | 11.20 | 0.28 | 0.27 | 2.4E-03 | 3.3E-03 |
| 3463571 | PPP1R12A | 8.14  | 8.27  | 0.30 | 0.26 | 4.0E-03 | 4.9E-03 |
| 3202171 | PLAA     | 8.23  | 8.37  | 0.19 | 0.20 | 7.1E-05 | 2.4E-04 |

## AJHG, Volume 82

|         |          |       |       |      |      |         |         |
|---------|----------|-------|-------|------|------|---------|---------|
| 2709062 | SFRS10   | 10.04 | 10.17 | 0.23 | 0.24 | 5.7E-04 | 1.1E-03 |
| 3450180 | YARS2    | 7.29  | 7.42  | 0.27 | 0.33 | 7.3E-03 | 7.6E-03 |
| 3269662 | BCCIP    | 6.93  | 7.07  | 0.26 | 0.26 | 1.5E-03 | 2.3E-03 |
| 3762416 | ANKRD40  | 7.53  | 7.67  | 0.31 | 0.35 | 8.4E-03 | 8.5E-03 |
| 3331392 | HEAB     | 7.42  | 7.56  | 0.24 | 0.20 | 3.0E-04 | 7.1E-04 |
| 3878934 | NAT5     | 7.05  | 7.18  | 0.31 | 0.27 | 6.7E-03 | 7.2E-03 |
| 3883547 | PHF20    | 7.72  | 7.85  | 0.32 | 0.30 | 9.0E-03 | 8.9E-03 |
| 3728889 | TMEM49   | 9.41  | 9.54  | 0.23 | 0.23 | 2.4E-04 | 6.1E-04 |
| 3435902 | DDX55    | 6.98  | 7.11  | 0.34 | 0.28 | 7.9E-03 | 8.1E-03 |
| 2334706 | NSUN4    | 8.58  | 8.71  | 0.25 | 0.24 | 6.4E-04 | 1.2E-03 |
| 3417531 | COQ10A   | 6.97  | 7.10  | 0.26 | 0.25 | 8.7E-04 | 1.6E-03 |
| 2592268 | STAT1    | 11.56 | 11.70 | 0.26 | 0.24 | 5.6E-04 | 1.1E-03 |
| 3225456 | MAPKAP1  | 9.93  | 10.07 | 0.25 | 0.26 | 2.0E-03 | 3.0E-03 |
| 3770743 | LOC65324 | 9.71  | 9.84  | 0.22 | 0.18 | 9.0E-05 | 2.9E-04 |
| 3359751 | ZNF195   | 7.88  | 8.02  | 0.33 | 0.27 | 5.7E-03 | 6.4E-03 |
| 3076340 | BRAF     | 8.87  | 9.00  | 0.34 | 0.32 | 9.8E-03 | 9.5E-03 |
| 3708764 | TNFSF12  | 6.54  | 6.67  | 0.34 | 0.32 | 7.9E-03 | 8.1E-03 |
| 3091797 | EXTL3    | 7.05  | 7.18  | 0.26 | 0.31 | 3.8E-03 | 4.7E-03 |
| 4016572 | MORF4L2  | 9.58  | 9.71  | 0.32 | 0.25 | 9.7E-04 | 1.7E-03 |
| 2485433 | AFTIPHIL | 9.38  | 9.51  | 0.20 | 0.25 | 8.4E-04 | 1.5E-03 |
| 3952543 | SLC25A1  | 9.01  | 9.15  | 0.30 | 0.25 | 2.9E-03 | 3.8E-03 |
| 2321238 | PRDM2    | 7.61  | 7.75  | 0.27 | 0.31 | 5.5E-03 | 6.2E-03 |
| 3684782 | CDR2     | 8.39  | 8.52  | 0.25 | 0.29 | 2.5E-03 | 3.4E-03 |
| 3847252 | SAFB2    | 7.49  | 7.62  | 0.28 | 0.34 | 7.3E-03 | 7.7E-03 |
| 3397589 | ETS1     | 10.38 | 10.51 | 0.33 | 0.25 | 3.6E-03 | 4.5E-03 |
| 2679864 | PSMD6    | 9.35  | 9.49  | 0.26 | 0.28 | 3.5E-03 | 4.4E-03 |
| 3164914 | LOC64639 | 6.98  | 7.11  | 0.22 | 0.21 | 3.0E-05 | 1.3E-04 |
| 3275132 | LOC64261 | 11.91 | 12.05 | 0.12 | 0.15 | 1.5E-07 | 2.5E-06 |
| 3765299 | APPBP2   | 8.25  | 8.39  | 0.29 | 0.30 | 2.9E-03 | 3.8E-03 |
| 3739679 | VPS53    | 7.84  | 7.98  | 0.21 | 0.23 | 5.7E-05 | 2.0E-04 |
| 3719362 | AATF     | 8.75  | 8.89  | 0.32 | 0.28 | 4.8E-03 | 5.6E-03 |
| 2419113 | USP33    | 8.20  | 8.34  | 0.30 | 0.27 | 1.6E-03 | 2.4E-03 |
| 3874900 | CDS2     | 8.80  | 8.94  | 0.29 | 0.29 | 3.1E-03 | 4.0E-03 |

## AJHG, Volume 82

|         |          |       |       |      |      |         |         |
|---------|----------|-------|-------|------|------|---------|---------|
| 3219547 | IKBKAP   | 8.08  | 8.22  | 0.21 | 0.24 | 8.1E-05 | 2.6E-04 |
| 3464967 | GALNT4   | 6.69  | 6.83  | 0.29 | 0.25 | 3.1E-03 | 4.0E-03 |
| 3545466 | AHSA1    | 9.42  | 9.55  | 0.23 | 0.24 | 7.2E-04 | 1.4E-03 |
| 3354764 | STT3A    | 10.55 | 10.69 | 0.28 | 0.24 | 1.9E-03 | 2.8E-03 |
| 3335907 | SF3B2    | 8.97  | 9.11  | 0.16 | 0.19 | 2.3E-05 | 1.0E-04 |
| 3499453 | TPP2     | 9.13  | 9.27  | 0.26 | 0.23 | 2.0E-04 | 5.2E-04 |
| 3593652 | USP8     | 7.27  | 7.41  | 0.31 | 0.30 | 3.7E-03 | 4.5E-03 |
| 3735107 | SAP30BP  | 7.84  | 7.97  | 0.25 | 0.24 | 8.3E-04 | 1.5E-03 |
| 3448428 | C12orf11 | 8.73  | 8.87  | 0.35 | 0.32 | 8.5E-03 | 8.6E-03 |
| 3649245 | BFAR     | 8.43  | 8.57  | 0.26 | 0.24 | 1.4E-03 | 2.2E-03 |
| 2622912 | MAPKAPK3 | 7.63  | 7.77  | 0.24 | 0.30 | 4.9E-03 | 5.7E-03 |
| 3734575 | ICT1     | 8.15  | 8.29  | 0.27 | 0.24 | 7.9E-04 | 1.5E-03 |
| 2408189 | PPT1     | 8.99  | 9.13  | 0.28 | 0.27 | 2.1E-03 | 3.0E-03 |
| 3831698 | ZNF658   | 6.83  | 6.97  | 0.39 | 0.28 | 7.3E-03 | 7.7E-03 |
| 2440117 | COPA     | 8.01  | 8.15  | 0.32 | 0.29 | 8.8E-03 | 8.8E-03 |
| 3523881 | KDELC1   | 6.69  | 6.82  | 0.33 | 0.33 | 1.0E-02 | 9.8E-03 |
| 3891643 | C20orf17 | 6.98  | 7.12  | 0.28 | 0.29 | 2.7E-03 | 3.6E-03 |
| 3974708 | USP9X    | 9.27  | 9.41  | 0.31 | 0.32 | 6.7E-03 | 7.2E-03 |
| 3543411 | RBM25    | 7.80  | 7.94  | 0.31 | 0.28 | 3.5E-03 | 4.4E-03 |
| 3580791 | BAG5     | 7.92  | 8.06  | 0.30 | 0.29 | 4.7E-03 | 5.5E-03 |
| 3687698 | CD2BP2   | 7.63  | 7.77  | 0.26 | 0.26 | 1.6E-03 | 2.4E-03 |
| 2643157 | CDV3     | 11.16 | 11.30 | 0.24 | 0.23 | 4.2E-04 | 9.1E-04 |
| 3727962 | DGKE     | 6.96  | 7.10  | 0.27 | 0.30 | 1.3E-03 | 2.1E-03 |
| 3615985 | MTMR10   | 7.22  | 7.36  | 0.27 | 0.26 | 1.5E-03 | 2.3E-03 |
| 3576014 | C14orf10 | 6.57  | 6.70  | 0.23 | 0.27 | 1.3E-03 | 2.1E-03 |
| 3504617 | C13orf3  | 7.21  | 7.35  | 0.35 | 0.32 | 8.9E-03 | 8.9E-03 |
| 3627363 | NARG2    | 7.89  | 8.03  | 0.30 | 0.31 | 4.2E-03 | 5.1E-03 |
| 3537813 | ACTR10   | 6.98  | 7.12  | 0.25 | 0.26 | 7.1E-04 | 1.3E-03 |
| 3210130 | C9orf41  | 7.22  | 7.35  | 0.33 | 0.27 | 2.6E-03 | 3.5E-03 |
| 2992863 | C7orf30  | 8.30  | 8.44  | 0.30 | 0.22 | 6.3E-04 | 1.2E-03 |
| 3732885 | PRKAR1A  | 10.71 | 10.85 | 0.20 | 0.19 | 1.4E-05 | 7.2E-05 |
| 2347096 | DR1      | 8.73  | 8.87  | 0.21 | 0.22 | 2.3E-04 | 5.9E-04 |
| 2676471 | TMEM110  | 8.06  | 8.20  | 0.29 | 0.29 | 6.1E-03 | 6.6E-03 |



AJHG, Volume 82

|         |          |       |       |      |      |         |         |
|---------|----------|-------|-------|------|------|---------|---------|
| 2982381 | TCP1     | 11.79 | 11.93 | 0.18 | 0.17 | 7.3E-06 | 4.4E-05 |
| 3096545 | FLJ23356 | 7.85  | 7.99  | 0.32 | 0.33 | 1.0E-02 | 9.6E-03 |
| 3183757 | RAD23B   | 7.93  | 8.07  | 0.26 | 0.25 | 1.0E-03 | 1.8E-03 |
| 3536650 | SOCS4    | 7.63  | 7.77  | 0.36 | 0.31 | 7.1E-03 | 7.5E-03 |
| 3235726 | OPTN     | 8.45  | 8.59  | 0.33 | 0.26 | 2.7E-03 | 3.6E-03 |
| 3619773 | INOC1    | 7.69  | 7.83  | 0.23 | 0.24 | 3.7E-04 | 8.2E-04 |
| 4021633 | COVA1    | 6.73  | 6.87  | 0.26 | 0.27 | 7.1E-04 | 1.3E-03 |
| 3354731 | EI24     | 9.38  | 9.52  | 0.32 | 0.27 | 3.8E-03 | 4.7E-03 |
| 3940185 | SNRPD3   | 9.64  | 9.78  | 0.31 | 0.30 | 3.3E-03 | 4.2E-03 |
| 3541137 | EIF2S1   | 9.56  | 9.70  | 0.27 | 0.22 | 5.3E-04 | 1.1E-03 |
| 3458216 | ZBTB39   | 7.10  | 7.25  | 0.25 | 0.26 | 1.1E-03 | 1.8E-03 |
| 3229943 | SDCCAG3  | 7.42  | 7.56  | 0.22 | 0.26 | 5.7E-04 | 1.1E-03 |
| 2320762 | VPS13D   | 7.14  | 7.28  | 0.27 | 0.30 | 3.5E-03 | 4.4E-03 |
| 3829857 | LOC65335 | 7.16  | 7.30  | 0.26 | 0.30 | 2.4E-03 | 3.3E-03 |
| 3012633 | GATAD1   | 8.37  | 8.51  | 0.32 | 0.32 | 6.3E-03 | 6.8E-03 |
| 2593670 | SF3B1    | 10.38 | 10.52 | 0.25 | 0.23 | 6.4E-04 | 1.2E-03 |
| 2364155 | UHMK1    | 9.85  | 10.00 | 0.24 | 0.25 | 1.8E-03 | 2.6E-03 |
| 2888519 | RAP80    | 8.26  | 8.40  | 0.25 | 0.27 | 1.0E-03 | 1.8E-03 |
| 2356344 | ZNF364   | 8.22  | 8.36  | 0.32 | 0.37 | 9.5E-03 | 9.3E-03 |
| 2738697 | CYP2U1   | 6.37  | 6.51  | 0.29 | 0.29 | 3.4E-03 | 4.3E-03 |
| 2514658 | ZNF650   | 7.31  | 7.45  | 0.32 | 0.35 | 7.5E-03 | 7.8E-03 |
| 3119735 | ZNF623   | 6.41  | 6.55  | 0.38 | 0.33 | 5.8E-03 | 6.4E-03 |
| 3924783 | PRMT2    | 7.31  | 7.45  | 0.25 | 0.21 | 3.3E-04 | 7.7E-04 |
| 3962165 | C22orf18 | 8.40  | 8.54  | 0.29 | 0.31 | 6.2E-03 | 6.7E-03 |
| 2786462 | PPP1R14B | 6.67  | 6.81  | 0.30 | 0.31 | 7.5E-03 | 7.8E-03 |
| 2454838 | C1orf48  | 8.88  | 9.02  | 0.32 | 0.34 | 6.0E-03 | 6.6E-03 |
| 2437645 | GON4L    | 7.57  | 7.72  | 0.29 | 0.32 | 2.7E-03 | 3.6E-03 |
| 3264004 | SHOC2    | 9.60  | 9.74  | 0.28 | 0.26 | 8.4E-04 | 1.5E-03 |
| 3015216 | COPS6    | 9.75  | 9.89  | 0.27 | 0.26 | 8.4E-04 | 1.5E-03 |
| 3787031 | C18orf25 | 6.61  | 6.75  | 0.42 | 0.39 | 2.7E-03 | 3.6E-03 |
| 3144760 | RBM12B   | 7.99  | 8.13  | 0.30 | 0.31 | 3.0E-03 | 3.9E-03 |
| 3431376 | ANKRD13  | 9.27  | 9.41  | 0.33 | 0.30 | 5.9E-03 | 6.5E-03 |
| 2639874 | UMPS     | 8.22  | 8.36  | 0.27 | 0.24 | 1.4E-04 | 4.1E-04 |

## AJHG, Volume 82

|         |          |       |       |      |      |         |         |
|---------|----------|-------|-------|------|------|---------|---------|
| 2632491 | NSUN3    | 7.33  | 7.48  | 0.29 | 0.31 | 4.6E-03 | 5.4E-03 |
| 3485074 | RFC3     | 9.18  | 9.32  | 0.23 | 0.24 | 2.7E-04 | 6.6E-04 |
| 2763805 | DHX15    | 9.80  | 9.94  | 0.24 | 0.22 | 2.6E-04 | 6.4E-04 |
| 2384956 | COG2     | 7.48  | 7.63  | 0.32 | 0.31 | 3.7E-03 | 4.5E-03 |
| 3453556 | PRKAG1   | 9.04  | 9.18  | 0.27 | 0.30 | 3.8E-03 | 4.6E-03 |
| 2401275 | HNRPR    | 10.25 | 10.39 | 0.28 | 0.26 | 7.4E-04 | 1.4E-03 |
| 3204202 | ARID3C   | 8.68  | 8.82  | 0.15 | 0.21 | 2.5E-05 | 1.1E-04 |
| 3387413 | FAM76B   | 7.50  | 7.65  | 0.29 | 0.27 | 9.0E-04 | 1.6E-03 |
| 3147726 | SLC25A32 | 9.25  | 9.39  | 0.20 | 0.20 | 3.3E-05 | 1.4E-04 |
| 2852237 | GOLPH3   | 9.25  | 9.39  | 0.27 | 0.24 | 5.1E-04 | 1.1E-03 |
| 2969810 | TRAF3IP2 | 8.61  | 8.75  | 0.25 | 0.25 | 1.4E-03 | 2.2E-03 |
| 2707764 | DCUN1D1  | 9.75  | 9.89  | 0.31 | 0.27 | 3.5E-03 | 4.4E-03 |
| 3483348 | C13orf12 | 10.32 | 10.46 | 0.23 | 0.23 | 5.1E-05 | 1.9E-04 |
| 3307795 | C10orf11 | 6.73  | 6.87  | 0.40 | 0.40 | 7.1E-03 | 7.5E-03 |
| 3263790 | CSPG6    | 7.83  | 7.98  | 0.34 | 0.28 | 6.9E-03 | 7.3E-03 |
| 2475710 | LYCAT    | 7.49  | 7.64  | 0.35 | 0.33 | 7.7E-03 | 7.9E-03 |
| 3755396 | CCDC49   | 7.14  | 7.28  | 0.30 | 0.29 | 2.1E-03 | 3.0E-03 |
| 3788220 | ME2      | 9.71  | 9.85  | 0.24 | 0.25 | 2.3E-04 | 5.9E-04 |
| 3760945 | MRPL10   | 8.19  | 8.34  | 0.26 | 0.26 | 9.5E-04 | 1.7E-03 |
| 3223872 | RAB14    | 8.61  | 8.75  | 0.32 | 0.32 | 2.7E-03 | 3.6E-03 |
| 3801411 | NPC1     | 8.31  | 8.45  | 0.38 | 0.35 | 7.5E-03 | 7.8E-03 |
| 2827525 | KDELC1   | 8.04  | 8.18  | 0.30 | 0.37 | 9.9E-03 | 9.6E-03 |
| 2434633 | ARNT     | 8.35  | 8.50  | 0.25 | 0.29 | 3.9E-03 | 4.7E-03 |
| 2388219 | EXO1     | 8.35  | 8.50  | 0.35 | 0.33 | 5.5E-03 | 6.2E-03 |
| 3739827 | C17orf25 | 8.91  | 9.06  | 0.32 | 0.26 | 2.1E-03 | 3.0E-03 |
| 3101385 | MTFR1    | 7.39  | 7.53  | 0.35 | 0.30 | 6.2E-03 | 6.7E-03 |
| 3423184 | ZDHHC17  | 6.92  | 7.07  | 0.33 | 0.33 | 3.5E-03 | 4.4E-03 |
| 2501697 | ACTR3    | 11.55 | 11.70 | 0.24 | 0.21 | 1.9E-04 | 5.1E-04 |
| 2948259 | LOC65255 | 7.97  | 8.12  | 0.27 | 0.26 | 6.4E-04 | 1.2E-03 |
| 3180263 | LOC65265 | 9.23  | 9.37  | 0.28 | 0.27 | 2.3E-03 | 3.2E-03 |
| 3850363 | KEAP1    | 8.36  | 8.51  | 0.23 | 0.25 | 2.3E-04 | 5.9E-04 |
| 3030562 | ZNF212   | 7.06  | 7.21  | 0.27 | 0.27 | 1.4E-03 | 2.2E-03 |
| 2751385 | CLCN3    | 7.81  | 7.95  | 0.29 | 0.32 | 3.1E-03 | 4.0E-03 |

## AJHG, Volume 82

|         |          |       |       |      |      |         |         |
|---------|----------|-------|-------|------|------|---------|---------|
| 3559497 | STRN3    | 6.99  | 7.13  | 0.37 | 0.35 | 7.9E-03 | 8.1E-03 |
| 3474228 | RAB35    | 9.02  | 9.17  | 0.24 | 0.25 | 4.6E-04 | 9.8E-04 |
| 3056044 | BAZ1B    | 8.64  | 8.78  | 0.22 | 0.21 | 1.1E-04 | 3.2E-04 |
| 2477980 | GEMIN6   | 7.92  | 8.06  | 0.31 | 0.27 | 7.0E-04 | 1.3E-03 |
| 3454223 | RACGAP1  | 8.84  | 8.98  | 0.25 | 0.22 | 1.6E-04 | 4.4E-04 |
| 3722554 | DHX8     | 8.30  | 8.45  | 0.19 | 0.25 | 2.1E-04 | 5.4E-04 |
| 2434892 | VPS72    | 8.61  | 8.76  | 0.31 | 0.27 | 3.4E-03 | 4.3E-03 |
| 3907652 | NCOA5    | 8.51  | 8.66  | 0.29 | 0.25 | 1.4E-03 | 2.2E-03 |
| 3462693 | KRR1     | 8.03  | 8.18  | 0.31 | 0.31 | 1.2E-03 | 2.0E-03 |
| 3910785 | AURKA    | 7.57  | 7.72  | 0.31 | 0.25 | 3.4E-04 | 7.8E-04 |
| 3470793 | KCTD10   | 8.13  | 8.27  | 0.28 | 0.27 | 2.0E-03 | 2.9E-03 |
| 3304624 | MARVELD2 | 9.21  | 9.35  | 0.29 | 0.27 | 1.9E-03 | 2.8E-03 |
| 3972093 | POLA     | 8.02  | 8.17  | 0.33 | 0.32 | 3.4E-03 | 4.3E-03 |
| 4017245 | RP13-383 | 7.00  | 7.14  | 0.32 | 0.30 | 2.6E-03 | 3.5E-03 |
| 3311342 | LOC39981 | 6.86  | 7.01  | 0.30 | 0.31 | 5.3E-04 | 1.1E-03 |
| 3471704 | BRAP     | 8.06  | 8.21  | 0.21 | 0.22 | 8.6E-05 | 2.8E-04 |
| 2454378 | SLC30A1  | 7.60  | 7.75  | 0.30 | 0.29 | 8.1E-03 | 8.3E-03 |
| 3892409 | LSM14B   | 7.20  | 7.35  | 0.25 | 0.22 | 6.7E-05 | 2.3E-04 |
| 2326496 | DHDDS    | 8.91  | 9.06  | 0.24 | 0.28 | 1.1E-03 | 1.8E-03 |
| 2691014 | GSK3B    | 9.63  | 9.78  | 0.32 | 0.31 | 7.0E-03 | 7.4E-03 |
| 3550392 | PAPOLA   | 9.68  | 9.83  | 0.31 | 0.27 | 1.2E-03 | 1.9E-03 |
| 3273484 | LARP5    | 8.05  | 8.20  | 0.31 | 0.38 | 6.2E-03 | 6.8E-03 |
| 2436401 | JTB      | 7.38  | 7.53  | 0.39 | 0.29 | 5.9E-03 | 6.5E-03 |
| 3766861 | POLG2    | 7.02  | 7.17  | 0.33 | 0.28 | 1.3E-03 | 2.1E-03 |
| 2403740 | SFRS4    | 10.05 | 10.20 | 0.18 | 0.19 | 1.4E-05 | 7.2E-05 |
| 2495555 | UNC50    | 7.11  | 7.26  | 0.27 | 0.31 | 2.8E-03 | 3.7E-03 |
| 3896524 | CGI-09   | 8.01  | 8.16  | 0.18 | 0.18 | 8.8E-07 | 9.4E-06 |
| 2779434 | DNAJB14  | 7.69  | 7.84  | 0.27 | 0.30 | 2.2E-03 | 3.1E-03 |
| 3779756 | LOC64618 | 8.93  | 9.08  | 0.21 | 0.18 | 9.1E-06 | 5.2E-05 |
| 3716664 | SUZ12P   | 8.08  | 8.23  | 0.31 | 0.34 | 1.0E-02 | 9.8E-03 |
| 3456592 | SMUG1    | 6.89  | 7.04  | 0.27 | 0.20 | 1.6E-04 | 4.3E-04 |
| 4052881 | LOC65382 | 8.11  | 8.26  | 0.31 | 0.33 | 2.5E-03 | 3.4E-03 |
| 3611126 | MEF2A    | 9.30  | 9.45  | 0.26 | 0.21 | 2.9E-04 | 7.0E-04 |

## AJHG, Volume 82

|         |          |       |       |      |      |         |         |
|---------|----------|-------|-------|------|------|---------|---------|
| 3343008 | TMEM126A | 7.05  | 7.20  | 0.38 | 0.33 | 9.8E-03 | 9.5E-03 |
| 3571904 | LOC64665 | 8.97  | 9.12  | 0.39 | 0.33 | 4.7E-03 | 5.4E-03 |
| 2845043 | TRIM41   | 6.48  | 6.63  | 0.17 | 0.18 | 4.0E-06 | 2.8E-05 |
| 2866045 | MGC33214 | 8.20  | 8.35  | 0.36 | 0.35 | 8.9E-03 | 8.9E-03 |
| 3260666 | HIF1AN   | 8.06  | 8.21  | 0.36 | 0.34 | 5.7E-03 | 6.3E-03 |
| 3764680 | TRIM37   | 7.30  | 7.45  | 0.28 | 0.31 | 2.3E-03 | 3.2E-03 |
| 2587520 | LOC64407 | 8.09  | 8.24  | 0.25 | 0.30 | 1.5E-03 | 2.3E-03 |
| 2534615 | SCLY     | 7.56  | 7.71  | 0.30 | 0.31 | 3.7E-03 | 4.5E-03 |
| 3815649 | CIRBP    | 10.25 | 10.40 | 0.23 | 0.31 | 1.4E-03 | 2.2E-03 |
| 3415969 | SP1      | 9.10  | 9.25  | 0.26 | 0.24 | 2.3E-04 | 5.9E-04 |
| 2720145 | LAP3     | 9.77  | 9.92  | 0.29 | 0.27 | 2.1E-03 | 3.0E-03 |
| 3916576 | GABPA    | 8.54  | 8.69  | 0.31 | 0.34 | 4.6E-03 | 5.4E-03 |
| 3291682 | JMJD1C   | 8.56  | 8.71  | 0.33 | 0.31 | 6.4E-03 | 6.9E-03 |
| 3310413 | ATE1     | 8.19  | 8.34  | 0.30 | 0.33 | 1.5E-03 | 2.4E-03 |
| 3887635 | NCOA3    | 10.44 | 10.59 | 0.23 | 0.24 | 3.6E-05 | 1.4E-04 |
| 3182019 | STX17    | 7.72  | 7.87  | 0.27 | 0.27 | 1.1E-03 | 1.9E-03 |
| 3133345 | SLC20A2  | 7.06  | 7.21  | 0.19 | 0.17 | 3.3E-06 | 2.4E-05 |
| 3906942 | SERINC3  | 9.75  | 9.90  | 0.31 | 0.23 | 5.8E-04 | 1.1E-03 |
| 2458289 | LBR      | 10.06 | 10.21 | 0.38 | 0.32 | 6.6E-03 | 7.1E-03 |
| 3639031 | PRC1     | 8.38  | 8.53  | 0.31 | 0.27 | 8.6E-04 | 1.5E-03 |
| 3764066 | LOC64731 | 8.42  | 8.57  | 0.29 | 0.30 | 2.5E-03 | 3.4E-03 |
| 2419046 | USP33    | 7.88  | 8.03  | 0.34 | 0.34 | 4.5E-03 | 5.3E-03 |
| 2766532 | ENST0000 | 7.29  | 7.44  | 0.29 | 0.35 | 7.1E-03 | 7.5E-03 |
| 2481308 | LOC12928 | 7.05  | 7.20  | 0.31 | 0.37 | 6.2E-03 | 6.7E-03 |
| 2910477 | FBXO9    | 7.19  | 7.34  | 0.39 | 0.31 | 4.4E-03 | 5.2E-03 |
| 2454444 | NEK2     | 7.66  | 7.81  | 0.23 | 0.22 | 7.9E-05 | 2.6E-04 |
| 3882681 | CHMP4B   | 7.35  | 7.50  | 0.23 | 0.26 | 2.7E-05 | 1.2E-04 |
| 2476116 | SLC30A6  | 8.09  | 8.24  | 0.32 | 0.31 | 2.2E-03 | 3.1E-03 |
| 3429460 | TXNRD1   | 8.61  | 8.76  | 0.33 | 0.34 | 6.3E-03 | 6.8E-03 |
| 3629494 | CLPX     | 8.67  | 8.82  | 0.33 | 0.29 | 2.9E-03 | 3.8E-03 |
| 3728776 | RAD51C   | 7.16  | 7.31  | 0.42 | 0.37 | 9.6E-03 | 9.4E-03 |
| 3005332 | RCP9     | 8.03  | 8.18  | 0.26 | 0.29 | 1.2E-03 | 2.0E-03 |
| 3182489 | RNF20    | 7.88  | 8.03  | 0.29 | 0.27 | 5.6E-04 | 1.1E-03 |

## AJHG, Volume 82

|         |          |       |       |      |      |         |         |
|---------|----------|-------|-------|------|------|---------|---------|
| 3941907 | EWSR1    | 8.88  | 9.03  | 0.32 | 0.27 | 1.5E-03 | 2.4E-03 |
| 3759305 | CCDC43   | 7.05  | 7.21  | 0.33 | 0.33 | 5.2E-03 | 5.9E-03 |
| 3185558 | PRPF4    | 8.57  | 8.72  | 0.27 | 0.24 | 7.7E-04 | 1.4E-03 |
| 3129588 | KIF13B   | 7.51  | 7.66  | 0.24 | 0.26 | 2.8E-04 | 6.7E-04 |
| 3540007 | MTHFD1   | 10.13 | 10.28 | 0.18 | 0.18 | 7.7E-07 | 8.5E-06 |
| 3453036 | ASB8     | 7.41  | 7.57  | 0.28 | 0.26 | 8.1E-04 | 1.5E-03 |
| 3282268 | ACBD5    | 7.75  | 7.91  | 0.22 | 0.24 | 3.3E-05 | 1.3E-04 |
| 3132333 | TM2D2    | 6.83  | 6.98  | 0.28 | 0.30 | 1.1E-03 | 1.8E-03 |
| 3422269 | RAB21    | 9.59  | 9.74  | 0.21 | 0.27 | 1.9E-04 | 5.1E-04 |
| 3764103 | SFRS1    | 10.89 | 11.05 | 0.22 | 0.23 | 4.4E-05 | 1.7E-04 |
| 3693083 | LOC15266 | 9.08  | 9.23  | 0.24 | 0.21 | 8.8E-06 | 5.0E-05 |
| 3693533 | FLJ43934 | 9.64  | 9.79  | 0.31 | 0.25 | 5.7E-04 | 1.1E-03 |
| 3888133 | CSE1L    | 9.32  | 9.47  | 0.34 | 0.29 | 2.3E-03 | 3.2E-03 |
| 3670725 | GAN      | 7.05  | 7.21  | 0.28 | 0.29 | 1.1E-03 | 1.8E-03 |
| 3918574 | IFNAR1   | 8.18  | 8.33  | 0.35 | 0.28 | 2.3E-03 | 3.2E-03 |
| 2664395 | HACL1    | 7.94  | 8.09  | 0.29 | 0.35 | 5.9E-03 | 6.5E-03 |
| 3417309 | PA2G4    | 11.52 | 11.67 | 0.29 | 0.34 | 3.4E-03 | 4.3E-03 |
| 2581548 | LOC64245 | 8.81  | 8.97  | 0.35 | 0.34 | 6.0E-03 | 6.6E-03 |
| 3623683 | GABPB2   | 8.75  | 8.91  | 0.28 | 0.26 | 1.3E-03 | 2.1E-03 |
| 2650066 | IL12A    | 6.55  | 6.70  | 0.37 | 0.36 | 8.4E-03 | 8.5E-03 |
| 3094245 | SPFH2    | 6.90  | 7.06  | 0.28 | 0.32 | 1.5E-03 | 2.3E-03 |
| 2986546 | PDCD2    | 8.06  | 8.22  | 0.30 | 0.27 | 6.2E-04 | 1.2E-03 |
| 3418551 | TSFM     | 7.29  | 7.45  | 0.30 | 0.28 | 1.5E-03 | 2.3E-03 |
| 3303652 | MRPL43   | 6.93  | 7.08  | 0.27 | 0.31 | 4.1E-03 | 5.0E-03 |
| 2921086 | CDC40    | 8.44  | 8.59  | 0.28 | 0.23 | 1.3E-04 | 3.8E-04 |
| 2449619 | ZBTB41   | 6.74  | 6.90  | 0.34 | 0.38 | 5.7E-03 | 6.4E-03 |
| 3793888 | LOC65394 | 6.74  | 6.89  | 0.31 | 0.30 | 1.5E-03 | 2.3E-03 |
| 2325251 | TCEB3    | 8.53  | 8.68  | 0.36 | 0.37 | 7.8E-03 | 8.1E-03 |
| 2759404 | GRPEL1   | 8.11  | 8.27  | 0.29 | 0.27 | 9.8E-04 | 1.7E-03 |
| 3405531 | DDX47    | 9.22  | 9.37  | 0.31 | 0.28 | 8.7E-04 | 1.6E-03 |
| 3990795 | RBMX2    | 7.86  | 8.01  | 0.19 | 0.20 | 9.1E-06 | 5.1E-05 |
| 3668898 | ZFP1     | 7.05  | 7.20  | 0.37 | 0.28 | 9.3E-03 | 9.2E-03 |
| 2419235 | FUBP1    | 9.55  | 9.70  | 0.28 | 0.22 | 3.9E-04 | 8.6E-04 |

## AJHG, Volume 82

|         |          |       |       |      |      |         |         |
|---------|----------|-------|-------|------|------|---------|---------|
| 2723710 | PGM2     | 8.41  | 8.56  | 0.30 | 0.28 | 1.3E-03 | 2.1E-03 |
| 2454935 | ANGEL2   | 7.47  | 7.62  | 0.28 | 0.29 | 1.2E-03 | 1.9E-03 |
| 3250168 | VPS26A   | 8.98  | 9.13  | 0.32 | 0.26 | 1.3E-03 | 2.1E-03 |
| 3256689 | PTEN     | 10.35 | 10.51 | 0.35 | 0.33 | 2.7E-03 | 3.7E-03 |
| 3097208 | UBE2V2   | 8.37  | 8.52  | 0.29 | 0.31 | 6.7E-04 | 1.3E-03 |
| 2378937 | DTL      | 8.91  | 9.07  | 0.33 | 0.32 | 2.5E-03 | 3.4E-03 |
| 3779314 | CHMP1B   | 8.65  | 8.80  | 0.19 | 0.25 | 1.3E-04 | 3.8E-04 |
| 3730941 | PSMC5    | 8.83  | 8.98  | 0.30 | 0.27 | 4.5E-04 | 9.7E-04 |
| 3471005 | GIT2     | 8.40  | 8.55  | 0.24 | 0.25 | 9.1E-05 | 2.9E-04 |
| 2737717 | NFKB1    | 9.85  | 10.00 | 0.27 | 0.29 | 8.1E-04 | 1.5E-03 |
| 2633587 | TBC1D23  | 6.94  | 7.10  | 0.36 | 0.37 | 7.9E-03 | 8.1E-03 |
| 3021123 | ING3     | 7.87  | 8.03  | 0.33 | 0.34 | 8.9E-03 | 8.9E-03 |
| 3451670 | PUS7L    | 7.53  | 7.69  | 0.40 | 0.40 | 7.6E-03 | 7.9E-03 |
| 3189110 | GAPVD1   | 8.00  | 8.16  | 0.24 | 0.26 | 1.0E-04 | 3.2E-04 |
| 3575103 | GALC     | 6.44  | 6.60  | 0.32 | 0.34 | 5.3E-03 | 6.1E-03 |
| 3150663 | TAF2     | 8.23  | 8.38  | 0.26 | 0.25 | 7.2E-05 | 2.4E-04 |
| 3911814 | C20orf45 | 9.24  | 9.39  | 0.24 | 0.29 | 3.3E-04 | 7.7E-04 |
| 2536183 | PPP1R7   | 8.57  | 8.73  | 0.23 | 0.25 | 2.6E-04 | 6.3E-04 |
| 3821727 | ZNF136   | 7.18  | 7.33  | 0.31 | 0.24 | 7.8E-04 | 1.4E-03 |
| 2407163 | SNIP1    | 7.27  | 7.42  | 0.20 | 0.19 | 1.8E-05 | 8.4E-05 |
| 2793137 | SH3RF1   | 7.59  | 7.75  | 0.35 | 0.30 | 6.0E-03 | 6.6E-03 |
| 3971329 | MBTPS2   | 7.01  | 7.17  | 0.35 | 0.28 | 9.6E-04 | 1.7E-03 |
| 3109191 | POLR2K   | 7.44  | 7.60  | 0.31 | 0.30 | 1.8E-03 | 2.7E-03 |
| 2338487 | FLJ10986 | 6.93  | 7.09  | 0.30 | 0.33 | 3.8E-03 | 4.7E-03 |
| 3523118 | RP11-151 | 6.44  | 6.60  | 0.20 | 0.25 | 1.0E-04 | 3.2E-04 |
| 3880191 | ZNF336   | 6.88  | 7.04  | 0.25 | 0.25 | 1.1E-04 | 3.3E-04 |
| 2668035 | DYNC1LI1 | 7.13  | 7.28  | 0.33 | 0.33 | 8.6E-03 | 8.7E-03 |
| 2426791 | CLCC1    | 7.36  | 7.52  | 0.36 | 0.39 | 3.5E-03 | 4.4E-03 |
| 3817501 | CHAF1A   | 7.51  | 7.67  | 0.25 | 0.23 | 6.2E-05 | 2.2E-04 |
| 2608419 | SETMAR   | 6.50  | 6.65  | 0.43 | 0.37 | 7.7E-03 | 8.0E-03 |
| 3430331 | RIC8B    | 6.88  | 7.04  | 0.28 | 0.24 | 1.4E-04 | 4.0E-04 |
| 3991650 | PHF6     | 8.50  | 8.66  | 0.36 | 0.31 | 3.5E-03 | 4.4E-03 |
| 3382972 | FTHL12   | 6.93  | 7.08  | 0.32 | 0.30 | 2.8E-03 | 3.7E-03 |

## AJHG, Volume 82

|         |          |      |       |      |      |         |         |
|---------|----------|------|-------|------|------|---------|---------|
| 3750939 | SDF2     | 7.98 | 8.13  | 0.30 | 0.25 | 4.1E-04 | 8.9E-04 |
| 2927873 | CCDC28A  | 7.24 | 7.40  | 0.30 | 0.34 | 3.8E-03 | 4.7E-03 |
| 2968054 | SEC63    | 9.65 | 9.81  | 0.30 | 0.26 | 4.6E-04 | 9.8E-04 |
| 3828887 | ZNF507   | 7.30 | 7.46  | 0.39 | 0.36 | 8.5E-03 | 8.6E-03 |
| 3224341 | PDCL     | 7.17 | 7.33  | 0.31 | 0.32 | 1.9E-03 | 2.8E-03 |
| 2711818 | LSG1     | 7.01 | 7.16  | 0.33 | 0.33 | 2.2E-03 | 3.1E-03 |
| 2704188 | PDCD10   | 6.76 | 6.92  | 0.34 | 0.29 | 1.0E-03 | 1.8E-03 |
| 2980812 | TFB1M    | 6.74 | 6.90  | 0.40 | 0.34 | 7.1E-03 | 7.5E-03 |
| 2892738 | PRPF4B   | 7.88 | 8.04  | 0.38 | 0.34 | 5.7E-03 | 6.4E-03 |
| 2458701 | ACBD3    | 8.71 | 8.87  | 0.24 | 0.25 | 1.3E-04 | 3.8E-04 |
| 2556302 | PELI1    | 9.13 | 9.29  | 0.32 | 0.33 | 3.1E-03 | 4.0E-03 |
| 3563687 | C14orf13 | 7.21 | 7.37  | 0.27 | 0.26 | 4.1E-04 | 9.1E-04 |
| 3289031 | LOC65228 | 8.87 | 9.03  | 0.29 | 0.31 | 1.5E-03 | 2.4E-03 |
| 2848233 | LOC13414 | 6.64 | 6.80  | 0.34 | 0.39 | 2.8E-03 | 3.7E-03 |
| 2613386 | RAB5A    | 8.77 | 8.93  | 0.36 | 0.36 | 7.5E-03 | 7.8E-03 |
| 3895075 | IDH3B    | 9.52 | 9.68  | 0.22 | 0.23 | 3.8E-05 | 1.5E-04 |
| 3510858 | FOXO1A   | 8.53 | 8.69  | 0.32 | 0.26 | 5.1E-04 | 1.1E-03 |
| 3630099 | FLJ20516 | 6.60 | 6.76  | 0.35 | 0.36 | 3.2E-03 | 4.1E-03 |
| 3989180 | MCTS1    | 7.38 | 7.54  | 0.29 | 0.27 | 5.0E-04 | 1.0E-03 |
| 2575161 | MGC4268  | 7.08 | 7.24  | 0.35 | 0.35 | 7.6E-03 | 7.9E-03 |
| 3872335 | DKFZp686 | 6.70 | 6.86  | 0.31 | 0.33 | 3.3E-03 | 4.2E-03 |
| 2658346 | OPA1     | 8.80 | 8.96  | 0.33 | 0.36 | 5.7E-03 | 6.3E-03 |
| 2565484 | LMAN2L   | 6.90 | 7.06  | 0.32 | 0.30 | 1.1E-03 | 1.8E-03 |
| 3537747 | PSMA3    | 9.63 | 9.79  | 0.27 | 0.34 | 1.2E-03 | 2.0E-03 |
| 2594569 | MGC39518 | 7.93 | 8.09  | 0.34 | 0.33 | 2.4E-03 | 3.3E-03 |
| 3387483 | MTMR2    | 8.74 | 8.90  | 0.28 | 0.27 | 4.1E-04 | 9.0E-04 |
| 3347549 | CUL5     | 7.08 | 7.24  | 0.33 | 0.34 | 2.7E-03 | 3.6E-03 |
| 3135452 | ATP6V1H  | 7.89 | 8.05  | 0.33 | 0.31 | 1.3E-03 | 2.1E-03 |
| 2785114 | PGRMC2   | 7.60 | 7.76  | 0.42 | 0.41 | 8.9E-03 | 8.9E-03 |
| 2773907 | SDAD1    | 9.22 | 9.38  | 0.40 | 0.33 | 8.7E-03 | 8.7E-03 |
| 3588069 | TMEM85   | 8.93 | 9.09  | 0.32 | 0.27 | 2.3E-03 | 3.2E-03 |
| 2450865 | CSRP1    | 8.36 | 8.52  | 0.29 | 0.36 | 3.0E-03 | 3.9E-03 |
| 3456630 | CBX5     | 9.95 | 10.11 | 0.31 | 0.32 | 3.8E-03 | 4.7E-03 |

AJHG, Volume 82

|         |          |       |       |      |      |         |         |
|---------|----------|-------|-------|------|------|---------|---------|
| 3178611 | SECISBP2 | 7.69  | 7.85  | 0.38 | 0.33 | 1.8E-03 | 2.7E-03 |
| 2853768 | NUP155   | 8.56  | 8.72  | 0.28 | 0.28 | 3.7E-04 | 8.3E-04 |
| 3589212 | FAM98B   | 6.47  | 6.63  | 0.37 | 0.34 | 3.4E-03 | 4.3E-03 |
| 3441011 | PARP11   | 6.68  | 6.84  | 0.32 | 0.33 | 2.6E-03 | 3.5E-03 |
| 2321942 | DDI2     | 8.25  | 8.41  | 0.33 | 0.31 | 1.3E-03 | 2.1E-03 |
| 3332938 | C11orf66 | 8.91  | 9.07  | 0.24 | 0.25 | 1.1E-04 | 3.4E-04 |
| 3414512 | LARP4    | 8.65  | 8.81  | 0.23 | 0.25 | 1.1E-04 | 3.4E-04 |
| 3081624 | LMBR1    | 8.54  | 8.70  | 0.32 | 0.34 | 2.7E-03 | 3.6E-03 |
| 3593770 | AP4E1    | 7.03  | 7.19  | 0.30 | 0.27 | 4.0E-04 | 8.9E-04 |
| 3996815 | VBP1     | 7.82  | 7.99  | 0.29 | 0.26 | 3.2E-04 | 7.4E-04 |
| 2978026 | FBXO30   | 7.72  | 7.88  | 0.28 | 0.28 | 6.0E-04 | 1.2E-03 |
| 3809671 | NARS     | 7.01  | 7.18  | 0.36 | 0.38 | 2.9E-03 | 3.8E-03 |
| 4015838 | ARMCX6   | 8.05  | 8.21  | 0.18 | 0.20 | 1.5E-06 | 1.4E-05 |
| 3393834 | C11orf60 | 6.64  | 6.80  | 0.29 | 0.30 | 3.4E-04 | 7.8E-04 |
| 3504791 | EFHA1    | 7.54  | 7.70  | 0.41 | 0.37 | 8.7E-03 | 8.7E-03 |
| 2999485 | STK17A   | 9.65  | 9.81  | 0.39 | 0.38 | 9.7E-03 | 9.4E-03 |
| 2712958 | WDR53    | 6.86  | 7.02  | 0.25 | 0.30 | 5.6E-04 | 1.1E-03 |
| 3436544 | BRI3BP   | 9.17  | 9.34  | 0.23 | 0.23 | 6.0E-05 | 2.1E-04 |
| 2773023 | ANKRD17  | 8.82  | 8.98  | 0.28 | 0.28 | 2.8E-04 | 6.8E-04 |
| 3659931 | PAPD5    | 7.85  | 8.01  | 0.41 | 0.39 | 7.2E-03 | 7.6E-03 |
| 3378790 | PPP1CA   | 10.68 | 10.85 | 0.29 | 0.25 | 3.0E-04 | 7.1E-04 |
| 3325768 | QSER1    | 6.63  | 6.80  | 0.40 | 0.38 | 9.5E-03 | 9.3E-03 |
| 3598165 | PLEKHQ1  | 8.09  | 8.26  | 0.24 | 0.31 | 8.4E-04 | 1.5E-03 |
| 3603199 | IDH3A    | 10.48 | 10.64 | 0.21 | 0.21 | 7.5E-06 | 4.4E-05 |
| 2595443 | WDR12    | 8.53  | 8.69  | 0.33 | 0.31 | 3.4E-03 | 4.3E-03 |
| 2588827 | NFE2L2   | 8.63  | 8.80  | 0.30 | 0.34 | 1.9E-03 | 2.8E-03 |
| 3517594 | KIAA1008 | 8.35  | 8.51  | 0.37 | 0.31 | 3.0E-03 | 3.9E-03 |
| 3199431 | ZDHHC21  | 7.80  | 7.96  | 0.38 | 0.36 | 5.0E-03 | 5.8E-03 |
| 3072276 | LOC64646 | 8.41  | 8.57  | 0.26 | 0.32 | 1.6E-04 | 4.5E-04 |
| 3989089 | ZBTB33   | 8.45  | 8.62  | 0.28 | 0.28 | 2.9E-04 | 7.0E-04 |
| 2724671 | RHOH     | 9.62  | 9.79  | 0.33 | 0.36 | 4.9E-03 | 5.6E-03 |
| 3188993 | ARPC5L   | 8.17  | 8.34  | 0.30 | 0.32 | 1.7E-03 | 2.5E-03 |
| 3408018 | LOC64510 | 8.39  | 8.56  | 0.37 | 0.35 | 2.1E-03 | 3.0E-03 |



## AJHG, Volume 82

|         |          |      |      |      |      |         |         |
|---------|----------|------|------|------|------|---------|---------|
| 3486883 | NARG1L   | 6.46 | 6.62 | 0.37 | 0.31 | 2.4E-03 | 3.3E-03 |
| 3133465 | THAP1    | 6.78 | 6.94 | 0.22 | 0.28 | 1.1E-04 | 3.4E-04 |
| 2878246 | PFDN1    | 7.04 | 7.21 | 0.35 | 0.36 | 6.1E-03 | 6.7E-03 |
| 2366132 | TIPRL    | 7.68 | 7.85 | 0.36 | 0.38 | 8.0E-03 | 8.2E-03 |
| 3807569 | LOC64860 | 7.89 | 8.05 | 0.38 | 0.38 | 4.0E-03 | 4.8E-03 |
| 3044129 | C7orf24  | 8.06 | 8.22 | 0.32 | 0.32 | 1.6E-03 | 2.4E-03 |
| 2619344 | NKTR     | 7.59 | 7.75 | 0.36 | 0.38 | 6.1E-03 | 6.6E-03 |
| 3960782 | JOSD1    | 8.40 | 8.57 | 0.28 | 0.34 | 1.8E-03 | 2.6E-03 |
| 2900423 | ZNF187   | 6.58 | 6.74 | 0.38 | 0.33 | 5.3E-03 | 6.0E-03 |
| 2655773 | POLR2H   | 9.50 | 9.66 | 0.29 | 0.29 | 3.4E-04 | 7.8E-04 |
| 2437329 | CLK2P    | 8.91 | 9.07 | 0.24 | 0.28 | 3.0E-04 | 7.2E-04 |
| 3726992 | UTP18    | 7.29 | 7.46 | 0.39 | 0.41 | 6.9E-03 | 7.4E-03 |
| 2780999 | PAPSS1   | 8.41 | 8.58 | 0.36 | 0.29 | 1.9E-03 | 2.7E-03 |
| 3398241 | BTBD15   | 8.20 | 8.37 | 0.34 | 0.35 | 3.0E-03 | 4.0E-03 |
| 2440549 | ARHGAP30 | 8.96 | 9.13 | 0.19 | 0.23 | 1.8E-05 | 8.4E-05 |
| 3716893 | C17orf41 | 7.32 | 7.49 | 0.36 | 0.37 | 4.1E-03 | 4.9E-03 |
| 3665603 | CTCF     | 8.92 | 9.09 | 0.22 | 0.21 | 7.7E-06 | 4.5E-05 |
| 2523635 | LOC44258 | 7.03 | 7.19 | 0.30 | 0.32 | 4.0E-04 | 8.9E-04 |
| 3060051 | C7orf23  | 9.66 | 9.83 | 0.39 | 0.35 | 3.1E-03 | 4.0E-03 |
| 2461891 | B3GALNT2 | 7.67 | 7.84 | 0.19 | 0.21 | 4.3E-06 | 3.0E-05 |
| 3465791 | UBE2N    | 8.89 | 9.05 | 0.32 | 0.37 | 3.4E-03 | 4.3E-03 |
| 3151534 | ATAD2    | 7.75 | 7.91 | 0.36 | 0.34 | 3.2E-03 | 4.1E-03 |
| 2979679 | ZBTB2    | 7.43 | 7.59 | 0.38 | 0.39 | 9.9E-03 | 9.6E-03 |
| 2500615 | TMEM87B  | 8.36 | 8.52 | 0.35 | 0.33 | 2.9E-03 | 3.9E-03 |
| 3592484 | PLDN     | 8.86 | 9.02 | 0.19 | 0.25 | 1.4E-05 | 7.2E-05 |
| 3446796 | RECQL    | 8.45 | 8.61 | 0.32 | 0.34 | 2.1E-03 | 3.0E-03 |
| 3308864 | RAB11FIP | 7.31 | 7.48 | 0.28 | 0.35 | 1.7E-03 | 2.6E-03 |
| 3250019 | DDX50    | 8.08 | 8.24 | 0.32 | 0.30 | 5.1E-04 | 1.1E-03 |
| 3730211 | METTL2A  | 7.05 | 7.22 | 0.37 | 0.37 | 3.4E-03 | 4.3E-03 |
| 2980241 | FBXO5    | 8.53 | 8.70 | 0.36 | 0.30 | 1.6E-03 | 2.4E-03 |
| 2327603 | GMEB1    | 7.81 | 7.98 | 0.26 | 0.27 | 4.0E-04 | 8.9E-04 |
| 3952718 | UFD1L    | 8.92 | 9.09 | 0.30 | 0.29 | 4.0E-04 | 8.9E-04 |
| 2438504 | MRPL24   | 8.93 | 9.09 | 0.28 | 0.31 | 8.7E-04 | 1.6E-03 |

## AJHG, Volume 82

|         |          |       |       |      |      |         |         |
|---------|----------|-------|-------|------|------|---------|---------|
| 2676901 | ACTR8    | 7.71  | 7.88  | 0.32 | 0.32 | 2.3E-03 | 3.2E-03 |
| 2693081 | SLC12A8  | 8.41  | 8.58  | 0.33 | 0.29 | 1.6E-03 | 2.4E-03 |
| 2480619 | SOCS5    | 7.75  | 7.92  | 0.28 | 0.26 | 1.1E-04 | 3.4E-04 |
| 4012204 | HDAC8    | 7.43  | 7.59  | 0.31 | 0.29 | 5.4E-04 | 1.1E-03 |
| 3308619 | PDZD8    | 8.63  | 8.80  | 0.32 | 0.26 | 5.5E-04 | 1.1E-03 |
| 3403567 | NECAP1   | 7.06  | 7.23  | 0.32 | 0.36 | 2.2E-03 | 3.1E-03 |
| 3225348 | PPP6C    | 9.42  | 9.59  | 0.22 | 0.20 | 3.2E-06 | 2.4E-05 |
| 2761734 | FBXL5    | 8.38  | 8.55  | 0.32 | 0.29 | 5.3E-04 | 1.1E-03 |
| 2559807 | MOBK1B   | 10.42 | 10.59 | 0.34 | 0.30 | 2.1E-03 | 3.0E-03 |
| 3402736 | FLJ35282 | 7.84  | 8.01  | 0.36 | 0.33 | 1.8E-03 | 2.7E-03 |
| 3457201 | DNAJC14  | 7.56  | 7.73  | 0.39 | 0.36 | 3.4E-03 | 4.3E-03 |
| 3722384 | LOC64414 | 6.77  | 6.94  | 0.32 | 0.30 | 5.2E-04 | 1.1E-03 |
| 3242425 | C10orf9  | 8.25  | 8.41  | 0.26 | 0.24 | 4.5E-05 | 1.7E-04 |
| 2620410 | EXOSC7   | 6.98  | 7.14  | 0.32 | 0.29 | 8.7E-04 | 1.6E-03 |
| 3508330 | HSPH1    | 9.14  | 9.31  | 0.32 | 0.40 | 5.0E-03 | 5.7E-03 |
| 3257559 | RPP30    | 8.29  | 8.46  | 0.31 | 0.30 | 5.1E-04 | 1.1E-03 |
| 3418303 | PIP5K2C  | 8.06  | 8.22  | 0.25 | 0.26 | 2.4E-04 | 6.0E-04 |
| 3537557 | C14orf10 | 7.57  | 7.74  | 0.45 | 0.44 | 9.8E-03 | 9.5E-03 |
| 3106310 | DECR1    | 8.46  | 8.63  | 0.36 | 0.38 | 4.4E-03 | 5.2E-03 |
| 3613300 | NIPA2    | 8.77  | 8.94  | 0.22 | 0.28 | 1.4E-04 | 4.0E-04 |
| 3432267 | TRAFD1   | 9.22  | 9.39  | 0.38 | 0.35 | 4.5E-03 | 5.3E-03 |
| 3625234 | LOC28428 | 8.78  | 8.95  | 0.43 | 0.36 | 9.9E-03 | 9.6E-03 |
| 2456204 | GPATC2   | 6.80  | 6.97  | 0.36 | 0.35 | 2.8E-03 | 3.7E-03 |
| 3391029 | PPP2R1B  | 8.61  | 8.78  | 0.29 | 0.30 | 5.8E-04 | 1.1E-03 |
| 3751463 | NUFIP2   | 8.61  | 8.78  | 0.27 | 0.25 | 1.9E-04 | 5.1E-04 |
| 3819968 | LOC64739 | 6.31  | 6.48  | 0.29 | 0.24 | 1.4E-04 | 4.0E-04 |
| 2799184 | NDUFS6   | 9.46  | 9.63  | 0.34 | 0.29 | 5.3E-04 | 1.1E-03 |
| 3180957 | HABP4    | 7.07  | 7.24  | 0.26 | 0.25 | 1.4E-04 | 4.0E-04 |
| 2349043 | SLC30A7  | 8.53  | 8.70  | 0.36 | 0.33 | 2.3E-03 | 3.2E-03 |
| 2430370 | GDAP2    | 7.55  | 7.72  | 0.37 | 0.38 | 3.3E-03 | 4.2E-03 |
| 3430552 | LOC64476 | 9.08  | 9.25  | 0.18 | 0.18 | 3.1E-07 | 4.3E-06 |
| 3591838 | CASC4    | 8.31  | 8.48  | 0.29 | 0.27 | 3.3E-04 | 7.7E-04 |
| 3756193 | TOP2A    | 9.08  | 9.25  | 0.38 | 0.33 | 2.2E-03 | 3.1E-03 |

AJHG, Volume 82

|         |          |       |       |      |      |         |         |
|---------|----------|-------|-------|------|------|---------|---------|
| 3970833 | PDHA1    | 9.08  | 9.25  | 0.21 | 0.18 | 1.2E-06 | 1.2E-05 |
| 3372368 | MTCH2    | 10.40 | 10.57 | 0.24 | 0.24 | 5.3E-05 | 1.9E-04 |
| 2559967 | SLC4A5   | 8.16  | 8.33  | 0.28 | 0.33 | 1.2E-03 | 2.0E-03 |
| 3373724 | SSRP1    | 9.90  | 10.07 | 0.17 | 0.18 | 1.0E-07 | 1.9E-06 |
| 2890148 | HNRPH1   | 11.25 | 11.42 | 0.22 | 0.23 | 5.0E-06 | 3.4E-05 |
| 2526980 | XRCC5    | 10.60 | 10.77 | 0.26 | 0.20 | 1.2E-05 | 6.4E-05 |
| 3809621 | FECH     | 7.26  | 7.43  | 0.29 | 0.26 | 3.1E-04 | 7.3E-04 |
| 3045739 | HERPUD2  | 8.64  | 8.81  | 0.31 | 0.30 | 1.0E-03 | 1.8E-03 |
| 2650199 | SMC4L1   | 8.63  | 8.81  | 0.36 | 0.34 | 2.3E-03 | 3.2E-03 |
| 3339230 | RNF121   | 8.57  | 8.74  | 0.31 | 0.28 | 2.5E-04 | 6.2E-04 |
| 3515965 | DIAPH3   | 6.93  | 7.10  | 0.37 | 0.32 | 1.7E-03 | 2.6E-03 |
| 4024160 | ATP11C   | 8.07  | 8.24  | 0.33 | 0.33 | 1.7E-03 | 2.6E-03 |
| 3212728 | AGTPBP1  | 7.55  | 7.72  | 0.39 | 0.36 | 7.0E-03 | 7.4E-03 |
| 2724338 | LIAS     | 6.64  | 6.81  | 0.38 | 0.35 | 2.3E-03 | 3.2E-03 |
| 2367793 | KLHL20   | 6.85  | 7.02  | 0.30 | 0.29 | 3.5E-04 | 7.9E-04 |
| 2531377 | SP100    | 8.37  | 8.54  | 0.36 | 0.32 | 7.2E-04 | 1.4E-03 |
| 3010030 | RSBN1L   | 7.78  | 7.95  | 0.29 | 0.28 | 2.7E-04 | 6.6E-04 |
| 2629693 | PPP4R2   | 9.25  | 9.43  | 0.29 | 0.36 | 1.8E-03 | 2.6E-03 |
| 3569200 | ATP6V1D  | 7.22  | 7.39  | 0.44 | 0.37 | 6.1E-03 | 6.7E-03 |
| 2370991 | DHX9     | 9.46  | 9.63  | 0.33 | 0.30 | 8.5E-04 | 1.5E-03 |
| 3500772 | ABHD13   | 7.67  | 7.84  | 0.24 | 0.27 | 8.8E-05 | 2.8E-04 |
| 2562115 | LSM3     | 7.62  | 7.79  | 0.33 | 0.34 | 1.0E-03 | 1.8E-03 |
| 2925510 | L3MBTL3  | 6.85  | 7.02  | 0.44 | 0.40 | 9.7E-03 | 9.4E-03 |
| 3689880 | SHCBP1   | 8.63  | 8.80  | 0.36 | 0.29 | 1.4E-03 | 2.3E-03 |
| 2593352 | GTF3C3   | 8.34  | 8.51  | 0.32 | 0.30 | 1.2E-03 | 2.0E-03 |
| 3611049 | HSP90B1  | 7.68  | 7.85  | 0.39 | 0.38 | 5.7E-03 | 6.3E-03 |
| 3623865 | SPPL2A   | 9.14  | 9.31  | 0.26 | 0.29 | 3.1E-04 | 7.3E-04 |
| 2757720 | POLN     | 6.93  | 7.10  | 0.34 | 0.36 | 8.3E-04 | 1.5E-03 |
| 3063083 | SMURF1   | 7.14  | 7.31  | 0.31 | 0.35 | 2.3E-03 | 3.2E-03 |
| 2708610 | MAGEF1   | 8.14  | 8.31  | 0.36 | 0.35 | 4.0E-03 | 4.8E-03 |
| 3811497 | VPS4B    | 8.24  | 8.41  | 0.24 | 0.22 | 1.3E-05 | 6.7E-05 |
| 3911177 | ZBP1     | 7.00  | 7.17  | 0.35 | 0.34 | 2.8E-03 | 3.7E-03 |
| 3145020 | KIAA1429 | 8.16  | 8.33  | 0.28 | 0.23 | 4.0E-05 | 1.5E-04 |

## AJHG, Volume 82

|         |          |       |       |      |      |         |         |
|---------|----------|-------|-------|------|------|---------|---------|
| 3455973 | SPRYD3   | 8.07  | 8.24  | 0.25 | 0.30 | 2.9E-04 | 7.0E-04 |
| 3882069 | MAPRE1   | 10.27 | 10.44 | 0.32 | 0.27 | 3.1E-04 | 7.3E-04 |
| 2880905 | CSNK1A1  | 8.74  | 8.91  | 0.33 | 0.33 | 2.0E-03 | 2.9E-03 |
| 4005627 | CXorf38  | 8.05  | 8.22  | 0.40 | 0.45 | 9.8E-03 | 9.5E-03 |
| 3627076 | BNIP2    | 8.88  | 9.06  | 0.31 | 0.27 | 2.4E-04 | 6.1E-04 |
| 3666033 | NFATC3   | 8.07  | 8.24  | 0.25 | 0.27 | 9.0E-05 | 2.8E-04 |
| 2519140 | LEREPO4  | 8.76  | 8.93  | 0.37 | 0.35 | 3.6E-03 | 4.5E-03 |
| 3988740 | PGRMC1   | 9.08  | 9.26  | 0.28 | 0.25 | 1.5E-04 | 4.3E-04 |
| 3217487 | ALG2     | 8.90  | 9.07  | 0.25 | 0.28 | 7.1E-05 | 2.4E-04 |
| 3565524 | GCH1     | 8.13  | 8.31  | 0.44 | 0.35 | 7.2E-03 | 7.6E-03 |
| 3890870 | LOC64422 | 8.16  | 8.33  | 0.25 | 0.22 | 3.4E-05 | 1.4E-04 |
| 2372924 | TROVE2   | 8.83  | 9.01  | 0.35 | 0.37 | 2.7E-03 | 3.6E-03 |
| 2367287 | KIAA0859 | 7.72  | 7.90  | 0.28 | 0.29 | 6.3E-04 | 1.2E-03 |
| 3984779 | HNRPH2   | 8.81  | 8.98  | 0.32 | 0.33 | 2.5E-03 | 3.4E-03 |
| 3217736 | TXNDC4   | 9.83  | 10.01 | 0.33 | 0.30 | 7.2E-04 | 1.4E-03 |
| 3620515 | LOC64292 | 8.32  | 8.49  | 0.24 | 0.27 | 1.7E-04 | 4.6E-04 |
| 3740171 | CRK      | 8.12  | 8.29  | 0.29 | 0.28 | 4.2E-04 | 9.1E-04 |
| 3435946 | GTF2H3   | 7.76  | 7.94  | 0.47 | 0.34 | 9.7E-03 | 9.5E-03 |
| 2464484 | LOC28470 | 7.46  | 7.63  | 0.29 | 0.38 | 4.1E-03 | 4.9E-03 |
| 3250093 | KIAA1279 | 7.53  | 7.71  | 0.37 | 0.33 | 3.2E-03 | 4.1E-03 |
| 3620590 | ZFP106   | 8.74  | 8.91  | 0.27 | 0.22 | 1.3E-05 | 6.7E-05 |
| 3758317 | BRCA1    | 7.49  | 7.66  | 0.35 | 0.37 | 3.0E-03 | 3.9E-03 |
| 3037142 | LOC39271 | 8.15  | 8.32  | 0.34 | 0.35 | 8.3E-04 | 1.5E-03 |
| 3304746 | USMG5    | 10.18 | 10.36 | 0.30 | 0.33 | 1.3E-03 | 2.1E-03 |
| 3348891 | C11orf57 | 7.24  | 7.42  | 0.30 | 0.28 | 2.5E-04 | 6.2E-04 |
| 2827156 | RNUXA    | 7.41  | 7.59  | 0.35 | 0.34 | 2.2E-03 | 3.1E-03 |
| 3843525 | ZNF587   | 6.51  | 6.69  | 0.35 | 0.35 | 1.8E-03 | 2.7E-03 |
| 2676579 | RFT1     | 7.98  | 8.15  | 0.41 | 0.38 | 4.4E-03 | 5.2E-03 |
| 3626555 | HSP90AB4 | 8.86  | 9.03  | 0.32 | 0.28 | 4.6E-04 | 9.8E-04 |
| 2854737 | PRKAA1   | 8.50  | 8.67  | 0.30 | 0.24 | 1.6E-04 | 4.5E-04 |
| 2842570 | UBXD8    | 8.92  | 9.09  | 0.33 | 0.30 | 3.2E-04 | 7.4E-04 |
| 2508016 | LOC33974 | 7.59  | 7.77  | 0.45 | 0.46 | 9.6E-03 | 9.4E-03 |
| 2594627 | MGC39518 | 7.35  | 7.52  | 0.29 | 0.28 | 3.3E-04 | 7.7E-04 |

## AJHG, Volume 82

|         |          |       |       |      |      |         |         |
|---------|----------|-------|-------|------|------|---------|---------|
| 2407439 | SF3A3    | 9.11  | 9.29  | 0.30 | 0.25 | 1.5E-04 | 4.1E-04 |
| 3563459 | MARVELD2 | 7.32  | 7.50  | 0.32 | 0.30 | 6.5E-04 | 1.2E-03 |
| 2697792 | COPB2    | 9.19  | 9.36  | 0.33 | 0.27 | 4.2E-04 | 9.1E-04 |
| 2571217 | ZC3H8    | 7.35  | 7.52  | 0.31 | 0.31 | 8.9E-04 | 1.6E-03 |
| 2502300 | LOC38902 | 8.31  | 8.48  | 0.38 | 0.33 | 1.7E-03 | 2.6E-03 |
| 2485257 | UGP2     | 8.44  | 8.62  | 0.35 | 0.31 | 2.2E-03 | 3.1E-03 |
| 3513953 | C13orf1  | 8.06  | 8.23  | 0.25 | 0.26 | 2.4E-05 | 1.1E-04 |
| 2346023 | LRRC8D   | 8.95  | 9.12  | 0.34 | 0.29 | 4.7E-04 | 1.0E-03 |
| 2943434 | ATXN1    | 7.54  | 7.72  | 0.46 | 0.36 | 3.1E-03 | 4.1E-03 |
| 3506153 | LOC64648 | 7.59  | 7.77  | 0.32 | 0.25 | 5.6E-04 | 1.1E-03 |
| 3790259 | MALT1    | 9.19  | 9.36  | 0.30 | 0.22 | 6.9E-05 | 2.3E-04 |
| 3391769 | ZW10     | 7.42  | 7.60  | 0.33 | 0.30 | 2.1E-04 | 5.5E-04 |
| 3342525 | PCF11    | 7.99  | 8.17  | 0.35 | 0.31 | 4.3E-04 | 9.2E-04 |
| 3087501 | ZDHHC2   | 6.81  | 6.98  | 0.42 | 0.33 | 7.1E-03 | 7.5E-03 |
| 3228007 | SETX     | 9.14  | 9.31  | 0.29 | 0.24 | 8.6E-05 | 2.7E-04 |
| 3988365 | WDR44    | 7.04  | 7.22  | 0.35 | 0.33 | 1.6E-03 | 2.4E-03 |
| 2654023 | ACTL6A   | 7.64  | 7.82  | 0.41 | 0.37 | 4.3E-03 | 5.1E-03 |
| 2877141 | HNRPA0   | 9.65  | 9.83  | 0.31 | 0.34 | 2.0E-03 | 2.9E-03 |
| 3752437 | UTP6     | 8.75  | 8.92  | 0.29 | 0.29 | 3.9E-04 | 8.6E-04 |
| 3434823 | RNF34    | 8.93  | 9.10  | 0.32 | 0.31 | 8.7E-04 | 1.6E-03 |
| 3543481 | PSEN1    | 8.83  | 9.01  | 0.25 | 0.25 | 4.1E-05 | 1.6E-04 |
| 2989537 | FLJ43276 | 10.27 | 10.44 | 0.44 | 0.39 | 1.5E-03 | 2.3E-03 |
| 3624607 | MYO5A    | 7.78  | 7.96  | 0.36 | 0.36 | 1.5E-03 | 2.3E-03 |
| 3860208 | ALKBH6   | 8.11  | 8.28  | 0.29 | 0.29 | 1.4E-04 | 4.1E-04 |
| 3130823 | C8orf41  | 7.99  | 8.17  | 0.27 | 0.25 | 2.9E-05 | 1.2E-04 |
| 3891006 | STX16    | 8.06  | 8.23  | 0.28 | 0.30 | 2.6E-04 | 6.4E-04 |
| 2735459 | HERC3    | 6.90  | 7.07  | 0.36 | 0.31 | 1.1E-03 | 1.9E-03 |
| 2786578 | NDUFC1   | 9.70  | 9.88  | 0.38 | 0.35 | 2.3E-03 | 3.2E-03 |
| 3421897 | CNOT2    | 8.50  | 8.68  | 0.31 | 0.31 | 4.7E-04 | 1.0E-03 |
| 2385696 | C1orf57  | 7.47  | 7.65  | 0.36 | 0.31 | 3.0E-03 | 3.9E-03 |
| 2421753 | GTF2B    | 7.67  | 7.84  | 0.31 | 0.30 | 7.3E-04 | 1.4E-03 |
| 3599432 | FEM1B    | 8.54  | 8.72  | 0.29 | 0.32 | 5.5E-04 | 1.1E-03 |
| 3969455 | OFD1     | 7.38  | 7.56  | 0.43 | 0.44 | 9.9E-03 | 9.5E-03 |

## AJHG, Volume 82

|         |          |      |       |      |      |         |         |
|---------|----------|------|-------|------|------|---------|---------|
| 3380080 | ORAOV1   | 6.51 | 6.69  | 0.24 | 0.24 | 1.7E-05 | 8.2E-05 |
| 2728448 | POLR2B   | 9.91 | 10.09 | 0.31 | 0.28 | 4.9E-04 | 1.0E-03 |
| 3107661 | INTS8    | 8.00 | 8.18  | 0.40 | 0.33 | 2.6E-03 | 3.5E-03 |
| 2511432 | GPD2     | 7.80 | 7.98  | 0.40 | 0.43 | 8.4E-03 | 8.5E-03 |
| 3217807 | TEX10    | 8.16 | 8.34  | 0.37 | 0.34 | 2.0E-03 | 2.9E-03 |
| 3434374 | 15E1.2   | 8.63 | 8.80  | 0.27 | 0.23 | 8.8E-06 | 5.0E-05 |
| 3590341 | CHP      | 9.96 | 10.13 | 0.19 | 0.18 | 4.3E-07 | 5.6E-06 |
| 3319685 | C11orf17 | 7.04 | 7.22  | 0.35 | 0.37 | 3.6E-03 | 4.5E-03 |
| 3541073 | MPP5     | 6.68 | 6.85  | 0.44 | 0.38 | 8.4E-03 | 8.5E-03 |
| 3934695 | PTTG1IP  | 9.28 | 9.46  | 0.27 | 0.26 | 2.6E-05 | 1.1E-04 |
| 2366028 | IQWD1    | 8.08 | 8.26  | 0.31 | 0.31 | 5.3E-04 | 1.1E-03 |
| 2484970 | EHBP1    | 6.85 | 7.03  | 0.38 | 0.41 | 8.4E-03 | 8.5E-03 |
| 3444958 | DUSP16   | 8.70 | 8.88  | 0.42 | 0.39 | 3.0E-03 | 3.9E-03 |
| 3660213 | CYLD     | 8.69 | 8.87  | 0.32 | 0.29 | 2.3E-04 | 5.9E-04 |
| 3912861 | PSMA7    | 9.53 | 9.71  | 0.23 | 0.26 | 2.5E-05 | 1.1E-04 |
| 3167325 | UBAP1    | 8.60 | 8.78  | 0.22 | 0.22 | 2.2E-06 | 1.8E-05 |
| 3503164 | CDC16    | 8.27 | 8.45  | 0.33 | 0.27 | 3.8E-04 | 8.6E-04 |
| 3884324 | CTNBL1   | 7.90 | 8.08  | 0.14 | 0.16 | 2.3E-10 | 1.9E-08 |
| 2448232 | PDC      | 8.29 | 8.47  | 0.37 | 0.36 | 5.3E-03 | 6.0E-03 |
| 3733999 | C17orf80 | 6.81 | 6.99  | 0.26 | 0.27 | 2.6E-05 | 1.1E-04 |
| 3091699 | PNOC     | 8.43 | 8.61  | 0.32 | 0.27 | 1.7E-04 | 4.7E-04 |
| 2465182 | TFB2M    | 7.74 | 7.92  | 0.35 | 0.30 | 1.1E-03 | 1.9E-03 |
| 3444195 | FLJ10292 | 8.29 | 8.47  | 0.29 | 0.33 | 4.9E-04 | 1.0E-03 |
| 3402684 | ENST0000 | 6.54 | 6.72  | 0.37 | 0.47 | 6.3E-03 | 6.8E-03 |
| 3250863 | SGPL1    | 8.07 | 8.25  | 0.22 | 0.24 | 1.1E-05 | 6.1E-05 |
| 3412296 | IRAK4    | 7.19 | 7.37  | 0.35 | 0.31 | 4.4E-04 | 9.5E-04 |
| 3699707 | ADAT1    | 7.78 | 7.96  | 0.27 | 0.24 | 2.9E-05 | 1.2E-04 |
| 2520533 | OBFC2A   | 8.43 | 8.61  | 0.40 | 0.30 | 3.3E-03 | 4.2E-03 |
| 2620685 | SACM1L   | 7.97 | 8.15  | 0.41 | 0.35 | 3.9E-03 | 4.8E-03 |
| 2622359 | RBM6     | 8.31 | 8.49  | 0.35 | 0.36 | 3.3E-03 | 4.2E-03 |
| 3223646 | PSMD5    | 8.07 | 8.25  | 0.40 | 0.37 | 2.5E-03 | 3.4E-03 |
| 2969467 | CDC2L6   | 7.92 | 8.10  | 0.32 | 0.30 | 1.2E-03 | 1.9E-03 |
| 3774823 | CSNK1D   | 9.29 | 9.47  | 0.20 | 0.21 | 1.4E-06 | 1.3E-05 |

## AJHG, Volume 82

|         |          |       |       |      |      |         |         |
|---------|----------|-------|-------|------|------|---------|---------|
| 3420497 | HELB     | 7.01  | 7.19  | 0.38 | 0.35 | 2.8E-03 | 3.7E-03 |
| 2521556 | MARS2    | 8.23  | 8.41  | 0.43 | 0.38 | 6.5E-03 | 7.0E-03 |
| 2321911 | DDI2     | 8.24  | 8.42  | 0.36 | 0.30 | 1.2E-03 | 2.0E-03 |
| 3090697 | CDCA2    | 7.75  | 7.93  | 0.38 | 0.35 | 1.9E-03 | 2.7E-03 |
| 3568080 | C14orf15 | 7.34  | 7.53  | 0.41 | 0.37 | 2.8E-03 | 3.7E-03 |
| 3103494 | TMEM70   | 6.92  | 7.10  | 0.33 | 0.32 | 1.1E-03 | 1.8E-03 |
| 2830010 | SMAD5    | 6.65  | 6.83  | 0.43 | 0.45 | 1.0E-02 | 9.7E-03 |
| 3453370 | ARF3     | 10.21 | 10.39 | 0.25 | 0.23 | 2.7E-05 | 1.2E-04 |
| 2672467 | CCDC12   | 8.12  | 8.30  | 0.16 | 0.23 | 1.2E-06 | 1.2E-05 |
| 2618665 | ZNF619   | 6.42  | 6.61  | 0.29 | 0.26 | 3.1E-05 | 1.3E-04 |
| 2632453 | ARL13B   | 6.93  | 7.11  | 0.39 | 0.39 | 3.5E-03 | 4.4E-03 |
| 2835848 | SLC36A1  | 6.80  | 6.99  | 0.24 | 0.27 | 1.2E-05 | 6.2E-05 |
| 2488959 | STAMBP   | 8.49  | 8.67  | 0.31 | 0.27 | 1.5E-04 | 4.2E-04 |
| 2352228 | CAPZA1   | 10.62 | 10.80 | 0.29 | 0.25 | 6.5E-05 | 2.2E-04 |
| 2800503 | POLS     | 8.77  | 8.95  | 0.34 | 0.27 | 3.0E-04 | 7.1E-04 |
| 3599811 | KIF23    | 8.03  | 8.21  | 0.36 | 0.29 | 5.3E-04 | 1.1E-03 |
| 3600744 | ARIH1    | 8.45  | 8.63  | 0.27 | 0.25 | 3.1E-05 | 1.3E-04 |
| 3457160 | CD63     | 9.99  | 10.17 | 0.26 | 0.22 | 7.6E-06 | 4.5E-05 |
| 3903481 | CDC91L1  | 8.08  | 8.27  | 0.35 | 0.31 | 6.1E-04 | 1.2E-03 |
| 3507003 | LNX2     | 7.23  | 7.41  | 0.28 | 0.30 | 1.7E-05 | 8.2E-05 |
| 2827185 | LMNB1    | 9.59  | 9.77  | 0.29 | 0.30 | 1.8E-04 | 4.8E-04 |
| 2731757 | THAP6    | 6.87  | 7.05  | 0.41 | 0.40 | 3.2E-03 | 4.1E-03 |
| 3262198 | PDCD11   | 7.79  | 7.98  | 0.29 | 0.25 | 3.7E-05 | 1.4E-04 |
| 3467637 | KIAA0701 | 7.08  | 7.26  | 0.30 | 0.33 | 6.1E-04 | 1.2E-03 |
| 3138811 | VCPIP1   | 7.10  | 7.29  | 0.35 | 0.34 | 8.2E-04 | 1.5E-03 |
| 2525053 | CREB1    | 9.03  | 9.21  | 0.30 | 0.26 | 1.1E-04 | 3.3E-04 |
| 3843399 | ZNF134   | 6.64  | 6.83  | 0.35 | 0.35 | 2.1E-03 | 3.0E-03 |
| 3293244 | SARIA    | 9.07  | 9.25  | 0.30 | 0.31 | 5.6E-04 | 1.1E-03 |
| 2870397 | PJA2     | 9.59  | 9.77  | 0.33 | 0.32 | 8.0E-04 | 1.5E-03 |
| 2358743 | SCNM1    | 8.65  | 8.83  | 0.30 | 0.29 | 2.2E-04 | 5.7E-04 |
| 3238491 | BMI1     | 8.14  | 8.32  | 0.41 | 0.42 | 3.4E-03 | 4.3E-03 |
| 3475545 | VPS33A   | 7.70  | 7.88  | 0.32 | 0.26 | 1.6E-04 | 4.5E-04 |
| 2644461 | ARMC8    | 8.04  | 8.23  | 0.33 | 0.31 | 6.3E-04 | 1.2E-03 |

## AJHG, Volume 82

|         |          |       |       |      |      |         |         |
|---------|----------|-------|-------|------|------|---------|---------|
| 3825911 | ZNF101   | 6.80  | 6.98  | 0.34 | 0.36 | 1.5E-03 | 2.3E-03 |
| 3345427 | ENDOD1   | 8.05  | 8.24  | 0.44 | 0.37 | 3.6E-03 | 4.5E-03 |
| 3757487 | DNAJC7   | 9.23  | 9.42  | 0.15 | 0.18 | 1.9E-09 | 9.9E-08 |
| 2907190 | UBR2     | 7.82  | 8.01  | 0.36 | 0.36 | 1.1E-03 | 1.9E-03 |
| 2353237 | VANGL1   | 6.49  | 6.67  | 0.40 | 0.36 | 1.3E-03 | 2.1E-03 |
| 2370317 | MR1      | 8.60  | 8.79  | 0.34 | 0.30 | 5.5E-04 | 1.1E-03 |
| 3557947 | CHMP4A   | 7.72  | 7.91  | 0.23 | 0.21 | 2.3E-06 | 1.9E-05 |
| 3839818 | ZNF175   | 6.51  | 6.70  | 0.41 | 0.30 | 2.1E-03 | 3.0E-03 |
| 2429261 | CSDE1    | 9.80  | 9.98  | 0.31 | 0.31 | 8.9E-04 | 1.6E-03 |
| 3970130 | SYAP1    | 8.02  | 8.21  | 0.45 | 0.45 | 9.9E-03 | 9.6E-03 |
| 3657367 | ZNF267   | 8.44  | 8.62  | 0.36 | 0.40 | 4.2E-03 | 5.1E-03 |
| 3215701 | FANCC    | 6.99  | 7.18  | 0.35 | 0.35 | 1.2E-03 | 2.0E-03 |
| 3743167 | MED31    | 7.54  | 7.73  | 0.37 | 0.40 | 2.5E-03 | 3.4E-03 |
| 3294499 | PPP3CB   | 8.09  | 8.27  | 0.31 | 0.29 | 2.9E-05 | 1.2E-04 |
| 3945133 | POLR2F   | 8.36  | 8.54  | 0.27 | 0.23 | 4.8E-06 | 3.2E-05 |
| 3719112 | ZNHIT3   | 8.22  | 8.41  | 0.33 | 0.26 | 1.0E-04 | 3.2E-04 |
| 2654855 | ATP11B   | 9.13  | 9.32  | 0.25 | 0.24 | 4.6E-06 | 3.1E-05 |
| 3497659 | RAP2A    | 8.89  | 9.08  | 0.38 | 0.33 | 7.2E-04 | 1.4E-03 |
| 3683845 | DCUN1D3  | 6.55  | 6.74  | 0.26 | 0.30 | 1.4E-04 | 4.0E-04 |
| 3332615 | TMEM109  | 10.74 | 10.92 | 0.30 | 0.27 | 1.9E-04 | 5.0E-04 |
| 3708074 | BIRC4BP  | 9.05  | 9.23  | 0.37 | 0.35 | 2.2E-03 | 3.1E-03 |
| 2601544 | CUL3     | 8.71  | 8.90  | 0.32 | 0.33 | 5.7E-04 | 1.1E-03 |
| 2811745 | IPO11    | 7.09  | 7.27  | 0.46 | 0.44 | 7.4E-03 | 7.7E-03 |
| 3368707 | CD59     | 8.24  | 8.42  | 0.40 | 0.36 | 4.2E-03 | 5.0E-03 |
| 3250055 | DDX21    | 9.27  | 9.45  | 0.31 | 0.30 | 2.9E-04 | 7.0E-04 |
| 3771800 | SFRS2    | 10.05 | 10.24 | 0.24 | 0.24 | 1.2E-05 | 6.3E-05 |
| 2947283 | ZNF96    | 6.55  | 6.74  | 0.32 | 0.33 | 6.4E-04 | 1.2E-03 |
| 2875348 | IRF1     | 9.03  | 9.21  | 0.35 | 0.37 | 2.8E-03 | 3.7E-03 |
| 3904691 | SAMHD1   | 8.78  | 8.97  | 0.37 | 0.37 | 1.5E-03 | 2.4E-03 |
| 3741668 | LOC65319 | 6.96  | 7.15  | 0.28 | 0.31 | 5.7E-05 | 2.0E-04 |
| 3129948 | TMEM66   | 9.96  | 10.14 | 0.28 | 0.27 | 3.1E-05 | 1.3E-04 |
| 3451246 | GLT8D3   | 7.31  | 7.49  | 0.37 | 0.30 | 2.7E-04 | 6.6E-04 |
| 3821603 | LOC91561 | 7.85  | 8.04  | 0.40 | 0.33 | 1.2E-03 | 2.0E-03 |



## AJHG, Volume 82

|         |          |      |      |      |      |         |         |
|---------|----------|------|------|------|------|---------|---------|
| 3339261 | IL18BP   | 7.08 | 7.27 | 0.31 | 0.34 | 1.0E-03 | 1.8E-03 |
| 2962525 | IBTK     | 8.62 | 8.81 | 0.34 | 0.36 | 8.9E-04 | 1.6E-03 |
| 2437417 | ASH1L    | 7.90 | 8.09 | 0.33 | 0.34 | 1.1E-03 | 1.8E-03 |
| 3591909 | LOC64906 | 8.38 | 8.56 | 0.34 | 0.33 | 9.3E-04 | 1.6E-03 |
| 2499158 | LOC65308 | 8.77 | 8.96 | 0.41 | 0.35 | 4.0E-03 | 4.9E-03 |
| 3835544 | ZNF155   | 6.91 | 7.09 | 0.35 | 0.31 | 4.8E-04 | 1.0E-03 |
| 3202136 | C9orf82  | 7.50 | 7.69 | 0.31 | 0.30 | 4.4E-05 | 1.7E-04 |
| 3471819 | C12orf30 | 7.26 | 7.45 | 0.30 | 0.32 | 4.0E-04 | 8.9E-04 |
| 3139722 | LOC64606 | 8.26 | 8.45 | 0.36 | 0.29 | 5.8E-04 | 1.1E-03 |
| 2597010 | IDH1     | 7.84 | 8.03 | 0.25 | 0.24 | 1.6E-06 | 1.5E-05 |
| 3565361 | GMFB     | 8.49 | 8.68 | 0.32 | 0.29 | 3.3E-04 | 7.6E-04 |
| 3454296 | LASS5    | 8.02 | 8.21 | 0.26 | 0.27 | 6.0E-05 | 2.1E-04 |
| 2714644 | MGC21675 | 7.81 | 8.00 | 0.33 | 0.31 | 5.0E-04 | 1.0E-03 |
| 3327906 | API5     | 9.16 | 9.35 | 0.31 | 0.28 | 1.4E-04 | 3.9E-04 |
| 2566645 | LOC12953 | 8.00 | 8.19 | 0.37 | 0.42 | 4.3E-03 | 5.1E-03 |
| 2553911 | SMEK2    | 8.68 | 8.87 | 0.33 | 0.34 | 4.1E-04 | 8.9E-04 |
| 2749560 | ETFDH    | 6.87 | 7.05 | 0.45 | 0.42 | 7.7E-03 | 8.0E-03 |
| 3666686 | NIP7     | 9.59 | 9.78 | 0.23 | 0.24 | 8.7E-06 | 5.0E-05 |
| 2470654 | DDX1     | 9.27 | 9.46 | 0.34 | 0.29 | 4.2E-04 | 9.2E-04 |
| 3861978 | PAF1     | 8.40 | 8.59 | 0.23 | 0.21 | 3.9E-07 | 5.1E-06 |
| 3591963 | EIF3S1   | 7.48 | 7.67 | 0.39 | 0.39 | 2.5E-03 | 3.4E-03 |
| 2342391 | TYW3     | 8.73 | 8.92 | 0.42 | 0.38 | 6.3E-03 | 6.8E-03 |
| 3652271 | C16orf52 | 6.70 | 6.89 | 0.46 | 0.41 | 9.8E-03 | 9.5E-03 |
| 3560711 | BAZ1A    | 8.00 | 8.19 | 0.36 | 0.30 | 2.0E-04 | 5.4E-04 |
| 2779408 | MAP2K11P | 8.74 | 8.93 | 0.25 | 0.29 | 8.6E-05 | 2.8E-04 |
| 2934167 | MRPL18   | 8.45 | 8.64 | 0.43 | 0.35 | 2.1E-03 | 3.0E-03 |
| 3490741 | SUGT1P   | 7.95 | 8.14 | 0.34 | 0.32 | 3.9E-04 | 8.7E-04 |
| 3594066 | LOC64561 | 7.69 | 7.88 | 0.36 | 0.31 | 2.3E-04 | 5.9E-04 |
| 3518455 | FBXL3    | 8.90 | 9.09 | 0.34 | 0.34 | 8.5E-04 | 1.5E-03 |
| 2442103 | ALDH9A1  | 8.44 | 8.63 | 0.33 | 0.27 | 2.2E-04 | 5.7E-04 |
| 2858592 | DEPDC1B  | 8.12 | 8.31 | 0.32 | 0.30 | 2.0E-04 | 5.2E-04 |
| 2707359 | DNAJC19  | 6.37 | 6.56 | 0.28 | 0.47 | 1.8E-03 | 2.6E-03 |
| 2395890 | CLSTN1   | 8.41 | 8.60 | 0.29 | 0.27 | 6.5E-05 | 2.2E-04 |

## AJHG, Volume 82

|         |          |       |       |      |      |         |         |
|---------|----------|-------|-------|------|------|---------|---------|
| 3816509 | GADD45B  | 9.22  | 9.41  | 0.37 | 0.33 | 6.6E-04 | 1.3E-03 |
| 3144973 | RAD54B   | 6.73  | 6.92  | 0.34 | 0.39 | 1.2E-03 | 1.9E-03 |
| 3755820 | PERLD1   | 6.75  | 6.94  | 0.20 | 0.26 | 2.2E-05 | 9.9E-05 |
| 3130113 | GTF2E2   | 7.71  | 7.90  | 0.33 | 0.32 | 2.6E-04 | 6.3E-04 |
| 2824198 | APC      | 6.51  | 6.70  | 0.39 | 0.44 | 4.4E-03 | 5.2E-03 |
| 3018696 | DLD      | 9.72  | 9.91  | 0.31 | 0.32 | 7.3E-04 | 1.4E-03 |
| 3728037 | SCPEP1   | 8.74  | 8.93  | 0.28 | 0.27 | 4.8E-05 | 1.8E-04 |
| 2883380 | CRSP9    | 7.18  | 7.37  | 0.37 | 0.32 | 2.8E-04 | 6.7E-04 |
| 3301857 | TM9SF3   | 10.05 | 10.24 | 0.23 | 0.20 | 3.0E-07 | 4.2E-06 |
| 3094447 | ASH2L    | 8.78  | 8.97  | 0.24 | 0.24 | 7.8E-06 | 4.6E-05 |
| 3258168 | KIF11    | 7.67  | 7.86  | 0.46 | 0.43 | 6.8E-03 | 7.2E-03 |
| 2397695 | CASP9    | 7.33  | 7.52  | 0.26 | 0.31 | 2.2E-04 | 5.7E-04 |
| 3800619 | LOC65064 | 8.19  | 8.38  | 0.34 | 0.33 | 5.7E-04 | 1.1E-03 |
| 2388525 | SDCCAG8  | 6.57  | 6.76  | 0.37 | 0.39 | 2.1E-03 | 3.0E-03 |
| 3591704 | WDR76    | 6.78  | 6.98  | 0.37 | 0.36 | 3.2E-04 | 7.4E-04 |
| 2626141 | RPP14    | 7.41  | 7.60  | 0.45 | 0.48 | 9.3E-03 | 9.2E-03 |
| 2574884 | IWS1     | 7.67  | 7.86  | 0.40 | 0.30 | 8.3E-04 | 1.5E-03 |
| 3224366 | MNAB     | 7.78  | 7.97  | 0.30 | 0.29 | 1.2E-04 | 3.5E-04 |
| 2522212 | SGOL2    | 7.11  | 7.30  | 0.36 | 0.36 | 1.4E-03 | 2.2E-03 |
| 2442134 | TMCO1    | 8.29  | 8.48  | 0.37 | 0.34 | 9.3E-04 | 1.6E-03 |
| 3933399 | LOC64540 | 7.89  | 8.09  | 0.29 | 0.23 | 2.0E-05 | 9.4E-05 |
| 3707990 | TXNL5    | 7.10  | 7.29  | 0.42 | 0.33 | 1.3E-03 | 2.1E-03 |
| 3265047 | NHLRC2   | 8.32  | 8.51  | 0.34 | 0.31 | 2.5E-04 | 6.2E-04 |
| 3923702 | TRPM2    | 6.67  | 6.86  | 0.41 | 0.45 | 7.4E-03 | 7.8E-03 |
| 3753690 | PEX12    | 6.65  | 6.84  | 0.32 | 0.28 | 3.9E-05 | 1.5E-04 |
| 2432647 | POLR3C   | 8.75  | 8.94  | 0.32 | 0.29 | 2.4E-04 | 6.0E-04 |
| 2457261 | DUSP10   | 7.92  | 8.11  | 0.44 | 0.45 | 8.5E-03 | 8.6E-03 |
| 2659577 | PAK2     | 8.51  | 8.70  | 0.40 | 0.40 | 3.6E-03 | 4.4E-03 |
| 2693149 | SNX4     | 8.33  | 8.52  | 0.35 | 0.38 | 3.9E-03 | 4.8E-03 |
| 3809324 | TXNL1    | 9.38  | 9.57  | 0.24 | 0.23 | 2.8E-06 | 2.2E-05 |
| 3708462 | CENTB1   | 8.55  | 8.74  | 0.23 | 0.22 | 4.3E-07 | 5.5E-06 |
| 3774029 | NPLOC4   | 9.68  | 9.88  | 0.29 | 0.40 | 2.6E-03 | 3.4E-03 |
| 3991814 | RP3-473B | 6.86  | 7.05  | 0.31 | 0.29 | 1.1E-04 | 3.4E-04 |

AJHG, Volume 82

|         |          |       |       |      |      |         |         |
|---------|----------|-------|-------|------|------|---------|---------|
| 3061456 | SAMD9L   | 8.98  | 9.18  | 0.50 | 0.46 | 9.3E-03 | 9.2E-03 |
| 3989721 | STAG2    | 8.22  | 8.41  | 0.34 | 0.29 | 2.7E-04 | 6.5E-04 |
| 2553970 | PNPT1    | 8.76  | 8.95  | 0.40 | 0.35 | 2.5E-03 | 3.4E-03 |
| 3996667 | SNORA56  | 8.78  | 8.97  | 0.25 | 0.21 | 3.7E-06 | 2.7E-05 |
| 3410384 | LOC65203 | 8.73  | 8.92  | 0.40 | 0.38 | 1.5E-03 | 2.3E-03 |
| 3921391 | WRB      | 7.96  | 8.15  | 0.36 | 0.34 | 7.2E-04 | 1.4E-03 |
| 2876046 | PPP2CA   | 10.11 | 10.30 | 0.24 | 0.23 | 5.7E-06 | 3.7E-05 |
| 3083778 | MCPH1    | 7.20  | 7.39  | 0.36 | 0.35 | 1.4E-03 | 2.2E-03 |
| 3449304 | IPO8     | 7.99  | 8.19  | 0.27 | 0.27 | 1.6E-05 | 8.0E-05 |
| 3409127 | ARNTL2   | 8.24  | 8.44  | 0.42 | 0.44 | 3.5E-03 | 4.4E-03 |
| 3766960 | SMURF2   | 7.32  | 7.52  | 0.30 | 0.30 | 3.0E-04 | 7.0E-04 |
| 3751625 | LOC33904 | 8.41  | 8.61  | 0.35 | 0.30 | 5.1E-04 | 1.1E-03 |
| 2372967 | CDC73    | 7.90  | 8.09  | 0.33 | 0.35 | 5.1E-04 | 1.1E-03 |
| 3617757 | AQR      | 8.05  | 8.24  | 0.30 | 0.29 | 6.9E-05 | 2.3E-04 |
| 3012019 | CLDN12   | 7.50  | 7.69  | 0.46 | 0.47 | 9.0E-03 | 9.0E-03 |
| 3944690 | PSCD4    | 7.96  | 8.15  | 0.41 | 0.44 | 5.8E-03 | 6.4E-03 |
| 3591281 | TMEM62   | 7.34  | 7.54  | 0.36 | 0.38 | 1.6E-03 | 2.5E-03 |
| 2967650 | RTN4IP1  | 6.55  | 6.74  | 0.33 | 0.35 | 3.2E-04 | 7.4E-04 |
| 3620880 | UBR1     | 7.77  | 7.97  | 0.32 | 0.33 | 1.5E-04 | 4.2E-04 |
| 2644155 | NCK1     | 7.58  | 7.77  | 0.37 | 0.36 | 5.8E-04 | 1.1E-03 |
| 3142485 | SLC10A5  | 8.76  | 8.95  | 0.35 | 0.34 | 9.7E-04 | 1.7E-03 |
| 3106276 | C8orf1   | 7.18  | 7.37  | 0.26 | 0.26 | 1.3E-05 | 6.8E-05 |
| 2552153 | FBXO11   | 7.95  | 8.15  | 0.42 | 0.41 | 1.8E-03 | 2.7E-03 |
| 2852989 | RAD1     | 6.51  | 6.71  | 0.38 | 0.36 | 1.6E-03 | 2.5E-03 |
| 4022106 | MBNL3    | 8.21  | 8.40  | 0.37 | 0.30 | 4.8E-04 | 1.0E-03 |
| 2857131 | DHX29    | 7.53  | 7.73  | 0.44 | 0.45 | 7.1E-03 | 7.5E-03 |
| 2789266 | LRBA     | 8.86  | 9.05  | 0.31 | 0.30 | 2.5E-04 | 6.2E-04 |
| 3629103 | KIAA0101 | 9.23  | 9.43  | 0.38 | 0.37 | 1.1E-03 | 1.9E-03 |
| 3306299 | XPNPEP1  | 7.12  | 7.32  | 0.32 | 0.32 | 2.5E-04 | 6.3E-04 |
| 2949859 | PBX2     | 6.60  | 6.79  | 0.45 | 0.37 | 4.1E-03 | 5.0E-03 |
| 3986933 | NXT2     | 6.90  | 7.10  | 0.30 | 0.28 | 1.7E-04 | 4.6E-04 |
| 3829174 | GPATC1   | 6.98  | 7.17  | 0.23 | 0.26 | 1.8E-06 | 1.6E-05 |
| 3421579 | FRS2     | 7.20  | 7.40  | 0.24 | 0.27 | 1.5E-05 | 7.4E-05 |

## AJHG, Volume 82

|         |          |       |       |      |      |         |         |
|---------|----------|-------|-------|------|------|---------|---------|
| 3027915 | SSBP1    | 9.47  | 9.66  | 0.32 | 0.32 | 4.2E-04 | 9.1E-04 |
| 3074640 | MTPN     | 9.95  | 10.15 | 0.27 | 0.26 | 2.9E-05 | 1.2E-04 |
| 3408966 | FGFR1OP2 | 7.92  | 8.11  | 0.34 | 0.37 | 1.1E-03 | 1.9E-03 |
| 2454532 | INTS7    | 7.73  | 7.93  | 0.39 | 0.37 | 1.5E-03 | 2.3E-03 |
| 2914777 | TTK      | 6.98  | 7.17  | 0.45 | 0.42 | 4.4E-03 | 5.2E-03 |
| 2944491 | OACT1    | 7.59  | 7.79  | 0.40 | 0.38 | 4.3E-03 | 5.2E-03 |
| 3739108 | FN3KRP   | 8.25  | 8.44  | 0.24 | 0.27 | 1.0E-05 | 5.8E-05 |
| 2998404 | RALA     | 7.64  | 7.84  | 0.46 | 0.44 | 1.0E-02 | 9.6E-03 |
| 3203855 | WDR40A   | 8.88  | 9.08  | 0.29 | 0.23 | 4.5E-06 | 3.1E-05 |
| 2434575 | CTSS     | 9.22  | 9.42  | 0.35 | 0.31 | 9.5E-04 | 1.7E-03 |
| 3250204 | SUPV3L1  | 8.53  | 8.73  | 0.28 | 0.24 | 5.6E-06 | 3.6E-05 |
| 3659156 | PHKB     | 8.46  | 8.66  | 0.33 | 0.29 | 2.3E-04 | 5.9E-04 |
| 3160895 | LOC64261 | 7.61  | 7.81  | 0.36 | 0.34 | 4.3E-04 | 9.2E-04 |
| 3493391 | FLJ22624 | 7.26  | 7.46  | 0.32 | 0.29 | 1.0E-04 | 3.2E-04 |
| 3904747 | RBL1     | 7.85  | 8.04  | 0.28 | 0.26 | 2.4E-05 | 1.1E-04 |
| 3550485 | VRK1     | 7.97  | 8.17  | 0.48 | 0.37 | 2.4E-03 | 3.3E-03 |
| 3538324 | C14orf10 | 8.57  | 8.77  | 0.31 | 0.31 | 1.7E-04 | 4.6E-04 |
| 2894689 | TMEM14C  | 10.42 | 10.62 | 0.22 | 0.30 | 5.1E-05 | 1.9E-04 |
| 2539821 | ADAM17   | 7.50  | 7.70  | 0.32 | 0.36 | 4.6E-04 | 9.8E-04 |
| 3786039 | PIK3C3   | 7.85  | 8.05  | 0.38 | 0.40 | 1.8E-03 | 2.7E-03 |
| 2693217 | OSBPL11  | 6.90  | 7.10  | 0.37 | 0.39 | 2.8E-03 | 3.7E-03 |
| 2899095 | HIST1H4A | 7.88  | 8.08  | 0.42 | 0.49 | 8.0E-03 | 8.2E-03 |
| 3312490 | LOC44244 | 9.02  | 9.22  | 0.37 | 0.28 | 4.3E-04 | 9.3E-04 |
| 3284882 | LOC64622 | 7.79  | 7.99  | 0.26 | 0.26 | 1.7E-05 | 8.1E-05 |
| 3969081 | TLR7     | 9.83  | 10.02 | 0.56 | 0.36 | 9.2E-03 | 9.1E-03 |
| 3577870 | LOC64769 | 8.13  | 8.33  | 0.31 | 0.28 | 2.3E-04 | 5.9E-04 |
| 2739755 | C4orf16  | 6.81  | 7.01  | 0.44 | 0.47 | 7.3E-03 | 7.6E-03 |
| 3012064 | PFTK1    | 8.21  | 8.41  | 0.44 | 0.42 | 1.5E-03 | 2.3E-03 |
| 3598482 | RAB11A   | 9.67  | 9.87  | 0.38 | 0.36 | 6.7E-04 | 1.3E-03 |
| 2580635 | C2orf25  | 9.28  | 9.48  | 0.44 | 0.44 | 5.8E-03 | 6.4E-03 |
| 3387771 | CCDC82   | 7.30  | 7.50  | 0.38 | 0.36 | 1.1E-03 | 1.9E-03 |
| 2911413 | LOC64759 | 7.40  | 7.60  | 0.47 | 0.48 | 6.5E-03 | 7.0E-03 |
| 3233547 | RBM17    | 7.06  | 7.26  | 0.35 | 0.36 | 5.7E-04 | 1.1E-03 |

## AJHG, Volume 82

|         |          |       |       |      |      |         |         |
|---------|----------|-------|-------|------|------|---------|---------|
| 2828146 | CDC42SE2 | 11.29 | 11.49 | 0.20 | 0.25 | 6.3E-07 | 7.4E-06 |
| 3422855 | GLIPR1   | 8.17  | 8.37  | 0.44 | 0.45 | 5.7E-03 | 6.3E-03 |
| 3980560 | LOC28564 | 7.69  | 7.89  | 0.33 | 0.29 | 6.1E-05 | 2.1E-04 |
| 3256560 | MINPP1   | 7.63  | 7.83  | 0.39 | 0.38 | 1.9E-03 | 2.8E-03 |
| 2423625 | GCLM     | 6.51  | 6.71  | 0.36 | 0.38 | 9.1E-04 | 1.6E-03 |
| 2650538 | LOC64925 | 7.93  | 8.12  | 0.45 | 0.45 | 5.0E-03 | 5.8E-03 |
| 3065963 | ORC5L    | 7.16  | 7.36  | 0.49 | 0.46 | 6.6E-03 | 7.0E-03 |
| 2963313 | SNX14    | 7.75  | 7.95  | 0.40 | 0.38 | 1.1E-03 | 1.9E-03 |
| 2631845 | CHMP2B   | 7.99  | 8.19  | 0.35 | 0.34 | 3.0E-04 | 7.2E-04 |
| 2416218 | ITGB3BP  | 7.80  | 8.00  | 0.48 | 0.46 | 9.7E-03 | 9.4E-03 |
| 3203311 | APTX     | 7.34  | 7.54  | 0.27 | 0.29 | 4.4E-06 | 3.0E-05 |
| 3363979 | PSMA1    | 9.52  | 9.72  | 0.28 | 0.26 | 7.4E-06 | 4.4E-05 |
| 3647827 | ATF7IP2  | 6.74  | 6.94  | 0.43 | 0.43 | 1.6E-03 | 2.5E-03 |
| 3476130 | SBNO1    | 8.71  | 8.91  | 0.24 | 0.24 | 2.7E-06 | 2.1E-05 |
| 2698738 | XRN1     | 8.42  | 8.62  | 0.42 | 0.40 | 2.0E-03 | 2.9E-03 |
| 3720896 | CDC6     | 7.64  | 7.84  | 0.41 | 0.36 | 6.5E-04 | 1.2E-03 |
| 3066297 | SRPK2    | 7.81  | 8.01  | 0.38 | 0.39 | 8.4E-04 | 1.5E-03 |
| 2796066 | LOC64700 | 6.98  | 7.18  | 0.45 | 0.48 | 7.2E-03 | 7.6E-03 |
| 2821417 | LNPEP    | 10.14 | 10.34 | 0.36 | 0.34 | 5.6E-04 | 1.1E-03 |
| 2562821 | VPS24    | 7.87  | 8.07  | 0.30 | 0.28 | 5.9E-05 | 2.1E-04 |
| 2403470 | DNAJC8   | 8.10  | 8.30  | 0.44 | 0.39 | 3.0E-03 | 4.0E-03 |
| 2884658 | SLU7     | 8.19  | 8.39  | 0.35 | 0.36 | 7.9E-04 | 1.5E-03 |
| 2828856 | HSPA4    | 9.27  | 9.47  | 0.35 | 0.29 | 1.7E-04 | 4.7E-04 |
| 2612625 | OXNAD1   | 7.31  | 7.51  | 0.37 | 0.38 | 1.5E-03 | 2.4E-03 |
| 3758234 | AARSD1   | 7.60  | 7.80  | 0.29 | 0.31 | 6.6E-05 | 2.3E-04 |
| 2491661 | VAMP5    | 9.65  | 9.85  | 0.41 | 0.44 | 8.6E-03 | 8.7E-03 |
| 3326540 | PDHX     | 7.56  | 7.76  | 0.34 | 0.30 | 1.7E-04 | 4.6E-04 |
| 2916952 | CASP8AP2 | 7.07  | 7.27  | 0.42 | 0.41 | 2.3E-03 | 3.2E-03 |
| 3988874 | UBE2A    | 8.28  | 8.49  | 0.38 | 0.37 | 9.2E-04 | 1.6E-03 |
| 2712147 | PPP1R2   | 6.53  | 6.73  | 0.32 | 0.34 | 4.2E-04 | 9.2E-04 |
| 3511031 | ELF1     | 10.24 | 10.44 | 0.24 | 0.19 | 4.0E-07 | 5.2E-06 |
| 3295032 | AP3M1    | 9.03  | 9.23  | 0.25 | 0.22 | 9.8E-07 | 1.0E-05 |
| 3426169 | NUDT4    | 6.53  | 6.73  | 0.42 | 0.40 | 3.3E-03 | 4.2E-03 |

## AJHG, Volume 82

|         |          |       |       |      |      |         |         |
|---------|----------|-------|-------|------|------|---------|---------|
| 2960955 | FLJ36868 | 7.16  | 7.36  | 0.36 | 0.41 | 1.5E-03 | 2.4E-03 |
| 3443296 | M6PR     | 10.89 | 11.09 | 0.18 | 0.19 | 8.4E-09 | 2.9E-07 |
| 2685908 | CLDND1   | 9.74  | 9.94  | 0.34 | 0.33 | 6.7E-04 | 1.3E-03 |
| 3458133 | PRIM1    | 8.16  | 8.36  | 0.37 | 0.36 | 4.6E-04 | 9.8E-04 |
| 3994915 | LOC65331 | 7.03  | 7.23  | 0.31 | 0.25 | 2.2E-05 | 1.0E-04 |
| 2830946 | CTNNA1   | 7.92  | 8.13  | 0.34 | 0.30 | 3.5E-04 | 7.9E-04 |
| 2436526 | LOC40264 | 6.68  | 6.89  | 0.34 | 0.33 | 5.3E-04 | 1.1E-03 |
| 2697331 | DBR1     | 6.67  | 6.87  | 0.43 | 0.45 | 5.3E-03 | 6.0E-03 |
| 3270270 | PTPRE    | 6.40  | 6.60  | 0.26 | 0.30 | 4.3E-05 | 1.6E-04 |
| 2652675 | ECT2     | 7.31  | 7.51  | 0.45 | 0.45 | 5.3E-03 | 6.0E-03 |
| 2373842 | PTPRC    | 9.06  | 9.26  | 0.52 | 0.42 | 8.6E-03 | 8.7E-03 |
| 2761285 | FAM44A   | 7.81  | 8.01  | 0.33 | 0.29 | 2.5E-04 | 6.2E-04 |
| 2352106 | LOC64339 | 7.65  | 7.85  | 0.35 | 0.38 | 1.1E-03 | 1.9E-03 |
| 2638017 | C3orf1   | 8.42  | 8.62  | 0.42 | 0.40 | 1.2E-03 | 2.0E-03 |
| 2960010 | LMBRD1   | 8.08  | 8.28  | 0.41 | 0.41 | 9.3E-04 | 1.6E-03 |
| 2794356 | FBXO8    | 7.29  | 7.50  | 0.47 | 0.46 | 7.5E-03 | 7.8E-03 |
| 2829542 | C5orf24  | 7.30  | 7.50  | 0.39 | 0.36 | 1.6E-03 | 2.4E-03 |
| 3157385 | TOP1MT   | 7.14  | 7.35  | 0.26 | 0.26 | 1.3E-05 | 6.8E-05 |
| 3968664 | HCCS     | 8.45  | 8.66  | 0.33 | 0.24 | 2.0E-04 | 5.2E-04 |
| 3243908 | dJ341D10 | 7.47  | 7.67  | 0.45 | 0.41 | 3.2E-03 | 4.1E-03 |
| 3755862 | ZNFN1A3  | 10.55 | 10.76 | 0.24 | 0.18 | 8.3E-07 | 9.0E-06 |
| 2703217 | SCARNA7  | 8.98  | 9.18  | 0.37 | 0.36 | 1.5E-03 | 2.3E-03 |
| 2345617 | PKN2     | 7.70  | 7.90  | 0.39 | 0.38 | 1.4E-03 | 2.2E-03 |
| 3629350 | SPG21    | 9.34  | 9.55  | 0.27 | 0.23 | 3.7E-06 | 2.7E-05 |
| 2364438 | CDCA1    | 7.46  | 7.66  | 0.49 | 0.44 | 8.0E-03 | 8.2E-03 |
| 2520069 | MGC13057 | 6.57  | 6.77  | 0.44 | 0.41 | 4.5E-03 | 5.3E-03 |
| 3508696 | PFAAP5   | 8.22  | 8.42  | 0.35 | 0.35 | 4.2E-04 | 9.1E-04 |
| 3177563 | MAK10    | 8.50  | 8.71  | 0.27 | 0.25 | 2.8E-06 | 2.2E-05 |
| 3803194 | KIAA1012 | 7.36  | 7.56  | 0.27 | 0.26 | 6.6E-06 | 4.1E-05 |
| 2930863 | PCMT1    | 8.45  | 8.66  | 0.36 | 0.37 | 3.5E-04 | 7.9E-04 |
| 3759186 | KIAA0553 | 8.06  | 8.26  | 0.26 | 0.23 | 6.9E-07 | 7.9E-06 |
| 3489418 | SETDB2   | 6.92  | 7.13  | 0.38 | 0.31 | 8.4E-05 | 2.7E-04 |
| 3303300 | CHUK     | 7.50  | 7.70  | 0.34 | 0.31 | 1.3E-04 | 3.8E-04 |

## AJHG, Volume 82

|         |          |       |       |      |      |         |         |
|---------|----------|-------|-------|------|------|---------|---------|
| 2855578 | LOC64691 | 6.70  | 6.90  | 0.37 | 0.41 | 1.1E-03 | 1.8E-03 |
| 3569374 | VTIIB    | 6.65  | 6.85  | 0.46 | 0.47 | 8.1E-03 | 8.3E-03 |
| 3142519 | ZFAND1   | 8.25  | 8.46  | 0.38 | 0.29 | 3.1E-04 | 7.4E-04 |
| 2350339 | STXBP3   | 7.02  | 7.23  | 0.47 | 0.45 | 5.8E-03 | 6.4E-03 |
| 3024275 | MKLN1    | 8.51  | 8.72  | 0.30 | 0.33 | 1.0E-04 | 3.2E-04 |
| 3742627 | UNQ5783  | 10.91 | 11.11 | 0.45 | 0.43 | 4.4E-03 | 5.2E-03 |
| 3297536 | ANXA11   | 10.32 | 10.52 | 0.40 | 0.32 | 6.0E-04 | 1.2E-03 |
| 2505957 | PLEKHB2  | 7.53  | 7.74  | 0.38 | 0.35 | 8.9E-04 | 1.6E-03 |
| 3124333 | C8orf5   | 6.95  | 7.15  | 0.45 | 0.41 | 3.8E-03 | 4.6E-03 |
| 4013359 | LOC64478 | 9.48  | 9.68  | 0.30 | 0.28 | 3.5E-05 | 1.4E-04 |
| 3238761 | MSRB2    | 8.11  | 8.32  | 0.28 | 0.30 | 7.6E-06 | 4.5E-05 |
| 2332566 | PPCS     | 8.28  | 8.49  | 0.42 | 0.36 | 1.4E-03 | 2.3E-03 |
| 2839671 | RARS     | 9.21  | 9.42  | 0.35 | 0.33 | 7.6E-04 | 1.4E-03 |
| 2697564 | PIK3CB   | 7.40  | 7.61  | 0.37 | 0.40 | 9.1E-04 | 1.6E-03 |
| 3638048 | MRPL46   | 8.15  | 8.36  | 0.25 | 0.26 | 5.3E-06 | 3.4E-05 |
| 3191589 | LOC15830 | 7.41  | 7.62  | 0.38 | 0.32 | 1.5E-04 | 4.2E-04 |
| 3231389 | ZMYND11  | 7.36  | 7.57  | 0.31 | 0.34 | 4.8E-05 | 1.8E-04 |
| 2775858 | DKFZp686 | 7.26  | 7.47  | 0.41 | 0.38 | 2.2E-03 | 3.1E-03 |
| 2469711 | PQLC3    | 7.03  | 7.23  | 0.38 | 0.35 | 1.5E-04 | 4.2E-04 |
| 3383138 | NDUFC2   | 7.47  | 7.68  | 0.42 | 0.39 | 1.3E-03 | 2.1E-03 |
| 3608113 | IQGAPI   | 9.50  | 9.70  | 0.27 | 0.26 | 1.3E-05 | 6.9E-05 |
| 3603436 | CHRNA5   | 7.08  | 7.28  | 0.33 | 0.29 | 1.9E-04 | 5.1E-04 |
| 3707642 | RABEP1   | 9.14  | 9.35  | 0.28 | 0.23 | 3.8E-06 | 2.7E-05 |
| 3131844 | LSM1     | 7.65  | 7.86  | 0.25 | 0.24 | 1.8E-06 | 1.6E-05 |
| 2438344 | GPATC4   | 7.09  | 7.30  | 0.34 | 0.32 | 2.6E-04 | 6.4E-04 |
| 2351393 | LOC65321 | 8.38  | 8.58  | 0.21 | 0.27 | 3.2E-06 | 2.4E-05 |
| 2988459 | LOC44125 | 7.18  | 7.39  | 0.39 | 0.40 | 1.5E-03 | 2.4E-03 |
| 3570454 | C14orf11 | 8.11  | 8.32  | 0.47 | 0.38 | 2.0E-03 | 2.9E-03 |
| 3729294 | LOC65374 | 7.91  | 8.11  | 0.38 | 0.35 | 3.5E-04 | 8.0E-04 |
| 2916246 | LOC25402 | 7.02  | 7.23  | 0.42 | 0.47 | 4.8E-03 | 5.6E-03 |
| 3990566 | UTP14A   | 7.29  | 7.50  | 0.37 | 0.37 | 2.5E-04 | 6.2E-04 |
| 2638467 | GTF2E1   | 7.47  | 7.68  | 0.37 | 0.33 | 3.1E-04 | 7.4E-04 |
| 3697799 | AP1G1    | 9.60  | 9.81  | 0.22 | 0.21 | 3.5E-08 | 8.5E-07 |

## AJHG, Volume 82

|         |          |       |       |      |      |         |         |
|---------|----------|-------|-------|------|------|---------|---------|
| 2540477 | ROCK2    | 7.32  | 7.53  | 0.41 | 0.41 | 2.9E-03 | 3.8E-03 |
| 2793054 | CBR4     | 7.37  | 7.58  | 0.47 | 0.43 | 2.2E-03 | 3.1E-03 |
| 3407926 | CMAS     | 7.79  | 8.00  | 0.37 | 0.34 | 2.0E-04 | 5.3E-04 |
| 3331730 | CNTF     | 8.12  | 8.33  | 0.26 | 0.27 | 3.9E-06 | 2.8E-05 |
| 3168508 | MELK     | 7.92  | 8.13  | 0.34 | 0.35 | 2.6E-04 | 6.4E-04 |
| 3687789 | XTP3TPA  | 10.06 | 10.27 | 0.33 | 0.25 | 4.8E-05 | 1.8E-04 |
| 2358171 | KIAA0460 | 8.35  | 8.55  | 0.40 | 0.35 | 1.1E-03 | 1.8E-03 |
| 3432438 | OAS1     | 10.05 | 10.26 | 0.61 | 0.36 | 9.5E-03 | 9.3E-03 |
| 3843180 | ZNF304   | 6.36  | 6.57  | 0.30 | 0.34 | 1.8E-04 | 4.9E-04 |
| 3072435 | FLJ14803 | 8.46  | 8.67  | 0.34 | 0.29 | 7.6E-05 | 2.5E-04 |
| 3310757 | ZNFN1A5  | 7.42  | 7.63  | 0.47 | 0.48 | 7.9E-03 | 8.1E-03 |
| 2541944 | SMC6L1   | 7.56  | 7.77  | 0.47 | 0.39 | 4.8E-03 | 5.6E-03 |
| 3623320 | KIAA0256 | 8.18  | 8.39  | 0.33 | 0.33 | 1.0E-04 | 3.2E-04 |
| 3991109 | RP6-213H | 9.69  | 9.90  | 0.29 | 0.29 | 2.6E-05 | 1.1E-04 |
| 3752611 | C17orf75 | 7.89  | 8.10  | 0.31 | 0.27 | 1.0E-05 | 5.6E-05 |
| 3752002 | CRLF3    | 8.20  | 8.41  | 0.29 | 0.26 | 1.6E-05 | 7.7E-05 |
| 2746119 | SMAD1    | 7.20  | 7.41  | 0.53 | 0.51 | 1.0E-02 | 9.9E-03 |
| 3034987 | CENTA1   | 7.52  | 7.73  | 0.40 | 0.41 | 2.4E-03 | 3.3E-03 |
| 2575134 | WDR33    | 8.61  | 8.82  | 0.28 | 0.25 | 1.3E-06 | 1.3E-05 |
| 3252170 | LOC64945 | 7.94  | 8.15  | 0.41 | 0.38 | 1.1E-03 | 1.8E-03 |
| 3560617 | SNX6     | 8.41  | 8.62  | 0.29 | 0.25 | 1.4E-05 | 7.2E-05 |
| 3216969 | XPA      | 7.58  | 7.79  | 0.29 | 0.30 | 1.6E-05 | 7.7E-05 |
| 3498837 | PCCA     | 6.50  | 6.71  | 0.33 | 0.35 | 2.5E-04 | 6.1E-04 |
| 2619761 | ABHD5    | 6.87  | 7.08  | 0.36 | 0.37 | 7.0E-04 | 1.3E-03 |
| 3982560 | P2RY10   | 7.93  | 8.14  | 0.48 | 0.43 | 2.1E-03 | 3.0E-03 |
| 3624697 | ARPP-19  | 9.77  | 9.98  | 0.28 | 0.24 | 5.9E-06 | 3.8E-05 |
| 2382336 | FBXO28   | 8.24  | 8.45  | 0.31 | 0.33 | 8.9E-05 | 2.8E-04 |
| 2844082 | RUFY1    | 8.01  | 8.22  | 0.28 | 0.20 | 7.1E-07 | 8.1E-06 |
| 3666732 | CYB5B    | 11.25 | 11.46 | 0.24 | 0.25 | 1.7E-06 | 1.5E-05 |
| 2452637 | NUCKS1   | 9.24  | 9.45  | 0.37 | 0.36 | 1.2E-03 | 1.9E-03 |
| 3342983 | TMEM126B | 6.77  | 6.98  | 0.37 | 0.37 | 8.8E-04 | 1.6E-03 |
| 3185522 | SLC31A1  | 8.33  | 8.54  | 0.26 | 0.24 | 6.9E-06 | 4.2E-05 |
| 3460593 | TMBIM4   | 8.41  | 8.62  | 0.39 | 0.36 | 6.2E-04 | 1.2E-03 |



## AJHG, Volume 82

|         |          |       |       |      |      |         |         |
|---------|----------|-------|-------|------|------|---------|---------|
| 3629761 | C15orf44 | 8.49  | 8.71  | 0.25 | 0.25 | 1.8E-06 | 1.6E-05 |
| 2649723 | MFSD1    | 8.33  | 8.54  | 0.37 | 0.34 | 2.8E-04 | 6.7E-04 |
| 3100166 | RAB2     | 8.75  | 8.96  | 0.35 | 0.38 | 2.9E-04 | 6.9E-04 |
| 2664288 | METTL6   | 7.24  | 7.45  | 0.37 | 0.38 | 7.1E-04 | 1.3E-03 |
| 2512701 | TANK     | 9.22  | 9.43  | 0.33 | 0.34 | 1.6E-04 | 4.4E-04 |
| 2812120 | SDCCAG10 | 7.50  | 7.71  | 0.38 | 0.38 | 4.3E-04 | 9.2E-04 |
| 2815455 | UTP15    | 7.18  | 7.40  | 0.43 | 0.46 | 2.8E-03 | 3.7E-03 |
| 2736322 | KIAA0565 | 8.06  | 8.27  | 0.31 | 0.36 | 4.1E-04 | 9.0E-04 |
| 2488785 | ALMS1    | 6.75  | 6.96  | 0.40 | 0.43 | 1.7E-03 | 2.6E-03 |
| 3763270 | MMD      | 9.20  | 9.41  | 0.39 | 0.37 | 4.7E-04 | 9.9E-04 |
| 4017519 | PSMD10   | 7.43  | 7.64  | 0.48 | 0.37 | 1.2E-03 | 1.9E-03 |
| 3598613 | MGC4562  | 7.78  | 8.00  | 0.34 | 0.32 | 5.0E-05 | 1.8E-04 |
| 2544238 | ITSN2    | 7.51  | 7.73  | 0.34 | 0.31 | 2.0E-04 | 5.2E-04 |
| 3857811 | C19orf12 | 7.27  | 7.48  | 0.23 | 0.22 | 1.4E-07 | 2.3E-06 |
| 2784113 | CCNA2    | 9.15  | 9.36  | 0.36 | 0.34 | 1.9E-04 | 5.1E-04 |
| 3441955 | MRPL51   | 10.24 | 10.46 | 0.24 | 0.25 | 1.9E-06 | 1.7E-05 |
| 2525852 | LOC44000 | 8.15  | 8.37  | 0.41 | 0.44 | 2.2E-03 | 3.1E-03 |
| 2428855 | AP4B1    | 7.94  | 8.16  | 0.29 | 0.30 | 7.5E-05 | 2.5E-04 |
| 2651828 | TLOC1    | 6.68  | 6.89  | 0.30 | 0.28 | 3.9E-06 | 2.8E-05 |
| 3544251 | YLPM1    | 7.40  | 7.61  | 0.32 | 0.31 | 6.6E-05 | 2.3E-04 |
| 2822492 | LOC90355 | 6.61  | 6.83  | 0.50 | 0.45 | 4.8E-03 | 5.6E-03 |
| 3468103 | GNPTAB   | 8.42  | 8.64  | 0.38 | 0.31 | 2.1E-04 | 5.5E-04 |
| 3823554 | RAB8A    | 9.36  | 9.57  | 0.29 | 0.28 | 9.7E-06 | 5.4E-05 |
| 2636589 | ATP6V1A  | 9.19  | 9.41  | 0.30 | 0.36 | 2.7E-05 | 1.2E-04 |
| 2791063 | CTSO     | 6.72  | 6.94  | 0.48 | 0.47 | 4.3E-03 | 5.2E-03 |
| 3421177 | NUP107   | 8.35  | 8.56  | 0.36 | 0.29 | 4.5E-05 | 1.7E-04 |
| 2745646 | SMARCA5  | 8.96  | 9.17  | 0.34 | 0.32 | 2.3E-04 | 5.9E-04 |
| 2876257 | SAR1B    | 7.86  | 8.08  | 0.48 | 0.45 | 3.4E-03 | 4.3E-03 |
| 2489606 | POLE4    | 8.18  | 8.40  | 0.34 | 0.35 | 2.8E-04 | 6.7E-04 |
| 2927255 | PEX7     | 6.68  | 6.90  | 0.30 | 0.37 | 1.5E-04 | 4.3E-04 |
| 2651989 | SKIL     | 7.20  | 7.42  | 0.40 | 0.51 | 4.4E-03 | 5.2E-03 |
| 2727913 | EXOC1    | 7.52  | 7.74  | 0.39 | 0.37 | 3.2E-04 | 7.4E-04 |
| 2548274 | STRN     | 7.73  | 7.94  | 0.33 | 0.32 | 8.0E-05 | 2.6E-04 |

## AJHG, Volume 82

|         |          |       |       |      |      |         |         |
|---------|----------|-------|-------|------|------|---------|---------|
| 3511698 | EPSTI1   | 7.93  | 8.15  | 0.58 | 0.49 | 8.3E-03 | 8.5E-03 |
| 3831774 | ZNF383   | 6.91  | 7.12  | 0.44 | 0.37 | 4.9E-04 | 1.0E-03 |
| 2532510 | TNRC15   | 7.47  | 7.69  | 0.36 | 0.34 | 1.1E-04 | 3.4E-04 |
| 2915268 | DOPEY1   | 7.20  | 7.41  | 0.36 | 0.37 | 3.8E-04 | 8.6E-04 |
| 2571979 | SLC35F5  | 7.47  | 7.68  | 0.38 | 0.39 | 6.5E-04 | 1.2E-03 |
| 2941784 | NEDD9    | 7.34  | 7.55  | 0.45 | 0.35 | 3.7E-03 | 4.6E-03 |
| 2638676 | EAF2     | 7.41  | 7.62  | 0.53 | 0.52 | 7.0E-03 | 7.4E-03 |
| 3699080 | MLKL     | 6.96  | 7.18  | 0.30 | 0.32 | 5.2E-05 | 1.9E-04 |
| 3866958 | CARD8    | 8.08  | 8.30  | 0.31 | 0.25 | 1.5E-06 | 1.4E-05 |
| 3623424 | COPS2    | 9.71  | 9.92  | 0.31 | 0.28 | 1.3E-05 | 6.9E-05 |
| 3146565 | RNF19    | 9.24  | 9.45  | 0.26 | 0.29 | 2.6E-06 | 2.0E-05 |
| 3918959 | MRPS6    | 8.37  | 8.59  | 0.29 | 0.39 | 1.7E-04 | 4.6E-04 |
| 3719161 | ZNF403   | 8.56  | 8.78  | 0.28 | 0.26 | 1.1E-05 | 6.1E-05 |
| 3475717 | FLJ11021 | 7.69  | 7.91  | 0.33 | 0.31 | 6.2E-05 | 2.2E-04 |
| 3830353 | CD22     | 7.97  | 8.19  | 0.43 | 0.45 | 3.9E-03 | 4.8E-03 |
| 2712754 | PCYT1A   | 8.11  | 8.33  | 0.34 | 0.28 | 6.9E-05 | 2.4E-04 |
| 2960872 | C6orf150 | 7.57  | 7.79  | 0.50 | 0.48 | 7.8E-03 | 8.0E-03 |
| 2523144 | NOP5/NOP | 9.50  | 9.72  | 0.35 | 0.29 | 1.2E-04 | 3.5E-04 |
| 2818454 | XRCC4    | 7.57  | 7.79  | 0.42 | 0.34 | 6.5E-04 | 1.2E-03 |
| 3321269 | MLSTD2   | 7.69  | 7.91  | 0.44 | 0.38 | 6.5E-04 | 1.2E-03 |
| 4019849 | LAMP2    | 8.09  | 8.31  | 0.42 | 0.38 | 9.8E-04 | 1.7E-03 |
| 2833286 | ARHGAP26 | 6.59  | 6.81  | 0.41 | 0.59 | 9.1E-03 | 9.0E-03 |
| 2342624 | SNORD45A | 8.94  | 9.16  | 0.39 | 0.36 | 8.0E-04 | 1.5E-03 |
| 2328236 | ZCCHC17  | 7.62  | 7.84  | 0.29 | 0.28 | 4.0E-06 | 2.8E-05 |
| 3264326 | ACSL5    | 8.71  | 8.93  | 0.25 | 0.23 | 8.9E-08 | 1.7E-06 |
| 3687342 | HIRIP3   | 6.40  | 6.62  | 0.20 | 0.20 | 2.3E-09 | 1.1E-07 |
| 3917851 | SOD1     | 9.05  | 9.27  | 0.32 | 0.27 | 5.4E-06 | 3.5E-05 |
| 3249587 | SIRT1    | 7.58  | 7.80  | 0.27 | 0.26 | 1.4E-06 | 1.3E-05 |
| 3017206 | PSMC2    | 8.67  | 8.89  | 0.37 | 0.40 | 3.1E-04 | 7.2E-04 |
| 3898126 | TASP1    | 6.50  | 6.72  | 0.43 | 0.34 | 2.9E-04 | 7.0E-04 |
| 2741083 | KIAA1627 | 7.51  | 7.73  | 0.28 | 0.30 | 8.1E-06 | 4.7E-05 |
| 2351572 | CD53     | 12.25 | 12.47 | 0.20 | 0.13 | 6.7E-11 | 6.7E-09 |
| 3804143 | P15RS    | 7.06  | 7.28  | 0.46 | 0.38 | 1.7E-03 | 2.5E-03 |

## AJHG, Volume 82

|         |          |       |       |      |      |         |         |
|---------|----------|-------|-------|------|------|---------|---------|
| 3235461 | C10orf7  | 9.27  | 9.49  | 0.32 | 0.27 | 1.1E-05 | 6.0E-05 |
| 3579546 | WARS     | 11.10 | 11.32 | 0.33 | 0.29 | 5.7E-05 | 2.0E-04 |
| 3262509 | GSTO1    | 6.40  | 6.62  | 0.31 | 0.31 | 1.8E-05 | 8.4E-05 |
| 2745499 | USP38    | 8.20  | 8.42  | 0.29 | 0.32 | 2.3E-05 | 1.1E-04 |
| 3319997 | SWAP70   | 9.10  | 9.32  | 0.33 | 0.33 | 6.1E-05 | 2.1E-04 |
| 3365487 | UEV3     | 7.73  | 7.95  | 0.34 | 0.29 | 3.4E-05 | 1.4E-04 |
| 3221135 | C9orf80  | 8.20  | 8.42  | 0.32 | 0.22 | 1.7E-06 | 1.5E-05 |
| 2949132 | NCR3     | 6.46  | 6.68  | 0.35 | 0.38 | 5.4E-04 | 1.1E-03 |
| 2859494 | P18SRP   | 7.39  | 7.61  | 0.30 | 0.30 | 1.3E-05 | 6.7E-05 |
| 3683783 | LOC65170 | 7.08  | 7.30  | 0.33 | 0.29 | 3.5E-05 | 1.4E-04 |
| 3174224 | SMC5L1   | 7.97  | 8.19  | 0.29 | 0.27 | 4.0E-06 | 2.8E-05 |
| 2346934 | LOC64201 | 8.87  | 9.09  | 0.31 | 0.25 | 2.4E-06 | 2.0E-05 |
| 3561321 | MBIP     | 7.96  | 8.18  | 0.28 | 0.23 | 1.2E-07 | 2.1E-06 |
| 2935475 | QKI      | 7.44  | 7.66  | 0.43 | 0.37 | 5.4E-04 | 1.1E-03 |
| 2957700 | GCLC     | 6.91  | 7.13  | 0.38 | 0.34 | 4.7E-04 | 9.9E-04 |
| 2899022 | TRIM38   | 8.53  | 8.76  | 0.37 | 0.33 | 3.2E-04 | 7.4E-04 |
| 2391647 | SSU72    | 9.25  | 9.47  | 0.29 | 0.25 | 2.8E-06 | 2.2E-05 |
| 2417737 | LRRC40   | 7.63  | 7.85  | 0.49 | 0.49 | 5.5E-03 | 6.2E-03 |
| 3811086 | LOC64218 | 7.40  | 7.62  | 0.34 | 0.32 | 4.1E-05 | 1.6E-04 |
| 3764872 | PTRH2    | 6.92  | 7.15  | 0.39 | 0.42 | 1.8E-03 | 2.7E-03 |
| 3933999 | U2AF1    | 6.99  | 7.21  | 0.37 | 0.35 | 6.2E-04 | 1.2E-03 |
| 3331903 | FAM111B  | 8.26  | 8.48  | 0.34 | 0.34 | 1.3E-04 | 3.8E-04 |
| 2502821 | DBI      | 9.97  | 10.20 | 0.29 | 0.28 | 8.9E-06 | 5.1E-05 |
| 2739160 | HIGD1A   | 8.62  | 8.85  | 0.49 | 0.37 | 1.3E-03 | 2.1E-03 |
| 2348060 | PTBP2    | 7.08  | 7.30  | 0.44 | 0.46 | 3.2E-03 | 4.1E-03 |
| 2425212 | DBT      | 7.14  | 7.36  | 0.45 | 0.44 | 2.3E-03 | 3.2E-03 |
| 2469252 | RRM2     | 11.61 | 11.83 | 0.40 | 0.32 | 1.7E-04 | 4.7E-04 |
| 3528759 | ABHD4    | 7.93  | 8.15  | 0.31 | 0.31 | 1.4E-05 | 7.2E-05 |
| 3690193 | ITFG1    | 7.73  | 7.96  | 0.39 | 0.36 | 1.9E-04 | 5.1E-04 |
| 3470549 | CORO1C   | 10.74 | 10.96 | 0.27 | 0.20 | 6.7E-07 | 7.8E-06 |
| 2713074 | NCBP2    | 8.55  | 8.78  | 0.36 | 0.32 | 7.8E-05 | 2.6E-04 |
| 3725392 | CALCOCO2 | 8.45  | 8.67  | 0.39 | 0.30 | 1.2E-04 | 3.6E-04 |
| 3224437 | ZBTB6    | 7.49  | 7.71  | 0.36 | 0.36 | 2.1E-04 | 5.5E-04 |

## AJHG, Volume 82

|         |          |       |       |      |      |         |         |
|---------|----------|-------|-------|------|------|---------|---------|
| 2655650 | PSMD2    | 8.40  | 8.63  | 0.32 | 0.36 | 1.3E-04 | 3.7E-04 |
| 3435490 | DENR     | 8.45  | 8.67  | 0.31 | 0.28 | 6.4E-06 | 4.0E-05 |
| 2997097 | LOC64691 | 8.41  | 8.63  | 0.55 | 0.48 | 8.3E-03 | 8.4E-03 |
| 3212976 | ZCCHC6   | 8.13  | 8.35  | 0.32 | 0.31 | 1.0E-05 | 5.8E-05 |
| 2931683 | C6orf211 | 7.35  | 7.58  | 0.31 | 0.32 | 2.8E-05 | 1.2E-04 |
| 2973168 | ECHDC1   | 8.61  | 8.84  | 0.45 | 0.38 | 8.2E-04 | 1.5E-03 |
| 3996755 | BRCC3    | 7.59  | 7.82  | 0.26 | 0.21 | 2.1E-08 | 6.2E-07 |
| 3237088 | STAM     | 7.82  | 8.05  | 0.37 | 0.36 | 3.5E-04 | 8.0E-04 |
| 3535922 | STYX     | 8.06  | 8.29  | 0.36 | 0.30 | 1.5E-05 | 7.6E-05 |
| 2735598 | TIGD2    | 6.52  | 6.75  | 0.41 | 0.39 | 6.2E-04 | 1.2E-03 |
| 3284188 | ITGB1    | 8.07  | 8.29  | 0.61 | 0.39 | 7.4E-03 | 7.7E-03 |
| 2954005 | MRPS10   | 8.22  | 8.45  | 0.49 | 0.45 | 3.7E-03 | 4.6E-03 |
| 2620538 | LARS2    | 7.72  | 7.95  | 0.32 | 0.32 | 2.7E-05 | 1.2E-04 |
| 3506431 | RNF6     | 7.52  | 7.75  | 0.28 | 0.29 | 8.9E-07 | 9.5E-06 |
| 3200611 | FAM29A   | 7.98  | 8.21  | 0.28 | 0.31 | 1.1E-05 | 6.1E-05 |
| 3699581 | LOC12449 | 7.81  | 8.03  | 0.23 | 0.20 | 1.2E-09 | 6.9E-08 |
| 3986514 | PRPS1    | 9.16  | 9.38  | 0.29 | 0.26 | 2.6E-06 | 2.0E-05 |
| 3074260 | HSPC049  | 8.84  | 9.07  | 0.39 | 0.41 | 4.2E-04 | 9.2E-04 |
| 2966253 | USP45    | 8.78  | 9.00  | 0.37 | 0.35 | 2.7E-04 | 6.5E-04 |
| 2681195 | UBE1C    | 9.08  | 9.30  | 0.42 | 0.41 | 7.7E-04 | 1.4E-03 |
| 2817053 | SCAMP1   | 8.54  | 8.76  | 0.33 | 0.33 | 3.4E-05 | 1.4E-04 |
| 3926138 | C21orf91 | 7.80  | 8.02  | 0.44 | 0.36 | 2.5E-04 | 6.2E-04 |
| 3176933 | C9orf103 | 7.32  | 7.55  | 0.32 | 0.35 | 1.3E-04 | 3.9E-04 |
| 2532422 | EIF4E2   | 8.61  | 8.83  | 0.20 | 0.26 | 2.1E-07 | 3.2E-06 |
| 2488078 | LOC64993 | 7.62  | 7.85  | 0.59 | 0.48 | 8.1E-03 | 8.3E-03 |
| 2912649 | COL19A1  | 7.13  | 7.36  | 0.56 | 0.53 | 9.7E-03 | 9.4E-03 |
| 3713575 | KIAA0565 | 8.75  | 8.98  | 0.36 | 0.36 | 1.3E-04 | 3.8E-04 |
| 2514122 | LASS6    | 9.50  | 9.73  | 0.41 | 0.37 | 3.5E-04 | 7.9E-04 |
| 3278813 | FAM107B  | 8.32  | 8.55  | 0.50 | 0.43 | 1.9E-03 | 2.8E-03 |
| 3527493 | APEX1    | 9.48  | 9.70  | 0.38 | 0.37 | 4.0E-04 | 8.8E-04 |
| 2901333 | ZNRD1    | 7.43  | 7.66  | 0.41 | 0.36 | 3.0E-04 | 7.2E-04 |
| 2950263 | HLA-DMB  | 10.33 | 10.55 | 0.45 | 0.43 | 2.5E-03 | 3.4E-03 |
| 3089853 | CHMP7    | 6.86  | 7.09  | 0.37 | 0.28 | 4.8E-05 | 1.8E-04 |

AJHG, Volume 82

|         |          |       |       |      |      |         |         |
|---------|----------|-------|-------|------|------|---------|---------|
| 2676518 | SFMBT1   | 6.71  | 6.93  | 0.26 | 0.29 | 4.5E-06 | 3.1E-05 |
| 3800834 | ABHD3    | 7.66  | 7.89  | 0.30 | 0.32 | 2.4E-05 | 1.1E-04 |
| 2981874 | DYNLT1   | 6.91  | 7.14  | 0.37 | 0.42 | 4.7E-04 | 1.0E-03 |
| 3843463 | ZNF587   | 6.86  | 7.09  | 0.32 | 0.34 | 1.4E-04 | 4.1E-04 |
| 2340845 | MIER1    | 7.49  | 7.72  | 0.49 | 0.51 | 3.9E-03 | 4.8E-03 |
| 3835418 | ZNF224   | 6.53  | 6.76  | 0.29 | 0.28 | 5.9E-07 | 7.0E-06 |
| 2407729 | RRAGC    | 7.76  | 7.99  | 0.37 | 0.43 | 1.1E-03 | 1.9E-03 |
| 3332913 | MGC13379 | 6.43  | 6.66  | 0.31 | 0.38 | 1.4E-04 | 4.0E-04 |
| 3249788 | CCAR1    | 8.02  | 8.25  | 0.31 | 0.27 | 7.2E-07 | 8.2E-06 |
| 2427688 | C1orf103 | 7.13  | 7.36  | 0.52 | 0.54 | 7.5E-03 | 7.8E-03 |
| 3864921 | ZNF180   | 6.51  | 6.74  | 0.39 | 0.39 | 3.6E-04 | 8.1E-04 |
| 3986672 | ATG4A    | 7.13  | 7.36  | 0.32 | 0.34 | 3.0E-05 | 1.3E-04 |
| 3982242 | CXorf26  | 7.53  | 7.76  | 0.24 | 0.23 | 2.5E-08 | 7.0E-07 |
| 2893847 | C6orf151 | 6.99  | 7.22  | 0.43 | 0.43 | 9.5E-04 | 1.7E-03 |
| 2730673 | MOBKL1A  | 7.15  | 7.38  | 0.47 | 0.56 | 9.1E-03 | 9.0E-03 |
| 3426828 | VEZT     | 7.20  | 7.43  | 0.38 | 0.35 | 1.4E-04 | 3.9E-04 |
| 2517737 | PLEKHA3  | 6.59  | 6.82  | 0.41 | 0.44 | 3.0E-03 | 3.9E-03 |
| 3203382 | SMU1     | 7.73  | 7.96  | 0.50 | 0.42 | 2.3E-03 | 3.2E-03 |
| 3307120 | ZDHHC6   | 7.93  | 8.16  | 0.31 | 0.33 | 4.4E-06 | 3.1E-05 |
| 3556323 | SUPT16H  | 9.88  | 10.11 | 0.23 | 0.16 | 2.0E-09 | 1.0E-07 |
| 2993206 | MPP6     | 7.36  | 7.59  | 0.35 | 0.35 | 1.7E-04 | 4.6E-04 |
| 2540210 | NOL10    | 6.55  | 6.78  | 0.43 | 0.40 | 2.9E-04 | 7.0E-04 |
| 2473784 | SELI     | 7.69  | 7.92  | 0.35 | 0.35 | 2.1E-04 | 5.4E-04 |
| 3490655 | CKAP2    | 8.45  | 8.69  | 0.31 | 0.29 | 6.0E-06 | 3.8E-05 |
| 2540317 | PDIA6    | 11.57 | 11.80 | 0.28 | 0.22 | 4.0E-07 | 5.2E-06 |
| 2518272 | ITGA4    | 9.49  | 9.72  | 0.57 | 0.43 | 2.1E-03 | 3.0E-03 |
| 2701595 | DHX36    | 7.02  | 7.25  | 0.43 | 0.43 | 5.1E-04 | 1.1E-03 |
| 2379280 | FLVCR    | 7.75  | 7.98  | 0.32 | 0.36 | 9.6E-05 | 3.0E-04 |
| 2654069 | NDUFB5   | 9.21  | 9.44  | 0.38 | 0.36 | 3.4E-04 | 7.8E-04 |
| 2766456 | UGDH     | 8.05  | 8.29  | 0.45 | 0.40 | 2.4E-03 | 3.3E-03 |
| 2919873 | QRSL1    | 7.69  | 7.92  | 0.34 | 0.31 | 1.9E-05 | 8.8E-05 |
| 3943207 | YWHAH    | 8.77  | 9.01  | 0.30 | 0.33 | 2.2E-05 | 1.0E-04 |
| 3017123 | S100A11  | 7.40  | 7.63  | 0.44 | 0.44 | 1.4E-03 | 2.3E-03 |

## AJHG, Volume 82

|         |          |       |       |      |      |         |         |
|---------|----------|-------|-------|------|------|---------|---------|
| 2726072 | ATP10D   | 7.73  | 7.96  | 0.42 | 0.50 | 2.2E-03 | 3.1E-03 |
| 2868904 | ST8SIA4  | 8.27  | 8.50  | 0.33 | 0.33 | 1.7E-05 | 8.3E-05 |
| 3590422 | RTF1     | 7.91  | 8.14  | 0.25 | 0.24 | 5.4E-08 | 1.2E-06 |
| 2428796 | PTPN22   | 7.95  | 8.18  | 0.50 | 0.48 | 2.6E-03 | 3.4E-03 |
| 2417528 | DEPDC1   | 7.55  | 7.79  | 0.53 | 0.53 | 5.9E-03 | 6.5E-03 |
| 2788195 | OTUD4    | 7.96  | 8.20  | 0.41 | 0.46 | 1.3E-03 | 2.1E-03 |
| 3603336 | IREB2    | 8.55  | 8.78  | 0.30 | 0.27 | 2.9E-06 | 2.2E-05 |
| 2720251 | HCAP-G   | 9.04  | 9.27  | 0.36 | 0.29 | 2.2E-06 | 1.8E-05 |
| 3365249 | SAAL1    | 7.35  | 7.58  | 0.40 | 0.36 | 7.9E-05 | 2.6E-04 |
| 3422326 | TBC1D15  | 7.99  | 8.23  | 0.36 | 0.31 | 2.4E-05 | 1.1E-04 |
| 3389529 | KIAA1826 | 7.98  | 8.22  | 0.31 | 0.30 | 1.2E-05 | 6.2E-05 |
| 2733928 | COPS4    | 7.22  | 7.45  | 0.39 | 0.45 | 5.5E-04 | 1.1E-03 |
| 3489020 | RB1      | 9.11  | 9.35  | 0.48 | 0.50 | 2.3E-03 | 3.2E-03 |
| 3997738 | ARSD     | 6.61  | 6.85  | 0.35 | 0.29 | 2.3E-05 | 1.0E-04 |
| 2443518 | C1orf156 | 6.80  | 7.04  | 0.38 | 0.38 | 1.0E-04 | 3.1E-04 |
| 3799415 | AFG3L2   | 8.93  | 9.17  | 0.27 | 0.27 | 7.8E-07 | 8.6E-06 |
| 3401704 | CCND2    | 11.66 | 11.89 | 0.33 | 0.33 | 1.2E-05 | 6.2E-05 |
| 3724197 | LOC65253 | 7.78  | 8.01  | 0.38 | 0.35 | 8.8E-06 | 5.0E-05 |
| 3125001 | LOC65045 | 7.59  | 7.82  | 0.58 | 0.48 | 4.9E-03 | 5.7E-03 |
| 3480013 | LOC64233 | 7.04  | 7.28  | 0.34 | 0.32 | 2.5E-05 | 1.1E-04 |
| 2853388 | FLJ30596 | 6.53  | 6.76  | 0.39 | 0.37 | 4.3E-05 | 1.6E-04 |
| 3018309 | PIK3CG   | 8.30  | 8.53  | 0.58 | 0.57 | 7.3E-03 | 7.6E-03 |
| 3260937 | PEO1     | 6.54  | 6.78  | 0.22 | 0.21 | 2.8E-08 | 7.4E-07 |
| 2856044 | EMB      | 7.96  | 8.19  | 0.55 | 0.52 | 7.1E-03 | 7.5E-03 |
| 3513293 | SUCLA2   | 7.48  | 7.72  | 0.39 | 0.42 | 6.5E-04 | 1.2E-03 |
| 3629698 | DPP8     | 7.87  | 8.11  | 0.34 | 0.33 | 4.6E-05 | 1.7E-04 |
| 3690154 | NETO2    | 8.50  | 8.74  | 0.35 | 0.37 | 8.1E-05 | 2.6E-04 |
| 2587841 | WASPIP   | 9.87  | 10.11 | 0.36 | 0.35 | 1.1E-04 | 3.4E-04 |
| 3145980 | HRSP12   | 7.74  | 7.98  | 0.48 | 0.50 | 2.1E-03 | 3.0E-03 |
| 3563814 | L2HGDH   | 6.77  | 7.01  | 0.44 | 0.36 | 1.9E-04 | 5.0E-04 |
| 3227121 | C9orf78  | 7.41  | 7.65  | 0.21 | 0.24 | 7.7E-09 | 2.7E-07 |
| 2779095 | LOC64734 | 8.07  | 8.31  | 0.27 | 0.39 | 8.5E-05 | 2.7E-04 |
| 3407793 | FLJ22028 | 7.20  | 7.44  | 0.58 | 0.55 | 5.1E-03 | 5.8E-03 |

## AJHG, Volume 82

|         |          |       |       |      |      |         |         |
|---------|----------|-------|-------|------|------|---------|---------|
| 3251490 | CCDC109A | 6.55  | 6.79  | 0.40 | 0.35 | 5.9E-05 | 2.1E-04 |
| 2331727 | CAP1     | 11.28 | 11.52 | 0.22 | 0.22 | 9.3E-09 | 3.1E-07 |
| 3656904 | FUS      | 9.91  | 10.15 | 0.21 | 0.29 | 2.6E-07 | 3.8E-06 |
| 3091628 | ELP3     | 8.57  | 8.81  | 0.28 | 0.24 | 9.6E-08 | 1.8E-06 |
| 3718382 | CCDC16   | 7.63  | 7.88  | 0.28 | 0.28 | 2.2E-06 | 1.8E-05 |
| 3107342 | PPM2C    | 6.83  | 7.07  | 0.24 | 0.28 | 5.4E-08 | 1.2E-06 |
| 3917155 | USP16    | 7.91  | 8.15  | 0.38 | 0.35 | 2.8E-05 | 1.2E-04 |
| 3548929 | RIN3     | 7.61  | 7.85  | 0.35 | 0.34 | 4.8E-05 | 1.8E-04 |
| 3057955 | FGL2     | 6.67  | 6.91  | 0.58 | 0.51 | 7.8E-03 | 8.1E-03 |
| 3716579 | DKFZp667 | 8.07  | 8.31  | 0.39 | 0.39 | 3.4E-04 | 7.7E-04 |
| 3138414 | ARMC1    | 8.59  | 8.84  | 0.30 | 0.27 | 2.8E-06 | 2.2E-05 |
| 3741075 | LOC28400 | 7.35  | 7.59  | 0.35 | 0.33 | 2.1E-05 | 9.6E-05 |
| 3626704 | SLTM     | 8.03  | 8.27  | 0.32 | 0.32 | 7.4E-07 | 8.2E-06 |
| 2847264 | MED10    | 7.74  | 7.98  | 0.29 | 0.34 | 1.7E-05 | 8.1E-05 |
| 2837479 | ICF45    | 8.59  | 8.83  | 0.37 | 0.32 | 8.1E-05 | 2.6E-04 |
| 3139580 | SLCO5A1  | 7.92  | 8.16  | 0.54 | 0.49 | 2.0E-03 | 2.9E-03 |
| 2515369 | HAT1     | 7.62  | 7.86  | 0.56 | 0.52 | 4.6E-03 | 5.4E-03 |
| 3755429 | SNORA21  | 7.71  | 7.96  | 0.39 | 0.30 | 9.1E-05 | 2.9E-04 |
| 3992354 | SLC9A6   | 7.82  | 8.06  | 0.30 | 0.34 | 1.6E-05 | 7.7E-05 |
| 3379390 | SUV420H1 | 6.91  | 7.15  | 0.31 | 0.28 | 2.0E-06 | 1.7E-05 |
| 3004628 | ZNF588   | 7.19  | 7.43  | 0.43 | 0.39 | 3.4E-04 | 7.7E-04 |
| 3668617 | PSMD7    | 9.36  | 9.60  | 0.27 | 0.27 | 4.8E-08 | 1.1E-06 |
| 2339414 | USP1     | 8.23  | 8.48  | 0.48 | 0.44 | 1.4E-03 | 2.2E-03 |
| 3426215 | MRPL42   | 9.42  | 9.66  | 0.33 | 0.27 | 4.0E-06 | 2.8E-05 |
| 3513395 | MED4     | 6.75  | 7.00  | 0.37 | 0.36 | 2.9E-05 | 1.2E-04 |
| 3553607 | EIF5     | 8.91  | 9.15  | 0.28 | 0.31 | 3.1E-06 | 2.3E-05 |
| 3473802 | TAOK3    | 8.80  | 9.04  | 0.32 | 0.27 | 2.6E-06 | 2.0E-05 |
| 3020804 | LSM8     | 7.82  | 8.07  | 0.44 | 0.37 | 2.2E-04 | 5.6E-04 |
| 2694617 | KIAA1160 | 7.53  | 7.78  | 0.39 | 0.32 | 4.0E-05 | 1.5E-04 |
| 3231774 | LOC65001 | 9.02  | 9.27  | 0.20 | 0.23 | 2.9E-09 | 1.3E-07 |
| 3650802 | COQ7     | 6.60  | 6.84  | 0.30 | 0.27 | 1.6E-06 | 1.5E-05 |
| 3047963 | PSMA2    | 6.87  | 7.11  | 0.42 | 0.41 | 7.3E-04 | 1.4E-03 |
| 2481271 | HTLF     | 7.95  | 8.19  | 0.46 | 0.44 | 5.5E-04 | 1.1E-03 |

## AJHG, Volume 82

|         |          |       |       |      |      |         |         |
|---------|----------|-------|-------|------|------|---------|---------|
| 3441215 | C12orf4  | 7.56  | 7.80  | 0.43 | 0.36 | 1.4E-04 | 4.1E-04 |
| 3840372 | ZNF701   | 6.94  | 7.18  | 0.42 | 0.45 | 1.1E-03 | 1.8E-03 |
| 3542207 | SFRS5    | 9.92  | 10.16 | 0.31 | 0.31 | 5.8E-06 | 3.7E-05 |
| 3969946 | U2AF1L2  | 7.49  | 7.73  | 0.37 | 0.43 | 1.8E-04 | 4.9E-04 |
| 3352904 | SC5DL    | 8.30  | 8.55  | 0.39 | 0.42 | 3.0E-04 | 7.2E-04 |
| 3277662 | UPF2     | 7.97  | 8.22  | 0.28 | 0.25 | 2.8E-07 | 4.0E-06 |
| 2413153 | C1orf123 | 8.56  | 8.81  | 0.31 | 0.29 | 4.0E-06 | 2.8E-05 |
| 2962383 | FAM46A   | 7.04  | 7.29  | 0.60 | 0.62 | 1.0E-02 | 9.7E-03 |
| 2972310 | SERINC1  | 8.59  | 8.83  | 0.40 | 0.39 | 5.2E-04 | 1.1E-03 |
| 3656223 | ITGAL    | 8.42  | 8.67  | 0.48 | 0.49 | 3.1E-03 | 4.0E-03 |
| 3449910 | CSF2RA   | 6.75  | 6.99  | 0.54 | 0.51 | 5.2E-03 | 5.9E-03 |
| 3468261 | NUP37    | 8.44  | 8.69  | 0.39 | 0.30 | 1.9E-05 | 8.7E-05 |
| 2816030 | POLK     | 6.90  | 7.15  | 0.52 | 0.48 | 2.3E-03 | 3.2E-03 |
| 3998444 | HDHD1A   | 9.05  | 9.30  | 0.47 | 0.52 | 2.4E-03 | 3.3E-03 |
| 2706297 | TBL1XR1  | 9.16  | 9.41  | 0.38 | 0.36 | 1.2E-04 | 3.7E-04 |
| 3944243 | APOL6    | 7.58  | 7.83  | 0.44 | 0.49 | 1.5E-03 | 2.3E-03 |
| 3018420 | HBP1     | 7.67  | 7.92  | 0.43 | 0.48 | 1.4E-03 | 2.2E-03 |
| 2733767 | MASA     | 8.89  | 9.14  | 0.34 | 0.34 | 2.5E-05 | 1.1E-04 |
| 3872983 | CHMP2A   | 10.24 | 10.49 | 0.23 | 0.25 | 8.7E-08 | 1.7E-06 |
| 3768103 | FLJ25102 | 7.63  | 7.88  | 0.44 | 0.47 | 6.9E-04 | 1.3E-03 |
| 3680610 | GSPT1    | 9.71  | 9.96  | 0.26 | 0.25 | 1.1E-07 | 1.9E-06 |
| 2342576 | ACADM    | 10.42 | 10.67 | 0.33 | 0.27 | 1.3E-06 | 1.2E-05 |
| 3247712 | C10orf70 | 7.25  | 7.50  | 0.44 | 0.40 | 2.0E-04 | 5.2E-04 |
| 2531712 | PSMD1    | 9.07  | 9.32  | 0.35 | 0.31 | 2.1E-05 | 9.5E-05 |
| 2385095 | ARV1     | 7.11  | 7.36  | 0.38 | 0.36 | 8.8E-05 | 2.8E-04 |
| 2417095 | SLC35D1  | 7.72  | 7.97  | 0.50 | 0.48 | 1.4E-03 | 2.2E-03 |
| 2406420 | LOC64298 | 6.59  | 6.84  | 0.44 | 0.41 | 2.0E-04 | 5.2E-04 |
| 2642325 | ATP2C1   | 8.69  | 8.94  | 0.32 | 0.34 | 1.7E-05 | 8.2E-05 |
| 2993727 | SNX10    | 8.02  | 8.27  | 0.43 | 0.49 | 1.5E-03 | 2.3E-03 |
| 4009238 | SMC1L1   | 8.66  | 8.91  | 0.38 | 0.34 | 3.6E-05 | 1.4E-04 |
| 3606034 | PDE8A    | 7.95  | 8.20  | 0.37 | 0.36 | 1.1E-04 | 3.4E-04 |
| 2626097 | ABHD6    | 6.97  | 7.22  | 0.56 | 0.52 | 8.8E-03 | 8.8E-03 |
| 2929036 | LTV1     | 7.53  | 7.78  | 0.42 | 0.36 | 1.1E-04 | 3.4E-04 |



AJHG, Volume 82

|         |          |       |       |      |      |         |         |
|---------|----------|-------|-------|------|------|---------|---------|
| 2756404 | ZNF721   | 7.46  | 7.71  | 0.54 | 0.57 | 6.1E-03 | 6.6E-03 |
| 3940631 | ADRBK2   | 8.68  | 8.93  | 0.37 | 0.32 | 1.1E-05 | 6.1E-05 |
| 3562003 | TRAPPC6B | 8.05  | 8.30  | 0.27 | 0.27 | 2.9E-07 | 4.1E-06 |
| 3818648 | ZNF557   | 7.00  | 7.25  | 0.46 | 0.45 | 1.1E-03 | 1.9E-03 |
| 2862950 | COL4A3BP | 8.70  | 8.95  | 0.42 | 0.36 | 1.3E-05 | 6.8E-05 |
| 3556966 | C14orf94 | 9.05  | 9.30  | 0.29 | 0.26 | 3.1E-07 | 4.3E-06 |
| 3934111 | SNF1LK   | 7.70  | 7.95  | 0.45 | 0.34 | 1.2E-04 | 3.6E-04 |
| 2521446 | ZNF417   | 8.20  | 8.45  | 0.42 | 0.43 | 1.1E-03 | 1.9E-03 |
| 2589929 | SESTD1   | 6.81  | 7.07  | 0.41 | 0.43 | 6.2E-04 | 1.2E-03 |
| 3265494 | TRUB1    | 6.80  | 7.05  | 0.29 | 0.28 | 6.1E-07 | 7.1E-06 |
| 3315549 | PSMD13   | 7.63  | 7.88  | 0.29 | 0.33 | 1.7E-06 | 1.5E-05 |
| 3619326 | PLCB2    | 7.21  | 7.46  | 0.47 | 0.40 | 8.9E-04 | 1.6E-03 |
| 3797015 | ZFP161   | 6.99  | 7.25  | 0.37 | 0.35 | 5.6E-06 | 3.6E-05 |
| 2636483 | RN7SL1   | 8.84  | 9.09  | 0.39 | 0.35 | 4.0E-05 | 1.6E-04 |
| 3991698 | HPRT1    | 9.51  | 9.77  | 0.41 | 0.38 | 8.5E-05 | 2.7E-04 |
| 2347502 | ABCD3    | 7.52  | 7.77  | 0.38 | 0.36 | 3.4E-05 | 1.4E-04 |
| 3089740 | RHOBTB2  | 7.16  | 7.41  | 0.28 | 0.31 | 1.0E-07 | 1.9E-06 |
| 2808748 | LOC64505 | 8.42  | 8.67  | 0.51 | 0.45 | 1.7E-03 | 2.6E-03 |
| 2975680 | LOC65075 | 9.33  | 9.59  | 0.27 | 0.25 | 8.0E-08 | 1.6E-06 |
| 2336383 | PRPF38A  | 9.05  | 9.31  | 0.28 | 0.29 | 1.9E-07 | 3.0E-06 |
| 2529421 | SGPP2    | 9.54  | 9.79  | 0.48 | 0.45 | 2.2E-04 | 5.7E-04 |
| 3568108 | SGPP1    | 8.40  | 8.66  | 0.34 | 0.25 | 1.4E-06 | 1.3E-05 |
| 2903285 | PSMB9    | 11.45 | 11.70 | 0.29 | 0.35 | 9.2E-06 | 5.2E-05 |
| 2369557 | SOAT1    | 8.62  | 8.87  | 0.51 | 0.50 | 1.3E-03 | 2.1E-03 |
| 3031181 | ATP6V0E2 | 7.95  | 8.20  | 0.36 | 0.33 | 9.2E-05 | 2.9E-04 |
| 2899146 | HFE      | 10.95 | 11.20 | 0.45 | 0.52 | 2.8E-03 | 3.7E-03 |
| 3545525 | C14orf15 | 10.88 | 11.13 | 0.27 | 0.26 | 3.1E-08 | 7.9E-07 |
| 3659858 | C16orf69 | 7.48  | 7.73  | 0.37 | 0.30 | 7.8E-06 | 4.6E-05 |
| 2319661 | KIF1B    | 6.75  | 7.00  | 0.40 | 0.37 | 1.0E-04 | 3.2E-04 |
| 3235932 | PRPF18   | 7.10  | 7.36  | 0.41 | 0.35 | 1.9E-05 | 8.7E-05 |
| 3898224 | C20orf6  | 6.44  | 6.69  | 0.38 | 0.37 | 4.4E-05 | 1.7E-04 |
| 3106539 | LOC64276 | 7.14  | 7.39  | 0.40 | 0.42 | 1.4E-04 | 3.9E-04 |
| 2531310 | LOC93349 | 7.72  | 7.98  | 0.49 | 0.47 | 1.6E-05 | 7.8E-05 |

## AJHG, Volume 82

|         |          |       |       |      |      |         |         |
|---------|----------|-------|-------|------|------|---------|---------|
| 3328069 | LOC39011 | 8.51  | 8.76  | 0.47 | 0.38 | 2.5E-04 | 6.2E-04 |
| 3041519 | TRA2A    | 7.93  | 8.18  | 0.48 | 0.44 | 1.2E-03 | 2.0E-03 |
| 3590014 | CASC5    | 7.61  | 7.87  | 0.33 | 0.30 | 8.4E-07 | 9.1E-06 |
| 2384562 | SPHAR    | 7.14  | 7.40  | 0.35 | 0.35 | 1.4E-05 | 7.2E-05 |
| 3458551 | ARHGAP9  | 8.37  | 8.62  | 0.33 | 0.26 | 2.4E-07 | 3.6E-06 |
| 4022833 | MOSPD1   | 6.46  | 6.72  | 0.44 | 0.37 | 8.7E-05 | 2.8E-04 |
| 3471374 | PPP1CC   | 10.72 | 10.98 | 0.22 | 0.22 | 7.6E-10 | 5.2E-08 |
| 2736853 | RAP1GDS1 | 7.67  | 7.92  | 0.48 | 0.46 | 1.1E-03 | 1.9E-03 |
| 3933817 | WDR4     | 7.70  | 7.96  | 0.32 | 0.27 | 1.8E-06 | 1.6E-05 |
| 2950199 | PSMB8    | 9.10  | 9.36  | 0.35 | 0.38 | 3.2E-05 | 1.3E-04 |
| 3214582 | SPTLC1   | 8.31  | 8.57  | 0.29 | 0.28 | 2.9E-07 | 4.1E-06 |
| 3093259 | RBM13    | 8.31  | 8.57  | 0.38 | 0.35 | 5.7E-05 | 2.0E-04 |
| 3447129 | KIAA0528 | 7.57  | 7.83  | 0.31 | 0.31 | 5.2E-07 | 6.4E-06 |
| 2519860 | ASNSD1   | 7.99  | 8.25  | 0.29 | 0.30 | 4.8E-07 | 6.0E-06 |
| 2895721 | NOL7     | 7.87  | 8.13  | 0.42 | 0.53 | 9.0E-04 | 1.6E-03 |
| 2330899 | UTP11L   | 7.80  | 8.06  | 0.39 | 0.38 | 2.0E-05 | 9.4E-05 |
| 2331822 | ZMPSTE24 | 8.47  | 8.73  | 0.41 | 0.34 | 7.2E-05 | 2.4E-04 |
| 2584207 | FAP      | 8.18  | 8.44  | 0.52 | 0.45 | 5.8E-04 | 1.1E-03 |
| 3182957 | NIPSNAP3 | 6.65  | 6.91  | 0.42 | 0.44 | 5.2E-04 | 1.1E-03 |
| 3385175 | PICALM   | 7.68  | 7.94  | 0.35 | 0.35 | 1.1E-05 | 5.9E-05 |
| 3571347 | NUMB     | 8.76  | 9.02  | 0.32 | 0.29 | 9.5E-08 | 1.8E-06 |
| 3236448 | LOC64488 | 7.15  | 7.41  | 0.29 | 0.26 | 1.3E-07 | 2.2E-06 |
| 3010082 | PHTF2    | 7.24  | 7.50  | 0.45 | 0.42 | 7.1E-05 | 2.4E-04 |
| 3368748 | FBXO3    | 7.28  | 7.54  | 0.27 | 0.26 | 5.3E-09 | 2.1E-07 |
| 3504392 | LOC22114 | 7.17  | 7.43  | 0.28 | 0.35 | 2.2E-06 | 1.8E-05 |
| 2735362 | HERC6    | 7.30  | 7.56  | 0.54 | 0.52 | 3.6E-03 | 4.5E-03 |
| 3484641 | BRCA2    | 7.04  | 7.30  | 0.45 | 0.42 | 3.9E-04 | 8.6E-04 |
| 2469910 | LPIN1    | 7.96  | 8.23  | 0.54 | 0.40 | 1.2E-03 | 1.9E-03 |
| 3494706 | FLJ30046 | 8.26  | 8.52  | 0.52 | 0.42 | 7.1E-04 | 1.3E-03 |
| 2946208 | HIST1H4B | 10.82 | 11.08 | 0.46 | 0.57 | 4.1E-03 | 5.0E-03 |
| 3344861 | C11orf54 | 7.97  | 8.23  | 0.40 | 0.32 | 2.6E-05 | 1.1E-04 |
| 3765059 | ABC1     | 6.87  | 7.14  | 0.33 | 0.31 | 3.6E-06 | 2.6E-05 |
| 2604254 | DKFZp762 | 8.61  | 8.87  | 0.37 | 0.32 | 4.6E-06 | 3.1E-05 |

## AJHG, Volume 82

|         |          |       |       |      |      |         |         |
|---------|----------|-------|-------|------|------|---------|---------|
| 3681705 | RRN3     | 9.00  | 9.26  | 0.22 | 0.26 | 3.3E-09 | 1.4E-07 |
| 2421782 | LOC64542 | 7.33  | 7.59  | 0.44 | 0.43 | 2.6E-04 | 6.4E-04 |
| 2921374 | BXDC1    | 8.60  | 8.86  | 0.40 | 0.42 | 2.2E-04 | 5.7E-04 |
| 3513549 | RCBTB2   | 7.69  | 7.95  | 0.36 | 0.37 | 7.6E-05 | 2.5E-04 |
| 3973839 | CYBB     | 10.32 | 10.58 | 0.63 | 0.33 | 3.6E-03 | 4.5E-03 |
| 2730531 | SAS10    | 7.58  | 7.84  | 0.23 | 0.26 | 3.5E-09 | 1.5E-07 |
| 3228097 | TTF1     | 6.86  | 7.12  | 0.36 | 0.32 | 1.6E-05 | 8.0E-05 |
| 2740005 | HDCMA18P | 6.70  | 6.97  | 0.53 | 0.52 | 2.0E-03 | 2.9E-03 |
| 3706219 | LOC64403 | 7.02  | 7.29  | 0.37 | 0.32 | 1.6E-05 | 7.8E-05 |
| 3413067 | FAM113B  | 6.56  | 6.83  | 0.50 | 0.47 | 3.1E-03 | 4.0E-03 |
| 2659560 | PIGX     | 8.34  | 8.60  | 0.37 | 0.36 | 2.7E-05 | 1.2E-04 |
| 2700500 | COMMD2   | 7.87  | 8.13  | 0.38 | 0.35 | 7.3E-05 | 2.5E-04 |
| 3365437 | TSG101   | 8.12  | 8.39  | 0.40 | 0.35 | 2.6E-05 | 1.1E-04 |
| 3252382 | MYST4    | 7.92  | 8.19  | 0.30 | 0.27 | 1.5E-07 | 2.5E-06 |
| 2402068 | SYF2     | 7.15  | 7.42  | 0.40 | 0.36 | 6.5E-05 | 2.2E-04 |
| 3401804 | RAD51AP1 | 8.12  | 8.39  | 0.45 | 0.38 | 1.3E-04 | 3.8E-04 |
| 3364119 | CYP2R1   | 6.82  | 7.08  | 0.39 | 0.32 | 3.2E-05 | 1.3E-04 |
| 2831932 | IK       | 8.00  | 8.26  | 0.47 | 0.44 | 8.0E-04 | 1.5E-03 |
| 3141809 | MRPS28   | 7.07  | 7.34  | 0.46 | 0.42 | 1.6E-04 | 4.4E-04 |
| 3407824 | GOLT1B   | 8.41  | 8.68  | 0.44 | 0.37 | 1.5E-04 | 4.1E-04 |
| 2649532 | RSRC1    | 8.44  | 8.71  | 0.34 | 0.34 | 6.2E-06 | 3.9E-05 |
| 2421271 | 15-Sep   | 9.56  | 9.83  | 0.43 | 0.39 | 8.4E-05 | 2.7E-04 |
| 3256074 | BMPR1A   | 7.44  | 7.71  | 0.66 | 0.30 | 1.5E-03 | 2.3E-03 |
| 3326842 | TRIM44   | 8.26  | 8.53  | 0.28 | 0.26 | 8.6E-08 | 1.7E-06 |
| 3096428 | LOC64704 | 7.60  | 7.87  | 0.32 | 0.40 | 5.5E-05 | 2.0E-04 |
| 2423597 | DNTTIP2  | 7.96  | 8.22  | 0.44 | 0.41 | 1.6E-04 | 4.4E-04 |
| 3766334 | CCDC47   | 8.75  | 9.02  | 0.32 | 0.28 | 3.5E-07 | 4.7E-06 |
| 3734379 | CD300A   | 9.71  | 9.98  | 0.45 | 0.46 | 2.2E-04 | 5.7E-04 |
| 2743370 | LOC13232 | 6.77  | 7.04  | 0.42 | 0.41 | 8.8E-05 | 2.8E-04 |
| 3988435 | DOCK11   | 7.66  | 7.93  | 0.42 | 0.35 | 5.1E-05 | 1.9E-04 |
| 2520225 | NAB1     | 6.67  | 6.94  | 0.42 | 0.47 | 1.8E-04 | 4.8E-04 |
| 2529782 | MRPL44   | 7.94  | 8.21  | 0.47 | 0.46 | 2.1E-04 | 5.4E-04 |
| 3890218 | C20orf43 | 8.67  | 8.94  | 0.32 | 0.28 | 1.5E-06 | 1.4E-05 |

## AJHG, Volume 82

|         |          |       |       |      |      |         |         |
|---------|----------|-------|-------|------|------|---------|---------|
| 3431318 | TCHP     | 6.60  | 6.87  | 0.27 | 0.27 | 6.3E-09 | 2.4E-07 |
| 3594825 | PIGB     | 6.86  | 7.13  | 0.37 | 0.37 | 5.8E-06 | 3.7E-05 |
| 3005266 | LOC44124 | 7.65  | 7.92  | 0.42 | 0.39 | 4.7E-05 | 1.8E-04 |
| 3573261 | SNW1     | 8.34  | 8.61  | 0.36 | 0.28 | 1.9E-06 | 1.6E-05 |
| 2638789 | CD86     | 7.42  | 7.69  | 0.71 | 0.59 | 9.9E-03 | 9.5E-03 |
| 3092276 | LEPROTL1 | 8.00  | 8.27  | 0.30 | 0.28 | 1.1E-07 | 1.9E-06 |
| 2737069 | METAP1   | 9.45  | 9.73  | 0.34 | 0.31 | 1.1E-06 | 1.1E-05 |
| 3130211 | PPP2CB   | 6.96  | 7.23  | 0.41 | 0.46 | 7.3E-05 | 2.5E-04 |
| 2860614 | KENAE    | 6.71  | 6.98  | 0.32 | 0.33 | 2.2E-07 | 3.3E-06 |
| 2899437 | BTN2A1   | 7.52  | 7.79  | 0.35 | 0.35 | 1.3E-06 | 1.3E-05 |
| 3849267 | ZNF558   | 6.56  | 6.83  | 0.53 | 0.50 | 1.1E-03 | 1.9E-03 |
| 2921456 | KIAA1919 | 7.78  | 8.05  | 0.31 | 0.40 | 3.4E-05 | 1.4E-04 |
| 2790570 | PLRG1    | 9.68  | 9.96  | 0.37 | 0.33 | 6.7E-06 | 4.1E-05 |
| 3518977 | C13orf7  | 7.86  | 8.13  | 0.36 | 0.28 | 8.5E-07 | 9.1E-06 |
| 3528115 | C14orf92 | 8.64  | 8.91  | 0.22 | 0.18 | 1.0E-11 | 2.0E-09 |
| 3515009 | VPS36    | 7.74  | 8.01  | 0.31 | 0.33 | 1.1E-07 | 2.0E-06 |
| 3531479 | ARHGAP5  | 7.28  | 7.56  | 0.44 | 0.27 | 3.2E-06 | 2.4E-05 |
| 3793588 | C18orf55 | 6.88  | 7.15  | 0.44 | 0.48 | 2.0E-04 | 5.2E-04 |
| 3089401 | PPP3CC   | 8.04  | 8.32  | 0.28 | 0.31 | 1.1E-07 | 2.0E-06 |
| 2518428 | SSFA2    | 8.19  | 8.47  | 0.51 | 0.49 | 5.0E-04 | 1.0E-03 |
| 3485863 | EXOSC8   | 7.65  | 7.92  | 0.57 | 0.55 | 1.6E-03 | 2.4E-03 |
| 3379644 | CPT1A    | 7.01  | 7.28  | 0.40 | 0.44 | 2.0E-04 | 5.2E-04 |
| 3568667 | MAX      | 6.80  | 7.08  | 0.30 | 0.32 | 1.2E-07 | 2.1E-06 |
| 2326286 | PDIK1L   | 7.55  | 7.82  | 0.40 | 0.49 | 2.5E-04 | 6.3E-04 |
| 3088544 | ATP6V1B2 | 9.57  | 9.84  | 0.31 | 0.36 | 4.0E-06 | 2.8E-05 |
| 2812273 | PPWD1    | 7.39  | 7.66  | 0.37 | 0.35 | 1.2E-05 | 6.3E-05 |
| 3755714 | PPARBP   | 8.40  | 8.67  | 0.26 | 0.25 | 1.6E-09 | 8.3E-08 |
| 3218067 | MRPL50   | 7.46  | 7.74  | 0.39 | 0.34 | 1.5E-05 | 7.5E-05 |
| 2793951 | HMGB2    | 8.86  | 9.13  | 0.40 | 0.44 | 2.0E-04 | 5.3E-04 |
| 2894711 | LOC64520 | 10.71 | 10.99 | 0.23 | 0.31 | 2.0E-08 | 5.8E-07 |
| 2945645 | TTRAP    | 9.34  | 9.62  | 0.29 | 0.29 | 2.4E-07 | 3.6E-06 |
| 3490504 | ALG11    | 6.91  | 7.19  | 0.36 | 0.32 | 3.5E-07 | 4.7E-06 |
| 3617830 | FLJ20582 | 7.57  | 7.85  | 0.45 | 0.43 | 2.3E-04 | 5.8E-04 |

## AJHG, Volume 82

|         |          |      |      |      |      |         |         |
|---------|----------|------|------|------|------|---------|---------|
| 3240095 | RAB18    | 8.10 | 8.37 | 0.34 | 0.29 | 1.3E-06 | 1.3E-05 |
| 2928690 | LOC64448 | 8.15 | 8.42 | 0.47 | 0.40 | 4.7E-05 | 1.7E-04 |
| 3597977 | TRIP4    | 7.37 | 7.65 | 0.23 | 0.23 | 4.3E-09 | 1.8E-07 |
| 2547386 | LOC84661 | 8.22 | 8.50 | 0.47 | 0.45 | 3.5E-04 | 8.0E-04 |
| 2677653 | C3orf63  | 8.71 | 8.99 | 0.44 | 0.36 | 1.2E-05 | 6.5E-05 |
| 2775965 | COQ2     | 7.93 | 8.21 | 0.34 | 0.33 | 1.2E-06 | 1.2E-05 |
| 3994100 | FMR1     | 7.06 | 7.34 | 0.34 | 0.31 | 7.4E-07 | 8.3E-06 |
| 2363808 | FCGR2B   | 7.50 | 7.78 | 0.56 | 0.52 | 2.1E-03 | 3.0E-03 |
| 3197318 | AK3      | 8.69 | 8.97 | 0.41 | 0.37 | 3.1E-05 | 1.3E-04 |
| 2929168 | UTRN     | 7.07 | 7.35 | 0.50 | 0.44 | 9.5E-04 | 1.7E-03 |
| 2514441 | PPIG     | 6.48 | 6.77 | 0.40 | 0.41 | 6.3E-06 | 3.9E-05 |
| 3189311 | PBX3     | 7.76 | 8.05 | 0.57 | 0.55 | 1.3E-03 | 2.1E-03 |
| 3426917 | METAP2   | 8.35 | 8.63 | 0.42 | 0.30 | 4.5E-06 | 3.1E-05 |
| 3828162 | C19orf2  | 8.91 | 9.19 | 0.30 | 0.24 | 1.9E-08 | 5.7E-07 |
| 2750527 | KLHL2    | 6.91 | 7.20 | 0.32 | 0.34 | 1.4E-06 | 1.3E-05 |
| 3383164 | ALG8     | 8.20 | 8.49 | 0.35 | 0.28 | 3.3E-08 | 8.0E-07 |
| 2816298 | IQGAP2   | 7.98 | 8.26 | 0.50 | 0.34 | 2.0E-04 | 5.4E-04 |
| 3665116 | CBFB     | 9.54 | 9.82 | 0.28 | 0.20 | 2.0E-11 | 3.3E-09 |
| 2688717 | BTLA     | 9.03 | 9.31 | 0.54 | 0.48 | 3.0E-04 | 7.2E-04 |
| 2765865 | LOC25398 | 7.36 | 7.64 | 0.33 | 0.34 | 1.5E-07 | 2.5E-06 |
| 2868131 | LOC64271 | 8.94 | 9.22 | 0.43 | 0.40 | 3.3E-05 | 1.3E-04 |
| 2774971 | ANTXR2   | 7.03 | 7.31 | 0.48 | 0.42 | 4.5E-04 | 9.7E-04 |
| 2452667 | RAB7L1   | 7.96 | 8.24 | 0.50 | 0.39 | 3.2E-04 | 7.4E-04 |
| 4043943 | SF3A3    | 9.13 | 9.41 | 0.30 | 0.29 | 5.3E-08 | 1.2E-06 |
| 3432090 | ALDH2    | 8.00 | 8.28 | 0.65 | 0.53 | 4.6E-03 | 5.4E-03 |
| 3965102 | RP1-29C1 | 6.55 | 6.83 | 0.35 | 0.36 | 2.6E-05 | 1.1E-04 |
| 3878429 | POLR3F   | 6.52 | 6.80 | 0.31 | 0.30 | 1.6E-08 | 4.7E-07 |
| 3041294 | DRCTNNB1 | 8.42 | 8.71 | 0.46 | 0.43 | 5.8E-05 | 2.1E-04 |
| 3129149 | PBK      | 7.34 | 7.63 | 0.46 | 0.40 | 5.1E-05 | 1.9E-04 |
| 3173748 | C9orf42  | 7.26 | 7.55 | 0.35 | 0.33 | 1.2E-07 | 2.0E-06 |
| 3841076 | MYADM    | 7.70 | 7.99 | 0.69 | 0.51 | 5.7E-03 | 6.4E-03 |
| 3126087 | CCDC98   | 9.41 | 9.70 | 0.44 | 0.40 | 2.8E-05 | 1.2E-04 |
| 3784602 | GALNT1   | 7.80 | 8.09 | 0.41 | 0.37 | 2.2E-06 | 1.9E-05 |

## AJHG, Volume 82

|         |          |       |       |      |      |         |         |
|---------|----------|-------|-------|------|------|---------|---------|
| 3757970 | PSMC3IP  | 7.18  | 7.47  | 0.37 | 0.32 | 1.7E-06 | 1.5E-05 |
| 3014855 | ZFP95    | 6.97  | 7.26  | 0.19 | 0.22 | 1.9E-12 | 7.1E-10 |
| 3345107 | ANKRD49  | 8.15  | 8.44  | 0.29 | 0.26 | 2.6E-08 | 7.2E-07 |
| 3983105 | CXorf33  | 7.56  | 7.85  | 0.36 | 0.29 | 1.8E-07 | 2.8E-06 |
| 3592054 | RNF36    | 6.91  | 7.20  | 0.64 | 0.48 | 1.8E-03 | 2.6E-03 |
| 3236786 | PTER     | 8.00  | 8.29  | 0.32 | 0.27 | 2.9E-08 | 7.6E-07 |
| 3752709 | MYO1D    | 7.76  | 8.05  | 0.79 | 0.50 | 9.5E-03 | 9.3E-03 |
| 2895244 | EDN1     | 6.70  | 7.00  | 0.50 | 0.56 | 9.7E-04 | 1.7E-03 |
| 3283991 | KIF5B    | 7.67  | 7.96  | 0.56 | 0.62 | 5.0E-03 | 5.8E-03 |
| 3101153 | BHLHB5   | 7.43  | 7.72  | 0.65 | 0.61 | 3.9E-03 | 4.7E-03 |
| 3389745 | CWF19L2  | 6.53  | 6.82  | 0.36 | 0.38 | 2.2E-06 | 1.9E-05 |
| 2601287 | AP1S3    | 6.95  | 7.24  | 0.68 | 0.51 | 5.2E-03 | 5.9E-03 |
| 2468351 | RSAD2    | 6.79  | 7.08  | 0.62 | 0.52 | 2.8E-03 | 3.7E-03 |
| 3365525 | SPTY2D1  | 7.75  | 8.04  | 0.34 | 0.34 | 2.7E-06 | 2.1E-05 |
| 3549220 | C14orf13 | 8.03  | 8.32  | 0.36 | 0.35 | 2.5E-06 | 2.0E-05 |
| 3591400 | 76P      | 7.94  | 8.23  | 0.30 | 0.29 | 3.3E-08 | 8.1E-07 |
| 2427720 | TMEM77   | 9.22  | 9.51  | 0.43 | 0.40 | 1.9E-05 | 8.9E-05 |
| 3489708 | DLEU1    | 6.90  | 7.19  | 0.36 | 0.30 | 2.8E-06 | 2.2E-05 |
| 3517793 | KLF12    | 7.67  | 7.97  | 0.65 | 0.40 | 5.9E-04 | 1.2E-03 |
| 3776193 | SMCHD1   | 8.63  | 8.93  | 0.43 | 0.38 | 7.3E-06 | 4.4E-05 |
| 3382948 | CLNS1A   | 8.58  | 8.88  | 0.35 | 0.33 | 1.2E-06 | 1.2E-05 |
| 3753500 | SLFN11   | 7.07  | 7.37  | 0.79 | 0.63 | 4.6E-03 | 5.4E-03 |
| 2413578 | TMEM59   | 8.97  | 9.26  | 0.35 | 0.27 | 3.1E-07 | 4.3E-06 |
| 2766359 | RFC1     | 8.57  | 8.87  | 0.45 | 0.36 | 6.1E-06 | 3.8E-05 |
| 2514566 | SSB      | 9.76  | 10.06 | 0.34 | 0.45 | 6.4E-05 | 2.2E-04 |
| 3061651 | BET1     | 8.38  | 8.68  | 0.40 | 0.43 | 4.2E-05 | 1.6E-04 |
| 2440295 | CD84     | 6.85  | 7.14  | 0.53 | 0.53 | 3.3E-03 | 4.2E-03 |
| 2403261 | IFI6     | 10.53 | 10.82 | 0.61 | 0.53 | 8.9E-04 | 1.6E-03 |
| 3817984 | SAFB     | 8.00  | 8.30  | 0.47 | 0.46 | 1.7E-04 | 4.6E-04 |
| 3252534 | SAMD8    | 8.57  | 8.87  | 0.26 | 0.22 | 7.9E-10 | 5.2E-08 |
| 3396736 | PUS3     | 6.65  | 6.95  | 0.32 | 0.30 | 1.3E-07 | 2.3E-06 |
| 2696379 | ANAPC13  | 8.61  | 8.91  | 0.29 | 0.30 | 5.1E-08 | 1.1E-06 |
| 3682135 | C16orf63 | 6.75  | 7.05  | 0.43 | 0.42 | 6.2E-06 | 3.9E-05 |

## AJHG, Volume 82

|         |          |       |       |      |      |         |         |
|---------|----------|-------|-------|------|------|---------|---------|
| 2899243 | HIST1H4F | 9.33  | 9.63  | 0.63 | 0.65 | 8.0E-03 | 8.2E-03 |
| 3651639 | LOC57146 | 6.92  | 7.22  | 0.56 | 0.52 | 6.7E-04 | 1.3E-03 |
| 2814527 | BDP1     | 7.21  | 7.51  | 0.41 | 0.33 | 1.7E-06 | 1.5E-05 |
| 2746269 | LSM6     | 9.17  | 9.47  | 0.39 | 0.37 | 8.0E-06 | 4.6E-05 |
| 2350287 | PRPF38B  | 7.75  | 8.05  | 0.35 | 0.30 | 3.2E-07 | 4.4E-06 |
| 2792420 | FLJ38482 | 7.01  | 7.31  | 0.39 | 0.33 | 2.3E-06 | 1.9E-05 |
| 3740304 | MYO1C    | 9.24  | 9.54  | 0.33 | 0.29 | 1.5E-07 | 2.4E-06 |
| 2858793 | DKFZP686 | 8.10  | 8.40  | 0.42 | 0.41 | 2.4E-05 | 1.1E-04 |
| 3182781 | SMC2L1   | 8.01  | 8.31  | 0.41 | 0.36 | 2.7E-06 | 2.1E-05 |
| 2358153 | MRPS21   | 7.53  | 7.83  | 0.66 | 0.70 | 4.6E-03 | 5.4E-03 |
| 3764384 | SUPT4H1  | 8.58  | 8.89  | 0.27 | 0.28 | 7.1E-09 | 2.6E-07 |
| 3603408 | PSMA4    | 10.30 | 10.60 | 0.30 | 0.27 | 2.5E-09 | 1.2E-07 |
| 2656569 | DNAJB11  | 8.84  | 9.14  | 0.48 | 0.34 | 2.2E-05 | 1.0E-04 |
| 2366490 | BLZF1    | 6.98  | 7.29  | 0.48 | 0.50 | 1.4E-04 | 4.0E-04 |
| 2410470 | PIK3R3   | 8.04  | 8.35  | 0.40 | 0.46 | 3.4E-05 | 1.4E-04 |
| 2350840 | GNAI3    | 9.01  | 9.31  | 0.34 | 0.33 | 3.8E-07 | 5.1E-06 |
| 3293998 | FLJ25102 | 7.78  | 8.08  | 0.38 | 0.37 | 1.9E-06 | 1.6E-05 |
| 3403140 | EMG1     | 7.27  | 7.57  | 0.35 | 0.45 | 3.0E-05 | 1.3E-04 |
| 3095719 | GOLGA7   | 8.29  | 8.60  | 0.31 | 0.32 | 3.1E-08 | 7.7E-07 |
| 3811459 | FVT1     | 8.13  | 8.44  | 0.36 | 0.33 | 6.0E-07 | 7.1E-06 |
| 2423175 | FAM69A   | 7.44  | 7.75  | 0.66 | 0.58 | 7.5E-04 | 1.4E-03 |
| 3139950 | LACTB2   | 6.67  | 6.98  | 0.50 | 0.42 | 1.4E-05 | 6.9E-05 |
| 3166844 | CHMP5    | 6.96  | 7.27  | 0.60 | 0.47 | 1.6E-04 | 4.3E-04 |
| 2562867 | RNF103   | 6.88  | 7.19  | 0.57 | 0.61 | 2.5E-04 | 6.3E-04 |
| 3442427 | OACT5    | 9.02  | 9.33  | 0.31 | 0.29 | 3.2E-08 | 8.0E-07 |
| 3791482 | PHLPP    | 7.18  | 7.50  | 0.53 | 0.41 | 1.2E-04 | 3.7E-04 |
| 3869339 | ZNF350   | 6.57  | 6.88  | 0.38 | 0.40 | 1.8E-05 | 8.7E-05 |
| 2875419 | KIF3A    | 6.71  | 7.03  | 0.57 | 0.59 | 1.9E-03 | 2.8E-03 |
| 3429754 | KIAA1033 | 9.13  | 9.44  | 0.33 | 0.29 | 8.1E-09 | 2.8E-07 |
| 2580955 | NMI      | 8.28  | 8.59  | 0.53 | 0.50 | 1.8E-04 | 4.8E-04 |
| 3701384 | C16orf61 | 9.03  | 9.35  | 0.24 | 0.27 | 5.2E-11 | 5.7E-09 |
| 2749699 | RAPGEF2  | 8.48  | 8.79  | 0.78 | 0.55 | 5.8E-03 | 6.4E-03 |
| 3235516 | CAMK1D   | 7.68  | 8.00  | 0.48 | 0.37 | 1.4E-04 | 4.0E-04 |

## AJHG, Volume 82

|         |          |       |       |      |      |         |         |
|---------|----------|-------|-------|------|------|---------|---------|
| 2657981 | CCDC50   | 9.44  | 9.75  | 0.45 | 0.44 | 5.2E-05 | 1.9E-04 |
| 2924898 | RNF146   | 7.23  | 7.54  | 0.37 | 0.35 | 1.3E-06 | 1.2E-05 |
| 2806256 | DNAJA5   | 7.94  | 8.26  | 0.52 | 0.47 | 3.1E-04 | 7.3E-04 |
| 3434393 | DYNLL1   | 9.91  | 10.23 | 0.41 | 0.48 | 1.3E-05 | 6.6E-05 |
| 4006416 | FUNDC1   | 7.86  | 8.17  | 0.35 | 0.32 | 2.8E-08 | 7.4E-07 |
| 3264948 | CASP7    | 8.32  | 8.64  | 0.36 | 0.34 | 8.1E-08 | 1.6E-06 |
| 3114600 | TRMT12   | 6.29  | 6.61  | 0.28 | 0.30 | 8.2E-09 | 2.8E-07 |
| 3949017 | FLJ20699 | 7.45  | 7.77  | 0.24 | 0.34 | 3.9E-08 | 9.1E-07 |
| 3766373 | FTSJ3    | 8.32  | 8.64  | 0.26 | 0.26 | 1.2E-09 | 6.9E-08 |
| 3153328 | FAM49B   | 8.48  | 8.80  | 0.50 | 0.44 | 2.7E-05 | 1.2E-04 |
| 3013952 | ACN9     | 7.89  | 8.21  | 0.53 | 0.46 | 6.9E-05 | 2.3E-04 |
| 3440998 | ENST0000 | 7.25  | 7.57  | 0.34 | 0.27 | 9.1E-09 | 3.0E-07 |
| 2871176 | REEP5    | 8.72  | 9.04  | 0.49 | 0.40 | 8.0E-06 | 4.6E-05 |
| 3607275 | ISG20    | 7.63  | 7.95  | 0.45 | 0.36 | 3.7E-06 | 2.7E-05 |
| 2439554 | AIM2     | 7.63  | 7.95  | 0.62 | 0.49 | 2.7E-04 | 6.6E-04 |
| 3108648 | C8orf47  | 6.51  | 6.83  | 0.36 | 0.45 | 4.8E-06 | 3.2E-05 |
| 3286975 | ANUBL1   | 7.63  | 7.95  | 0.54 | 0.48 | 1.4E-04 | 4.0E-04 |
| 3896370 | RP5-1022 | 8.98  | 9.31  | 0.41 | 0.35 | 1.6E-06 | 1.4E-05 |
| 2732611 | MRPL1    | 7.44  | 7.76  | 0.49 | 0.52 | 7.5E-05 | 2.5E-04 |
| 2487478 | GMCL1    | 7.09  | 7.41  | 0.46 | 0.43 | 2.4E-06 | 1.9E-05 |
| 2503200 | RALB     | 8.47  | 8.80  | 0.33 | 0.35 | 5.4E-07 | 6.6E-06 |
| 3133479 | RNF170   | 6.63  | 6.95  | 0.37 | 0.33 | 2.2E-08 | 6.3E-07 |
| 3628923 | FAM96A   | 8.71  | 9.04  | 0.56 | 0.50 | 3.9E-04 | 8.7E-04 |
| 3111530 | ENY2     | 7.91  | 8.23  | 0.43 | 0.36 | 2.1E-06 | 1.8E-05 |
| 3096368 | HOOK3    | 7.64  | 7.97  | 0.35 | 0.34 | 2.6E-07 | 3.8E-06 |
| 2772566 | IGJ      | 11.84 | 12.17 | 0.77 | 0.53 | 1.0E-03 | 1.8E-03 |
| 3555461 | OSGEP    | 7.78  | 8.11  | 0.26 | 0.27 | 1.1E-09 | 6.3E-08 |
| 2657025 | RTP4     | 7.61  | 7.94  | 0.35 | 0.36 | 1.2E-07 | 2.0E-06 |
| 2823551 | MAN2A1   | 7.28  | 7.60  | 0.58 | 0.59 | 2.7E-04 | 6.5E-04 |
| 2705706 | TNFSF10  | 7.14  | 7.47  | 0.47 | 0.52 | 1.6E-04 | 4.4E-04 |
| 2480589 | CRIP1    | 6.69  | 7.02  | 0.50 | 0.60 | 1.7E-04 | 4.7E-04 |
| 2921402 | SLC16A10 | 7.26  | 7.59  | 0.70 | 0.64 | 4.2E-03 | 5.0E-03 |
| 3367183 | LIN7C    | 7.07  | 7.40  | 0.47 | 0.36 | 4.5E-06 | 3.1E-05 |



## AJHG, Volume 82

|         |          |       |       |      |      |         |         |
|---------|----------|-------|-------|------|------|---------|---------|
| 2654394 | FXR1     | 7.63  | 7.96  | 0.68 | 0.75 | 6.7E-03 | 7.2E-03 |
| 2328868 | HDAC1    | 9.82  | 10.15 | 0.33 | 0.25 | 6.2E-09 | 2.4E-07 |
| 3110171 | ATP6V1C1 | 7.39  | 7.73  | 0.45 | 0.38 | 8.6E-07 | 9.2E-06 |
| 3212848 | GOLPH2   | 6.78  | 7.11  | 0.64 | 0.53 | 5.7E-04 | 1.1E-03 |
| 3956290 | PITPNB   | 8.68  | 9.01  | 0.41 | 0.40 | 2.7E-06 | 2.1E-05 |
| 2899298 | BTN3A2   | 8.00  | 8.33  | 0.58 | 0.45 | 3.2E-04 | 7.4E-04 |
| 2781813 | ELOVL6   | 6.60  | 6.93  | 0.51 | 0.41 | 1.4E-05 | 7.2E-05 |
| 2829488 | DDX46    | 7.32  | 7.65  | 0.44 | 0.41 | 1.5E-05 | 7.5E-05 |
| 3768412 | SLC16A6  | 7.26  | 7.59  | 0.52 | 0.41 | 1.8E-05 | 8.7E-05 |
| 3433843 | SUDS3    | 8.02  | 8.35  | 0.44 | 0.38 | 3.1E-06 | 2.3E-05 |
| 2779823 | SLC39A8  | 9.23  | 9.57  | 0.38 | 0.37 | 1.0E-06 | 1.1E-05 |
| 3020444 | CAPZA2   | 7.99  | 8.32  | 0.45 | 0.47 | 2.6E-05 | 1.1E-04 |
| 2729667 | BRDG1    | 6.72  | 7.05  | 0.61 | 0.50 | 3.6E-04 | 8.2E-04 |
| 3025500 | BPGM     | 8.11  | 8.44  | 0.48 | 0.55 | 9.6E-05 | 3.0E-04 |
| 2772017 | YTHDC1   | 8.48  | 8.82  | 0.32 | 0.28 | 3.9E-09 | 1.6E-07 |
| 2867443 | MCTP1    | 7.08  | 7.41  | 0.74 | 0.60 | 4.6E-04 | 9.8E-04 |
| 3269587 | C10orf13 | 8.38  | 8.71  | 0.39 | 0.40 | 9.4E-07 | 9.9E-06 |
| 3909395 | DPM1     | 8.73  | 9.07  | 0.41 | 0.40 | 6.3E-07 | 7.4E-06 |
| 3392996 | KIAA0999 | 7.05  | 7.39  | 0.40 | 0.33 | 3.0E-08 | 7.6E-07 |
| 2638962 | DTX3L    | 9.44  | 9.78  | 0.46 | 0.44 | 5.2E-06 | 3.4E-05 |
| 2692060 | PARP9    | 10.16 | 10.50 | 0.51 | 0.44 | 6.3E-06 | 3.9E-05 |
| 2651782 | TLOC1    | 8.46  | 8.80  | 0.47 | 0.45 | 4.5E-06 | 3.1E-05 |
| 3270840 | MGMT     | 6.61  | 6.95  | 0.55 | 0.41 | 8.8E-05 | 2.8E-04 |
| 3488985 | ITM2B    | 8.11  | 8.45  | 0.38 | 0.46 | 6.9E-06 | 4.2E-05 |
| 2984500 | T        | 6.68  | 7.02  | 0.56 | 0.77 | 1.4E-03 | 2.2E-03 |
| 2836451 | MFAP3    | 7.05  | 7.39  | 0.39 | 0.40 | 1.4E-07 | 2.3E-06 |
| 3412008 | PPHLN1   | 8.40  | 8.74  | 0.35 | 0.28 | 1.4E-09 | 7.8E-08 |
| 3951768 | CECR1    | 7.79  | 8.14  | 0.52 | 0.50 | 7.8E-05 | 2.6E-04 |
| 2483451 | VRK2     | 7.94  | 8.28  | 0.42 | 0.47 | 7.5E-06 | 4.4E-05 |
| 3841574 | LILRB1   | 8.82  | 9.17  | 0.48 | 0.42 | 5.3E-05 | 1.9E-04 |
| 2909020 | ENPP4    | 6.89  | 7.25  | 0.61 | 0.49 | 3.7E-04 | 8.3E-04 |
| 3178952 | SYK      | 8.94  | 9.29  | 0.68 | 0.44 | 2.9E-04 | 7.0E-04 |
| 3503976 | PSPC1    | 8.34  | 8.69  | 0.26 | 0.24 | 2.2E-12 | 7.4E-10 |

## AJHG, Volume 82

|         |          |      |      |      |      |         |         |
|---------|----------|------|------|------|------|---------|---------|
| 3212277 | C9orf64  | 7.42 | 7.77 | 0.45 | 0.39 | 5.7E-07 | 6.9E-06 |
| 3293537 | PCBD1    | 7.73 | 8.09 | 0.47 | 0.43 | 5.8E-06 | 3.7E-05 |
| 3959918 | TST      | 7.44 | 7.80 | 0.43 | 0.44 | 4.9E-06 | 3.3E-05 |
| 2442858 | BRP44    | 8.30 | 8.66 | 0.45 | 0.49 | 3.7E-06 | 2.7E-05 |
| 3183111 | SLC44A1  | 8.20 | 8.56 | 0.73 | 0.73 | 1.2E-03 | 2.0E-03 |
| 2601341 | WDFY1    | 8.87 | 9.23 | 0.51 | 0.38 | 7.1E-06 | 4.3E-05 |
| 2719656 | CD38     | 9.00 | 9.36 | 0.78 | 0.78 | 8.7E-03 | 8.7E-03 |
| 2336585 | SCP2     | 7.24 | 7.60 | 0.53 | 0.32 | 2.4E-06 | 1.9E-05 |
| 3971806 | SAT      | 7.91 | 8.27 | 0.68 | 0.72 | 3.6E-03 | 4.5E-03 |
| 2477302 | CCDC75   | 8.34 | 8.70 | 0.36 | 0.43 | 1.4E-07 | 2.3E-06 |
| 3747522 | TNFRSF13 | 8.80 | 9.16 | 0.39 | 0.30 | 1.4E-08 | 4.3E-07 |
| 3309215 | EIF3S10  | 9.32 | 9.68 | 0.36 | 0.29 | 7.5E-09 | 2.7E-07 |
| 3781082 | SNRPD1   | 7.23 | 7.59 | 0.39 | 0.37 | 9.4E-08 | 1.8E-06 |
| 2628260 | KBTD8    | 6.88 | 7.24 | 0.56 | 0.50 | 6.9E-05 | 2.3E-04 |
| 3512769 | ZC3H13   | 6.68 | 7.04 | 0.50 | 0.54 | 7.4E-05 | 2.5E-04 |
| 3778372 | LOC64560 | 8.62 | 8.98 | 0.61 | 0.39 | 2.5E-04 | 6.1E-04 |
| 3619991 | NDUFAF1  | 7.96 | 8.32 | 0.40 | 0.32 | 1.5E-08 | 4.6E-07 |
| 2832081 | ZMAT2    | 6.77 | 7.13 | 0.40 | 0.40 | 2.5E-06 | 2.0E-05 |
| 3536905 | KTN1     | 8.17 | 8.53 | 0.44 | 0.39 | 8.4E-08 | 1.6E-06 |
| 3763687 | COIL     | 7.67 | 8.04 | 0.24 | 0.27 | 1.8E-12 | 7.1E-10 |
| 3569814 | HMG1     | 7.57 | 7.94 | 0.85 | 0.89 | 9.0E-03 | 8.9E-03 |
| 3130161 | GSR      | 9.53 | 9.90 | 0.28 | 0.37 | 3.1E-09 | 1.4E-07 |
| 2963407 | SYNCRIP  | 7.60 | 7.97 | 0.37 | 0.37 | 2.8E-07 | 4.0E-06 |
| 3533435 | PNN      | 7.06 | 7.43 | 0.76 | 0.84 | 6.7E-03 | 7.1E-03 |
| 2412529 | NRD1     | 8.49 | 8.86 | 0.38 | 0.36 | 5.9E-09 | 2.3E-07 |
| 3529156 | C14orf12 | 7.25 | 7.62 | 0.32 | 0.32 | 8.7E-10 | 5.3E-08 |
| 2574646 | BIN1     | 8.10 | 8.47 | 0.50 | 0.38 | 2.5E-06 | 2.0E-05 |
| 2370433 | CACNA1E  | 6.82 | 7.19 | 0.76 | 0.62 | 2.3E-03 | 3.2E-03 |
| 3562721 | FKBP3    | 7.23 | 7.60 | 0.56 | 0.52 | 1.7E-05 | 8.0E-05 |
| 3573152 | SPTLC2   | 8.65 | 9.03 | 0.31 | 0.29 | 1.2E-09 | 7.0E-08 |
| 4021469 | PDCD8    | 7.50 | 7.87 | 0.44 | 0.39 | 5.9E-07 | 7.0E-06 |
| 3925473 | SAMSN1   | 7.00 | 7.38 | 0.88 | 0.79 | 9.0E-03 | 8.9E-03 |
| 2405893 | LOC11344 | 8.30 | 8.67 | 0.30 | 0.45 | 6.9E-07 | 7.9E-06 |

## AJHG, Volume 82

|         |          |       |       |      |      |         |         |
|---------|----------|-------|-------|------|------|---------|---------|
| 3364095 | CYP2R1   | 6.81  | 7.18  | 0.55 | 0.48 | 2.7E-05 | 1.2E-04 |
| 2491676 | VAMP8    | 7.96  | 8.34  | 0.39 | 0.41 | 7.8E-08 | 1.6E-06 |
| 3345142 | PIWIL4   | 6.63  | 7.01  | 0.34 | 0.48 | 1.4E-06 | 1.3E-05 |
| 2724472 | HIP2     | 9.21  | 9.59  | 0.29 | 0.37 | 4.8E-09 | 2.0E-07 |
| 3175119 | OSTF1    | 9.32  | 9.70  | 0.29 | 0.30 | 5.5E-11 | 5.7E-09 |
| 2434319 | ANP32E   | 8.56  | 8.94  | 0.42 | 0.37 | 8.8E-08 | 1.7E-06 |
| 3540353 | CHURC1   | 6.81  | 7.19  | 0.42 | 0.44 | 7.3E-06 | 4.4E-05 |
| 3744965 | GAS7     | 6.81  | 7.19  | 0.50 | 0.59 | 1.9E-05 | 9.0E-05 |
| 2717049 | MRFAP1   | 8.47  | 8.85  | 0.34 | 0.27 | 2.9E-10 | 2.3E-08 |
| 2413180 | MAGOH    | 7.64  | 8.02  | 0.45 | 0.50 | 4.2E-06 | 3.0E-05 |
| 3243708 | LOC64432 | 8.44  | 8.83  | 0.33 | 0.29 | 5.2E-10 | 3.8E-08 |
| 2933175 | ZDHHC14  | 7.00  | 7.39  | 0.57 | 0.64 | 2.4E-04 | 6.1E-04 |
| 3718791 | TAF15    | 8.57  | 8.96  | 0.37 | 0.36 | 2.2E-08 | 6.3E-07 |
| 3429857 | LOC38788 | 8.78  | 9.16  | 0.42 | 0.51 | 2.3E-06 | 1.9E-05 |
| 3249738 | HNRPH3   | 7.75  | 8.14  | 0.42 | 0.33 | 1.3E-08 | 4.1E-07 |
| 3959411 | APOL2    | 6.84  | 7.23  | 0.44 | 0.55 | 8.2E-06 | 4.7E-05 |
| 2775909 | PLAC8    | 10.82 | 11.21 | 0.62 | 0.60 | 1.1E-04 | 3.4E-04 |
| 3573994 | C14orf14 | 6.78  | 7.17  | 0.45 | 0.39 | 8.0E-08 | 1.6E-06 |
| 3763656 | TRIM25   | 9.34  | 9.73  | 0.32 | 0.23 | 1.3E-13 | 1.3E-10 |
| 3464000 | CCDC59   | 7.82  | 8.22  | 0.44 | 0.46 | 1.0E-06 | 1.1E-05 |
| 3570049 | ERH      | 9.90  | 10.29 | 0.38 | 0.48 | 1.1E-06 | 1.1E-05 |
| 2619323 | SS18L2   | 8.82  | 9.21  | 0.30 | 0.38 | 8.5E-10 | 5.3E-08 |
| 3354227 | NRGN     | 7.21  | 7.60  | 0.60 | 0.43 | 1.4E-05 | 7.2E-05 |
| 3727712 | PCTP     | 6.76  | 7.16  | 0.32 | 0.35 | 3.3E-10 | 2.5E-08 |
| 2974469 | STX7     | 8.47  | 8.87  | 0.43 | 0.40 | 1.5E-07 | 2.4E-06 |
| 3874751 | PRNP     | 7.40  | 7.79  | 0.71 | 0.58 | 2.4E-04 | 6.0E-04 |
| 3040967 | RAPGEF5  | 6.65  | 7.05  | 0.62 | 0.58 | 8.9E-05 | 2.8E-04 |
| 2638077 | PLA1A    | 8.26  | 8.66  | 0.98 | 0.83 | 5.0E-03 | 5.8E-03 |
| 3289235 | LOC65348 | 7.41  | 7.81  | 0.54 | 0.48 | 5.0E-06 | 3.3E-05 |
| 3026988 | LUC7L2   | 8.50  | 8.90  | 0.30 | 0.27 | 3.6E-13 | 2.6E-10 |
| 3877776 | SNRPB2   | 6.81  | 7.21  | 0.53 | 0.48 | 2.1E-06 | 1.8E-05 |
| 3443868 | CD69     | 9.24  | 9.65  | 0.72 | 0.58 | 1.0E-04 | 3.2E-04 |
| 2871685 | PGGT1B   | 7.78  | 8.19  | 0.49 | 0.40 | 1.1E-06 | 1.1E-05 |

## AJHG, Volume 82

|         |          |      |       |      |      |         |         |
|---------|----------|------|-------|------|------|---------|---------|
| 3684039 | CRYM     | 6.82 | 7.23  | 0.58 | 0.58 | 7.0E-05 | 2.4E-04 |
| 2351632 | CEPT1    | 9.23 | 9.64  | 0.43 | 0.33 | 5.8E-08 | 1.2E-06 |
| 3560403 | EGLN3    | 7.60 | 8.01  | 1.06 | 0.88 | 1.0E-02 | 9.6E-03 |
| 3114365 | FAM91A2  | 8.75 | 9.16  | 0.43 | 0.35 | 3.6E-08 | 8.6E-07 |
| 2547716 | FAM98A   | 8.62 | 9.03  | 0.45 | 0.35 | 2.9E-08 | 7.6E-07 |
| 3795942 | YES1     | 7.20 | 7.61  | 0.50 | 0.49 | 1.9E-06 | 1.6E-05 |
| 3764738 | FAM33A   | 9.72 | 10.14 | 0.32 | 0.26 | 2.6E-12 | 7.8E-10 |
| 2977510 | FUCA2    | 7.70 | 8.12  | 0.42 | 0.42 | 3.8E-08 | 9.1E-07 |
| 2365119 | MGST3    | 8.41 | 8.83  | 0.54 | 0.43 | 1.7E-07 | 2.7E-06 |
| 3263555 | ADD3     | 8.12 | 8.54  | 0.53 | 0.49 | 5.1E-06 | 3.4E-05 |
| 2409613 | PRNPIP   | 7.10 | 7.52  | 0.45 | 0.50 | 5.7E-07 | 6.9E-06 |
| 3624362 | LEO1     | 7.75 | 8.16  | 0.36 | 0.33 | 2.5E-11 | 3.4E-09 |
| 2946369 | HIST1H3G | 9.01 | 9.43  | 0.55 | 0.42 | 4.5E-07 | 5.7E-06 |
| 3042610 | SCAP2    | 8.15 | 8.57  | 0.43 | 0.46 | 3.5E-07 | 4.8E-06 |
| 2328273 | SERINC2  | 8.28 | 8.71  | 0.74 | 0.73 | 6.0E-04 | 1.2E-03 |
| 3802129 | SS18     | 8.73 | 9.16  | 0.33 | 0.33 | 1.6E-11 | 2.7E-09 |
| 3503224 | UPF3A    | 7.45 | 7.88  | 0.43 | 0.41 | 1.3E-08 | 4.1E-07 |
| 2783473 | LOC40115 | 7.77 | 8.20  | 0.61 | 0.71 | 1.7E-04 | 4.7E-04 |
| 2420958 | C1orf181 | 7.43 | 7.86  | 0.59 | 0.47 | 1.3E-05 | 6.6E-05 |
| 3645626 | IL32     | 8.73 | 9.16  | 0.89 | 0.79 | 3.1E-03 | 4.0E-03 |
| 2933331 | SNX9     | 7.39 | 7.82  | 0.61 | 0.58 | 4.4E-05 | 1.7E-04 |
| 3629243 | RBPMS2   | 7.59 | 8.03  | 0.72 | 0.85 | 6.1E-04 | 1.2E-03 |
| 3320301 | CTR9     | 8.67 | 9.10  | 0.35 | 0.30 | 4.1E-12 | 1.1E-09 |
| 2973995 | LOC40122 | 7.99 | 8.43  | 0.60 | 0.52 | 1.1E-05 | 6.1E-05 |
| 3354443 | SLC37A2  | 7.45 | 7.89  | 0.69 | 0.52 | 2.5E-06 | 2.0E-05 |
| 2827057 | GRAMD3   | 7.11 | 7.55  | 0.55 | 0.57 | 1.3E-05 | 6.7E-05 |
| 3032017 | NYREN18  | 9.05 | 9.50  | 0.39 | 0.33 | 4.1E-11 | 4.8E-09 |
| 3549575 | IFI27    | 6.66 | 7.11  | 0.64 | 0.82 | 1.1E-04 | 3.3E-04 |
| 3716337 | CCDC55   | 6.99 | 7.44  | 0.34 | 0.32 | 5.7E-13 | 2.9E-10 |
| 2867836 | GLRX     | 7.26 | 7.71  | 0.52 | 0.62 | 3.5E-06 | 2.6E-05 |
| 2517408 | AGPS     | 8.16 | 8.61  | 0.43 | 0.36 | 8.2E-10 | 5.2E-08 |
| 3173673 | PIP5K1B  | 7.36 | 7.82  | 0.73 | 0.47 | 2.4E-05 | 1.1E-04 |
| 3009959 | PTPN12   | 6.79 | 7.25  | 0.50 | 0.45 | 7.0E-08 | 1.5E-06 |

## AJHG, Volume 82

|         |          |      |       |      |      |         |         |
|---------|----------|------|-------|------|------|---------|---------|
| 2366422 | ATP1B1   | 8.66 | 9.12  | 0.98 | 0.96 | 1.9E-03 | 2.8E-03 |
| 2477073 | CRIM1    | 8.30 | 8.77  | 1.07 | 0.87 | 1.8E-03 | 2.7E-03 |
| 4002741 | ACOT9    | 7.25 | 7.72  | 0.39 | 0.34 | 5.4E-11 | 5.7E-09 |
| 4003895 | CXorf21  | 7.91 | 8.38  | 0.65 | 0.58 | 6.4E-06 | 4.0E-05 |
| 3538087 | DACT1    | 7.28 | 7.75  | 0.97 | 0.81 | 8.4E-04 | 1.5E-03 |
| 3944404 | APOL1    | 7.60 | 8.09  | 0.74 | 0.70 | 4.3E-05 | 1.6E-04 |
| 3982612 | GPR174   | 7.98 | 8.46  | 0.98 | 0.77 | 8.1E-04 | 1.5E-03 |
| 2396009 | LZIC     | 7.19 | 7.69  | 0.40 | 0.39 | 4.1E-11 | 4.8E-09 |
| 2779638 | PPP3CA   | 8.01 | 8.50  | 0.62 | 0.49 | 7.6E-07 | 8.4E-06 |
| 2372858 | RGS2     | 7.45 | 7.95  | 1.15 | 1.03 | 6.0E-03 | 6.6E-03 |
| 3257246 | IFIT1    | 8.78 | 9.28  | 1.05 | 0.76 | 9.7E-04 | 1.7E-03 |
| 2438892 | FCRL5    | 7.86 | 8.37  | 0.94 | 0.88 | 9.1E-04 | 1.6E-03 |
| 3447863 | KRAS     | 7.57 | 8.09  | 0.47 | 0.44 | 1.4E-09 | 7.8E-08 |
| 2759303 | MRFAP1L1 | 6.59 | 7.12  | 0.56 | 0.53 | 2.9E-08 | 7.6E-07 |
| 2421883 | LOC40075 | 7.58 | 8.12  | 0.57 | 0.65 | 1.6E-06 | 1.4E-05 |
| 3243262 | LOC64281 | 7.11 | 7.66  | 0.68 | 0.63 | 5.2E-06 | 3.4E-05 |
| 2487412 | GMCL1    | 8.23 | 8.79  | 0.55 | 0.56 | 8.4E-08 | 1.6E-06 |
| 2980449 | PIP3-E   | 8.57 | 9.13  | 0.92 | 0.67 | 3.6E-05 | 1.4E-04 |
| 3220673 | LTB4DH   | 6.76 | 7.32  | 0.67 | 0.74 | 6.2E-06 | 3.9E-05 |
| 2495881 | EIF5B    | 7.94 | 8.52  | 0.55 | 0.46 | 2.7E-09 | 1.2E-07 |
| 2860178 | CD180    | 8.45 | 9.07  | 0.89 | 0.65 | 4.4E-06 | 3.0E-05 |
| 3772719 | LGALS3BP | 6.93 | 7.55  | 0.48 | 0.84 | 5.4E-07 | 6.6E-06 |
| 3150844 | LOC64498 | 6.91 | 7.53  | 0.63 | 0.57 | 5.0E-08 | 1.1E-06 |
| 2945882 | CMAH     | 6.43 | 7.06  | 0.50 | 0.49 | 9.2E-12 | 2.0E-09 |
| 3895118 | CPXM     | 7.67 | 8.30  | 1.02 | 0.85 | 3.7E-05 | 1.4E-04 |
| 3724858 | TBX21    | 6.70 | 7.34  | 0.51 | 0.53 | 5.9E-12 | 1.5E-09 |
| 2914070 | MYO6     | 7.66 | 8.30  | 0.91 | 0.77 | 5.7E-06 | 3.6E-05 |
| 4011989 | CXCR3    | 7.37 | 8.02  | 0.62 | 0.55 | 5.7E-09 | 2.2E-07 |
| 3621692 | MFAP1    | 7.21 | 7.88  | 0.46 | 0.34 | 5.1E-15 | 7.7E-12 |
| 2939034 | SERPINB9 | 9.95 | 10.62 | 0.77 | 0.54 | 3.2E-09 | 1.4E-07 |
| 3718555 | SLFN5    | 8.01 | 8.70  | 1.20 | 1.17 | 2.9E-03 | 3.8E-03 |
| 2671101 | TMEM16K  | 7.19 | 7.89  | 0.87 | 0.79 | 8.0E-07 | 8.8E-06 |
| 2938972 | SERPINB1 | 7.60 | 8.31  | 0.86 | 0.75 | 7.6E-08 | 1.6E-06 |

|         |          |       |       |      |      |         |         |
|---------|----------|-------|-------|------|------|---------|---------|
| 2936657 | CCR6     | 7.75  | 8.46  | 1.04 | 0.93 | 2.2E-05 | 1.0E-04 |
| 2939014 | SERPINB1 | 7.20  | 7.94  | 0.61 | 0.61 | 8.9E-12 | 2.0E-09 |
| 3404436 | CLEC2D   | 9.03  | 9.79  | 0.86 | 0.43 | 7.3E-09 | 2.6E-07 |
| 3581637 | LOC39071 | 8.16  | 8.94  | 1.06 | 0.85 | 1.8E-05 | 8.4E-05 |
| 2708855 | C11orf72 | 7.24  | 8.08  | 0.71 | 0.61 | 2.6E-10 | 2.1E-08 |
| 2563785 | LOC65150 | 10.08 | 11.10 | 2.27 | 1.56 | 8.6E-04 | 1.5E-03 |

<sup>a</sup> denotes the average expression level of genes ( $\log_2$  transformed).

<sup>b</sup> denotes the standard deviation of expression level of genes.

<sup>c</sup> denotes the p values using a general linear model.

<sup>d</sup> indicates the q-values reported by software QVALUE (see Methods).

**Table S3. Local and Distant eQTLs Associated with Expression of the Differential Genes between the CEU and YRI Samples**

| <i>Affymetrix<br/>Transcript<br/>Cluster ID</i> | <i>Chr</i> | <i>Symbol</i>          | <i>eQTL<sup>a</sup></i> | <i>eQTL<br/>Chr<sup>a</sup></i> | <i>eQTL Gene<sup>a</sup></i> | <i>r<sup>2b</sup></i> | <i>P<sup>b</sup></i> | <i>Mode</i> | <i>Fst<sup>c</sup></i> |
|-------------------------------------------------|------------|------------------------|-------------------------|---------------------------------|------------------------------|-----------------------|----------------------|-------------|------------------------|
| 2405893                                         | 1          | C1orf212               | rs4733983               | 8                               | ADAM32                       | 0.36                  | 9.00E-09             | CEU_distant | NA                     |
| 3404436                                         | 12         | CLEC2D                 | rs7208345               | 17                              |                              | 0.32                  | 2.00E-08             | CEU_distant | 0.12                   |
| 2405893                                         | 1          | C1orf212               | rs2570037               | 17                              | PITPNC1                      | 0.33                  | 1.00E-08             | CEU_distant | 0.12                   |
| 2829171                                         | 5          | TCF7                   | rs7390885               | 9                               |                              | 0.36                  | 2.00E-09             | CEU_distant | 0.07                   |
| 2576554                                         | 2          | LOC646836              | rs623861                | 6                               | C6orf146                     | 0.41                  | 1.00E-10             | CEU_distant | 0.07                   |
| 2405893                                         | 1          | C1orf212               | rs2456337               | 1                               | LOC127602                    | 0.37                  | 1.00E-09             | CEU_distant | 0.05                   |
| 3726569                                         | 17         | SPATA20                | rs4700264               | 5                               |                              | 0.35                  | 7.00E-09             | CEU_distant | 0.05                   |
| 2904000                                         | 6          | HMGA1 ///<br>LOC442205 | rs1281008               | 1                               | C1orf127                     | 0.32                  | 2.00E-08             | CEU_distant | 0.05                   |
| 2405893                                         | 1          | C1orf212               | rs624549                | 18                              | GNAL                         | 0.35                  | 1.00E-08             | CEU_distant | 0.05                   |
| 2405893                                         | 1          | C1orf212               | rs7704557               | 5                               | RARS                         | 0.33                  | 2.00E-08             | CEU_distant | 0.04                   |
| 4011989                                         | X          | CXCR3                  | rs2121598               | 1                               |                              | 0.35                  | 3.00E-09             | CEU_distant | 0.04                   |
| 2550325                                         | 2          | OXER1                  | rs16995039              | 4                               | TMEM156                      | 0.33                  | 1.00E-08             | CEU_distant | 0.03                   |
| 2576554                                         | 2          | LOC646836              | rs7627538               | 3                               |                              | 0.36                  | 4.00E-09             | CEU_distant | 0.03                   |
| 4011989                                         | X          | CXCR3                  | rs12028543              | 1                               |                              | 0.38                  | 6.00E-10             | CEU_distant | 0.03                   |
| 4011989                                         | X          | CXCR3                  | rs12030529              | 1                               |                              | 0.38                  | 5.00E-10             | CEU_distant | 0.03                   |
| 3404436                                         | 12         | CLEC2D                 | rs643831                | 7                               | SDK1                         | 0.35                  | 2.00E-08             | CEU_distant | 0.03                   |
| 3704376                                         | 16         | FAM38A                 | rs3914907               | 12                              |                              | 0.32                  | 1.00E-08             | CEU_distant | 0.03                   |
| 3872983                                         | 19         | CHMP2A                 | rs11139442              | 9                               |                              | 0.32                  | 2.00E-08             | CEU_distant | 0.03                   |
| 3404436                                         | 12         | CLEC2D                 | rs873690                | 6                               | KCNK5                        | 0.32                  | 1.00E-08             | CEU_distant | 0.03                   |
| 3404436                                         | 12         | CLEC2D                 | rs1568098               | 3                               | MDS1                         | 0.32                  | 2.00E-08             | CEU_distant | 0.03                   |
| 3404436                                         | 12         | CLEC2D                 | rs11230968              | 11                              |                              | 0.32                  | 2.00E-08             | CEU_distant | 0.03                   |
| 3704495                                         | 16         | APRT                   | rs13325716              | 3                               |                              | 0.34                  | 4.00E-09             | CEU_distant | 0.03                   |
| 3704495                                         | 16         | APRT                   | rs17235757              | 3                               |                              | 0.34                  | 4.00E-09             | CEU_distant | 0.03                   |
| 3404436                                         | 12         | CLEC2D                 | rs16853325              | 3                               | MDS1                         | 0.33                  | 2.00E-08             | CEU_distant | 0.03                   |
| 3404436                                         | 12         | CLEC2D                 | rs17746143              | 4                               |                              | 0.37                  | 8.00E-10             | CEU_distant | 0.03                   |
| 3704495                                         | 16         | APRT                   | rs9817200               | 3                               |                              | 0.33                  | 1.00E-08             | CEU_distant | 0.02                   |
| 3404436                                         | 12         | CLEC2D                 | rs2220392               | 3                               | MDS1                         | 0.34                  | 6.00E-09             | CEU_distant | 0.02                   |

## AJHG, Volume 82

|         |    |                       |            |    |                      |      |          |             |      |
|---------|----|-----------------------|------------|----|----------------------|------|----------|-------------|------|
| 3726569 | 17 | SPATA20               | rs10053213 | 5  |                      | 0.32 | 2.00E-08 | CEU_distant | 0.02 |
| 3726569 | 17 | SPATA20               | rs2409009  | 5  |                      | 0.32 | 2.00E-08 | CEU_distant | 0.02 |
| 2576554 | 2  | LOC646836             | rs10485172 | 6  | C6orf146             | 0.42 | 2.00E-10 | CEU_distant | 0.02 |
| 3704495 | 16 | APRT                  | rs9842692  | 3  |                      | 0.34 | 4.00E-09 | CEU_distant | 0.02 |
| 2405893 | 1  | C1orf212              | rs1808692  | 17 | PITPNC1              | 0.33 | 1.00E-08 | CEU_distant | 0.01 |
| 2328868 | 1  | HDAC1                 | rs471045   | 1  | C1orf184             | 0.32 | 2.00E-08 | CEU_distant | 0.01 |
| 3726569 | 17 | SPATA20               | rs10069996 | 5  |                      | 0.36 | 7.00E-09 | CEU_distant | 0.01 |
| 3726569 | 17 | SPATA20               | rs10068496 | 5  |                      | 0.33 | 2.00E-08 | CEU_distant | 0.01 |
| 3704495 | 16 | APRT                  | rs9881237  | 3  |                      | 0.34 | 4.00E-09 | CEU_distant | 0.01 |
| 4011989 | X  | CXCR3                 | rs2981614  | 17 |                      | 0.32 | 2.00E-08 | CEU_distant | 0.01 |
| 3404436 | 12 | CLEC2D                | rs7614678  | 3  | WDR52                | 0.33 | 2.00E-08 | CEU_distant | 0.01 |
| 3404436 | 12 | CLEC2D                | rs7650500  | 3  | WDR52                | 0.33 | 1.00E-08 | CEU_distant | 0.01 |
| 2405893 | 1  | C1orf212              | rs7576634  | 2  |                      | 0.44 | 6.00E-12 | CEU_distant | 0.01 |
| 3404436 | 12 | CLEC2D                | rs10471186 | 4  |                      | 0.40 | 4.00E-10 | CEU_distant | 0.01 |
| 2871685 | 5  | PGGT1B                | rs7650879  | 3  |                      | 0.32 | 2.00E-08 | CEU_distant | 0.00 |
| 3604287 | 15 | IL16                  | rs1344367  | 5  |                      | 0.35 | 2.00E-09 | CEU_distant | 0.00 |
| 2394361 | 1  | NPHP4                 | rs17356003 | 1  |                      | 0.37 | 2.00E-08 | CEU_distant | 0.00 |
| 2405893 | 1  | C1orf212              | rs1111058  | 10 | CAMK1D               | 0.35 | 9.00E-09 | CEU_distant | 0.00 |
| 2400793 | 1  | HSPG2                 | rs2117359  | 5  |                      | 0.32 | 2.00E-08 | CEU_distant | 0.00 |
| 2489071 | 2  | MGC22014              | rs4473237  | 17 |                      | 0.32 | 2.00E-08 | CEU_distant | 0.00 |
| 3726569 | 17 | SPATA20               | rs2194192  | 5  |                      | 0.32 | 2.00E-08 | CEU_distant | 0.00 |
| 3726569 | 17 | SPATA20               | rs4700265  | 5  |                      | 0.32 | 2.00E-08 | CEU_distant | 0.00 |
| 3726569 | 17 | SPATA20               | rs10066944 | 5  |                      | 0.33 | 2.00E-08 | CEU_distant | 0.00 |
| 3404436 | 12 | CLEC2D                | rs17618794 | 12 |                      | 0.34 | 1.00E-08 | CEU_distant | 0.00 |
| 3503976 | 13 | PSPC1                 | rs10025097 | 4  |                      | 0.32 | 2.00E-08 | CEU_distant | 0.00 |
| 2336585 | 1  | LOC653511 ///<br>SCP2 | rs504816   | 1  | ZYG11A               | 0.32 | 1.00E-08 | CEU_local   | NA   |
| 2576554 | 2  | LOC646836             | rs10196582 | 2  |                      | 0.49 | 5.00E-13 | CEU_local   | NA   |
| 2576554 | 2  | LOC646836             | rs10205714 | 2  |                      | 0.50 | 2.00E-13 | CEU_local   | NA   |
| 2576554 | 2  | LOC646836             | rs7561542  | 2  | TUBA4A ///<br>TUBA3D | 0.47 | 4.00E-12 | CEU_local   | NA   |
| 2946215 | 6  | HIST1H3B              | rs1150660  | 6  |                      | 0.54 | 1.00E-15 | CEU_local   | NA   |
| 3757602 | 17 | LGP2                  | rs2277621  | 17 | LGP2 ///<br>GCN5L2   | 0.37 | 1.00E-09 | CEU_local   | 0.53 |



## AJHG, Volume 82

|         |    |                       |            |    |                    |      |          |           |      |
|---------|----|-----------------------|------------|----|--------------------|------|----------|-----------|------|
| 3757602 | 17 | LGP2                  | rs2074154  | 17 | LGP2               | 0.38 | 5.00E-10 | CEU_local | 0.52 |
| 3757602 | 17 | LGP2                  | rs2074166  | 17 | GCN5L2             | 0.39 | 2.00E-10 | CEU_local | 0.50 |
| 3757602 | 17 | LGP2                  | rs2074164  | 17 | GCN5L2             | 0.37 | 8.00E-10 | CEU_local | 0.50 |
| 3757602 | 17 | LGP2                  | rs3744484  | 17 | LGP2 ///<br>GCN5L2 | 0.38 | 6.00E-10 | CEU_local | 0.50 |
| 3757602 | 17 | LGP2                  | rs11079033 | 17 | LGP2               | 0.45 | 3.00E-11 | CEU_local | 0.49 |
| 3757602 | 17 | LGP2                  | rs739636   | 17 | RAB5C              | 0.37 | 1.00E-09 | CEU_local | 0.46 |
| 3757602 | 17 | LGP2                  | rs8072215  | 17 | GCN5L2             | 0.37 | 1.00E-09 | CEU_local | 0.46 |
| 3757602 | 17 | LGP2                  | rs2074158  | 17 | LGP2               | 0.37 | 4.00E-10 | CEU_local | 0.43 |
| 3757602 | 17 | LGP2                  | rs12603327 | 17 | RAB5C              | 0.37 | 4.00E-10 | CEU_local | 0.38 |
| 3757602 | 17 | LGP2                  | rs7214921  | 17 | RAB5C              | 0.37 | 6.00E-10 | CEU_local | 0.38 |
| 3757602 | 17 | LGP2                  | rs2240009  | 17 | RAB5C              | 0.38 | 6.00E-10 | CEU_local | 0.37 |
| 3757602 | 17 | LGP2                  | rs11079034 | 17 | RAB5C              | 0.37 | 4.00E-10 | CEU_local | 0.37 |
| 3757602 | 17 | LGP2                  | rs7224737  | 17 | RAB5C              | 0.37 | 7.00E-10 | CEU_local | 0.37 |
| 3757602 | 17 | LGP2                  | rs739637   | 17 | RAB5C              | 0.37 | 7.00E-10 | CEU_local | 0.37 |
| 3757602 | 17 | LGP2                  | rs8070446  | 17 | RAB5C              | 0.37 | 4.00E-10 | CEU_local | 0.37 |
| 3757602 | 17 | LGP2                  | rs8074708  | 17 | RAB5C              | 0.37 | 4.00E-10 | CEU_local | 0.37 |
| 3757602 | 17 | LGP2                  | rs9903204  | 17 | RAB5C              | 0.37 | 4.00E-10 | CEU_local | 0.37 |
| 3757602 | 17 | LGP2                  | rs12603330 | 17 | RAB5C              | 0.35 | 1.00E-08 | CEU_local | 0.36 |
| 3757602 | 17 | LGP2                  | rs9915255  | 17 | RAB5C              | 0.37 | 4.00E-10 | CEU_local | 0.32 |
| 2336585 | 1  | LOC653511 ///<br>SCP2 | rs499195   | 1  | ZYG11A             | 0.37 | 5.00E-10 | CEU_local | 0.29 |
| 2336585 | 1  | LOC653511 ///<br>SCP2 | rs512723   | 1  | ZYG11A             | 0.37 | 5.00E-10 | CEU_local | 0.29 |
| 3726569 | 17 | SPATA20               | rs8076470  | 17 | SPATA20            | 0.54 | 6.00E-15 | CEU_local | 0.28 |
| 2946215 | 6  | HIST1H3B              | rs1165176  | 6  | SLC17A1            | 0.32 | 2.00E-08 | CEU_local | 0.27 |
| 2946215 | 6  | HIST1H3B              | rs1165178  | 6  | SLC17A1            | 0.32 | 2.00E-08 | CEU_local | 0.27 |
| 2946215 | 6  | HIST1H3B              | rs1165182  | 6  |                    | 0.32 | 2.00E-08 | CEU_local | 0.27 |
| 2946215 | 6  | HIST1H3B              | rs1185568  | 6  |                    | 0.32 | 2.00E-08 | CEU_local | 0.27 |
| 2946215 | 6  | HIST1H3B              | rs3799352  | 6  | SLC17A1            | 0.32 | 2.00E-08 | CEU_local | 0.27 |
| 2946215 | 6  | HIST1H3B              | rs1165160  | 6  | SLC17A3            | 0.34 | 1.00E-08 | CEU_local | 0.27 |
| 3757602 | 17 | LGP2                  | rs1122326  | 17 | HSPB9              | 0.37 | 4.00E-10 | CEU_local | 0.27 |
| 2336585 | 1  | LOC653511 ///<br>SCP2 | rs10888759 | 1  | SCP2               | 0.37 | 5.00E-10 | CEU_local | 0.27 |

## AJHG, Volume 82

|         |    |                       |            |    |                           |      |          |           |      |
|---------|----|-----------------------|------------|----|---------------------------|------|----------|-----------|------|
| 2336585 | 1  | LOC653511 ///<br>SCP2 | rs1242330  | 1  | SCP2                      | 0.37 | 5.00E-10 | CEU_local | 0.27 |
| 2946215 | 6  | HIST1H3B              | rs1165207  | 6  | SLC17A3                   | 0.32 | 2.00E-08 | CEU_local | 0.27 |
| 2946215 | 6  | HIST1H3B              | rs1184804  | 6  | SLC17A3                   | 0.34 | 2.00E-08 | CEU_local | 0.27 |
| 2946215 | 6  | HIST1H3B              | rs942379   | 6  | SLC17A3                   | 0.32 | 2.00E-08 | CEU_local | 0.27 |
| 2336585 | 1  | LOC653511 ///<br>SCP2 | rs1242317  | 1  | SCP2                      | 0.37 | 5.00E-10 | CEU_local | 0.26 |
| 2946215 | 6  | HIST1H3B              | rs3757131  | 6  | SLC17A1                   | 0.33 | 2.00E-08 | CEU_local | 0.25 |
| 2946215 | 6  | HIST1H3B              | rs1165196  | 6  | SLC17A1                   | 0.32 | 2.00E-08 | CEU_local | 0.25 |
| 2946215 | 6  | HIST1H3B              | rs2762353  | 6  | SLC17A1                   | 0.35 | 6.00E-09 | CEU_local | 0.23 |
| 2576554 | 2  | LOC646836             | rs7424438  | 2  | TUBA4A ///<br>TUBA3D      | 0.47 | 1.00E-12 | CEU_local | 0.21 |
| 2576554 | 2  | LOC646836             | rs6724844  | 2  |                           | 0.56 | 3.00E-16 | CEU_local | 0.21 |
| 2576554 | 2  | LOC646836             | rs7583920  | 2  | TUBA4A ///<br>TUBA3D      | 0.56 | 3.00E-16 | CEU_local | 0.21 |
| 2336585 | 1  | LOC653511 ///<br>SCP2 | rs11585570 | 1  | SCP2                      | 0.47 | 4.00E-13 | CEU_local | 0.20 |
| 2576554 | 2  | LOC646836             | rs6731616  | 2  | TUBA4A ///<br>TUBA3D      | 0.56 | 3.00E-16 | CEU_local | 0.20 |
| 2576554 | 2  | LOC646836             | rs6430826  | 2  |                           | 0.52 | 2.00E-14 | CEU_local | 0.20 |
| 2576554 | 2  | LOC646836             | rs16856655 | 2  | TUBA4A ///<br>TUBA3D      | 0.56 | 3.00E-16 | CEU_local | 0.20 |
| 2336585 | 1  | LOC653511 ///<br>SCP2 | rs6588446  | 1  | SCP2                      | 0.37 | 5.00E-10 | CEU_local | 0.19 |
| 2946215 | 6  | HIST1H3B              | rs198834   | 6  |                           | 0.43 | 1.00E-11 | CEU_local | 0.19 |
| 3726569 | 17 | SPATA20               | rs8076632  | 17 | SPATA20                   | 0.60 | 2.00E-18 | CEU_local | 0.19 |
| 2946215 | 6  | HIST1H3B              | rs10425    | 6  | HIST1H1C                  | 0.50 | 2.00E-13 | CEU_local | 0.19 |
| 3726569 | 17 | SPATA20               | rs6504675  | 17 |                           | 0.54 | 6.00E-15 | CEU_local | 0.18 |
| 2336585 | 1  | LOC653511 ///<br>SCP2 | rs1241980  | 1  | ZYG11B                    | 0.35 | 2.00E-09 | CEU_local | 0.18 |
| 2576554 | 2  | LOC646836             | rs16848770 | 2  | LOC646836                 | 0.49 | 2.00E-13 | CEU_local | 0.18 |
| 2946215 | 6  | HIST1H3B              | rs807214   | 6  |                           | 0.51 | 4.00E-14 | CEU_local | 0.18 |
| 2946215 | 6  | HIST1H3B              | rs1540275  | 6  |                           | 0.60 | 6.00E-18 | CEU_local | 0.17 |
| 2946215 | 6  | HIST1H3B              | rs2213284  | 6  | HIST1H3B ///<br>HIST1H2AB | 0.60 | 6.00E-18 | CEU_local | 0.17 |

AJHG, Volume 82

|         |    |               |            |    |           |      |          |           |      |
|---------|----|---------------|------------|----|-----------|------|----------|-----------|------|
| 2946215 | 6  | HIST1H3B      | rs2230655  | 6  | HIST1H2AB | 0.60 | 5.00E-18 | CEU_local | 0.17 |
| 3726569 | 17 | SPATA20       | rs989128   | 17 | CACNA1G   | 0.57 | 1.00E-16 | CEU_local | 0.17 |
| 2946215 | 6  | HIST1H3B      | rs9467664  | 6  | HIST1H4A  | 0.59 | 2.00E-17 | CEU_local | 0.17 |
| 2946215 | 6  | HIST1H3B      | rs1540276  | 6  |           | 0.60 | 5.00E-18 | CEU_local | 0.16 |
| 2946215 | 6  | HIST1H3B      | rs12346    | 6  | HFE       | 0.53 | 1.00E-14 | CEU_local | 0.16 |
| 2946215 | 6  | HIST1H3B      | rs199750   | 6  | HIST1H1A  | 0.58 | 3.00E-17 | CEU_local | 0.16 |
| 2946215 | 6  | HIST1H3B      | rs199751   | 6  | HIST1H1A  | 0.58 | 3.00E-17 | CEU_local | 0.16 |
| 2946215 | 6  | HIST1H3B      | rs4401650  | 6  |           | 0.60 | 2.00E-17 | CEU_local | 0.16 |
| 2946215 | 6  | HIST1H3B      | rs807212   | 6  |           | 0.60 | 6.00E-18 | CEU_local | 0.16 |
| 2946215 | 6  | HIST1H3B      | rs115810   | 6  | TRIM38    | 0.57 | 1.00E-16 | CEU_local | 0.16 |
| 2946215 | 6  | HIST1H3B      | rs198820   | 6  | HIST1H2BC | 0.43 | 2.00E-11 | CEU_local | 0.16 |
|         |    |               |            |    | ///       |      |          |           |      |
|         |    |               |            |    | HIST1H2AC |      |          |           |      |
| 2946215 | 6  | HIST1H3B      | rs199752   | 6  |           | 0.59 | 3.00E-17 | CEU_local | 0.15 |
| 2946215 | 6  | HIST1H3B      | rs199753   | 6  |           | 0.56 | 7.00E-16 | CEU_local | 0.15 |
| 2336585 | 1  | LOC653511 /// | rs11206043 | 1  | SCP2      | 0.43 | 8.00E-12 | CEU_local | 0.15 |
|         |    | SCP2          |            |    |           |      |          |           |      |
| 2336585 | 1  | LOC653511 /// | rs1672913  | 1  | SCP2      | 0.43 | 7.00E-12 | CEU_local | 0.15 |
|         |    | SCP2          |            |    |           |      |          |           |      |
| 2336585 | 1  | LOC653511 /// | rs7552139  | 1  | ECHDC2    | 0.37 | 5.00E-10 | CEU_local | 0.15 |
|         |    | SCP2          |            |    |           |      |          |           |      |
| 2336585 | 1  | LOC653511 /// | rs1775540  | 1  | SCP2      | 0.46 | 2.00E-12 | CEU_local | 0.14 |
|         |    | SCP2          |            |    |           |      |          |           |      |
| 2946215 | 6  | HIST1H3B      | rs199739   | 6  |           | 0.53 | 1.00E-14 | CEU_local | 0.14 |
| 2946215 | 6  | HIST1H3B      | rs199737   | 6  |           | 0.53 | 2.00E-15 | CEU_local | 0.14 |
| 2946215 | 6  | HIST1H3B      | rs198845   | 6  | HIST1H1T  | 0.42 | 3.00E-11 | CEU_local | 0.13 |
| 2946215 | 6  | HIST1H3B      | rs198848   | 6  | HIST1H1T  | 0.43 | 1.00E-11 | CEU_local | 0.11 |
| 2336585 | 1  | LOC653511 /// | rs511599   | 1  | ECHDC2    | 0.43 | 7.00E-12 | CEU_local | 0.11 |
|         |    | SCP2          |            |    |           |      |          |           |      |
| 2336585 | 1  | LOC653511 /// | rs576891   | 1  | ECHDC2    | 0.43 | 7.00E-12 | CEU_local | 0.11 |
|         |    | SCP2          |            |    |           |      |          |           |      |
| 2946215 | 6  | HIST1H3B      | rs198815   | 6  |           | 0.45 | 2.00E-10 | CEU_local | 0.10 |
| 2576554 | 2  | LOC646836     | rs7591223  | 2  |           | 0.48 | 1.00E-12 | CEU_local | 0.10 |
| 2336585 | 1  | LOC653511 /// | rs480299   | 1  | ZYG11A    | 0.37 | 7.00E-10 | CEU_local | 0.10 |
|         |    | SCP2          |            |    |           |      |          |           |      |

## AJHG, Volume 82

|         |    |                            |            |    |          |      |          |           |      |
|---------|----|----------------------------|------------|----|----------|------|----------|-----------|------|
| 2946215 | 6  | HIST1H3B                   | rs198852   | 6  | HIST1H4C | 0.41 | 2.00E-10 | CEU_local | 0.10 |
| 2946215 | 6  | HIST1H3B                   | rs198853   | 6  | HIST1H4C | 0.54 | 1.00E-15 | CEU_local | 0.09 |
| 2946215 | 6  | HIST1H3B                   | rs6905614  | 6  |          | 0.36 | 2.00E-09 | CEU_local | 0.06 |
| 3243262 | 10 | HSD17B7P2 ///<br>LOC728924 | rs1535273  | 10 |          | 0.37 | 2.00E-09 | CEU_local | 0.05 |
| 3243262 | 10 | HSD17B7P2 ///<br>LOC728924 | rs2295647  | 10 |          | 0.35 | 8.00E-09 | CEU_local | 0.05 |
| 3243262 | 10 | HSD17B7P2 ///<br>LOC728924 | rs7906186  | 10 |          | 0.34 | 1.00E-08 | CEU_local | 0.05 |
| 3243262 | 10 | HSD17B7P2 ///<br>LOC728924 | rs1535272  | 10 |          | 0.37 | 2.00E-09 | CEU_local | 0.05 |
| 2336585 | 1  | LOC653511 ///<br>SCP2      | rs1242198  | 1  | ZYG11A   | 0.39 | 1.00E-10 | CEU_local | 0.03 |
| 3243262 | 10 | HSD17B7P2 ///<br>LOC728924 | rs10740945 | 10 |          | 0.40 | 9.00E-10 | CEU_local | 0.03 |
| 2946215 | 6  | HIST1H3B                   | rs2051541  | 6  |          | 0.34 | 1.00E-08 | CEU_local | 0.03 |
| 2946215 | 6  | HIST1H3B                   | rs7749342  | 6  | SLC17A2  | 0.37 | 7.00E-10 | CEU_local | 0.03 |
| 2946215 | 6  | HIST1H3B                   | rs9393676  | 6  |          | 0.34 | 1.00E-08 | CEU_local | 0.03 |
| 3243262 | 10 | HSD17B7P2 ///<br>LOC728924 | rs1321963  | 10 |          | 0.37 | 2.00E-09 | CEU_local | 0.02 |
| 3243262 | 10 | HSD17B7P2 ///<br>LOC728924 | rs1998160  | 10 |          | 0.37 | 2.00E-09 | CEU_local | 0.02 |
| 3243262 | 10 | HSD17B7P2 ///<br>LOC728924 | rs4141861  | 10 |          | 0.37 | 2.00E-09 | CEU_local | 0.02 |
| 3243262 | 10 | HSD17B7P2 ///<br>LOC728924 | rs9418273  | 10 |          | 0.37 | 2.00E-09 | CEU_local | 0.02 |
| 2336585 | 1  | LOC653511 ///<br>SCP2      | rs475969   | 1  |          | 0.35 | 2.00E-09 | CEU_local | 0.02 |
| 3243262 | 10 | HSD17B7P2 ///<br>LOC728924 | rs2504128  | 10 |          | 0.38 | 6.00E-10 | CEU_local | 0.02 |
| 2946215 | 6  | HIST1H3B                   | rs199726   | 6  |          | 0.54 | 6.00E-15 | CEU_local | 0.02 |
| 3243262 | 10 | HSD17B7P2 ///<br>LOC728924 | rs2474582  | 10 |          | 0.39 | 3.00E-10 | CEU_local | 0.02 |
| 2946215 | 6  | HIST1H3B                   | rs9295678  | 6  |          | 0.33 | 1.00E-08 | CEU_local | 0.02 |
| 2336585 | 1  | LOC653511 ///<br>SCP2      | rs514881   | 1  | ZYG11A   | 0.35 | 2.00E-09 | CEU_local | 0.02 |

## AJHG, Volume 82

|         |    |                            |            |    |           |      |          |           |      |
|---------|----|----------------------------|------------|----|-----------|------|----------|-----------|------|
| 3243262 | 10 | HSD17B7P2 ///<br>LOC728924 | rs766362   | 10 | ZNF25     | 0.41 | 5.00E-10 | CEU_local | 0.02 |
| 3243262 | 10 | HSD17B7P2 ///<br>LOC728924 | rs2472153  | 10 | ZNF33A    | 0.43 | 1.00E-09 | CEU_local | 0.02 |
| 3243262 | 10 | HSD17B7P2 ///<br>LOC728924 | rs1208578  | 10 |           | 0.39 | 3.00E-10 | CEU_local | 0.02 |
| 3243262 | 10 | HSD17B7P2 ///<br>LOC728924 | rs2472159  | 10 | ZNF33A    | 0.39 | 3.00E-10 | CEU_local | 0.02 |
| 3243262 | 10 | HSD17B7P2 ///<br>LOC728924 | rs677565   | 10 |           | 0.39 | 3.00E-10 | CEU_local | 0.02 |
| 2946215 | 6  | HIST1H3B                   | rs199736   | 6  |           | 0.54 | 1.00E-15 | CEU_local | 0.02 |
| 2946215 | 6  | HIST1H3B                   | rs442601   | 6  |           | 0.54 | 1.00E-15 | CEU_local | 0.02 |
| 3243262 | 10 | HSD17B7P2 ///<br>LOC728924 | rs176831   | 10 |           | 0.40 | 3.00E-10 | CEU_local | 0.02 |
| 2946215 | 6  | HIST1H3B                   | rs129129   | 6  |           | 0.61 | 3.00E-16 | CEU_local | 0.02 |
| 3243262 | 10 | HSD17B7P2 ///<br>LOC728924 | rs7895468  | 10 | ZNF25     | 0.38 | 9.00E-10 | CEU_local | 0.01 |
| 2336585 | 1  | LOC653511 ///<br>SCP2      | rs567880   | 1  | ZYG11A    | 0.43 | 9.00E-12 | CEU_local | 0.01 |
| 3243262 | 10 | HSD17B7P2 ///<br>LOC728924 | rs176832   | 10 |           | 0.39 | 3.00E-10 | CEU_local | 0.01 |
| 3243262 | 10 | HSD17B7P2 ///<br>LOC728924 | rs2472170  | 10 | LOC340947 | 0.39 | 3.00E-10 | CEU_local | 0.01 |
| 2336585 | 1  | LOC653511 ///<br>SCP2      | rs481440   | 1  | ZYG11A    | 0.43 | 7.00E-12 | CEU_local | 0.01 |
| 3243262 | 10 | HSD17B7P2 ///<br>LOC728924 | rs2504137  | 10 |           | 0.39 | 5.00E-10 | CEU_local | 0.01 |
| 3243262 | 10 | HSD17B7P2 ///<br>LOC728924 | rs2224371  | 10 |           | 0.37 | 2.00E-09 | CEU_local | 0.01 |
| 3243262 | 10 | HSD17B7P2 ///<br>LOC728924 | rs4245001  | 10 |           | 0.37 | 2.00E-09 | CEU_local | 0.01 |
| 3243262 | 10 | HSD17B7P2 ///<br>LOC728924 | rs16937569 | 10 |           | 0.34 | 1.00E-08 | CEU_local | 0.01 |
| 2576554 | 2  | LOC646836                  | rs7572535  | 2  |           | 0.48 | 4.00E-13 | CEU_local | 0.01 |
| 3243262 | 10 | HSD17B7P2 ///<br>LOC728924 | rs2384732  | 10 |           | 0.34 | 8.00E-09 | CEU_local | 0.01 |

## AJHG, Volume 82

|         |    |                            |            |    |                           |      |          |           |      |
|---------|----|----------------------------|------------|----|---------------------------|------|----------|-----------|------|
| 3243262 | 10 | HSD17B7P2 ///<br>LOC728924 | rs10508859 | 10 |                           | 0.34 | 1.00E-08 | CEU_local | 0.01 |
| 3243262 | 10 | HSD17B7P2 ///<br>LOC728924 | rs10734027 | 10 |                           | 0.34 | 1.00E-08 | CEU_local | 0.01 |
| 3243262 | 10 | HSD17B7P2 ///<br>LOC728924 | rs200909   | 10 |                           | 0.39 | 3.00E-10 | CEU_local | 0.01 |
| 3243262 | 10 | HSD17B7P2 ///<br>LOC728924 | rs4934878  | 10 |                           | 0.34 | 8.00E-09 | CEU_local | 0.00 |
| 3243262 | 10 | HSD17B7P2 ///<br>LOC728924 | rs200907   | 10 |                           | 0.41 | 2.00E-10 | CEU_local | 0.00 |
| 2336585 | 1  | LOC653511 ///<br>SCP2      | rs551591   | 1  |                           | 0.32 | 1.00E-08 | CEU_local | 0.00 |
| 3243262 | 10 | HSD17B7P2 ///<br>LOC728924 | rs2472160  | 10 | ZNF33A                    | 0.34 | 1.00E-08 | CEU_local | 0.00 |
| 3243262 | 10 | HSD17B7P2 ///<br>LOC728924 | rs1740753  | 10 |                           | 0.42 | 7.00E-11 | CEU_local | 0.00 |
| 2946215 | 6  | HIST1H3B                   | rs7756117  | 6  | HIST1H3C                  | 0.60 | 2.00E-17 | CEU_local | 0.00 |
| 3243262 | 10 | HSD17B7P2 ///<br>LOC728924 | rs12413083 | 10 | ZNF33A                    | 0.34 | 1.00E-08 | CEU_local | 0.00 |
| 3243262 | 10 | HSD17B7P2 ///<br>LOC728924 | rs9340346  | 10 |                           | 0.46 | 3.00E-12 | CEU_local | 0.00 |
| 2946215 | 6  | HIST1H3B                   | rs2032447  | 6  | HIST1H3C ///<br>HIST1H2BB | 0.60 | 5.00E-17 | CEU_local | 0.00 |
| 2946215 | 6  | HIST1H3B                   | rs9358901  | 6  |                           | 0.59 | 2.00E-17 | CEU_local | 0.00 |
| 2946215 | 6  | HIST1H3B                   | rs9393672  | 6  |                           | 0.32 | 2.00E-08 | CEU_local | 0.00 |
| 3243262 | 10 | HSD17B7P2 ///<br>LOC728924 | rs7082875  | 10 |                           | 0.46 | 3.00E-12 | CEU_local | 0.00 |
| 3243262 | 10 | HSD17B7P2 ///<br>LOC728924 | rs10508861 | 10 |                           | 0.37 | 2.00E-09 | CEU_local | 0.00 |
| 3243262 | 10 | HSD17B7P2 ///<br>LOC728924 | rs12243792 | 10 |                           | 0.37 | 2.00E-09 | CEU_local | 0.00 |
| 3243262 | 10 | HSD17B7P2 ///<br>LOC728924 | rs10827807 | 10 |                           | 0.34 | 1.00E-08 | CEU_local | 0.00 |
| 3243262 | 10 | HSD17B7P2 ///<br>LOC728924 | rs2996607  | 10 |                           | 0.46 | 3.00E-12 | CEU_local | 0.00 |
| 3243262 | 10 | HSD17B7P2 ///              | rs10508864 | 10 |                           | 0.36 | 2.00E-09 | CEU_local | 0.00 |

## AJHG, Volume 82

|         |    |                            |            |    |          |      |          |             |      |
|---------|----|----------------------------|------------|----|----------|------|----------|-------------|------|
|         |    | LOC728924                  |            |    |          |      |          |             |      |
| 3243262 | 10 | HSD17B7P2 ///<br>LOC728924 | rs289642   | 10 |          | 0.34 | 1.00E-08 | CEU_local   | 0.00 |
| 3243262 | 10 | HSD17B7P2 ///<br>LOC728924 | rs6482048  | 10 |          | 0.34 | 1.00E-08 | CEU_local   | 0.00 |
| 3243262 | 10 | HSD17B7P2 ///<br>LOC728924 | rs911176   | 10 |          | 0.34 | 1.00E-08 | CEU_local   | 0.00 |
| 3243262 | 10 | HSD17B7P2 ///<br>LOC728924 | rs176890   | 10 | ZNF37A   | 0.43 | 3.00E-11 | CEU_local   | 0.00 |
| 3243262 | 10 | HSD17B7P2 ///<br>LOC728924 | rs2804669  | 10 |          | 0.46 | 3.00E-12 | CEU_local   | 0.00 |
| 3243262 | 10 | HSD17B7P2 ///<br>LOC728924 | rs12265979 | 10 |          | 0.36 | 2.00E-09 | CEU_local   | 0.00 |
| 3243262 | 10 | HSD17B7P2 ///<br>LOC728924 | rs2997786  | 10 |          | 0.39 | 7.00E-10 | CEU_local   | 0.00 |
| 2336585 | 1  | LOC653511 ///<br>SCP2      | rs7548389  | 1  | SCP2     | 0.39 | 1.00E-10 | CEU_local   | 0.00 |
| 3243262 | 10 | HSD17B7P2 ///<br>LOC728924 | rs1854562  | 10 |          | 0.43 | 3.00E-11 | CEU_local   | 0.00 |
| 3243262 | 10 | HSD17B7P2 ///<br>LOC728924 | rs2754369  | 10 |          | 0.41 | 9.00E-11 | CEU_local   | 0.00 |
| 3243262 | 10 | HSD17B7P2 ///<br>LOC728924 | rs7088655  | 10 |          | 0.43 | 3.00E-11 | CEU_local   | 0.00 |
| 2832081 | 5  | ZMAT2                      | rs1331974  | 9  | APBA1    | 0.34 | 2.00E-08 | YRI_distant | NA   |
| 2946215 | 6  | HIST1H3B                   | rs12652658 | 5  | WDR70    | 0.34 | 2.00E-08 | YRI_distant | NA   |
| 3150844 | 8  | SNTB1                      | rs2397199  | 6  |          | 0.40 | 6.00E-09 | YRI_distant | NA   |
| 3150844 | 8  | SNTB1                      | rs2745746  | 6  |          | 0.32 | 2.00E-08 | YRI_distant | NA   |
| 3150844 | 8  | SNTB1                      | rs2843539  | 6  |          | 0.33 | 2.00E-08 | YRI_distant | NA   |
| 3150844 | 8  | SNTB1                      | rs2843541  | 6  |          | 0.33 | 9.00E-09 | YRI_distant | NA   |
| 3150844 | 8  | SNTB1                      | rs6911711  | 6  |          | 0.32 | 1.00E-08 | YRI_distant | NA   |
| 3757602 | 17 | LGP2                       | rs1216783  | 1  |          | 0.32 | 9.00E-09 | YRI_distant | NA   |
| 2946215 | 6  | HIST1H3B                   | rs7034728  | 9  | C9orf106 | 0.34 | 7.00E-09 | YRI_distant | 0.45 |
| 2946215 | 6  | HIST1H3B                   | rs12152831 | 5  | WDR70    | 0.38 | 8.00E-10 | YRI_distant | 0.38 |
| 3820727 | 19 | QTRT1                      | rs858524   | 17 | FXR2     | 0.36 | 1.00E-08 | YRI_distant | 0.34 |
| 2757347 | 4  | TMEM129                    | rs2823663  | 21 | C21orf34 | 0.34 | 5.00E-09 | YRI_distant | 0.34 |

|         |    |          |            |    |          |      |          |             |      |
|---------|----|----------|------------|----|----------|------|----------|-------------|------|
| 2757347 | 4  | TMEM129  | rs2823665  | 21 | C21orf34 | 0.34 | 5.00E-09 | YRI_distant | 0.34 |
| 2757347 | 4  | TMEM129  | rs2823666  | 21 | C21orf34 | 0.34 | 5.00E-09 | YRI_distant | 0.34 |
| 3766373 | 17 | FTSJ3    | rs10018879 | 4  | FLJ31033 | 0.34 | 3.00E-09 | YRI_distant | 0.31 |
| 2946215 | 6  | HIST1H3B | rs2088077  | 5  | WDR70    | 0.37 | 8.00E-10 | YRI_distant | 0.31 |
| 3840058 | 19 | PPP2R1A  | rs10796820 | 11 |          | 0.32 | 2.00E-08 | YRI_distant | 0.24 |
| 3243708 | 10 | BMS1L    | rs7934469  | 11 |          | 0.32 | 1.00E-08 | YRI_distant | 0.22 |
| 3150844 | 8  | SNTB1    | rs2745747  | 6  |          | 0.33 | 9.00E-09 | YRI_distant | 0.22 |
| 3597977 | 15 | TRIP4    | rs825081   | 12 | MYBPC1   | 0.34 | 4.00E-09 | YRI_distant | 0.21 |
| 3597977 | 15 | TRIP4    | rs1697485  | 12 | MYBPC1   | 0.31 | 2.00E-08 | YRI_distant | 0.21 |
| 3597977 | 15 | TRIP4    | rs1697486  | 12 | MYBPC1   | 0.31 | 2.00E-08 | YRI_distant | 0.21 |
| 3373724 | 11 | SSRP1    | rs3950981  | 2  |          | 0.32 | 2.00E-08 | YRI_distant | 0.20 |
| 3150844 | 8  | SNTB1    | rs4299832  | 6  |          | 0.35 | 4.00E-09 | YRI_distant | 0.20 |
| 3774635 | 17 | FASN     | rs16946    | 1  | ABCD3    | 0.33 | 2.00E-08 | YRI_distant | 0.20 |
| 3150844 | 8  | SNTB1    | rs4341007  | 6  |          | 0.36 | 1.00E-09 | YRI_distant | 0.19 |
| 2946215 | 6  | HIST1H3B | rs7095198  | 10 |          | 0.32 | 1.00E-08 | YRI_distant | 0.19 |
| 3774635 | 17 | FASN     | rs2296382  | 1  | ABCD3    | 0.33 | 2.00E-08 | YRI_distant | 0.19 |
| 3528115 | 14 | KIAA0737 | rs7208703  | 17 |          | 0.33 | 6.00E-09 | YRI_distant | 0.18 |
| 3528115 | 14 | KIAA0737 | rs4883992  | 13 | TBC1D4   | 0.32 | 7.00E-09 | YRI_distant | 0.17 |
| 3644057 | 16 | MAPK8IP3 | rs13357936 | 5  |          | 0.31 | 2.00E-08 | YRI_distant | 0.17 |
| 3764738 | 17 | FAM33A   | rs1514389  | 4  | LNX1     | 0.32 | 1.00E-08 | YRI_distant | 0.16 |
| 3133345 | 8  | SLC20A2  | rs10778557 | 12 | BTBD11   | 0.35 | 1.00E-08 | YRI_distant | 0.16 |
| 2676009 | 3  | TWF2     | rs1196137  | 2  | PPP1R1C  | 0.31 | 2.00E-08 | YRI_distant | 0.15 |
| 3528115 | 14 | KIAA0737 | rs2290861  | 17 | RSAD1    | 0.33 | 6.00E-09 | YRI_distant | 0.15 |
| 3150844 | 8  | SNTB1    | rs2009726  | 6  |          | 0.33 | 9.00E-09 | YRI_distant | 0.15 |
| 3430552 | 12 | PWP1     | rs11077447 | 17 | MAP2K6   | 0.31 | 2.00E-08 | YRI_distant | 0.14 |
| 3528115 | 14 | KIAA0737 | rs2290862  | 17 | RSAD1    | 0.41 | 3.00E-11 | YRI_distant | 0.13 |
| 3138414 | 8  | ARMC1    | rs17043258 | 2  |          | 0.33 | 2.00E-08 | YRI_distant | 0.13 |
| 3138414 | 8  | ARMC1    | rs328516   | 2  |          | 0.33 | 1.00E-08 | YRI_distant | 0.12 |
| 3430552 | 12 | PWP1     | rs2365493  | 17 | MAP2K6   | 0.32 | 2.00E-08 | YRI_distant | 0.12 |
| 3528115 | 14 | KIAA0737 | rs2826692  | 21 | NCAM2    | 0.31 | 2.00E-08 | YRI_distant | 0.12 |
| 3528115 | 14 | KIAA0737 | rs2826706  | 21 | NCAM2    | 0.31 | 2.00E-08 | YRI_distant | 0.11 |
| 2676009 | 3  | TWF2     | rs10497591 | 2  | PPP1R1C  | 0.33 | 4.00E-09 | YRI_distant | 0.10 |
| 2676009 | 3  | TWF2     | rs16822446 | 2  | PPP1R1C  | 0.33 | 4.00E-09 | YRI_distant | 0.10 |



## AJHG, Volume 82

|         |    |                            |            |    |           |      |          |             |      |
|---------|----|----------------------------|------------|----|-----------|------|----------|-------------|------|
| 2676009 | 3  | TWF2                       | rs7588817  | 2  | PPP1R1C   | 0.33 | 4.00E-09 | YRI_distant | 0.10 |
| 3119945 | 8  | GRINA                      | rs2170824  | 16 | LOC729847 | 0.34 | 6.00E-09 | YRI_distant | 0.10 |
| 2676009 | 3  | TWF2                       | rs16822397 | 2  | PPP1R1C   | 0.33 | 7.00E-09 | YRI_distant | 0.10 |
| 3119945 | 8  | GRINA                      | rs8059443  | 16 | LOC729847 | 0.35 | 2.00E-09 | YRI_distant | 0.10 |
| 3119945 | 8  | GRINA                      | rs8062108  | 16 | LOC729847 | 0.35 | 2.00E-09 | YRI_distant | 0.10 |
| 2696379 | 3  | ANAPC13                    | rs6433829  | 2  |           | 0.38 | 3.00E-09 | YRI_distant | 0.09 |
| 3119945 | 8  | GRINA                      | rs7187760  | 16 | LOC729847 | 0.35 | 3.00E-09 | YRI_distant | 0.09 |
| 3373724 | 11 | SSRP1                      | rs2337094  | 18 |           | 0.34 | 7.00E-09 | YRI_distant | 0.09 |
| 3131844 | 8  | LSM1                       | rs16902016 | 5  |           | 0.31 | 2.00E-08 | YRI_distant | 0.08 |
| 3755862 | 17 | IKZF3                      | rs791135   | 10 | SORCS3    | 0.31 | 2.00E-08 | YRI_distant | 0.08 |
| 3755862 | 17 | IKZF3                      | rs791134   | 10 | SORCS3    | 0.31 | 2.00E-08 | YRI_distant | 0.08 |
| 3088544 | 8  | ATP6V1B2                   | rs10438088 | 14 |           | 0.32 | 2.00E-08 | YRI_distant | 0.07 |
| 2924898 | 6  | RNF146                     | rs2545445  | 8  |           | 0.34 | 9.00E-09 | YRI_distant | 0.07 |
| 2946215 | 6  | HIST1H3B                   | rs17725839 | 16 | MBTPS1    | 0.38 | 6.00E-10 | YRI_distant | 0.07 |
| 3528115 | 14 | KIAA0737                   | rs17325351 | 13 | TBC1D4    | 0.31 | 2.00E-08 | YRI_distant | 0.06 |
| 3597977 | 15 | TRIP4                      | rs4955166  | 3  |           | 0.32 | 1.00E-08 | YRI_distant | 0.06 |
| 3755862 | 17 | IKZF3                      | rs6992174  | 8  | ST18      | 0.32 | 1.00E-08 | YRI_distant | 0.06 |
| 3755862 | 17 | IKZF3                      | rs6992299  | 8  | ST18      | 0.32 | 1.00E-08 | YRI_distant | 0.06 |
| 3726569 | 17 | SPATA20                    | rs7934970  | 11 |           | 0.32 | 2.00E-08 | YRI_distant | 0.06 |
| 2946215 | 6  | HIST1H3B                   | rs11879090 | 19 | BCKDHA    | 0.35 | 4.00E-09 | YRI_distant | 0.06 |
| 3757602 | 17 | LGP2                       | rs6460843  | 7  | THSD7A    | 0.32 | 1.00E-08 | YRI_distant | 0.06 |
| 3840058 | 19 | PPP2R1A                    | rs4863771  | 4  | SLC7A11   | 0.34 | 5.00E-09 | YRI_distant | 0.05 |
| 2461891 | 1  | B3GALNT2                   | rs10990879 | 9  |           | 0.35 | 2.00E-08 | YRI_distant | 0.05 |
| 3766373 | 17 | FTSJ3                      | rs2662424  | 5  |           | 0.33 | 5.00E-09 | YRI_distant | 0.05 |
| 3150844 | 8  | SNTB1                      | rs2240200  | 4  | SORCS2    | 0.38 | 1.00E-08 | YRI_distant | 0.05 |
| 3269587 | 10 | C10orf137 ///<br>LOC728011 | rs16941330 | 16 |           | 0.33 | 5.00E-09 | YRI_distant | 0.05 |
| 3528115 | 14 | KIAA0737                   | rs17441683 | 1  | CACNA1E   | 0.31 | 2.00E-08 | YRI_distant | 0.04 |
| 2830861 | 5  | EGR1                       | rs16962687 | 15 |           | 0.31 | 2.00E-08 | YRI_distant | 0.04 |
| 2830861 | 5  | EGR1                       | rs16962690 | 15 |           | 0.31 | 2.00E-08 | YRI_distant | 0.04 |
| 2830861 | 5  | EGR1                       | rs16962694 | 15 |           | 0.31 | 2.00E-08 | YRI_distant | 0.04 |
| 2830861 | 5  | EGR1                       | rs7182851  | 15 |           | 0.31 | 2.00E-08 | YRI_distant | 0.04 |
| 2830861 | 5  | EGR1                       | rs8033054  | 15 |           | 0.31 | 2.00E-08 | YRI_distant | 0.04 |

## AJHG, Volume 82

|         |    |                                        |            |    |                        |      |          |             |      |
|---------|----|----------------------------------------|------------|----|------------------------|------|----------|-------------|------|
| 2830861 | 5  | EGR1                                   | rs962813   | 11 |                        | 0.32 | 1.00E-08 | YRI_distant | 0.04 |
| 3260937 | 10 | PEO1                                   | rs7014670  | 8  | LOC727725              | 0.32 | 9.00E-09 | YRI_distant | 0.04 |
| 3840058 | 19 | PPP2R1A                                | rs11100834 | 4  | SLC7A11                | 0.33 | 6.00E-09 | YRI_distant | 0.04 |
| 3850278 | 19 | TYK2                                   | rs7759538  | 6  | LOC729658 ///<br>PACRG | 0.34 | 2.00E-08 | YRI_distant | 0.04 |
| 2946215 | 6  | HIST1H3B                               | rs7211329  | 17 | LYK5                   | 0.32 | 2.00E-08 | YRI_distant | 0.04 |
| 3489708 | 13 | DLEU1 ///<br>FLJ31945 ///<br>LOC647154 | rs6669720  | 1  | CNIH3                  | 0.31 | 2.00E-08 | YRI_distant | 0.04 |
| 2946215 | 6  | HIST1H3B                               | rs7171280  | 15 |                        | 0.40 | 9.00E-11 | YRI_distant | 0.03 |
| 2946215 | 6  | HIST1H3B                               | rs10165336 | 2  | FBXO36                 | 0.41 | 3.00E-10 | YRI_distant | 0.03 |
| 2413578 | 1  | TMEM59                                 | rs6969432  | 7  | IQCE                   | 0.33 | 1.00E-08 | YRI_distant | 0.03 |
| 3726569 | 17 | SPATA20                                | rs2611512  | 10 |                        | 0.33 | 6.00E-09 | YRI_distant | 0.03 |
| 3726569 | 17 | SPATA20                                | rs2843560  | 10 |                        | 0.33 | 6.00E-09 | YRI_distant | 0.03 |
| 2946215 | 6  | HIST1H3B                               | rs10171278 | 2  | DNER                   | 0.36 | 1.00E-09 | YRI_distant | 0.03 |
| 2946215 | 6  | HIST1H3B                               | rs11917917 | 3  | MYRIP                  | 0.31 | 2.00E-08 | YRI_distant | 0.03 |
| 3528115 | 14 | KIAA0737                               | rs12346129 | 9  | AKAP2 ///<br>PALM2     | 0.31 | 2.00E-08 | YRI_distant | 0.03 |
| 3528115 | 14 | KIAA0737                               | rs16971572 | 16 |                        | 0.32 | 1.00E-08 | YRI_distant | 0.03 |
| 3130161 | 8  | GSR                                    | rs11016107 | 10 |                        | 0.33 | 9.00E-09 | YRI_distant | 0.03 |
| 2946215 | 6  | HIST1H3B                               | rs6474070  | 8  |                        | 0.32 | 2.00E-08 | YRI_distant | 0.03 |
| 2676009 | 3  | TWF2                                   | rs12723766 | 1  |                        | 0.31 | 2.00E-08 | YRI_distant | 0.02 |
| 3850278 | 19 | TYK2                                   | rs7046031  | 9  |                        | 0.33 | 2.00E-08 | YRI_distant | 0.02 |
| 3557666 | 14 | JPH4                                   | rs1579095  | 9  |                        | 0.31 | 2.00E-08 | YRI_distant | 0.02 |
| 2946215 | 6  | HIST1H3B                               | rs17031697 | 3  | CADPS                  | 0.32 | 2.00E-08 | YRI_distant | 0.02 |
| 2757347 | 4  | TMEM129                                | rs12436216 | 14 |                        | 0.33 | 1.00E-08 | YRI_distant | 0.02 |
| 3816611 | 19 | THOP1                                  | rs9683082  | 3  |                        | 0.33 | 1.00E-08 | YRI_distant | 0.02 |
| 3624362 | 15 | LEO1                                   | rs12416292 | 10 |                        | 0.31 | 2.00E-08 | YRI_distant | 0.02 |
| 2560141 | 2  | MRPL53                                 | rs13117343 | 4  |                        | 0.31 | 2.00E-08 | YRI_distant | 0.02 |
| 2342576 | 1  | ACADM                                  | rs2139036  | 2  |                        | 0.35 | 1.00E-09 | YRI_distant | 0.01 |
| 2342576 | 1  | ACADM                                  | rs9677637  | 2  |                        | 0.35 | 1.00E-09 | YRI_distant | 0.01 |
| 2405893 | 1  | C1orf212                               | rs17094375 | 14 | C14orf37               | 0.35 | 2.00E-09 | YRI_distant | 0.01 |
| 2830861 | 5  | EGR1                                   | rs4770103  | 13 |                        | 0.32 | 2.00E-08 | YRI_distant | 0.01 |
| 3681705 | 16 | RRN3                                   | rs4847370  | 1  |                        | 0.37 | 5.00E-09 | YRI_distant | 0.00 |

## AJHG, Volume 82

|         |    |           |            |    |                      |      |          |             |      |
|---------|----|-----------|------------|----|----------------------|------|----------|-------------|------|
| 3528115 | 14 | KIAA0737  | rs11924580 | 3  |                      | 0.32 | 1.00E-08 | YRI_distant | 0.00 |
| 3528115 | 14 | KIAA0737  | rs11924138 | 3  |                      | 0.32 | 2.00E-08 | YRI_distant | 0.00 |
| 2946215 | 6  | HIST1H3B  | rs17182166 | 2  | ACVR1                | 0.32 | 1.00E-08 | YRI_distant | 0.00 |
| 2830861 | 5  | EGR1      | rs4770102  | 13 |                      | 0.32 | 2.00E-08 | YRI_distant | 0.00 |
| 3528115 | 14 | KIAA0737  | rs11916357 | 3  |                      | 0.32 | 2.00E-08 | YRI_distant | 0.00 |
| 3528115 | 14 | KIAA0737  | rs918757   | 16 |                      | 0.33 | 2.00E-08 | YRI_distant | 0.00 |
| 3150844 | 8  | SNTB1     | rs375396   | 5  | SLC36A3              | 0.34 | 4.00E-09 | YRI_distant | 0.00 |
| 3675430 | 16 | RPUSD1    | rs1619436  | 10 |                      | 0.31 | 2.00E-08 | YRI_distant | 0.00 |
| 3528115 | 14 | KIAA0737  | rs918754   | 16 |                      | 0.34 | 3.00E-09 | YRI_distant | 0.00 |
| 3181240 | 9  | TMOD1     | rs10408112 | 19 | RHPN2                | 0.33 | 1.00E-08 | YRI_distant | 0.00 |
| 2945645 | 6  | TTRAP     | rs6891095  | 5  | IL7R                 | 0.32 | 1.00E-08 | YRI_distant | 0.00 |
| 3850278 | 19 | TYK2      | rs10811869 | 9  |                      | 0.34 | 9.00E-09 | YRI_distant | 0.00 |
| 3701384 | 16 | C16orf61  | rs1027531  | 3  |                      | 0.33 | 1.00E-08 | YRI_distant | 0.00 |
| 3597977 | 15 | TRIP4     | rs1153183  | 12 |                      | 0.35 | 2.00E-09 | YRI_distant | 0.00 |
| 3766373 | 17 | FTSJ3     | rs7305015  | 12 |                      | 0.35 | 5.00E-09 | YRI_distant | 0.00 |
| 3850278 | 19 | TYK2      | rs10738653 | 9  |                      | 0.32 | 2.00E-08 | YRI_distant | 0.00 |
| 3138414 | 8  | ARMC1     | rs1406749  | 2  |                      | 0.34 | 2.00E-08 | YRI_distant | 0.00 |
| 3096368 | 8  | HOOK3     | rs17456562 | 10 |                      | 0.32 | 2.00E-08 | YRI_distant | 0.00 |
| 2576554 | 2  | LOC646836 | rs9287523  | 2  |                      | 0.48 | 7.00E-14 | YRI_local   | NA   |
| 2946215 | 6  | HIST1H3B  | rs6922788  | 6  |                      | 0.37 | 1.00E-09 | YRI_local   | NA   |
| 2576554 | 2  | LOC646836 | rs6727153  | 2  | LOC646836            | 0.52 | 5.00E-15 | YRI_local   | 0.36 |
| 2576554 | 2  | LOC646836 | rs7565383  | 2  | LOC646836            | 0.52 | 3.00E-15 | YRI_local   | 0.36 |
| 2927722 | 6  | HEBP2     | rs6919872  | 6  | HEBP2                | 0.59 | 9.00E-18 | YRI_local   | 0.29 |
| 3726569 | 17 | SPATA20   | rs8076470  | 17 | SPATA20              | 0.34 | 5.00E-09 | YRI_local   | 0.28 |
| 2927722 | 6  | HEBP2     | rs6570232  | 6  | HEBP2                | 0.58 | 1.00E-17 | YRI_local   | 0.27 |
| 2927722 | 6  | HEBP2     | rs7752490  | 6  |                      | 0.35 | 8.00E-09 | YRI_local   | 0.26 |
| 2927722 | 6  | HEBP2     | rs17053774 | 6  |                      | 0.56 | 7.00E-17 | YRI_local   | 0.24 |
| 2927722 | 6  | HEBP2     | rs9484152  | 6  |                      | 0.55 | 3.00E-16 | YRI_local   | 0.22 |
| 2927722 | 6  | HEBP2     | rs9495064  | 6  |                      | 0.55 | 3.00E-16 | YRI_local   | 0.22 |
| 2576554 | 2  | LOC646836 | rs7424438  | 2  | TUBA4A ///<br>TUBA3D | 0.63 | 4.00E-20 | YRI_local   | 0.21 |
| 2927722 | 6  | HEBP2     | rs9495054  | 6  |                      | 0.48 | 3.00E-12 | YRI_local   | 0.21 |
| 2927722 | 6  | HEBP2     | rs9495065  | 6  |                      | 0.49 | 5.00E-13 | YRI_local   | 0.21 |

## AJHG, Volume 82

|         |    |           |            |    |                               |      |          |           |      |
|---------|----|-----------|------------|----|-------------------------------|------|----------|-----------|------|
| 2576554 | 2  | LOC646836 | rs6724844  | 2  |                               | 0.61 | 5.00E-18 | YRI_local | 0.21 |
| 2576554 | 2  | LOC646836 | rs7583920  | 2  | TUBA4A ///<br>TUBA3D          | 0.64 | 6.00E-19 | YRI_local | 0.21 |
| 2927722 | 6  | HEBP2     | rs9495052  | 6  |                               | 0.33 | 9.00E-09 | YRI_local | 0.20 |
| 2927722 | 6  | HEBP2     | rs9495066  | 6  |                               | 0.47 | 2.00E-13 | YRI_local | 0.20 |
| 2576554 | 2  | LOC646836 | rs6731616  | 2  | TUBA4A ///<br>TUBA3D          | 0.61 | 3.00E-19 | YRI_local | 0.20 |
| 2576554 | 2  | LOC646836 | rs6430826  | 2  |                               | 0.58 | 1.00E-17 | YRI_local | 0.20 |
| 2576554 | 2  | LOC646836 | rs16856655 | 2  | TUBA4A ///<br>TUBA3D          | 0.63 | 5.00E-20 | YRI_local | 0.20 |
| 2927722 | 6  | HEBP2     | rs2076272  | 6  |                               | 0.49 | 4.00E-14 | YRI_local | 0.20 |
| 2927722 | 6  | HEBP2     | rs3756890  | 6  | LOC645371 ///<br>HEBP2        | 0.42 | 2.00E-11 | YRI_local | 0.19 |
| 2927722 | 6  | HEBP2     | rs9495063  | 6  |                               | 0.44 | 2.00E-12 | YRI_local | 0.19 |
| 3726569 | 17 | SPATA20   | rs8076632  | 17 | SPATA20                       | 0.48 | 5.00E-14 | YRI_local | 0.19 |
| 2927722 | 6  | HEBP2     | rs7765991  | 6  |                               | 0.46 | 3.00E-12 | YRI_local | 0.19 |
| 3726569 | 17 | SPATA20   | rs6504675  | 17 |                               | 0.41 | 4.00E-11 | YRI_local | 0.18 |
| 2927722 | 6  | HEBP2     | rs9495070  | 6  |                               | 0.38 | 2.00E-10 | YRI_local | 0.18 |
| 2576554 | 2  | LOC646836 | rs16848770 | 2  | LOC646836                     | 0.61 | 4.00E-19 | YRI_local | 0.18 |
| 2927722 | 6  | HEBP2     | rs9495068  | 6  |                               | 0.38 | 3.00E-10 | YRI_local | 0.18 |
| 2927722 | 6  | HEBP2     | rs11966257 | 6  |                               | 0.38 | 2.00E-10 | YRI_local | 0.17 |
| 2927722 | 6  | HEBP2     | rs2076273  | 6  |                               | 0.37 | 1.00E-09 | YRI_local | 0.17 |
| 2927722 | 6  | HEBP2     | rs6918995  | 6  |                               | 0.38 | 2.00E-10 | YRI_local | 0.17 |
| 3726569 | 17 | SPATA20   | rs989128   | 17 | CACNA1G                       | 0.49 | 2.00E-14 | YRI_local | 0.17 |
| 2946215 | 6  | HIST1H3B  | rs198820   | 6  | HIST1H2BC<br>///<br>HIST1H2AC | 0.35 | 3.00E-09 | YRI_local | 0.16 |
| 2676009 | 3  | TWF2      | rs4082828  | 3  |                               | 0.31 | 2.00E-08 | YRI_local | 0.13 |
| 2676009 | 3  | TWF2      | rs11715391 | 3  | PPM1M                         | 0.33 | 5.00E-09 | YRI_local | 0.12 |
| 2946215 | 6  | HIST1H3B  | rs537581   | 6  |                               | 0.36 | 2.00E-09 | YRI_local | 0.11 |
| 3726569 | 17 | SPATA20   | rs1122634  | 17 |                               | 0.40 | 4.00E-11 | YRI_local | 0.10 |
| 3726569 | 17 | SPATA20   | rs2306002  | 17 | EPN3                          | 0.38 | 1.00E-10 | YRI_local | 0.10 |
| 2946215 | 6  | HIST1H3B  | rs531750   | 6  | SLC17A3                       | 0.36 | 2.00E-09 | YRI_local | 0.09 |
| 3726569 | 17 | SPATA20   | rs3785915  | 17 | EPN3                          | 0.32 | 9.00E-09 | YRI_local | 0.06 |

|         |   |      |            |   |         |      |          |           |      |
|---------|---|------|------------|---|---------|------|----------|-----------|------|
| 2676009 | 3 | TWF2 | rs11717018 | 3 | TMEM113 | 0.35 | 1.00E-09 | YRI_local | 0.06 |
| 2676009 | 3 | TWF2 | rs1769     | 3 | TMEM113 | 0.34 | 4.00E-09 | YRI_local | 0.05 |
| 2676009 | 3 | TWF2 | rs352143   | 3 | TWF2    | 0.33 | 6.00E-09 | YRI_local | 0.03 |

<sup>a</sup> SNP position information was from dbSNP version 126

<sup>b</sup>  $r^2$  and p values were calculated by the QTDT software (see Methods).

<sup>c</sup>  $F_{st}$  was calculated for each SNP of interest using allele frequencies estimated from the unrelated individuals for each population used.
